# Supplementary material for: Mesenchymal Transition and PDGFRA Amplification/Mutation Are Key Distinct Oncogenic Events in Pediatric Diffuse Intrinsic Pontine Gliomas
Source: PLoS One. 2012 Feb 28;7(2):e30313. doi: 10.1371/journal.pone.0030313 (PMC3289615; doi:10.1371/journal.pone.0030313)
Supplement: Table S2 — (XLS) [file pone.0030313.s006.xls]

## Sheet: Sheet1
PROBEID	SYMBOL	CHR	CYTO.BAND	DIPG_med	hemis_med	midline_med	X11958_1	X12025_1	X27047_4	X27047_1	X45507_1	X12291_2	X12290_3	X12292_2	X27049_2	X27014_1	X27048_2	X27047_3	X27048_4	X27014_3	X27049_1	X27014_4	X27048_1	X27047_2	X27049_3	X27048_3	X12019_1	X12016_1	X12025_2	X11955_1	X11960_3	X12312_1	X11956_2	X12021_4	X12313_3	X12022_4	X12291_3	X12290_4	X12293_1	X12020_3	X12022_3	X11959_4	X12289_3	X12290_2	X12293_3	X12024_2	X11958_4	X12017_3	X12016_3
A_23_P6456	TRIOBP	chr22	q13.1	1.74906	-0.528142	-0.539937	-0.515538	-0.539078	1.85408	1.96863	2.39046	-0.554076	-0.702443	-0.753214	2.00995	2.09046	1.84997	1.74361	1.92759	1.72503	1.77283	1.95143	1.81841	1.87058	1.60855	1.74906	-0.394372	-0.567377	-0.420932	-0.290277	-0.638935	-0.418411	-0.230902	-0.294485	-0.544036	-0.335766	-0.514848	-0.643675	-0.617108	-0.736617	-0.402436	-0.539937	0.136664	-0.798304	-0.760806	-0.578746	-0.105437	-0.772954	-0.571126
A_23_P2293	HELB	chr12	q14.3	1.48432	-0.525011	-0.581548	-0.319254	-0.411011	1.82569	2.13361	1.76699	-0.497422	-0.0565171	-0.0421129	1.67142	2.13466	2.36869	1.5087	1.43982	1.77626	1.78794	1.95178	1.23504	0.753465	1.70511	1.48432	-0.189468	-0.169858	-0.209313	-0.0376107	-0.463692	-0.872368	-0.0623159	-0.156311	-0.874194	-0.524677	0.190384	-0.765145	-0.525346	-0.153684	0.74808	0.79955	-0.607484	-1.00198	-1.46247	-0.375764	-0.129697	-0.0900053	-0.986485
A_23_P74471	IQGAP3	chr1	q22	1.37948	-0.384602	-0.652668	-0.986782	-0.858237	1.64214	1.00329	1.67756	0.321201	-0.330739	0.989063	1.4199	1.37948	2.07273	1.52632	1.49863	1.07449	1.33706	1.47449	1.95549	1.59906	1.58747	2.02716	-0.782508	-0.755037	-1.2242	-1.14882	-0.76308	0.590439	-0.692509	0.651049	-0.952349	-1.32492	-0.183407	-0.756339	-0.296565	-0.845679	-0.248842	-1.05867	0.7823	0.501928	-1.22707	-0.365612	-0.659935	0.141773	-0.460136
A_23_P380754	PRSS1	chr7	q34	1.37697	-0.537275	-0.495513	-0.464518	-0.660364	1.57712	1.7659	1.72884	-0.402429	-0.605522	-0.428124	1.57103	1.28867	1.67575	1.6852	0.888002	1.43207	1.37697	0.844629	1.65811	1.75073	1.62897	1.88279	-0.23715	-0.867957	-0.904894	-0.748455	-1.0419	-0.31642	-0.299147	-0.881985	0.0244947	-0.892337	-0.612366	-0.868236	-0.420469	-1.14825	-0.61137	-0.658772	-0.139995	0.441098	-0.763236	-0.300649	-0.942372	-0.604213	-0.354946
A_23_P49988	KRTAP4-2	chr17	q21.2	1.3687	-0.400113	-0.565953	-0.507551	-0.730537	1.8164	1.83765	2.27284	-0.440596	-0.432495	-0.393782	1.61394	1.09269	1.3687	1.60313	1.66242	1.68677	1.42387	1.73763	1.51199	1.65575	1.30959	1.26175	-0.864067	-0.433865	-1.12357	-0.566368	-0.569561	-0.0976121	-0.287469	-0.25318	-0.0567237	-0.375731	-0.570479	-0.189073	-0.710123	-0.966613	-0.679348	-0.527383	-0.80514	-0.686197	-0.713824	-0.545158	-0.0480581	-0.288705	-0.228224
A_24_P826858	KIAA0556	chr16	p12.1	1.28189	-0.712721	-0.368294	-0.613646	-0.480403	1.28189	1.23346	1.81044	-0.803585	-0.846129	-0.618092	1.54617	1.1075	1.67515	1.43792	1.99489	1.26705	1.51475	1.40162	1.64741	1.63641	1.90892	1.70834	0.382596	0.439683	0.295902	-0.516645	0.0666512	-1.25069	-0.962853	-0.973413	-0.0725633	-0.344436	-0.460162	-0.410971	-1.31839	-0.469427	-0.932348	-0.779443	-0.282021	-1.23414	-1.3002	-0.335153	-0.976944	-0.767276	-1.31904
A_23_P323196	MDS2	chr1	p36.11	1.24061	-0.413853	-0.656093	-0.307453	-1.13193	0.899925	0.686441	0.816781	3.21416	-0.756506	0.32084	1.24061	0.427908	1.34929	1.59841	1.73431	1.57603	1.27678	1.37857	1.43657	1.65674	1.98785	1.69832	-0.125356	-0.443623	-0.637165	-0.762584	-0.75849	0.176826	-0.0853491	-0.783777	0.199098	-0.827564	0.284855	-1.07907	-0.101042	-0.264806	-0.927393	-1.05757	0.87014	0.222507	0.0955545	-0.85879	-1.52328	0.106414	-0.898012
A_23_P75529	PKNOX2	chr11	q24.2	1.15413	-0.809398	0.0123358	0.486793	1.2897	0.756375	1.18681	1.26542	1.4804	1.15413	-0.0913755	0.408085	1.2275	0.605338	0.326363	1.70924	-0.17201	0.274132	0.321667	0.504098	-0.280861	0.389602	1.27155	-0.363261	1.15875	1.71319	1.92458	1.16483	-0.699179	-2.10644	-1.52757	-1.457	-0.651436	-1.83898	-0.868883	-1.40978	-1.65806	-0.732566	-0.637534	0.0602884	0.310713	1.06242	-1.74643	-1.18475	-1.44069	-0.994035
A_24_P200854	HOXA2	chr7	p15.2	1.14339	-0.79619	-0.832033	1.11478	1.11957	1.10858	1.34068	1.19366	0.185375	0.997982	1.00642	0.921854	1.3608	-0.172681	-0.669476	1.49877	1.46497	1.5203	1.22787	1.47689	1.56343	1.283	1.71453	1.01616	1.12639	1.14339	-0.494138	0.73512	-0.83158	-0.813506	-0.883462	-0.370233	-0.77194	-0.793307	-0.886358	-0.799073	1.33633	1.79341	1.63845	0.203547	-0.870476	-0.80498	-0.771475	-0.787485	-0.872289	-0.792691
A_32_P52785	DAAM2	chr6	p21.2	1.13093	-0.85522	-0.206596	1.75644	1.76796	1.16281	1.62791	0.886603	-0.916002	0.143884	0.166984	-0.639589	0.80221	0.687537	1.15154	1.42394	1.19341	0.909665	1.17695	0.560454	0.858187	1.70044	1.13093	1.00571	0.437757	0.857712	1.92501	1.36951	-0.852586	-0.857854	-0.535362	0.512979	-0.448513	-0.263246	-1.73305	-1.50914	-1.14132	-0.883663	-0.39326	-0.180396	-0.791662	-0.692127	-0.698979	-1.17051	-2.01002	-1.01415
A_24_P250507	WFDC13	chr20	q13.12	1.13039	-0.505229	-0.663776	-0.740307	-0.230574	0.718969	0.822415	0.587164	0.552908	0.478611	0.669474	1.39685	1.13039	1.63694	1.16249	1.27298	1.00064	1.26008	1.45799	1.67232	1.59429	1.80393	1.43135	-0.353982	-0.66698	1.33297	-0.940327	-1.09797	0.627497	-0.931119	-1.08224	-0.988206	-0.709914	0.144659	-0.879287	-0.359604	-1.01777	0.0198602	0.965839	-0.479183	-0.246729	-1.02206	-0.481008	-0.881683	-0.573882	-0.589207
A_23_P252388	SPEF2	chr5	p13.2	1.12667	-0.668722	-0.530324	-0.242422	-0.680798	2.03113	1.81779	1.74663	-0.65141	-0.446979	-0.602921	1.80239	1.10773	1.65141	1.12667	1.04968	1.46853	1.06535	1.40465	1.35879	2.86409	2.43406	1.58051	0.0223295	0.211391	0.38288	0.498515	-0.410557	-0.92763	-0.98667	-0.667186	0.288599	-0.135191	-0.0494369	-0.438334	-1.24749	-0.279687	-0.935392	-0.476762	-0.27951	-1.10973	-0.530324	0.389857	0.591346	-0.915266	-0.958239
A_24_P453497	RBM20	chr10	q25.2	1.1163	-0.428982	-0.134264	1.2909	1.35055	1.33028	1.1163	1.1348	-1.41934	1.51306	1.63532	0.900474	1.32102	0.90265	1.36173	1.04872	-0.078981	-1.29494	-7.01894395748695e-05	-1.32529	0.0315747	-1.35595	1.04249	0.989104	1.46426	1.54397	1.45442	1.26506	-1.34839	-0.341175	-0.731837	0.193301	-1.33067	-0.382052	-0.373659	-0.94338	-0.601728	-0.804784	-1.02088	1.14541	2.28012	-0.884806	-0.920596	-0.755435	0.339429	-0.17841
A_23_P404575	RBM46	chr4	q32.1	1.10016	-0.532593	-0.812625	0.113742	-0.410819	1.44614	0.778174	1.83053	0.737299	-0.109611	-0.156979	1.35165	0.706694	1.47905	0.781116	1.56545	1.17587	0.857362	1.10016	1.37344	1.46629	1.59533	2.0782	-0.465591	0.25721	0.725655	0.982731	1.358	-0.769449	0.0022177	-0.214285	-0.912173	-1.14563	-0.319698	-1.51011	-1.20177	-1.09897	-0.927693	-1.27334	-0.313578	-0.784869	-0.639833	1.02895	-1.31967	-0.652156	0.422787
A_23_P91278	NFATC2	chr20	q13.2	1.09602	-0.354795	-0.397423	-0.727778	0.067969	1.24771	0.877193	0.746522	0.327997	-0.420716	-0.119348	1.85508	1.25433	1.31584	1.49433	1.49702	1.09602	1.39031	0.796473	1.37256	1.51475	1.44628	1.60199	-0.159557	-0.830895	-0.704087	0.231664	-0.94607	-0.442983	-0.298015	-0.778751	0.0815225	-1.11794	-0.784437	-1.3797	-0.0373455	-0.950025	-0.164561	-0.382932	0.482547	0.219566	-0.397423	-0.0269756	-0.272269	-0.50322	-0.44532
A_24_P413669	PFKFB2	chr1	q32.2	1.08235	-0.494017	-0.574952	2.47005	-0.636534	1.17351	1.08235	1.01412	-0.253188	-0.854294	-0.574952	-0.392784	-0.420841	1.24296	1.12645	0.44016	3.06341	-0.23238	1.27943	1.283	2.54477	1.23148	1.00483	-0.656746	0.861136	-0.807437	1.62904	1.13803	-0.992123	-1.17823	-0.890592	0.305104	-0.623819	-0.423845	-0.70069	-0.222822	-1.23186	-0.988197	0.673516	-0.229389	-1.37574	-1.49443	-1.17286	-0.410001	-0.483381	0.412999
A_23_P111571	HOXA3	chr7	p15.2	1.07033	-0.811782	-0.808235	1.44173	1.31362	0.68642	0.762153	1.38403	0.584687	1.28292	1.01795	1.07033	1.24989	-0.104694	-1.08469	0.96435	1.35942	0.893416	0.896029	0.857203	0.878809	1.11051	1.43284	0.831241	1.55961	1.49625	-0.999635	1.32012	-0.794624	-0.827616	-0.927621	0.513313	-0.884377	-0.867674	-0.877207	-1.07453	1.52646	1.82907	1.59387	0.779552	-0.90265	-0.891687	-0.779883	-0.913596	-0.818239	-0.805326
A_24_P316672	RALY	chr20	q11.22	1.06236	-0.557327	-0.621915	-0.734686	-0.999353	1.41025	0.909368	1.22717	1.05704	0.252756	3.99662	1.63579	1.07512	1.40812	1.63052	0.958519	1.06236	1.43396	0.889332	1.76072	1.28435	1.52137	1.31515	-0.509673	-0.397625	-0.441254	-0.436599	-1.20701	-0.604153	-0.568569	-0.678616	0.595032	-0.790423	0.227769	-0.75413	-0.560214	-0.505218	-0.697021	-0.92857	0.944706	0.242063	0.52695	0.364079	-0.658732	-0.483259	-0.774113
A_23_P101246	VSIG10L	chr19	q13.41	1.02864	-0.707497	-0.373488	1.22616	1.01531	1.7347	-0.735344	-0.207137	1.08407	-0.426317	1.00624	1.40789	1.44128	1.54885	1.194	1.27196	0.381798	1.48046	-0.0136982	-1.02386	-0.962115	1.50786	0.0326321	1.72977	1.02864	0.844738	-0.955839	1.40997	-0.45703	-1.19706	-1.75429	1.66734	-0.8667	-0.708159	-1.54106	-0.375361	-0.491541	-0.706836	-1.0427	-0.292354	-0.869662	-1.1381	-1.56643	-0.936076	-0.380334	-0.200433
A_23_P99275	KLRB1	chr12	p13.31	1.0212	-0.548104	-0.486462	-0.811469	-0.280035	1.0212	2.01202	1.60176	-0.596389	-0.248817	1.01959	3.46102	1.78475	2.09704	0.977967	0.876507	1.97433	2.28864	1.58016	0.865798	1.12647	1.41815	1.10222	-0.632042	-0.935891	-0.599996	-0.345224	-0.56001	-0.902515	-0.858965	-0.707612	-0.434843	-0.813457	-0.428671	-0.645881	-0.124562	0.0152128	1.1026	-0.684072	-0.62674	-0.458275	-0.905026	-0.549829	-0.909678	-0.791475	0.112559
A_23_P316612	GLIS1	chr1	p32.3	1.00645	-0.899905	-0.468227	1.35926	2.20468	1.23713	1.1659	1.94557	0.785151	1.87886	1.3892	0.363617	1.25425	1.00645	0.468796	0.730217	1.12988	0.444595	0.244541	0.416985	1.36333	-0.0816603	0.220071	0.110571	1.00845	0.537465	0.761901	1.08873	-0.61181	-1.25337	-1.25331	-0.208985	-0.966261	-1.41773	-1.36592	-0.833548	-0.841498	-0.194566	-0.429034	-0.41723	-1.35926	-0.468227	-1.03292	-1.04952	-1.14921	-1.03568
A_24_P410952	PEA15	chr1	q23.2	0.979832	-0.560694	0.366287	1.34536	1.38216	1.19707	1.02587	1.06904	0.45681	0.392843	0.468496	0.0360918	-0.137174	0.741893	0.355856	0.979832	0.844626	-0.261037	0.715554	0.47424	1.0113	1.33945	1.20591	0.738617	0.686373	1.01216	1.52343	1.07026	0.519671	-1.09019	-0.812776	-1.09173	0.365644	0.52991	0.576292	-2.23383	-1.31022	-2.41563	-1.54227	-0.360524	-2.76694	-0.988956	-0.603313	-1.152	-1.14469	-0.328973
A_23_P314672	C11orf40	chr11	p15.4	0.97293	-0.156099	-0.834247	-0.640264	-1.25689	1.57092	2.05878	0.603954	-0.376353	0.01613	-0.428905	1.65148	2.44347	0.97293	2.29972	0.450201	2.12275	1.09324	1.73823	1.03871	2.22752	1.04717	0.915181	-1.31538	-0.140061	-0.760447	-0.245723	-0.816575	1.18698	-0.224638	0.114466	-0.828865	-1.49414	-0.227395	-0.814801	-0.042268	-1.34825	-0.966734	-0.904959	0.814373	0.0363595	-0.456173	0.00317391	0.517144	0.223738	-0.139166
A_23_P17130	C2orf88	chr2	q32.2	0.964975	-0.905849	-0.50036	1.39368	1.26775	1.12059	0.673954	1.12178	0.350199	-0.317791	-0.720952	0.849353	0.247559	0.717502	0.964402	1.73035	1.75093	-0.148589	0.964975	0.461952	1.17335	1.20747	1.95574	1.09915	0.933019	1.33472	1.06772	0.546982	-1.41269	-1.45874	-1.42292	0.395458	0.611577	0.323502	-1.0234	-1.20364	-1.11832	-0.995003	-0.964958	0.734857	-0.88405	-1.67884	-1.45904	-1.12278	-1.64694	-1.37415
A_23_P323272	OSR1	chr2	p24.1	0.958485	-0.83377	-0.878906	1.02843	1.43437	0.595022	0.915069	1.36009	0.32051	1.60164	1.13909	1.0713	0.424671	1.0784	0.665978	0.958485	0.953835	-0.304168	1.01018	0.637131	0.866499	0.733924	0.927319	0.245944	1.11401	1.45991	1.55521	2.16491	-1.10996	-0.806111	-1.1281	-0.612464	-1.1167	-1.18051	-1.18253	-1.21794	0.212251	-0.762692	-1.14152	-0.772753	-0.0359585	1.73027	-1.10294	-1.11324	1.075	-1.05896
A_23_P429950	KAL1	chrX	p22.31	0.958169	-0.485441	-0.0612944	1.69926	1.65957	0.860729	1.87165	0.958169	0.463274	1.08084	0.864085	0.392519	0.365042	0.477848	0.55584	1.05391	0.252696	0.329711	0.856518	0.143579	0.131663	1.34663	1.24046	-0.281379	1.00855	1.19911	1.41592	1.5237	-0.471583	0.0311443	-1.15809	-0.583185	0.196359	-0.499298	-0.39026	-1.56529	-1.70855	-1.769	0.813569	0.809713	-0.985948	1.59809	-1.64966	-1.17367	-2.41835	-0.868745
A_24_P300379	PI16	chr6	p21.2	0.957236	-0.968535	-0.500115	1.94911	1.26925	1.24577	1.62026	1.45317	-0.473746	0.832348	-0.0739114	0.957236	-0.506294	0.857162	1.27467	0.267855	1.06022	0.612281	0.577468	0.832541	2.4477	1.71057	0.846457	1.25206	0.911737	1.27171	0.694117	1.27626	-1.18862	-1.24242	-1.14008	0.901932	0.0198173	-0.318856	-0.95678	-1.1262	0.339133	-0.898033	-0.65433	1.01805	-0.930863	-1.07241	-0.98029	-0.142977	-1.15918	-1.21957
A_24_P920992	EEPD1	chr7	p14.2	0.949798	-0.487109	-0.50066	2.12641	2.04466	0.788209	1.19994	1.17933	-0.282085	1.02765	0.465817	-0.694591	0.246512	1.01855	0.949798	1.46747	0.421132	-0.00528785	1.23623	0.0540362	-0.172953	0.76368	1.70095	0.52647	0.28812	0.780561	2.26802	2.37563	-0.00266955	-0.0670164	-0.0195741	-0.193446	1.01066	0.241411	-0.294315	-1.14153	-0.101278	-0.838429	-0.317441	-0.0553201	1.10225	1.17677	0.642879	-1.2719	0.0875055	-1.41821
A_23_P52067	GRHL3	chr1	p36.11	0.949562	-0.720756	0.0987768	1.4802	2.12735	1.21934	1.17637	1.03611	-0.296035	-0.0543237	1.71767	0.509164	0.830698	0.0342111	1.11761	0.851676	0.104566	-0.117866	0.960912	-0.425594	-0.326438	1.22722	2.08901	1.45809	0.664575	0.974825	0.949562	1.29848	-0.592979	-1.37478	-1.18637	-0.85777	-0.805074	0.0312548	-0.990996	-0.381465	-1.51527	-1.365	-0.00890308	-0.182204	-0.844632	-1.16428	-0.792489	-1.26682	-1.03118	-0.983748
A_24_P33077	HOXB2	chr17	q21.32	0.949431	-0.854997	-0.663151	1.26653	1.3003	0.406967	0.957996	1.09171	1.21487	1.10984	1.47546	0.709645	1.04334	0.640362	0.151357	0.330829	1.09955	1.03753	0.373677	0.949431	0.881812	0.819661	1.07594	0.885416	0.89562	0.81854	0.919095	1.36031	-0.855027	-0.530958	-0.800219	-1.2258	-1.20159	-0.752754	-1.2554	-0.663642	-1.00106	1.8132	0.920385	1.37237	1.44423	-1.26151	-1.20971	-0.854967	-1.17463	-0.202256
A_23_P170626	CHCHD7	chr8	q12.1	0.948387	-0.640576	0.0362147	0.976387	0.39961	1.05039	0.458017	0.220394	0.956333	0.573423	-0.056002	1.2408	1.1021	0.948387	-0.141339	1.03596	0.122806	0.0328876	0.470719	0.941162	0.010181	1.11191	2.01702	1.23347	1.26372	1.6989	1.19338	-0.160045	-1.46981	-1.28055	-0.989557	-0.641044	-1.63835	-0.718885	-1.59977	-1.03696	-0.686362	1.09327	-0.993712	-0.232569	0.452361	0.253594	-0.499337	-0.918485	-2.07355	0.0608661
A_23_P19894	AQP1	chr7	p14.3	0.94318	-0.808524	0.100035	1.07483	1.25483	1.10292	1.5998	0.94318	0.093038	0.675624	0.578008	1.03392	0.664715	0.711806	0.87953	-0.430029	0.991306	0.765251	0.817122	0.490405	1.09455	1.32119	1.72479	0.74824	0.66869	0.95665	0.688786	1.06442	-0.768554	-0.887799	-1.343	0.380165	-0.819555	0.20434	-1.88435	-0.810263	-0.0846337	-0.806784	0.8334	1.09927	-0.828942	-1.80721	-1.41034	-1.36734	-2.1258	-1.80149
A_23_P414211	PAX4	chr7	q32.1	0.941772	-0.625129	-0.703337	-0.397846	-0.948982	1.90281	1.34059	2.28277	-0.836733	-0.235088	-1.21428	1.03331	1.07635	0.71939	1.40279	0.867327	2.07269	0.941772	1.32871	0.947688	2.17424	0.678231	1.0547	-0.268313	0.321794	-0.523816	-0.606754	0.596796	-0.863156	-1.06133	-1.01371	0.499385	-1.09374	-0.699862	-1.0095	-0.386673	2.18	-1.25472	-0.703337	-0.0465451	-1.24334	-0.82573	-0.47672	-0.608025	-0.49006	0.752239
A_23_P75430	C11orf75	chr11	q21	0.940377	-0.553548	-0.104783	1.10909	1.21717	1.3607	1.07732	0.764384	0.98224	0.940377	0.415614	1.05685	1.26646	0.612424	0.199858	-0.0609302	1.18879	0.596407	0.912969	0.0757347	-0.545307	0.391362	0.374317	0.82933	0.900709	1.36758	1.61384	1.39433	-1.50336	-0.318112	-1.21694	-0.334267	-1.31299	0.0246644	-1.50875	-0.157002	-0.713016	0.720289	-0.154534	0.278582	1.02356	-0.411286	-2.26884	-0.755119	-0.529316	0.251323
A_23_P386	ARHGEF10L	chr1	p36.13	0.939928	-0.37353	-0.17565	1.12813	0.694787	1.15955	1.12107	0.356889	-0.180245	-0.0150814	-1.62681	-0.710066	-0.444979	0.902338	0.939928	2.03742	1.63173	-0.245388	-0.271163	-0.440688	1.27376	1.69184	2.41039	0.421025	0.404915	1.40089	1.12002	1.41562	-0.452442	-1.11102	-0.378686	0.423868	0.843426	-0.266812	-0.628684	-1.01642	-0.00501847	-0.388113	1.04803	0.0135059	-1.85122	-2.62966	-0.368375	-3.11391	-1.11845	-0.0310604
A_23_P335495	ANO7	chr2	q37.3	0.937398	-0.567581	-0.369787	1.52744	1.26681	3.81639	2.45688	1.25749	0.294856	1.69434	0.618491	-0.117559	-0.0144065	1.07733	0.998245	-0.860332	-0.140335	-0.811168	0.937398	-1.00852	-1.39142	-0.666442	1.01639	-0.00386666	0.557488	0.97521	1.63425	0.724023	-0.28863	-0.573104	-0.354191	1.26642	-0.607401	-1.06363	-1.22003	0.260957	-0.800588	-0.174427	-0.916188	1.48974	0.572117	-0.367033	-1.38664	-0.562058	-0.780972	-0.428685
A_23_P435649	C18orf16	chr18	q11.2	0.924467	-0.633794	-0.327043	2.31022	1.95523	1.89191	1.85985	1.12232	-0.353291	0.431191	-0.509599	-0.136516	-0.133409	0.840274	1.34111	1.77775	0.63995	0.955281	0.924467	-0.0418753	0.525742	1.1008	1.73777	0.97094	-0.638245	-0.173792	1.91211	0.854965	0.427207	0.570876	-0.477606	-0.345411	0.584321	0.552843	-1.28392	-0.684724	-1.57414	-1.60049	0.367789	1.17194	-1.03204	-0.156776	-1.52058	-1.10766	-1.08668	-0.932571
A_23_P23639	MCOLN2	chr1	p22.3	0.920611	-0.434158	-0.76468	0.146887	1.87262	0.909447	1.50792	0.920611	-0.215129	0.384559	0.0729191	1.1627	0.839354	2.4389	2.33376	-0.165197	1.33215	1.06999	1.48312	-0.360269	0.923688	1.03183	0.57085	-0.557729	-1.07604	-0.662794	0.841871	1.03305	-1.15984	-0.176702	-0.239483	-1.07869	-0.631379	0.553255	-0.0892934	0.892662	-0.76468	0.0469839	2.08114	0.288405	-0.923106	0.478921	1.49903	-0.605199	-1.06567	-0.505573
A_23_P54996	TEX14	chr17	q22	0.919886	-0.679523	-0.624385	1.38872	1.25546	-0.331615	0.388895	0.971172	-0.700014	-0.756246	0.342979	0.919886	-1.23263	0.782841	1.68087	1.42829	1.22787	0.769008	1.35082	0.518127	-0.548043	0.286482	1.70765	-0.624385	1.14158	1.00695	1.81315	0.689655	-0.575946	-1.07286	-0.921342	2.34515	-0.431719	1.01613	-0.2226	0.341331	0.819878	-0.241903	-1.02281	-1.01755	-0.238401	-0.489346	-1.02316	-0.194868	1.69072	-1.2421
A_23_P323180	HOXD3	chr2	q31.1	0.915797	-0.664745	-0.942472	-0.0373104	0.915797	0.465384	0.776347	1.15802	-1.11068	1.33254	1.03097	0.593412	0.653128	1.01745	-0.801234	-1.35162	1.71595	1.07942	0.886145	1.14616	0.771411	0.810909	1.40304	0.878659	1.19864	1.45648	1.48139	1.61547	-1.04277	-0.987493	-1.06424	0.412596	0.900455	-1.00578	0.0490538	-1.07683	-1.14393	0.975992	0.866279	0.374532	-0.108356	-0.942472	1.15706	-0.972781	-0.523614	-1.03308
A_23_P85783	PHGDH	chr1	p12	0.915434	-0.301985	-0.0215644	1.31102	1.86027	1.14796	0.935809	1.01083	-1.46862	0.348008	-0.230166	-0.528122	-0.713115	0.12321	0.687828	1.04166	1.06603	0.181484	0.635902	-0.0359742	0.547094	1.38782	1.21107	0.430915	0.915434	1.85063	0.805691	1.11705	-1.93232	-1.54671	-1.62962	0.136308	-0.443642	-0.160328	1.10445	-1.25928	0.712396	-0.0821542	0.796282	1.68459	0.684815	1.29078	0.639998	-1.49333	-0.141407	-2.16809
A_23_P162466	PKP2	chr12	p11.21	0.914516	-0.761483	-0.00404449	2.37866	1.82092	0.475451	1.05304	1.31667	1.12467	0.938069	-0.00404449	0.18155	-0.626018	0.0608964	1.05903	-0.0466285	-0.613203	-0.863946	1.542	0.352552	2.15725	-0.684196	1.40471	-0.400576	0.321849	1.23393	0.914516	0.893809	-0.694803	-0.923217	-1.0904	-0.718838	0.160124	-1.03606	-1.11025	-1.06227	2.74649	-0.333124	1.9742	-0.879955	0.332938	1.24642	-0.481912	-0.918885	-0.838764	-0.635447
A_23_P157435	AZIN1	chr8	q22.3	0.9144	-0.476044	-0.22597	0.27032	1.0538	1.60432	1.12935	1.43527	-0.564579	-0.023386	0.205529	0.389098	-0.744289	-0.967958	-0.0319638	0.442985	0.945441	-0.475145	0.9144	1.09806	2.61717	2.01891	2.23951	1.22032	-0.265976	0.957995	1.84885	-0.0622119	-1.27392	-0.314272	-1.0584	-0.187727	-0.325985	-1.12348	0.235965	-1.27254	-1.32233	-2.0249	-2.68479	0.352667	0.507775	-0.56338	0.996405	-1.40767	0.84471	-1.01936
A_23_P133878	MOG	chr6	p22.1	0.91439	-0.831928	-0.476734	0.946958	-0.595171	0.922968	-0.889948	-0.000497805	-0.635192	-0.345452	-0.321432	-0.049879	0.323336	0.565433	1.69921	0.95858	1.60212	1.51553	0.506649	0.91439	1.42674	1.29039	1.18333	1.56461	0.683817	1.07391	0.767754	0.928818	-0.470044	-0.853984	-0.985803	0.463033	-1.296	0.88861	-1.28377	-1.0438	-1.15613	-1.23261	-1.20497	-0.433373	-0.476734	-1.28253	-1.2173	-1.24142	-1.2518	-1.19218
A_32_P309404	SLC22A3	chr6	q25.3	0.910098	-0.902098	0.0579824	1.03558	0.514619	0.626483	0.706242	0.44223	-1.01743	0.89128	0.299516	-0.428532	0.755233	0.568437	1.41297	1.38029	1.10405	0.766434	0.996402	1.12925	1.28285	1.54625	0.910098	0.524544	1.51056	1.63218	0.848607	1.53687	-0.842438	-1.32077	-1.36392	-0.911556	-0.921807	-0.60523	-1.32808	-1.05275	0.373687	-1.26942	0.0579824	1.08073	-1.3967	0.234211	-0.886469	-0.564969	-1.4377	-0.788704
A_24_P919150	ACAN	chr15	q26.1	0.909818	-0.91312	-0.324839	0.640763	0.120464	1.37482	0.451197	1.02142	0.191559	1.18434	1.31065	-0.633173	1.33014	1.33154	1.1019	1.35868	1.11781	0.659656	0.390228	0.760388	0.909818	-0.254602	0.32095	0.468088	1.51735	0.854889	1.27129	1.65349	-0.8846	-0.261557	-1.20747	-0.968086	-1.53948	-1.08835	-1.32243	-1.17824	-1.12833	0.111627	-1.00674	-0.908889	0.329794	-1.24343	-1.17122	-0.49303	-0.917351	-1.53082
A_23_P144916	GFPT2	chr5	q35.3	0.90081	-0.539929	-0.546538	1.10658	0.855512	0.999178	0.90081	1.06982	1.56399	1.89444	0.848652	1.96571	1.06558	0.395596	0.206134	0.931317	0.626849	0.096603	-0.0405908	-0.264171	1.07141	1.02005	0.806277	1.18445	0.527075	0.778946	0.486236	1.24164	-0.154213	-1.58314	-1.44692	0.751031	-2.28163	-1.16737	-1.89014	0.55812	-1.41515	0.293336	-0.728749	-0.885449	-0.723834	0.983203	-2.52122	-0.634407	-1.66053	-0.825442
A_23_P75790	C11orf9	chr11	q12.2	0.900525	-0.616413	-0.442117	0.554023	0.00786517	0.562536	-0.17521	-0.221473	0.0472485	-0.155463	-0.344538	-0.380234	0.170255	0.877307	2.01907	1.20952	1.42381	1.4094	0.913119	0.925238	1.1808	0.878949	1.19385	1.41176	0.900525	1.13983	1.59998	1.1308	-0.460503	-1.53271	-1.42114	-5.12379571659642e-05	-1.41892	0.406886	-1.0337	-0.994142	-1.71344	-0.360954	-1.30418	-0.54744	-0.893165	-1.03432	-0.995133	-1.19997	-0.827242	-1.35421
A_24_P279704	MAG	chr19	q13.12	0.900379	-0.692043	-0.388053	0.900379	-0.454022	0.963314	-0.864183	0.0703642	-0.532245	-0.111759	-0.0769122	-0.219766	0.433956	0.754742	1.58563	0.842943	1.46695	1.46473	0.658724	0.935682	1.29356	1.33365	1.0978	1.37148	0.826714	1.15273	1.00748	1.13727	-0.852156	-1.38032	-1.50973	0.689705	-1.36272	1.0512	-1.59087	-0.621874	-1.01875	-0.762155	-1.29513	0.0457333	-0.117712	-1.21925	-1.11249	-1.2709	-1.14681	-1.00713
A_23_P39898	CALCRL	chr2	q32.1	0.89781	-0.614637	0.0750873	1.06209	1.15085	0.89781	1.2778	0.773511	0.260468	0.740873	0.642522	1.12847	0.276775	0.617141	1.39854	1.11707	0.238001	0.0709068	1.44747	0.0170573	0.542466	1.13848	1.45275	1.18665	0.650737	0.820482	1.23118	1.1493	-0.422494	0.495743	0.253491	-0.65851	-0.668654	-1.06703	-1.07688	-0.202833	-1.43125	-0.325784	-1.02304	-1.45824	-0.693677	-1.62181	-1.7404	-1.3556	-2.12602	-0.361427
A_24_P24387	ABI3BP	chr3	q12.2	0.897074	-0.609376	-0.143275	0.668439	1.24276	1.52678	1.04876	0.788355	0.888259	1.18966	0.834182	0.795869	-0.0922633	1.1345	0.954953	0.858965	0.897074	0.175499	1.13283	0.0975701	2.73909	1.00614	1.32861	0.796651	0.283562	0.24706	1.17358	0.326372	-1.17792	-1.53496	-1.55136	0.149487	-1.44842	-0.119127	-1.30364	-0.216308	1.77564	-0.977056	-1.30796	0.241733	-0.0365447	0.305933	-0.290231	-1.37369	-1.30893	-1.36597
A_32_P15838	CTNND2	chr5	p15.2	0.893232	-0.37354	-0.251799	1.33548	1.19581	1.18023	0.893232	0.149593	-0.340493	0.0538995	-0.251799	-0.198634	-0.100299	0.0813677	0.928395	0.344851	1.03166	0.733213	0.136187	0.959527	0.266262	1.45357	1.13958	0.939291	0.73334	0.970161	0.944459	1.3122	-0.94614	-1.72847	-1.49008	-0.0311051	-0.017409	-0.500375	-0.782547	-0.991709	-1.38172	-2.44499	-0.846715	-0.333382	-2.22615	-1.05023	-1.6691	-2.90697	-1.25877	-0.198622
A_24_P261083	OSGIN2	chr8	q21.3	0.891998	-0.338341	-0.451912	2.38912	2.05514	0.998799	1.05367	1.32077	-0.12856	-0.170974	0.541874	0.263637	-0.108271	0.644517	0.678707	1.85096	1.33435	0.0164306	0.891998	0.146906	0.193676	1.41084	2.01669	0.670191	-0.169758	0.176152	2.27677	1.29797	-0.24061	-0.333653	0.117343	-0.562114	-0.995268	-1.60442	-1.34258	-0.652133	-1.11216	-1.6393	-1.66528	0.242044	-0.429732	-1.10122	-0.523442	-1.27599	-1.40807	-0.281495
A_23_P209799	MYO7B	chr2	q14.3	0.890481	-0.690316	-0.644073	1.22112	2.11492	1.81667	0.0819773	0.890481	0.679642	1.99682	1.60805	-0.527677	-0.64802	1.11762	1.90577	2.05223	1.11523	-0.227414	0.398993	0.442639	-0.0437099	-0.364236	1.12898	1.82653	-0.369767	-0.0986271	1.56077	2.19388	-0.456039	-0.708332	-0.921135	0.969222	0.101389	-0.787436	-0.853985	0.403083	-0.801475	-0.672301	1.13746	-0.221755	-1.10801	-1.19734	-0.870116	-0.987103	-1.17824	-0.904297
A_23_P81103	SFRP2	chr4	q31.3	0.88954	-0.987877	-0.0465268	1.6979	2.07234	-0.239624	1.34638	0.79094	0.0601694	0.957241	-0.405194	0.214108	0.547677	1.22875	1.39739	1.24243	0.647593	1.05633	0.658649	0.330256	0.426206	1.61959	1.66947	1.20717	0.672122	0.638112	0.88954	1.26833	-1.3475	-1.01888	-1.31404	-0.460162	-1.35271	0.0406284	-1.46878	-1.42732	0.454554	0.0397676	-0.840318	-0.562733	0.772236	-1.10896	-1.35293	-1.2928	-1.40469	-1.06353
A_23_P380857	APOL4	chr22	q12.3	0.889437	-0.436552	-0.200228	0.889437	1.39476	1.02624	2.2523	1.51621	1.0763	1.34083	0.888117	1.29609	2.80736	2.57764	-0.512074	0.0480355	0.514859	0.683824	1.22721	0.999845	-0.140584	-0.233266	-0.162805	-0.558409	-0.0705913	-0.0481304	-1.28216	0.227395	-0.0997322	-0.642135	-1.33487	-0.477904	1.74402	-0.192735	-1.37477	-0.333327	-1.09718	-1.57651	1.01667	0.0543695	-1.23002	-0.995614	-1.2283	-0.461443	-0.375744	0.208504
A_23_P254768	HCG4	chr6	p22.1	0.88816	-0.682276	-0.0988186	0.525485	1.84704	2.10458	1.11913	-1.46795	0.572448	0.88816	0.417716	1.28552	0.778315	0.663925	1.00626	0.156387	0.551464	-0.774443	1.50381	0.626439	1.52698	1.8616	1.13615	1.82234	0.920433	0.729913	1.4078	0.636087	-1.36618	-1.03182	-1.04466	0.349638	-0.335852	-0.912669	-1.25928	-0.333907	-0.506444	-1.09179	-1.2244	-1.32584	1.35393	-1.00829	-0.598176	-0.760465	-1.19047	-0.131519
A_23_P10947	STAC3	chr12	q13.3	0.880336	-0.369948	-0.295419	-0.60239	-1.46559	0.880336	1.33771	2.45223	-1.08537	-0.927074	-1.63282	1.31226	2.47395	3.42468	1.08467	0.980737	0.819462	1.66462	2.50916	0.408224	0.797211	1.16147	1.13969	-0.260299	-0.721124	-0.820434	-0.750839	-0.158299	0.181049	0.9636	0.026843	-0.874346	0.571596	0.2245	-0.331551	-1.19827	-0.251466	-0.517783	-0.441042	-0.524459	-0.27392	0.289004	0.269219	-0.0324036	0.054056	0.364447
A_24_P274928	ZNF703	chr8	p11.23	0.876064	-0.47798	-0.604286	2.56089	1.92827	0.964593	1.28828	1.56556	-0.482488	1.32918	0.894289	-0.360765	0.00518188	0.263624	-0.239476	1.74026	0.640861	0.365939	0.973988	0.876064	0.27709	1.07231	1.17539	0.523993	0.320282	0.86852	0.491638	0.8916	-0.351443	-1.07811	-0.749525	0.780704	1.4531	-0.185186	-0.360009	-1.9368	1.11169	-1.74382	-1.02585	0.235719	-0.956804	0.433846	0.981672	1.74799	-0.739227	0.132883
A_23_P252062	PPARG	chr3	p25.2	0.874672	-0.56373	-0.208465	1.64701	1.98144	0.874672	0.926498	1.53766	1.14456	1.27628	0.714557	1.87836	1.39775	0.882499	-0.0925058	-0.558227	0.484706	0.674728	0.525502	0.0660626	1.22535	0.867471	-0.28199	1.71237	-0.0343727	-0.015599	0.392424	1.0583	0.0469342	0.140344	0.204291	-0.525177	-1.8258	-0.736855	-1.69593	-1.7155	-1.31037	-0.617207	-2.20831	-1.06774	-1.15568	0.0963175	-1.85154	0.901187	-1.13668	-0.362488
A_23_P33816	WDR87	chr19	q13.13	0.87413	-0.533706	-0.584287	-0.726407	-0.60688	0.848359	0.846836	1.08937	0.300482	4.55817	0.214504	1.13544	0.699923	1.02245	1.32293	0.940399	0.769668	1.38996	0.889666	1.07097	0.87413	1.15781	1.17533	-0.719005	-0.666316	-0.803893	-0.398118	-0.637479	-0.675957	-0.780702	-0.834237	-0.669685	-0.719478	0.806643	-0.419558	0.311934	-0.614659	-0.78008	-0.694008	-0.487736	-0.618152	-0.963041	-0.721053	-0.446065	-0.614785	-0.683243
A_23_P49448	FAAH	chr16	q23.1	0.871734	-0.902078	0.063823	0.679613	-0.32865	0.871734	-0.500182	-0.0903838	-0.981407	-0.493375	-0.549261	-0.658757	-0.1113	0.629942	1.4464	0.947814	1.45401	1.43032	0.504749	0.640926	1.10911	1.24207	1.66888	0.85014	0.989919	1.23148	1.05204	1.30001	-0.875811	-1.39608	-1.4875	0.535629	-1.55116	0.592283	-1.55809	-0.978148	-0.95789	-1.51019	-1.1037	-0.600566	-0.633548	-1.4229	-0.929224	-1.55945	-1.19418	-1.45511
A_32_P31240	SEMA3D	chr7	q21.11	0.87159	-1.16993	0.10642	0.494295	0.935036	0.662498	0.994981	1.07973	-0.40653	0.799407	0.657736	0.278892	-0.330995	0.0608004	0.87159	0.990483	0.952212	0.0985025	0.204679	0.377243	1.66681	1.37862	1.87355	0.375196	1.38516	0.866155	1.8647	2.08657	-1.35616	-1.45659	-1.55608	-1.1867	-1.53574	-0.574159	-1.34631	-1.34751	-0.738647	0.0454854	0.0510512	0.427357	1.37352	0.895066	1.49753	0.0424235	-1.2836	-1.5275
A_23_P125495	CDR1	chrX	q27.1	0.871491	-0.651778	-0.41745	-0.643941	-0.546374	0.96409	-0.4414	0.913782	-0.378282	0.871491	-0.444309	1.03551	1.35509	1.24182	0.98116	-0.178387	1.33245	1.06121	0.822012	-0.182752	0.638172	0.97812	0.721934	1.16337	0.790714	0.819411	1.15431	1.34035	-0.987927	-1.11258	1.12795	1.30627	-0.637584	0.814794	-0.628935	-1.34154	-0.339768	-1.44896	-0.834565	0.803474	-1.58074	-1.67484	-0.665972	-1.68868	-1.6356	-1.56656
A_23_P390700	CNTN1	chr12	q12	0.870834	-0.792092	0.289425	0.870834	1.17393	0.799094	0.931637	0.354785	-0.0913695	0.282628	0.413182	0.197085	0.131582	0.0177098	1.05816	1.20288	0.366974	0.432604	0.951474	1.08483	1.69923	1.47656	1.28596	1.47848	0.901823	1.10094	0.717455	0.221705	-0.974379	-1.62001	-1.69174	-1.27046	-1.08369	-0.511906	-1.73046	-1.13344	-1.51711	-1.54936	-0.568741	-0.519297	-1.34233	-1.62306	-1.40705	-1.7869	-1.66832	-1.68436
A_23_P355536	USP54	chr10	q22.2	0.858618	-0.451611	-0.610895	-0.0663443	-0.930876	1.52009	0.551176	1.01744	-1.23185	-0.864774	-0.610895	0.397757	0.464223	0.858618	2.31604	1.89033	2.43883	2.1166	1.3931	0.85867	2.26609	1.53717	1.14325	-0.537595	0.461187	-0.664984	-0.174868	-0.312244	-0.518342	-0.569734	-0.690806	-0.352903	-0.440687	0.623694	-0.657934	-1.37993	-0.622228	-1.70632	-1.19504	-0.785964	-1.63544	-0.859771	-0.161665	-0.708061	0.279962	0.320133
A_23_P208085	MBP	chr18	q23	0.85725	-0.865621	-0.561483	0.915077	-0.418438	0.960109	-0.702206	0.422738	-1.07968	-0.0426481	-0.195185	-0.269737	0.313659	0.834344	1.64777	0.85725	1.57452	1.56079	0.673733	0.935795	1.40118	1.41965	1.14797	1.44587	0.830539	1.34954	0.823827	0.915527	-0.867885	-1.35926	-1.32146	0.739775	-1.25518	1.29195	-1.17916	-1.09231	-1.0388	-1.21494	-1.15382	-0.144843	-0.561483	-1.142	-1.00192	-0.471755	-1.22781	-1.25721
A_23_P138541	AKR1C3	chr10	p15.1	0.853504	-0.563264	0.12655	1.15359	1.26836	1.57399	1.01146	0.737535	0.502163	-0.194101	0.198446	0.853504	1.69476	0.853244	0.86576	1.23355	0.197771	0.446277	0.884693	-0.0808141	1.29718	1.59269	0.959962	1.68347	0.461427	0.127043	0.586049	0.102675	-1.49183	-0.511216	-1.10399	-0.580744	-1.11917	-0.545785	-2.36695	-1.92226	-0.468538	-1.23167	-1.84878	0.47688	-1.22058	-1.54431	-1.62614	-2.03532	-1.89028	0.172821
A_24_P926580	FIGN	chr2	q24.3	0.849129	-0.412066	0.246175	1.24467	0.712293	1.10911	-0.264271	-0.23767	1.19433	1.74834	0.246175	-0.304189	0.101827	1.0497	0.450969	-0.115696	0.208321	1.07233	-0.515729	0.849129	0.863452	-0.479388	-0.363123	-0.0328163	1.05002	0.989308	1.71774	0.981555	-1.13002	-1.79009	-1.61011	-1.62362	0.0388527	-0.476463	0.331078	0.671998	-0.0057632	-0.129831	0.919882	-0.0253798	-1.73301	-1.66634	-0.122655	-1.50625	1.05195	-0.276084
A_23_P209726	SP140	chr2	q37.1	0.848695	-0.348443	-0.343346	0.127973	0.198243	1.00233	0.460948	1.04148	0.924506	0.446917	-0.237359	1.71909	1.62478	1.28363	0.616402	0.848695	1.87153	1.86627	1.01496	0.251749	-0.710225	1.6638	0.95888	0.397247	0.48304	0.486504	-1.1231	0.334453	-0.305148	-0.859976	-1.42003	-0.102093	-0.391739	-0.683285	-1.1613	0.31381	-0.834622	-0.995325	-0.526751	-0.258886	-0.664956	-1.66096	-1.52589	0.304221	-1.47632	0.186633
A_23_P17420	BCAS1	chr20	q13.2	0.845195	-0.464444	0.309837	0.15778	0.0407977	1.18966	-0.208796	0.300839	-0.0839535	0.226935	0.106934	-0.218733	0.396096	0.751762	1.57736	1.12511	1.31499	0.982152	0.649984	0.988337	1.0389	0.614474	1.36433	1.16739	0.845195	1.27584	1.30902	1.14495	-0.458731	-1.81991	-1.6089	-0.236965	-1.82372	0.222628	-1.86472	-1.51248	-1.68917	-1.43675	-0.622344	-0.470157	-0.556086	-1.65956	-1.61014	-0.428988	-1.72796	-1.76176
A_23_P212119	GALNTL2	chr3	p25.1	0.845073	-0.364617	-0.225064	-0.108599	-0.325097	1.25376	1.32236	1.01502	0.874573	1.31897	0.631249	1.31294	0.505517	1.16033	1.56579	0.651079	1.55371	1.01922	0.189956	0.0646886	0.845073	0.816599	1.45935	-0.331598	0.552021	-0.688153	-0.684004	0.214761	-0.838599	-2.43812	-1.74338	0.490887	-0.678132	-0.023914	-1.55968	-0.35021	-1.14772	-1.16799	-0.373533	1.02284	-0.340091	-1.40637	-0.693429	-2.45785	-2.11148	-0.797885
A_23_P128050	BCL2L14	chr12	p13.2	0.844821	-0.478117	-0.519122	-0.454382	1.6168	-0.163549	0.481023	1.32658	-0.584551	-0.195518	0.907824	0.899266	-0.0532602	1.55179	0.844821	1.38096	1.01299	0.746519	0.867607	-0.167882	0.463178	3.11347	0.884843	1.00875	0.507933	0.892874	1.60099	0.721548	-1.04219	-0.742975	-0.438423	-0.377293	-1.62087	-0.534038	-1.65638	1.07796	-0.519122	-0.38433	0.625162	1.57684	0.887584	1.10972	-0.527804	1.0531	0.563736	-0.86108
A_23_P98159	TPCN2	chr11	q13.3	0.840313	-0.445287	-0.656544	1.50896	-0.214639	0.568773	1.39784	0.767022	0.731251	1.08058	-0.0848425	0.870752	-0.862049	-0.84495	1.37793	1.04316	-0.510672	-0.567117	1.08498	-0.0234112	0.599116	0.840313	1.7103	0.965739	0.527043	1.24225	1.4204	1.74891	-0.659976	-0.900377	-0.675699	-0.90025	-0.114697	-0.520877	-0.216421	-0.748508	0.0308318	0.891071	-0.676465	1.27031	-1.69911	-0.754952	0.919938	-0.907978	-1.59006	-1.06968
A_23_P120056	RTKN	chr2	p13.1	0.83844	-0.462348	-0.215434	1.04164	0.0699669	0.58416	0.0837638	0.903135	-0.00173019	0.907796	-0.215434	0.106166	0.368042	0.83844	1.44996	1.20312	0.606767	1.06124	0.348542	0.849627	0.597153	1.17305	1.5712	1.11195	0.255298	0.930363	0.574426	1.09407	-0.4735	-0.911435	-0.623567	-0.370263	-0.360037	-1.26221	-0.719295	-0.270796	-2.00604	-0.581882	-0.66584	-0.374149	-1.5311	-3.0082	-0.451196	-2.16523	-0.669569	-0.219743
A_23_P31945	IL33	chr9	p24.1	0.838186	-0.316832	-0.258401	0.46666	1.1318	0.822322	0.909559	1.18848	1.15987	0.838186	0.541449	1.43099	0.556909	0.596082	0.423886	0.973879	0.568822	-0.351355	0.630244	-0.506038	1.10484	0.780918	0.856485	0.5752	0.481059	0.908308	1.15298	0.846184	-1.25061	-2.22623	-0.213268	1.73472	1.0416	0.276058	0.286518	-0.679833	-0.17434	-1.8708	-0.258401	1.21924	-1.37114	-1.11782	-1.06713	-2.15504	-2.39014	0.382299
A_23_P166993	EPHB1	chr3	q22.2	0.837283	-0.538346	-0.243602	0.837283	0.932785	0.19739	0.37642	0.93566	-0.125639	1.21586	0.471971	0.441406	0.751014	1.16561	1.14246	0.759853	0.735077	-0.0836326	1.34278	-0.0310247	0.718769	0.71711	0.94151	1.3297	1.19123	1.55171	1.76469	1.11296	-1.54514	-0.591719	-1.1103	-0.96836	-0.22485	-1.1595	-2.01635	-1.61011	-1.89554	-2.34625	-0.692464	0.22801	-0.618935	1.31123	0.442323	-1.06907	-0.61324	-1.69535
A_23_P315212	NTSR2	chr2	p25.1	0.830549	-0.904709	-0.113482	1.29737	1.47145	0.969475	1.06911	1.23084	-1.28193	0.380324	-0.113482	-0.546586	-0.311837	0.0247507	1.01869	0.785303	1.08819	0.547889	0.830549	0.134282	0.712577	1.66769	0.830418	1.14965	0.608255	1.01423	1.79619	1.41237	-1.41198	-1.34879	-1.34558	0.432214	-0.881565	-0.392189	-1.26244	-0.686911	-0.996315	-1.27565	0.731755	1.21879	-0.969325	-0.75403	-1.12455	-1.24269	-1.32588	-1.22611
A_32_P153071	VIPR2	chr7	q36.3	0.828267	-1.20989	-0.129454	1.45057	1.12264	0.416812	0.989717	0.900571	-0.0807915	0.497281	0.185174	-0.143032	0.434091	0.487852	0.731972	1.30766	0.828267	0.326484	0.516575	0.498735	1.18922	1.26516	1.82849	1.08476	0.808206	1.19116	1.04491	1.27065	-1.43373	-1.45428	-1.26363	-0.627271	-0.428419	0.790637	-1.29249	-1.25238	1.22232	-1.45485	1.66789	1.04774	-1.29877	1.3548	-1.24301	0.129083	-1.30074	-1.33598
A_23_P14853	LTK	chr15	q15.1	0.828158	-0.724619	0.148429	1.50479	1.37551	-0.321701	2.00775	0.935627	0.83687	1.76739	1.08693	0.755411	1.86989	1.31941	1.12306	0.494092	-0.526408	0.828158	0.73336	0.605925	-1.30174	-1.3846	-1.11217	0.266738	0.199324	-0.78049	1.24801	1.34272	-1.40728	-1.18656	-1.12444	-0.352645	-0.783661	-1.05304	-0.402712	-0.093724	0.234134	0.436067	-0.922773	-0.78879	0.201857	-0.330167	-1.17969	0.37309	-1.09876	-1.27447
A_24_P920851	CRYBG3	chr3	q11.2	0.826775	-0.564694	-0.0758703	1.44145	1.55591	0.569644	1.03682	0.826775	1.00457	1.20933	0.884679	0.615425	0.129786	0.275677	-0.661741	-0.680771	0.632819	-0.156973	0.952412	-0.290406	0.727497	0.206449	0.988237	0.397939	1.40391	1.77509	1.27473	2.17236	-0.227161	0.161669	-0.211499	-0.611524	-1.00021	-1.10723	-0.674988	-0.594354	-1.55827	-1.18661	0.201913	-0.801093	0.303767	1.11664	-0.84282	-1.28579	-1.27305	-0.137684
A_23_P131394	SLC16A14	chr2	q36.3	0.824774	-0.545216	0.172098	-0.251996	1.66955	0.824774	0.719623	1.00157	-0.548244	-0.163343	0.880328	-0.703136	1.30183	1.09153	0.842942	1.38896	0.0466197	0.902374	1.16148	1.16815	-0.407459	1.14598	0.875435	-0.505231	-0.0160918	0.140608	0.706623	0.599169	-0.867778	-1.08488	-0.159985	-0.540834	-0.608792	-0.37707	-1.57919	-1.67857	-1.71016	-2.65961	-0.757292	-1.40346	-2.08745	0.550647	2.00417	-2.13272	1.37905	0.766666
A_32_P524904	C11orf86	chr11	q13.2	0.824404	-0.502089	-0.581644	1.16974	1.25913	0.134354	0.426372	0.476915	-0.299879	-0.262433	0.0909826	0.824404	-0.229393	-0.266466	1.12132	-0.0455924	0.998735	0.0702939	0.901758	1.02148	4.61892	3.7036	0.880408	1.13754	0.898925	1.91356	0.545181	0.25079	-0.402134	-0.824914	-0.422591	1.40345	-0.811133	-0.877449	-0.615456	-0.561953	-0.908953	-0.625324	-0.0494515	-0.525445	-0.793903	-0.720409	-1.00886	0.235047	-0.370385	-0.492423
A_23_P216455	RLN2	chr9	p24.1	0.824178	-0.646999	-0.478285	-0.13788	1.94781	1.57544	1.07723	0.0741435	0.107294	0.299421	0.67631	0.374315	-0.323547	0.107232	0.951995	0.99507	0.337977	0.559726	0.939496	0.0433546	0.848617	1.07489	1.80438	1.0406	1.26292	0.824178	3.36266	-0.135988	-0.426537	-1.10967	-1.35286	1.04573	-0.883308	-1.05015	0.424272	-1.05462	-0.922091	0.665161	0.394368	0.0453402	0.28246	-0.0176613	0.469959	0.0215498	0.597045	0.541041
A_24_P940006	EFNB3	chr17	p13.1	0.820452	-0.525394	-0.331266	-0.201413	0.631582	0.945768	1.2032	0.650848	0.737358	1.19917	1.17059	1.08331	0.824526	0.820452	0.527554	-0.326714	-0.0651972	-0.229374	0.917718	0.654624	1.41922	2.18292	1.77928	-0.553813	0.666942	-0.59787	1.1969	1.07126	-0.154913	-0.810858	-0.884481	-1.25346	-0.909277	-0.545427	-0.619862	-0.972287	-1.32125	-2.11937	-0.376482	-0.761947	-0.866305	-1.14628	-2.04044	0.767723	1.01229	-0.505362
A_24_P146188	ANKRD6	chr6	q15	0.819838	-0.163495	-0.212334	0.482484	1.3984	1.11951	1.82103	0.802997	-0.280737	1.06988	0.95879	0.0178102	0.114251	0.819838	0.909596	1.6149	0.470856	-0.18007	0.524614	-0.842659	0.952474	1.17049	0.941259	1.07463	-0.455743	0.375722	1.58138	1.05207	-0.938435	-0.854771	-0.971258	0.61276	0.176485	0.765128	0.450258	-1.11876	0.529851	-0.167572	-0.502336	0.562663	-0.212334	-0.836534	0.307153	-1.51815	-1.83999	-1.8445
A_23_P388433	C4orf3	chr4	q26	0.819042	-0.539557	0.112252	1.04488	1.27543	1.67824	1.20295	0.853073	0.219847	1.01447	0.818619	1.81931	0.222674	0.28284	0.819042	0.215077	-0.583656	-0.78546	1.18157	0.287357	1.6957	1.01477	1.83816	1.21508	-0.0301987	0.354632	-0.389527	0.144849	-0.558884	-1.09649	0.236268	-0.28528	-1.6669	-0.379491	-0.610034	-1.49097	-1.55952	-0.665485	-1.29502	-1.72764	0.964356	-0.836403	-0.492089	-1.88875	-1.7121	0.685312
A_23_P39550	TMEM163	chr2	q21.3	0.816046	-0.27213	-0.214975	0.896893	0.900855	0.741423	0.85578	1.37419	0.373524	1.52414	0.709266	1.11756	0.816046	0.526745	0.997421	0.355618	0.613724	-0.441036	0.450926	0.714608	0.440918	0.905034	0.635647	1.03501	0.639079	0.949035	0.864009	1.1321	-0.26493	-1.25726	-0.798948	-1.65504	0.875873	-0.0979836	-1.70853	-0.812243	-1.56339	-0.522946	-0.0639943	0.468537	-1.24092	-1.42279	-0.27933	-1.42786	-2.1146	-0.465027
A_24_P379820	ITM2C	chr2	q37.1	0.815073	-0.527998	0.132943	1.25425	0.945058	1.08477	1.87236	2.18208	0.536892	0.963131	0.517634	0.889505	0.815073	1.39109	0.562663	0.861043	-0.231103	0.208267	0.721061	0.272571	0.503311	1.00981	1.31909	0.293292	-0.334763	-0.328889	0.495229	0.807334	0.251785	0.0237921	0.177638	-0.484895	-0.646764	-0.854378	-1.08403	-2.00458	-1.54941	-0.401213	-0.505898	-0.298428	-1.73618	0.116495	-3.35224	-1.44673	-1.26375	-0.791187
A_23_P303833	SCN4B	chr11	q23.3	0.814492	-0.445524	0.160165	0.539576	0.814617	1.05795	0.580872	0.724205	0.644768	0.897102	0.349872	0.566153	0.814492	0.510097	0.890128	0.146215	-0.0163193	0.220426	0.880464	0.0934404	0.811779	1.11262	1.02789	1.01628	1.01727	1.63086	1.29856	0.999827	-0.324501	0.160506	-0.000652261	-1.81094	-1.22016	-1.3748	-0.863488	-0.137652	-0.696267	-2.17029	-0.88763	-0.146951	-0.78889	-0.789455	-2.45287	-1.35324	-1.41791	-0.571006
A_24_P234242	ACADL	chr2	q34	0.813153	-1.05335	0.125884	0.898494	1.82337	1.03484	1.57134	1.23053	0.198356	0.796423	1.51886	0.813153	1.07124	0.326053	0.972994	1.48086	0.561918	0.391371	0.80515	0.723533	0.0376563	0.740929	0.974349	0.536712	0.222327	0.699986	1.36601	0.944344	-1.4782	-1.32617	-1.39701	-1.51733	-1.25139	-1.47116	-0.44325	-1.60997	0.971242	-1.62267	-0.380159	-1.33375	-1.50338	1.70116	0.777062	-1.2195	-0.601901	-0.73803
A_24_P343736	SYT9	chr11	p15.4	0.812332	-0.920033	-0.0287992	1.06507	1.85472	0.911495	1.21197	0.812332	-0.453848	0.308746	0.399592	0.580802	0.833106	0.525998	1.2463	-0.623217	1.27927	0.681051	0.929839	0.679894	0.996236	1.53597	0.98805	1.31656	0.490978	0.63735	0.00470675	0.728403	-1.27534	-1.31521	-1.36593	-0.873351	-0.952508	-0.505528	-1.31123	-1.20169	-1.05301	-1.10401	-1.31605	-0.887558	-0.952901	1.12257	2.01803	-1.29255	-0.471366	-1.37037
A_23_P161331	PCDH15	chr10	q21.1	0.811966	-0.862045	-0.0998599	0.811966	0.949687	0.699248	0.86705	0.345402	0.497255	0.854477	0.8398	-0.925012	0.225088	0.393902	1.27666	0.859199	0.676777	0.905645	1.22153	1.16454	-0.439983	0.697225	0.767891	-0.332504	0.93248	0.571274	1.30696	0.966423	-0.616786	-1.50138	-0.902321	-1.55699	-0.776834	0.790434	-1.48701	-1.41728	-0.800764	-1.18803	-1.23405	-1.03979	-1.44197	-1.43009	-1.47656	-1.52929	-1.4743	-0.748492
A_23_P3159	CBLN3	chr14	q12	0.811557	-0.348872	-0.455327	-0.207652	-0.794395	1.93048	2.00917	2.894	-0.824647	-0.323751	-0.686576	1.06131	1.9689	0.668308	1.86317	0.612063	1.807	1.02083	1.67631	0.796725	1.84835	1.16125	0.811557	2.81548	-0.387102	-1.32134	-0.675585	-0.578994	-0.0908599	-0.137363	-0.036821	-1.15083	-0.816584	-0.944867	0.241047	-0.354314	-1.3356	-0.617086	0.0445835	-0.885528	-0.117632	-0.299421	-0.238793	0.190803	-0.0374556	0.841803
A_23_P71821	PBX3	chr9	q33.3	0.810499	-0.521929	0.144978	1.13766	0.872613	0.76094	1.12452	0.690302	1.24935	1.23273	1.52715	0.672184	1.29455	0.79908	0.242226	0.851429	0.449515	0.709387	0.810499	0.503035	0.729934	1.24846	0.686309	1.02684	1.24759	1.1578	0.964801	0.443163	0.14682	-2.08563	-0.602159	1.09815	-0.4417	-2.22649	0.0328634	-0.0852692	-1.45501	0.00593772	0.186348	0.225773	-2.11908	0.21186	-0.629076	0.326651	-0.133683	-1.13397
A_24_P105102	PKMYT1	chr16	p13.3	0.809323	-0.175194	0.0613651	0.724486	0.874577	0.0628443	1.1114	0.602373	-0.236331	-0.0999545	0.448929	-1.26783	0.906749	-0.221679	0.365202	0.809323	1.14201	0.793071	1.23529	2.01306	1.07785	0.861372	0.486394	-0.931712	0.0626787	1.06366	1.2399	1.28424	-0.716092	0.0355679	-0.18888	-0.914814	1.01738	0.15349	0.500627	0.488651	0.529894	-0.161508	0.984425	0.47386	0.347495	0.567057	1.37684	0.535488	0.557837	-1.78651
A_24_P150580	RASL12	chr15	q22.31	0.808225	-0.81159	-0.279232	2.42923	1.71061	1.56122	1.62504	1.15948	0.992947	0.700362	0.507096	0.0136283	0.603861	0.31319	1.26727	0.528433	0.808225	0.0561768	1.29739	0.292229	0.730387	0.631514	1.39245	0.427142	0.0321694	0.256131	1.25488	1.80721	-0.43461	-0.188329	-1.09031	-1.14536	0.797954	-0.810359	-1.31579	-1.48277	-0.640144	-0.820023	-0.905125	1.04546	-1.01889	-1.49417	-0.4701	-1.02244	-2.19792	-1.11349
A_24_P181510	ZNF646	chr16	p11.2	0.80557	-0.753563	0.208517	0.82619	0.733282	1.31675	1.00004	0.770928	0.832994	0.22469	0.132241	1.29633	0.717913	0.697022	0.903116	1.05895	0.904804	0.395151	0.142874	-0.0789986	0.872548	1.38972	0.960155	1.08664	0.597463	0.399593	0.60927	0.80557	-0.368304	-2.03774	-1.46282	1.23355	0.669396	-1.11944	-1.77044	-1.02989	-1.43225	-1.92862	0.217458	-0.601954	-1.66684	-2.00696	-1.17719	-1.72268	0.540307	0.157318
A_23_P134980	FGD3	chr9	q22.31	0.804228	-0.262947	-0.0496408	0.36466	1.14404	0.332287	0.597978	-0.0368094	-0.681081	0.26348	-0.796646	0.599819	0.623658	0.936093	0.916062	1.07633	1.05265	0.804228	0.0978109	-0.0212767	0.738259	1.25786	1.02453	0.750822	1.02176	1.47409	1.18786	1.96949	-0.267319	-1.0061	-0.572638	0.465221	0.969985	1.16097	-2.78305	-0.258575	0.81054	-0.0908766	0.227543	0.160821	-2.05934	-2.02737	-0.914713	-1.47574	-0.21076	-0.221941
A_24_P91916	NXT2	chrX	q23	0.801522	-0.678319	-0.197809	1.36025	1.2072	1.16315	1.55024	0.609063	0.823112	0.664469	1.26126	1.00553	0.462926	-1.14659	0.585151	0.770058	-0.226256	0.430509	1.20854	1.33498	-0.223886	1.52508	0.130212	1.03033	0.556351	0.884629	0.801522	0.920605	-1.25943	-1.01969	-1.07232	1.10977	1.44491	1.03381	-0.0711495	-0.701229	-1.0612	-0.787382	-0.701884	0.806368	-0.736331	-0.861906	-1.60604	0.465149	-1.212	0.134794
A_23_P83931	NET1	chr10	p15.1	0.800433	-0.765792	-0.246796	0.592407	0.834368	2.03187	0.851875	0.330499	0.445561	0.028615	0.185124	0.121488	1.31973	0.800433	1.11607	1.02389	1.44974	0.855086	0.564488	0.630978	0.749606	0.57716	0.632826	0.351746	1.16155	1.40543	2.07059	0.401831	-2.05927	-0.27722	-0.526351	-1.35163	-1.72024	-1.83775	-1.38858	-1.21905	1.22602	0.524524	-2.49001	-0.775015	-0.761673	-0.974341	-1.96708	0.715892	-0.317756	-0.0821099
A_23_P36187	SYT8	chr11	p15.5	0.799727	-0.552225	-0.61648	-0.533783	-0.430359	1.50548	1.52412	1.97591	-0.0272088	3.24008	0.686893	1.1524	1.53994	0.853675	1.02924	1.02171	0.578428	0.790589	0.888357	0.783633	0.875885	0.799727	0.581287	-0.84925	-0.0261806	-0.132686	-0.857112	-0.180407	0.176474	0.133181	-0.742739	-0.781693	-0.707685	-0.451163	-0.551095	-0.553355	-0.972674	-0.493412	-0.975046	-0.443278	0.870413	-1.01773	-0.0108034	4.15295	0.830975	-0.669205
A_23_P48414	CCNA1	chr13	q13.3	0.799259	-0.699078	0.0070987	-0.118071	0.374268	-0.853108	1.49129	0.208375	1.45478	0.605735	0.704621	0.808617	1.68111	1.69038	-0.107221	0.123072	0.151258	0.839779	0.799259	2.32696	1.0827	0.864302	0.118116	0.0158455	0.83643	1.38947	-0.542116	-0.265227	-1.34025	-1.23391	-1.34723	-1.11314	-1.15216	-1.38229	-1.1189	-0.474548	0.130721	-1.19616	0.244292	-0.95328	-1.22146	-1.51525	-0.127679	2.06909	-0.126461	-1.32975
A_23_P68121	PSD4	chr2	q13	0.798717	-0.546102	0.0941994	0.99837	1.70785	0.798717	0.281461	1.31702	-0.0475476	1.57648	0.0941994	1.78454	1.33773	0.938908	-0.422429	-0.891409	0.439271	0.633798	0.463878	-0.279695	1.03272	1.36058	0.063094	0.486512	0.324282	1.29525	0.254698	1.1245	-0.176832	-0.66029	-0.23709	-0.826411	-1.60383	-0.5179	-0.328353	-0.123011	-0.482025	0.0255705	-0.557214	-0.814551	0.0769101	-1.72987	-2.46915	-1.06416	-1.23485	-1.01271
A_23_P37994	TP53TG3	chr16	p11.2	0.798013	-0.873158	-0.18746	1.09204	0.944461	0.294	0.941947	0.602106	2.14805	0.349774	0.144734	1.34557	0.169403	0.394098	-0.420652	1.24851	-0.444132	-0.299086	0.101004	-0.488922	0.693108	0.798013	1.82742	-0.18746	1.14132	1.54881	0.935576	1.09982	-0.345705	-1.08403	-0.516209	-0.929108	-1.02147	-1.34269	-1.10502	-0.549722	-1.37477	-0.110992	-0.94812	-0.858554	0.949839	-0.224462	-1.21808	-1.23759	-0.758501	-1.25345
A_23_P17316	NKAIN4	chr20	q13.33	0.796538	-0.64125	-0.134877	1.12418	1.20453	0.796538	0.770033	1.01624	-1.24282	-0.155464	-0.502632	-0.235479	0.111245	1.0927	1.16196	1.3643	-0.147617	0.630648	0.492705	0.497972	0.402274	2.15733	1.94468	1.45699	0.532513	1.33929	1.71764	1.3148	-0.687443	0.17935	-0.326616	-1.03336	0.635968	-0.845338	-1.04715	-0.989501	-2.51632	0.684278	-1.60338	0.88501	-1.0316	0.546581	0.957746	-1.00242	-0.757049	-0.748205
A_24_P170403	C2orf78	chr2	p13.1	0.796145	-0.44453	-0.444142	-0.601005	-0.426355	0.600466	0.793717	1.11987	0.10015	-0.153193	0.181561	1.18553	2.44737	0.845797	0.796145	1.16248	3.87708	0.958207	0.782953	1.05552	0.946995	0.932554	1.13763	0.0655909	-0.607752	-0.442725	-0.594953	-0.764205	-0.35312	0.0529943	-0.757537	0.110233	-0.664873	-0.051177	-0.73027	-0.589497	-0.354063	-0.223445	-0.622211	1.61171	4.18642	-0.393024	-0.447624	-1.19021	-0.55977	-0.748916
A_32_P336776	FRMD7	chrX	q26.2	0.795719	-0.684231	-0.192026	-0.893406	-0.934081	0.847314	0.880137	1.82459	0.465863	-0.509467	-0.526709	0.815673	1.39536	0.972849	0.557623	0.651766	0.688553	0.908521	0.956584	4.68961	0.847412	0.588539	0.85566	1.65245	0.190757	0.795719	-0.754003	-1.02188	-0.472909	-0.220103	-0.922771	-0.794706	-0.959039	-0.12223	-0.694153	-0.907639	-0.781368	0.268266	-0.865669	-0.921408	-0.662201	-0.192026	-0.730429	-0.347264	-0.839279	-0.623879
A_32_P197489	KLF13	chr15	q13.3	0.793021	-0.584497	-0.248695	-0.0436061	0.0432811	-0.184827	0.793021	-0.163604	0.388393	1.18192	1.38847	-1.05306	1.03391	-0.132046	0.978004	1.53474	1.47912	0.754027	1.05341	-0.181458	1.9877	0.448459	1.15376	-0.31848	0.680096	1.0072	1.45014	0.872023	-1.81001	-0.393218	-0.834756	-2.69041	0.106205	0.722555	-0.576825	-1.00313	-0.445164	-0.354575	0.0042755	-0.61646	0.30001	-0.248695	2.52178	-0.893294	0.954889	-1.41773
A_24_P13285	PPP1R1A	chr12	q13.2	0.792929	-1.01353	-0.0289167	2.12826	1.25594	1.17195	0.586586	1.01623	-0.73414	0.893008	-0.244769	0.0626406	0.792929	0.0304419	0.576448	0.768579	1.55679	0.356283	0.929185	0.626886	1.59723	0.906564	1.01842	0.741425	0.274007	0.290597	0.687372	1.45918	-0.906789	-1.22091	-1.26685	-0.229959	-1.51167	-0.463973	-1.12027	-1.20686	-0.676413	-1.4629	0.281361	1.19708	-1.06816	0.791149	-1.3261	-1.59004	-1.18319	-1.45548
A_23_P10062	MGAT4C	chr12	q21.31	0.788822	-0.436761	-0.213322	1.6094	1.92677	1.28887	0.720411	1.34185	-0.650643	-0.0121437	0.388959	-0.687144	0.345067	0.221797	1.09068	-0.720901	-0.0663629	0.0828268	0.788822	-0.638438	0.790476	0.937736	0.999696	0.747511	0.701002	0.995958	1.76945	1.92548	-0.80591	-1.44396	-0.484088	0.0508121	0.328421	0.739218	-0.962343	-0.635176	-0.213322	0.361209	-1.47696	-0.0480808	-1.3706	-1.13751	-1.42732	-1.51009	-1.37816	-1.13192
A_23_P142455	SIRT2	chr19	q13.2	0.788108	-0.469668	-0.142468	0.274056	-0.20454	0.788108	0.470022	0.547326	0.00373823	0.116425	-0.115643	0.242121	0.101436	0.92943	2.3266	1.7682	1.83385	0.825943	1.20981	1.49835	0.201403	1.17811	2.02042	1.25123	0.212181	0.807608	0.761573	1.50632	-0.242817	-1.67746	-1.51038	0.0666847	0.242625	-0.425945	-0.511191	-1.14038	-1.57682	-2.07586	-1.40892	-0.428144	-1.74301	-1.80608	-1.19243	-1.02498	-1.66938	-0.404792
A_24_P935243	C8orf34	chr8	q13.2	0.787791	-0.291847	-0.513691	1.01088	1.61448	1.01692	0.784112	0.61834	-0.961813	-0.422024	-0.510022	0.190866	0.0571801	-0.478693	0.705258	1.13071	-0.0505326	-0.584091	1.09536	0.113035	2.33195	2.30174	1.44959	-0.166919	0.84097	1.41085	1.05588	0.787791	-0.319894	-0.114745	0.205842	-1.30097	-0.278847	1.37073	-1.23773	-0.672205	0.177184	-1.23129	-0.975464	0.709014	-1.27277	-0.513691	-0.602543	0.207339	-1.28814	0.611658
A_24_P55295	GJA1	chr6	q22.31	0.784579	-0.289467	-0.0799565	0.885068	1.34565	0.941729	0.774894	0.625947	-0.437126	0.342864	-0.25197	0.334567	-0.400975	-0.117368	0.893346	1.06355	0.694006	0.323475	0.941511	-0.343448	1.43734	1.72797	0.962384	0.827101	0.368982	0.784579	1.19487	1.17209	-0.283349	-0.203605	-0.325408	1.66531	0.178543	-0.416069	-0.0298753	0.488127	-0.175374	-1.22708	-0.352194	0.269901	-1.59146	-1.712	-0.77683	-2.85424	-1.65708	0.881261
A_23_P129291	TGM5	chr15	q15.2	0.784358	-0.544744	-0.525863	1.68887	4.10583	1.50856	2.11266	0.697611	-0.106663	-0.42292	0.0154838	1.88908	-0.364552	0.784358	2.08755	0.0136405	0.531984	0.970232	0.329603	0.309335	1.61039	1.39074	0.64975	-0.256445	-0.483825	-0.298222	0.863745	1.0483	-0.742734	-0.667765	-0.90338	-0.531753	-0.968187	-0.493116	-1.47579	-1.05993	-0.922813	-0.517403	-0.942663	-0.733425	-0.876508	-1.1019	-0.557734	-0.38709	-0.178921	-0.470183
A_24_P41189	RNF19A	chr8	q22.2	0.783573	-0.236296	-0.336003	0.783573	0.721994	1.60419	1.69552	0.323665	0.608304	0.977573	1.0902	2.00578	0.748444	1.07349	0.697935	0.729908	0.322366	-0.063624	0.116835	-0.125245	1.88193	1.22954	1.0249	0.274697	0.928025	1.42428	0.89793	-0.480364	-0.225794	-1.41917	-1.0258	0.123914	0.0322652	-0.1189	-1.4969	0.765336	-0.105442	-1.48746	0.333618	0.204327	-0.297652	-0.424565	-1.63559	0.777561	1.15281	-1.20105
A_24_P81965	RAP2A	chr13	q32.1	0.781652	-0.677207	0.0256005	0.900079	1.30163	0.499338	0.427843	0.26562	0.073838	0.443285	-0.0708181	-0.134527	-0.342573	0.381191	1.50384	1.24846	0.530779	0.443542	0.967035	0.955619	0.781652	1.25457	1.64615	1.4164	0.767836	0.980949	1.01658	1.52058	-0.70191	-0.652504	-1.08241	-1.75296	-0.41253	-0.63645	-1.79015	-1.65589	-0.758738	-1.21659	-1.56392	-0.78614	-1.86234	0.340608	-2.39236	-1.16815	-0.759186	-0.877086
A_23_P211445	LIMK2	chr22	q12.2	0.780948	-0.646788	-0.156095	1.24418	1.30741	1.60185	1.9466	1.55448	0.780948	1.88782	1.4301	1.16243	1.4209	1.00556	0.633672	0.648018	0.53635	0.0630416	0.454364	-0.246417	0.488921	0.291692	-0.971002	-0.590745	0.47916	0.783893	0.667654	1.02916	-0.570419	-1.10293	-1.14421	-0.989573	-0.365727	-0.492578	-2.17925	-0.556913	0.687523	-0.818998	-0.156095	0.895118	0.297423	-1.25237	-0.480763	0.231006	-0.945644	-0.139039
A_23_P41304	GYPE	chr4	q31.21	0.780855	-0.776233	-0.358857	1.16454	1.02569	-0.931517	1.18798	0.301387	0.750562	0.166032	-1.11833	0.174622	0.83935	1.53629	1.75701	1.95919	-0.824072	-0.940331	1.18284	0.479926	0.491662	-1.0882	2.12307	1.63419	1.18227	1.50879	-0.65694	0.780855	-0.839062	-0.638422	-0.759318	-0.859935	-0.910307	-1.03741	-0.996745	-0.969263	-1.11203	-0.816557	-0.875836	-1.11976	-0.956696	-0.831264	1.00329	-0.472968	-0.757617	-0.503778
A_23_P77993	C1QL1	chr17	q21.31	0.779341	-0.657335	0.128082	0.640756	1.00309	1.06578	0.67994	0.917916	0.99875	1.22947	0.773035	1.71823	1.0055	1.06216	0.244579	0.761402	-0.144416	0.214741	0.280481	0.328288	0.934425	1.01573	1.32595	0.793137	0.545459	0.779341	0.0921662	0.38289	0.575482	-0.800779	-0.305312	-0.782052	-1.25668	-1.46754	-1.06957	-2.2916	-2.10583	-2.01589	-1.50834	-0.0144971	-0.29418	-0.507868	-0.375357	-1.6532	-0.222967	-1.83248
A_24_P103264	UGT8	chr4	q26	0.77844	-0.75319	0.0876416	0.310127	-0.0812204	0.599766	-0.0705169	-0.00286037	-0.261346	-0.097776	-0.193606	-0.488884	0.208079	0.636893	2.15361	1.33036	1.2697	1.26513	0.999495	0.851518	1.26344	1.01689	1.81233	1.84027	0.77844	0.859392	0.510129	0.84388	-0.842741	-1.81404	-1.82033	-0.580154	-1.88546	-0.0532375	-1.99256	-1.43151	-0.798469	-1.19283	-0.82089	-1.01035	-0.583596	-0.894048	-1.28579	-1.67475	-1.25575	-1.63342
A_23_P119835	NLRC4	chr2	p22.3	0.777893	-0.345525	-0.520771	-0.49882	0.77143	1.6043	0.919068	0.455982	0.857298	1.1839	0.0778533	1.96126	1.9123	1.24041	0.869704	0.0378051	1.36068	1.08292	0.777893	-0.501322	-0.0127945	1.0619	0.182911	0.144305	-0.638198	-0.22399	0.339214	-0.242946	0.73773	0.52202	0.347558	0.326367	-0.408288	0.0146597	-1.78049	0.140755	-0.0838355	0.962797	-1.39179	-0.343184	-1.14484	-1.38223	-2.05632	-0.496374	-1.19945	0.943219
A_23_P2814	SMAD9	chr13	q13.3	0.77745	-0.255992	-0.0444555	1.46227	2.03428	0.463999	1.01309	1.56233	-0.292684	0.253955	1.0207	-0.45294	0.77745	0.359628	1.39784	1.29592	0.626515	-0.36378	0.224786	-0.700878	0.782732	0.673557	0.914518	0.0785738	0.630235	0.857042	0.894672	0.891085	-2.00993	-0.0956789	-0.404791	0.756366	0.289146	-0.00660157	-3.13876	-0.685183	0.401881	-0.325292	1.22478	-0.100241	-2.03841	-0.583478	1.387	-1.25152	-1.66798	-1.30362
A_23_P145054	FAM162B	chr6	q22.1	0.776142	-0.712422	0.202459	0.297247	1.14391	0.771767	1.14892	1.16984	1.16251	0.712434	1.53557	0.385489	1.08361	1.0739	0.647365	0.578041	1.21279	0.825537	1.07814	0.78908	0.110176	0.443964	-0.556152	0.942185	0.500826	0.599771	1.28311	0.776142	-0.661273	0.707388	-0.564871	-1.97794	-0.985648	-0.66706	-1.19714	-0.973295	-0.171295	-1.46486	-1.62802	-2.28676	-0.751418	-1.07661	-2.05506	-1.51604	-1.54873	-0.498654
A_23_P45361	GLUD2	chrX	q24	0.772458	-0.798064	0.0765459	1.74099	1.9397	1.00568	1.30017	0.830205	-0.438495	0.586382	-0.0539339	0.38332	0.856183	0.550736	0.582982	1.5519	0.312357	0.62334	1.1734	0.189612	0.603305	1.07255	1.43556	0.713553	-0.00858237	0.772458	1.43825	0.746693	-1.01222	-1.19237	-0.89645	0.263881	-1.5861	-0.88038	-1.29262	-0.715748	-1.49951	-1.36665	-2.01394	-0.223956	-1.81589	-1.06818	-1.06498	-1.17503	-1.52003	0.0996888
A_23_P345692	IL17D	chr13	q12.11	0.772418	-0.520163	-0.229892	1.17149	1.76888	0.772418	0.764767	0.702244	-0.37145	0.560156	-0.274606	-0.531363	-0.31039	-0.109101	0.859306	1.41077	1.04981	0.3459	-0.173626	-0.331046	1.3564	0.822033	1.39092	0.365014	0.644787	1.00311	1.45569	1.30575	-0.911614	-0.853779	-0.404624	0.580668	-0.323313	-0.150325	-1.82211	-1.57874	-2.04742	-0.653847	-0.229892	0.786121	-2.24072	-0.29429	-0.746599	-3.07303	-2.06448	-0.627149
A_23_P146576	GBGT1	chr9	q34.2	0.771121	-0.394951	-0.447918	0.462205	-0.178748	0.713406	1.10561	0.879535	0.919605	0.771121	-0.0720081	2.04974	1.54075	0.31647	1.65681	-0.596904	0.142703	0.869048	0.954275	0.0699557	1.64522	0.971611	0.337024	0.702148	0.750536	1.56924	-0.316473	-0.467531	0.657065	-0.178805	-1.37	0.399509	-1.58079	-0.366317	-1.74693	-0.590234	-0.75276	0.356961	-1.50608	-0.777312	-0.447918	-1.88631	-2.34131	1.51536	0.624407	0.5565
A_24_P309095	RELN	chr7	q22.1	0.76951	-0.714477	-0.567598	1.03952	1.43401	0.667263	1.27685	0.952971	-0.259413	0.272737	1.62096	-0.473468	0.76951	-0.0210668	0.749764	-0.508837	-0.101195	0.499227	-0.154845	-0.160549	1.35075	0.90781	1.4032	1.27589	1.15703	1.14022	1.64635	1.17542	-1.2417	-1.23891	-1.25904	-1.03463	-1.09962	0.500354	-1.31848	-0.940039	0.379331	0.478411	-0.119306	0.98719	-0.0644086	2.98	-0.842038	0.509351	-0.164716	-0.283523
A_24_P519672	HRASLS	chr3	q29	0.7656	-0.622132	0.0517945	-0.000163984	0.108078	0.541483	-0.0624598	-0.0642479	0.333879	0.103023	-0.430051	-0.436956	-0.357633	1.0421	1.73354	1.36038	0.7656	0.755276	1.18885	0.956893	0.49094	1.24665	1.3849	1.22461	1.46139	1.71798	1.35276	1.07006	-0.916707	-0.983537	-0.78814	-2.37026	-2.47335	-0.829655	-2.35995	0.185189	-0.703667	-0.511907	-0.886869	0.399482	-1.14418	-0.814948	-0.827365	-0.660722	-0.752012	-1.48886
A_24_P234462	TMIE	chr3	p21.31	0.764162	-0.574339	-0.375024	0.00281565	1.52358	-0.138038	0.915939	-0.394366	0.186592	0.764162	-0.992156	2.535	1.36912	1.19616	-0.0542312	-0.47598	0.988787	-0.0553863	-0.291449	-0.124233	2.52133	1.49169	2.76227	1.35774	0.565335	1.44501	1.56637	0.477131	-1.31754	-1.05539	-1.05718	-0.311401	-1.04927	-1.36455	-0.196551	-1.56174	-1.04221	-0.945226	0.0900911	1.10995	-1.34749	-0.862946	1.32056	-1.19827	-0.242892	-1.09564
A_32_P86739	C10orf114	chr10	p12.31	0.760405	-0.370937	0.194587	0.894863	0.971992	0.323328	1.04369	0.78182	-0.177769	0.480593	-0.442282	1.05411	0.854094	0.760405	-0.376182	0.946167	0.322533	0.000960977	0.222773	0.0886045	-1.07781	1.09727	1.13642	-0.478257	0.377458	0.985858	0.773079	0.484257	-0.700654	0.147928	-0.458498	-0.743726	0.020858	-0.580632	0.0086138	-0.913049	-0.386449	-0.41352	-0.460448	0.956635	1.22674	2.67782	0.924921	-2.47884	-3.22869	-0.324179
A_23_P382811	SNX31	chr8	q22.2	0.759256	-0.664753	-0.532519	-0.440069	0.883626	-0.871483	1.2598	-0.746152	0.0210349	-0.404497	0.777611	-1.07487	-0.398871	0.0799138	1.69339	2.43733	1.47988	1.18764	0.634448	1.22179	-0.849361	1.34905	2.3206	-0.808611	0.585166	0.759256	1.8785	1.67267	-0.937057	-0.676928	-0.12686	-0.256031	0.902623	0.0432418	-0.667571	-0.836433	-0.388818	-0.886256	1.27206	2.5049	-0.880915	-0.994492	-0.923196	-0.661935	0.546371	-0.275864
A_23_P66593	GFAP	chr17	q21.31	0.753851	-0.814226	0.340591	0.867532	0.942418	1.10914	0.96048	1.16374	1.1255	0.965691	1.02393	1.27821	1.10191	0.753851	0.249966	0.55519	0.440923	0.287546	0.0625812	-0.0913967	1.68004	0.524445	0.867805	0.197318	0.580376	0.514687	0.230827	0.317469	0.209331	-1.50041	-0.999963	0.818403	-0.896392	-0.683499	-1.84597	-0.908437	-2.10599	-1.98557	0.762808	0.108396	-1.37774	-2.1771	-1.5488	-2.01431	-0.850429	0.0761475
A_24_P2584	SMOC1	chr14	q24.2	0.752672	-0.768729	0.13788	1.1033	1.43469	0.63076	0.678443	0.786083	-0.260313	0.179184	-1.17958	-0.834	0.155986	0.606023	1.21731	1.01181	0.62785	0.563151	1.03684	0.752672	0.612372	1.03321	1.04809	0.769465	0.739115	1.36837	1.01875	1.33545	-0.671395	-0.94347	-1.36083	-1.97025	-1.33577	0.74962	-1.29531	-1.70785	0.873472	-2.3115	0.249222	0.405349	-0.706167	-1.12952	-0.272951	0.0576502	-1.39581	-2.19943
A_23_P120863	GAL3ST1	chr22	q12.2	0.752215	-0.598219	0.116746	0.308205	-0.0119964	0.569831	-0.165672	0.02321	0.114291	-0.0178891	-0.162945	-0.561882	-0.0638938	0.533732	1.61761	1.0978	1.16388	1.06025	0.924421	1.29515	0.752215	0.246882	1.16972	0.770098	1.14834	0.993148	1.27002	1.44537	-1.08212	-1.46078	-1.7209	-0.417884	-2.11281	-0.538849	-2.0023	-0.38695	-1.9825	-1.39111	-1.6801	-0.699689	-1.15378	-1.20769	-1.24769	-1.34791	-1.11307	-1.28895
A_23_P399255	RNF182	chr6	p23	0.749912	-0.843305	0.376494	0.373986	0.756893	0.644402	0.54823	0.996837	0.724177	0.352357	1.20157	0.208	0.607378	0.0340088	0.913949	1.19886	0.389995	0.177873	0.561189	0.756044	0.749912	0.828694	0.878279	0.366025	1.00038	1.45292	1.52109	1.278	-1.04237	-0.0854856	-0.518139	0.0767102	-1.38814	-2.81139	-2.14718	-0.547732	0.374506	-1.86598	-0.20756	-1.08925	0.893497	-0.915632	1.10359	-1.66321	-1.66762	-0.36587
A_23_P253932	FAIM	chr3	q22.3	0.747217	-0.673073	-0.259702	0.503608	1.04298	-0.147866	0.879233	0.121856	0.141387	0.252326	-0.583932	0.375437	0.747217	1.13276	0.646838	1.5452	0.00101246	0.661381	1.04413	0.290435	1.3781	1.34392	1.21454	-0.259702	1.08812	2.24652	1.34693	0.670566	-0.840164	0.272751	0.541157	0.130056	-1.37126	-1.56625	-0.843381	0.124268	0.390806	-2.26561	-0.257641	-0.68333	0.885646	-2.68883	-2.16844	-0.210835	-0.606739	-1.64036
A_23_P66881	RGS9	chr17	q24.1	0.746266	-0.691663	-0.354116	0.572635	1.30704	1.11201	0.983271	0.73713	0.0396236	0.789527	0.620097	0.441969	0.314156	0.90883	0.882564	0.595029	0.746266	0.0407144	0.0384291	0.181312	2.07621	0.596203	1.02503	0.872421	-0.268053	0.769598	1.38475	1.25287	-1.003	-1.63526	-1.55904	-0.254982	-1.26455	-0.741209	-1.81552	-1.10983	-1.2712	-1.39462	-0.474586	-0.31623	0.325594	-1.85185	0.204113	1.48072	-1.31473	-1.0684
A_23_P81507	FAT2	chr5	q33.1	0.743368	-0.547559	-0.413371	1.30868	-0.422744	0.593578	0.760573	2.05413	-0.255038	-0.392022	-0.717724	0.853655	0.743368	0.671291	1.43717	0.121389	2.04986	1.98445	0.398911	0.856617	2.60668	0.752425	1.90648	4.81436	-0.419053	-0.547495	-0.415477	-0.381057	-0.573924	-0.774071	-0.175838	-0.0209699	-0.777729	-0.218865	0.147977	-0.0915663	-1.01246	-0.756565	-0.242048	-0.014766	-0.0335967	-0.272399	-0.91545	-0.688942	-0.722669	0.181558
A_32_P116556	ZNF469	chr16	q24.2	0.739861	-0.542984	0.0144783	-0.197242	0.510133	0.835305	0.575908	0.506165	0.739861	0.362763	0.818222	0.180972	1.02601	0.833347	1.34206	0.606171	0.975857	0.387759	0.5423	0.768247	0.351232	0.7299	1.20857	0.00747972	1.38503	1.80504	1.5964	1.56467	-0.402114	-0.158182	-0.121197	-0.610513	-1.41365	-1.11835	-2.21487	-0.767763	-1.67364	0.14046	-1.09318	-0.500995	-0.721933	-1.734	1.06905	0.327264	-0.442986	-1.18332
A_23_P156025	IRX2	chr5	p15.33	0.735455	-1.16742	0.528164	0.912939	1.03882	0.395569	0.793073	0.708123	0.735455	0.682963	0.576025	0.39029	0.65485	0.662136	0.630522	0.493787	0.766295	0.814722	0.640629	0.94216	0.767442	0.401296	0.795088	0.599889	0.993781	0.678451	1.06733	1.05112	-1.77252	-1.49408	-1.66396	0.345811	-1.66722	-1.67315	-1.71191	-1.72795	-1.67048	-1.42156	-0.101186	0.203947	0.516532	1.28586	-1.0887	1.54381	1.25196	-0.732121
A_23_P110266	C4orf31	chr4	q27	0.733963	-0.633781	-0.526848	0.682754	1.33394	1.01994	0.543637	0.815133	0.00998963	0.186422	0.479975	1.17222	0.751797	-0.560882	-0.483346	1.02108	-0.113703	0.270748	0.733963	-0.426552	1.81135	2.27727	2.10318	1.5666	1.7328	1.9582	0.0268839	-0.197351	-1.08106	-0.87631	-1.25924	0.435092	-0.30907	0.798847	-1.00864	-0.492131	1.14305	-0.0564544	0.626929	1.28875	2.16484	-0.569455	0.953758	-1.39817	-1.14582	-0.547513
A_23_P320705	CRYGD	chr2	q33.3	0.732564	-0.934472	-0.0409262	0.648843	1.42315	0.732564	0.657022	-0.20957	1.0723	-0.144582	0.592877	-0.302734	0.411914	1.2449	1.28918	1.33441	1.40536	1.04006	1.01364	0.732544	0.544904	0.448792	0.715856	1.0947	1.66113	1.69662	1.45431	0.182019	-1.19749	-1.08096	-0.847544	-1.22169	-1.25709	-1.17646	-0.846141	-0.719406	-1.27213	-1.21993	-1.10366	-1.08816	-1.29299	-1.35019	-1.2553	-1.18347	0.455025	-1.28987
A_23_P259901	TKTL1	chrX	q28	0.732105	-0.724272	-0.443442	0.550019	0.809264	-0.457895	0.732105	0.89396	-0.685163	0.42834	1.64727	2.39452	0.556367	-0.316788	-0.97653	1.1107	1.0167	-0.164443	3.08009	0.577567	1.58832	1.62696	0.0445621	1.96669	1.60712	1.96515	-0.121836	0.943737	-1.09173	-1.13095	-1.2343	-0.598319	-0.565131	-0.664428	-0.99958	-0.65895	-0.872529	1.49034	0.937476	0.67083	-0.579774	1.59346	-0.567021	-0.852431	-0.980157	-0.514629
A_23_P157299	AEBP1	chr7	p13	0.732033	-0.184961	-0.0540235	0.30557	0.417183	1.28587	1.00693	1.56198	0.859321	1.7528	0.915364	1.33789	0.78299	0.531419	0.31174	0.536991	0.946013	0.0662007	0.0973715	-0.41422	1.80759	1.101	0.732033	0.524403	0.396676	1.18572	-0.334555	0.208378	0.109286	-0.194297	-0.0679005	0.385973	-0.799052	-1.41142	-3.72641	-0.337063	-0.484376	0.755915	1.11917	-0.175624	0.0542172	-0.957938	-0.052342	-0.259778	-0.128649	-0.897626
A_23_P73632	NR0B1	chrX	p21.2	0.728052	-0.915959	0.0424358	0.166271	0.0289295	0.543315	0.696789	0.830895	0.628575	0.518699	0.802854	0.806138	0.0577831	0.927613	1.14093	1.57861	1.31823	0.856563	0.993707	1.04065	0.728052	0.42397	1.07165	0.385866	0.500516	0.346847	0.704452	1.11638	-1.31374	-1.47656	-1.47218	-0.821814	-0.27755	-0.834003	-1.3272	-0.997916	-0.960871	-1.34603	-1.33635	-0.151124	-1.20421	-1.31652	-1.27845	-1.46244	-1.46181	-1.52624
A_23_P34345	VCAM1	chr1	p21.2	0.727643	-0.350787	-0.344659	0.59361	0.533459	1.00745	1.21102	0.631489	1.22366	0.927073	0.874522	1.31335	1.27391	0.702382	0.399213	1.28881	0.0551111	-0.0621163	0.754	-0.584162	0.645579	1.52804	1.32456	1.22063	0.727643	1.26891	0.548152	0.222653	-0.255026	-0.928582	-0.802365	0.503593	1.1823	0.510067	-0.826984	0.161822	0.39983	-0.361531	1.41448	0.273968	-1.75575	-1.37483	-1.68376	-1.55914	-1.89052	-0.939448
A_23_P356554	BAG2	chr6	p11.2	0.726039	-0.324901	-0.16264	0.888675	1.42504	0.660872	0.732728	0.530474	1.12786	0.750742	0.596848	1.09242	-0.0819116	0.441772	0.514256	1.01856	0.130852	-0.636649	0.71152	0.0753887	0.278928	1.28826	-0.447082	1.29597	0.866296	0.726039	1.71721	0.801948	-1.00272	-1.20879	-1.23035	0.146198	-1.38185	-0.87766	-0.222425	0.522929	-2.39046	-0.351507	0.646297	-0.157534	-0.16264	1.94976	1.99798	-0.0466567	-2.67799	-1.77322
A_23_P121657	HS3ST1	chr4	p15.33	0.725725	-0.55723	-0.0757037	0.54923	0.955421	0.636218	0.800145	0.325958	1.23902	0.588541	0.897919	1.03951	0.853501	0.725725	-0.194485	1.39271	0.668701	0.602731	-0.124555	0.26981	1.33842	1.60188	1.67847	1.61154	1.25907	1.70012	-0.325211	0.253071	-0.456646	-0.309118	0.136138	-0.204689	-0.509312	-0.302908	-2.35403	-0.768672	-1.43524	-0.895129	-0.284051	-0.233468	-0.576624	-2.37764	-2.03471	-1.25936	-0.888274	-0.679291
A_24_P150160	FADS2	chr11	q12.2	0.724433	-0.204299	-0.00221802	1.73993	1.91741	1.36073	1.28273	1.20044	-0.0136335	0.839207	-0.184251	-0.397028	0.337367	0.217427	0.724433	1.17762	0.110768	-0.462184	0.391081	0.236744	-0.0153676	1.21582	1.13271	1.11402	-0.013789	0.134822	1.46666	1.24933	0.475453	-0.435391	-0.556578	-0.236323	0.989527	-0.172276	-1.67778	-3.16956	-0.472332	-2.10215	-1.66572	-0.317384	-0.388305	0.400975	-1.66477	-1.206	0.115549	-1.52478
A_23_P392928	TSPAN33	chr7	q32.1	0.722824	-0.250432	-0.384493	1.62821	1.08145	1.22867	1.34536	1.39778	-1.20506	0.658893	-0.406946	0.722824	0.403068	-0.123846	0.755409	1.06514	0.816222	-0.196213	-0.20443	-0.040948	1.5712	2.04028	-0.23842	1.15001	0.565597	0.660516	0.00189286	1.13455	-1.19177	-0.448857	-0.980819	0.0853752	-0.0833263	-0.637383	0.385383	-2.25829	-0.768252	0.47294	-0.219551	1.63976	-2.15899	-2.39057	2.05217	-0.248097	-1.90651	-0.628294
A_32_P106376	VGLL2	chr6	q22.1	0.722588	-0.601844	-0.596058	-0.62602	1.56001	0.336946	1.8091	0.734502	-0.788384	1.77781	-0.603967	1.49822	-0.656206	1.91787	-0.498003	-0.568861	2.62319	1.55788	0.0823167	3.31377	0.865262	0.46526	0.366117	2.01242	-0.692633	-0.589409	0.722588	1.11242	-0.57061	-0.601521	-0.728414	-0.451953	-0.564108	0.382264	1.2231	-0.740621	-0.699738	-0.567844	-0.492568	0.548405	-0.698754	0.435436	-0.602167	-0.651007	-0.509268	-0.623373
A_24_P319923	MYLK	chr3	q21.1	0.721669	-0.358366	-0.120541	1.82594	1.75743	1.68007	0.721669	1.72321	1.9336	1.00518	0.0266146	1.36036	0.677997	0.046891	0.876513	-0.297151	0.97622	0.331633	0.804818	-0.420332	1.23731	0.0371348	-0.510978	-0.38202	-0.0233836	0.0211954	0.0659233	0.368934	-1.03861	-0.0603242	-1.01833	-0.919087	-1.4759	-0.258519	-0.962272	-0.602771	-0.439753	-0.423825	-0.972962	-0.594973	0.0796286	-1.90591	-2.69359	2.01921	-0.74327	-0.616389
A_24_P260443	THBS4	chr5	q14.1	0.721025	-0.752583	0.718365	0.756868	0.887522	0.946817	0.762031	0.798026	0.121736	1.12088	0.718365	0.908185	1.16049	0.674378	0.385695	0.264169	0.333344	0.542257	0.70565	0.270495	0.947672	0.721025	0.292696	1.26604	0.766041	0.830254	0.25871	-0.67053	-0.585976	-0.939597	-0.106723	-0.0781553	-0.712949	-0.89527	-0.764725	-0.697886	-1.8068	-1.22089	-1.28545	-0.675401	-1.38315	-1.53702	-1.53368	-2.23143	-0.836202	-1.08081
A_23_P167805	B3GAT2	chr6	q13	0.720817	-0.713224	0.203389	1.88859	2.28189	1.00397	0.747862	0.720817	-1.07339	0.991691	0.856362	-0.239494	-0.795787	-0.447658	-0.546879	0.833659	0.0873446	-0.74097	0.824066	-0.312163	0.191542	1.34681	0.717554	0.210033	0.479264	1.12886	2.08899	1.84737	-0.837772	-1.32804	-1.22997	-1.36473	-0.744769	-1.47188	-0.675514	-1.22924	-0.836989	-0.813534	-1.07831	0.556683	0.759597	1.76425	-1.36546	-1.58102	-1.32539	0.85029
A_23_P328740	NEURL3	chr2	q11.2	0.718522	-0.351873	-0.138443	1.67158	1.91136	0.903366	1.44033	1.03653	0.961706	0.951265	-0.0525595	0.957029	0.517486	1.69457	0.506742	0.657389	-0.457916	0.285757	-0.00582285	-0.817741	-0.850952	0.718522	0.00478828	-0.207007	0.0348513	0.372638	1.30057	1.45872	-1.33351	-1.36999	-1.33658	1.01258	0.571823	-0.993488	-1.29798	-0.54563	-1.8003	-0.114262	0.735356	0.355459	-1.25354	-1.70889	-0.439417	-0.868743	1.35564	-1.08227
A_23_P50928	C1QL2	chr2	q14.2	0.717084	-0.855396	0.211722	0.0984721	0.970255	0.415413	0.860119	1.4497	0.996336	1.09577	0.950175	1.40308	1.17781	0.480162	-0.044573	0.838435	0.892915	0.717084	0.76265	1.35437	0.434928	-0.20621	-0.821919	0.349191	-0.222865	-0.874714	-0.527029	0.214434	-1.1724	-1.23771	-0.966495	-1.11969	-1.07916	-1.32301	-1.06217	-0.741135	-1.44492	-1.22141	-1.16585	-0.354937	-0.927678	-0.614058	-1.14446	-1.20579	-1.20203	-0.530646
A_23_P356154	WDR49	chr3	q26.1	0.715871	-0.517668	-0.259824	1.00363	0.835578	0.715871	0.704223	-0.197285	0.0450775	-1.00973	0.0932397	0.624146	0.289186	0.278091	0.933456	1.20164	0.989818	0.176718	0.226097	0.650192	2.61608	1.58156	0.811068	1.24789	0.850502	1.47363	1.71083	-0.303538	-0.413392	-0.669256	-0.843123	-1.03431	-1.40156	-0.762751	-0.477429	2.11324	-0.935989	-1.38078	-0.259824	-0.647997	-1.436	-1.53005	-0.305731	-1.53094	-0.0468432	-1.15137
A_24_P253454	RGMA	chr15	q26.1	0.714918	0.0117014	0.0955413	1.08659	1.35702	0.963178	0.904892	0.7597	0.562714	0.589301	0.767875	0.136001	0.46829	0.492753	0.0343735	0.57971	0.41946	-0.269141	0.79188	-0.13013	0.720103	0.456608	1.10385	0.133919	0.792772	1.11831	0.714918	1.00327	-0.79964	-2.38363	-1.29462	0.537742	0.737195	0.200591	-1.6756	0.528999	0.00723711	-2.22917	0.0955413	0.75488	-1.07302	0.0385777	-2.78355	1.00944	0.309393	0.158606
A_24_P179467	SLC1A6	chr19	p13.12	0.71343	-0.689852	0.1003	-0.114606	0.793934	0.160101	0.703436	0.468634	-1.3354	0.148049	0.140919	-0.118001	0.736742	1.40987	1.36803	1.24609	1.12982	0.71343	0.931811	1.32858	0.662496	0.972212	0.871868	1.1963	0.804061	0.188945	-0.0545786	0.428952	-1.30931	-1.62582	-1.20981	0.158398	-1.23978	-0.366981	-1.27048	0.0299745	-1.7177	-1.49204	-1.49684	-0.388688	2.13474	0.1003	-1.58679	-1.50629	0.487046	-1.50421
A_23_P69339	ACAA1	chr3	p22.2	0.713255	-0.493114	-0.134939	1.33404	1.03896	0.79497	0.427242	0.444385	-0.438391	0.23811	-0.598472	1.13006	1.14593	1.07932	0.649631	0.705873	0.877207	0.618532	0.536357	0.175019	1.10948	1.84889	2.23047	1.86594	0.0466167	0.586498	1.14121	0.713255	0.326772	-0.574042	0.0347061	0.444674	-1.23475	-1.24046	-0.350356	-0.543863	-0.278519	-1.35514	-0.83783	-0.693558	-0.99804	-1.16285	-2.83104	-0.442364	-2.04382	-1.17466
A_32_P123255	ANKRD58	chrX	q24	0.713121	-0.370909	-0.412261	-0.306589	0.560552	1.61529	0.260174	1.57644	-0.6859	-0.121151	-1.4266	1.37885	1.64178	1.57256	0.748011	0.0188058	1.57291	2.1306	0.709126	-0.0427159	1.326	1.7104	0.951781	0.424818	-0.72513	0.034039	0.272729	0.713121	-0.100136	-0.33416	0.186903	1.12156	-1.13484	-0.208945	-1.71679	-1.43003	-0.503012	0.178271	-1.46165	0.222668	-1.2127	-1.29084	0.225217	-0.698931	-0.81911	-0.407659
A_23_P170839	SEPT2	chr2	q37.3	0.712613	-0.334137	0.267167	1.43662	2.15377	0.443138	1.40417	0.299602	0.35382	0.996073	0.578332	-0.0704682	0.712613	1.02868	0.203953	0.970048	-0.194609	-0.00527486	0.784516	0.881949	-0.401836	1.08066	1.059	0.714382	0.155312	0.235501	0.64229	2.02593	0.479586	0.259742	0.311017	-0.41727	-0.353203	-0.158254	0.390611	-1.15702	-2.71914	-1.06583	-0.352585	0.0984278	-1.34907	-0.427263	-0.231106	-0.865424	-0.287082	0.69881
A_24_P305933	TMCC3	chr12	q22	0.711462	-0.413991	-0.200755	0.347608	2.02129	0.9246	1.10625	1.05004	-0.875255	0.913162	0.730752	0.0157402	0.081622	-0.00892545	1.70764	1.09164	1.06363	0.711462	0.148931	-0.0805785	0.200891	0.96995	0.356171	2.15226	-0.386732	-0.306952	1.5926	1.64344	-0.991014	-0.377672	-1.49256	-0.45031	-0.962142	0.413582	-2.03723	-1.40386	-0.16118	-1.26459	-1.62909	-0.490473	-1.01685	1.26827	-2.2748	1.02556	-1.68781	-0.0212206
A_23_P302005	STON1	chr2	p16.3	0.710171	-0.359945	0.00318148	1.08823	1.70006	0.701381	0.702835	0.766849	0.921854	1.06934	0.875894	0.647878	0.630083	0.646342	0.425017	0.928875	0.359494	0.313032	-0.116339	-0.313524	1.17093	0.710171	0.636747	0.925553	1.10273	1.10998	1.38351	1.00155	-0.803568	0.301862	0.12243	0.819898	-0.894074	0.519948	0.342768	1.40797	1.16997	-0.0918198	1.1256	0.162001	-0.857311	-1.91595	0.921554	-0.407964	-2.31327	-1.40022
A_23_P137381	ID3	chr1	p36.12	0.709682	-0.414976	-0.0450995	0.957755	0.693042	1.0713	1.44913	1.02542	0.46144	0.265152	-0.00324365	0.105694	0.911777	1.29349	1.04948	1.39386	0.618808	0.233539	0.905154	0.123553	0.709682	1.2483	1.76796	0.563405	0.28932	0.371159	-0.0174484	0.650777	-0.782077	-0.323003	-0.317013	0.350541	-1.00241	-1.36315	-3.15481	-1.46951	-1.26541	1.3986	0.923967	1.39226	0.229239	-1.67786	-1.84718	-2.3448	-0.478103	-0.35185
A_23_P217326	FHL1	chrX	q26.3	0.708846	-0.275025	-0.210237	0.655323	1.52734	0.82732	1.4974	0.655535	-0.00559509	0.787465	0.435058	0.89825	0.29135	0.176439	0.644908	1.39438	-0.190165	0.0843398	0.708846	1.10477	0.938019	1.25737	0.978767	-0.0802165	0.516264	1.28017	0.151716	0.423415	-1.00882	-2.21813	-1.65127	1.06811	-0.208593	1.66024	-0.352825	-2.46013	-0.63717	-2.86401	-0.550602	0.581484	-1.89277	-0.783194	-1.33024	1.84966	-1.5053	0.0478254
A_23_P365785	GRHL1	chr2	p25.1	0.70777	-0.677352	-0.508458	0.789483	0.551328	0.357988	0.473951	0.434506	0.47443	1.028	0.207334	0.326615	-0.53273	0.767135	1.18233	2.05761	0.500975	-0.0417642	0.57931	0.70777	0.841935	0.819479	1.84594	1.28807	0.319571	0.769884	0.707953	1.93624	-0.700431	-0.654274	-0.889205	-0.125117	-0.72821	0.811001	0.222378	1.05292	-0.785736	-0.794403	-0.508458	1.0405	-1.8443	0.0544188	-0.52048	1.80897	0.331827	-1.5834
A_23_P429449	NKD1	chr16	q12.1	0.706597	-0.536044	0.1038	0.718258	2.15489	-0.645647	0.946298	0.348567	-1.1787	-0.457287	0.897952	-0.451105	1.32785	0.244861	1.03733	1.20467	0.706774	0.836846	0.55538	0.417864	0.303511	1.03566	0.706597	0.838824	1.78322	2.875	0.252188	0.403535	-0.694306	-1.1777	-1.62822	-0.197011	-0.445413	-0.93288	-0.893154	-1.86545	-1.42614	-1.43296	-1.2712	0.0307932	-1.97898	1.21794	2.08066	-1.824	0.00052483	-0.125551
A_24_P126210	MRAP	chr21	q22.11	0.704983	-0.678706	-0.527164	3.20438	0.292016	0.815053	2.62803	2.03398	-0.663511	1.5463	-0.487672	-0.0759554	-0.855556	0.297691	1.70185	0.00529574	0.653299	0.15779	2.18999	-0.442622	-0.029988	1.29014	0.450025	-0.314806	0.873755	1.5643	0.704983	1.01106	-0.716095	-0.972361	-0.929994	1.58009	0.475618	-0.697125	-0.703055	0.017181	1.82452	-1.08118	-0.701219	-0.243211	-1.09409	-0.938951	-1.06062	1.67952	-0.394569	-1.07137
A_24_P270728	NUPR1	chr16	p11.2	0.701404	-0.269077	0.125408	0.570385	0.395022	0.917391	0.929063	0.793153	1.40789	0.727281	0.619722	1.51001	0.170359	1.25163	0.472493	1.41741	1.39597	0.359417	-0.025287	-0.516491	1.36744	0.575644	0.246585	0.636922	0.701404	1.16644	-0.77955	-0.31159	-0.817616	-1.58542	-1.41167	0.810396	-0.205778	0.107341	-0.332377	0.285071	0.657107	-0.756195	0.555205	0.507983	1.484	-0.712148	-2.10354	-0.726611	-1.30857	0.639501
A_23_P41194	LRRC34	chr3	q26.2	0.699852	-0.195209	-0.0878883	-1.33267	1.20407	0.640044	1.14103	0.0560597	0.94882	-0.383134	-0.237629	0.95223	0.491019	0.721573	0.510049	0.182066	-0.604689	-0.384879	0.319984	-0.225404	0.699852	1.40059	1.3677	0.356412	1.34353	2.05613	2.2103	1.24894	-0.513789	-1.18817	-0.0736851	0.538668	-0.841757	-1.65798	-0.25807	-1.24181	-0.871739	0.0695109	0.801459	0.17491	-2.05056	-0.895935	-2.61014	-0.132348	0.130427	-1.83446
A_23_P151598	CPNE6	chr14	q11.2	0.698436	-0.806858	-0.37968	1.43917	1.5302	2.15036	0.698436	1.80097	-0.248305	1.0157	0.191276	0.913602	0.175155	-0.00980307	0.103572	-0.00537381	0.815063	0.305446	0.603837	-0.485862	1.81305	0.761251	0.566238	0.54834	-0.148715	-0.132568	0.856166	1.1753	-0.416739	-1.08937	-1.3387	-0.597875	-0.579577	-1.30748	-1.4133	-0.718089	-1.31541	-0.962961	-0.582503	0.652533	-0.93056	-1.26289	-0.986401	-1.01529	-0.910443	-1.00565
A_23_P77103	SORD	chr15	q21.1	0.69836	-0.502276	0.0194629	1.38961	1.56335	0.0471784	1.17479	0.525613	0.666789	0.69836	0.251348	-0.296785	0.362508	-0.454582	1.00553	0.957393	1.87766	0.793047	1.01796	1.1743	1.49251	0.432152	-0.114468	0.597758	0.382497	0.305821	0.649219	0.959919	-0.963651	-0.484724	-0.810737	-0.622476	-0.467577	0.0172565	-0.519828	2.39006	0.0194629	-0.269326	0.498155	0.139006	0.753211	-0.893911	-1.50282	-0.914033	1.36142	-1.40553
A_23_P47086	KRTAP5-8	chr11	q13.4	0.698227	-0.650735	-0.0116086	1.0642	0.546192	1.74904	0.378101	0.589365	1.31075	0.634825	0.657049	1.21445	0.698227	1.29703	0.5888	0.746594	0.489273	0.918087	-0.806104	-0.953433	0.0663966	1.23212	0.418116	0.957354	0.845115	-0.113171	0.833011	1.419	-0.654845	-1.70275	-1.98485	1.7344	-1.64422	-0.90884	-2.04261	-0.491274	-1.91931	-1.77279	-0.314627	-0.0461428	-1.01375	-0.483195	-1.38611	-0.217913	-0.785683	0.117048
A_23_P133457	IRX1	chr5	p15.33	0.697891	-1.13149	0.385962	1.00496	0.613672	0.264296	1.67489	1.22287	-0.255933	0.843725	0.797749	0.354521	0.503687	1.41152	0.440576	0.639095	0.697891	0.313715	1.37997	0.829497	1.24939	0.267712	0.779051	1.10456	1.26772	0.411723	0.0742476	1.14354	-1.71124	-1.44883	-1.6743	0.239723	-1.32702	-1.72888	-1.33807	-1.66163	-1.43156	-0.729685	0.33531	0.851663	0.376755	1.59456	-1.31123	1.17563	1.21445	-1.3043
A_23_P7791	OGFRL1	chr6	q13	0.697703	-0.595756	-0.0122024	1.88145	1.72592	1.30896	0.349032	0.841022	0.331626	0.248826	1.50436	1.57575	0.336895	0.247254	0.18888	0.87315	1.45434	0.40368	0.746984	-0.433365	0.318781	1.18771	0.712767	1.28929	-0.365022	-0.245735	0.740823	0.697703	-0.863991	-0.182178	-1.62856	-1.01279	-1.15901	-0.251304	-1.43202	0.604285	-0.957241	-0.772212	-0.462449	0.970791	-1.15027	-0.205604	-1.21017	-1.21366	-2.1865	0.613333
A_23_P81392	WWC1	chr5	q34	0.694036	-0.106535	0.058252	0.906279	0.89442	1.1616	0.868021	1.01131	-0.446968	0.179841	-0.43371	0.285611	0.231896	0.311884	0.905484	0.889582	0.378061	0.134995	0.487806	-0.233532	-0.0721999	1.18218	1.1333	0.46813	0.337673	0.694036	1.4542	1.37251	-1.29297	-2.28259	-1.31652	-0.108939	0.64285	0.233735	0.104517	-0.404079	-0.672605	-2.70221	0.360474	0.663394	-0.555374	-1.93563	-3.06857	-0.631786	-0.232009	-0.917196
A_32_P11701	ALDH1L2	chr12	q23.3	0.693145	-0.919545	-0.472262	-1.04268	0.74654	0.648447	0.621585	0.436	1.05065	0.666067	-1.15662	0.958398	0.693145	1.04005	0.987009	2.18204	0.813674	0.544315	0.37561	0.294007	0.441345	0.540576	1.33064	0.816188	0.954323	1.27917	0.783872	0.582546	-1.14213	-0.981692	-1.15145	-0.403881	-0.87487	-1.12274	-0.845981	-0.631051	-1.01182	-1.03189	-0.942	-0.322428	0.825271	-1.85464	-1.17358	-1.84141	1.843	-1.36965
A_23_P102950	RSPH1	chr21	q22.3	0.691332	-0.520656	-0.0497706	0.586793	0.898455	0.35666	0.870168	0.323424	-0.184434	-0.196446	-0.342692	0.971189	-0.215459	0.897938	0.691332	0.386798	0.882719	0.16455	-0.0252389	0.643175	1.58371	2.30061	1.58305	1.01964	1.49157	2.04596	1.93418	-0.10272	-1.49622	-1.64841	-0.728821	0.112807	-1.41245	-0.439051	-1.85549	-0.521075	0.49564	-1.18361	1.0971	0.879653	-1.8845	-0.821543	0.553497	0.809791	0.424477	-1.43013
A_23_P304489	FAM19A5	chr22	q13.32	0.68827	-0.648885	0.27288	0.664179	0.941627	0.238553	0.67947	0.465234	0.0616172	0.327632	0.0824583	-0.25839	0.886291	0.731507	0.671953	0.691248	0.68827	0.838664	0.534036	0.879148	0.94481	0.382965	1.01362	0.197323	0.867532	1.10477	0.581826	0.899976	-0.943969	-1.74577	-0.845334	0.429126	-1.99913	-1.40301	-0.727214	-0.575725	-1.94687	-1.45981	-3.27972	0.257447	-0.459929	1.49897	-0.781785	0.561365	-1.16739	-1.82705
A_23_P161647	PC	chr11	q13.2	0.688218	-0.426393	-0.155386	1.43891	1.0382	0.525	0.450225	0.758047	0.412296	-0.0558627	-0.741712	0.688218	0.222034	-0.280435	0.769502	1.29077	1.08919	0.067681	0.119088	-0.433959	2.10447	2.05221	1.50202	0.744632	0.638543	1.45987	0.560785	0.962119	0.556512	0.36672	0.195622	1.06342	-0.329569	-0.887041	-1.57715	-1.06482	-0.188456	-1.15695	-0.386593	-0.229597	-2.67487	0.0658782	-1.02643	-0.523216	-2.27602	-0.130274
A_23_P77908	SLC47A2	chr17	p11.2	0.685129	-0.812526	-0.503484	0.521778	-0.141691	0.897311	1.69001	0.685129	1.04046	1.24016	1.00258	1.89701	0.53047	0.96514	0.431406	1.13956	0.911085	-0.245137	-0.0329886	0.0273655	2.32808	0.69273	0.376285	-0.508616	0.637049	0.80801	0.241382	-1.09814	-0.817267	-1.26145	-0.574094	2.50327	0.409362	-0.0886469	-0.807785	0.380666	1.04115	-1.21331	0.0212555	0.890092	-0.987304	-1.03417	-1.2519	-0.900726	0.188687	-1.338
A_23_P305977	GRAMD2	chr15	q23	0.683649	-0.683035	0.0755504	1.08475	1.30321	1.04226	0.972376	1.00907	0.303522	1.08453	0.913746	-0.794689	0.815458	0.451977	0.683649	0.789107	-0.377816	-0.0961721	0.0450487	-0.314298	0.0815643	0.0169718	-0.998341	0.0755504	0.618766	1.02854	2.24259	1.93249	-0.358309	-0.896313	-0.307834	-1.58168	-1.51984	-1.29688	-1.42833	-0.84209	-1.28168	-1.18977	-1.24448	-1.01176	-1.53392	-1.44022	-1.61037	-0.986586	-0.94563	-0.415643
A_23_P259251	KCND2	chr7	q31.31	0.683433	-0.358417	0.408201	0.593535	0.971786	0.72653	0.835272	0.683433	-0.285093	0.456198	0.708259	0.0301721	0.128872	0.259202	0.878572	0.580774	0.703044	0.472973	1.14239	1.27333	0.432376	0.887268	1.05886	0.408201	0.721403	0.321494	0.545619	0.826165	-1.0811	-2.43624	-2.27858	-1.97187	-1.1129	-1.26059	-2.39773	-1.09299	-0.724609	-0.247168	-1.71083	-0.272071	-2.26982	-1.61907	0.28852	-2.53138	0.753183	-0.518097
A_24_P8888	C2orf27A	chr2	q21.1	0.682979	-0.488229	0.204261	0.224118	0.621461	-0.070436	0.151511	0.149213	0.193993	0.682979	0.236678	-0.525089	0.437109	1.86759	1.92305	1.09305	1.54008	0.203564	1.38754	0.484137	0.575317	1.02005	1.03474	0.721332	1.29246	0.906106	1.50061	0.850708	-1.3696	-0.96736	-0.0253443	-1.90113	-1.1815	-2.03693	-0.943019	-1.39715	-2.13238	-0.570947	-0.37528	-0.287266	-1.4606	-2.20031	-1.14207	-1.7779	-0.405511	-1.74045
A_23_P211926	WNT5A	chr3	p14.3	0.681918	-0.859035	-0.0555496	0.490395	1.3887	0.668985	1.03131	0.681918	0.581653	0.980456	0.862735	0.634492	0.346508	0.23725	0.692211	0.63291	-0.104378	-0.0464701	0.758	-0.269549	0.0980816	1.07028	2.33478	0.931787	1.71737	2.20167	2.16649	1.44414	-0.78691	-1.14962	-1.16232	-1.03004	-0.942765	-0.485156	-0.294157	-1.07446	0.340687	-0.535244	-0.038268	-0.0729505	-0.762545	1.94003	0.173067	-0.0431994	-1.497	-1.59396
A_24_P108784	SOX10	chr22	q13.1	0.678588	-0.632508	0.340815	0.445172	0.399459	0.485356	0.678588	0.512279	0.0483821	0.538988	0.162709	-0.104234	0.451047	0.779893	1.08477	1.05107	1.04338	0.85296	0.913066	0.909495	0.674824	0.611312	1.16123	0.593562	0.795047	0.974564	0.535131	0.94632	-0.594158	-1.70573	-1.68545	-0.654278	0.244138	-0.610739	-1.66551	-1.60811	-1.61575	-0.0507608	-1.63415	-1.05632	-1.14379	-1.74064	-1.60365	-1.66742	-1.63764	-1.69506
A_23_P110196	HERC5	chr4	q22.1	0.67664	-0.420651	0.354788	-0.105201	0.822569	0.757456	0.397206	0.112431	-0.0929222	0.570578	0.617989	0.292812	-0.0528789	0.741203	0.879562	1.31717	2.03308	1.18864	0.67664	1.03893	-0.414532	0.957334	0.599743	0.366339	0.7355	1.04965	-0.446239	-0.115507	-0.631581	-1.28425	-1.10243	0.92112	-1.93587	-0.668975	-1.12817	0.349869	-1.70629	-1.49525	0.778134	0.473514	-0.437285	1.57554	-1.41197	-1.50296	-1.33424	0.540327
A_23_P333650	RAD9B	chr12	q24.11	0.675611	-0.417403	-0.641337	0.648252	1.38069	0.428634	0.675611	0.435632	1.02642	-0.331515	-0.889084	2.21396	-0.456082	0.696221	0.234159	2.87529	0.16386	0.862919	0.00762352	0.792164	0.331965	2.55918	2.11264	1.4729	0.214238	0.973011	1.6773	0.499729	-1.19586	-0.653893	-0.989311	-0.892746	-0.0431325	-0.801522	-0.999458	-0.8995	-1.32702	0.0987372	-1.26486	-0.394751	-0.441309	0.712703	-1.37741	1.02798	1.73381	-0.119926
A_23_P131846	SNAI1	chr20	q13.13	0.668431	-0.749256	-0.0420978	1.25276	1.51656	0.668431	1.77928	1.42299	1.96355	1.03805	1.55821	1.32526	1.78452	1.8354	-0.67895	0.554124	-0.468977	1.22516	-0.71479	-0.0385401	-1.05936	0.354738	0.171326	-0.0420978	-0.113881	-0.636902	-0.635801	0.791339	-0.382132	-0.152618	-0.880142	-1.46113	-1.16646	-0.966048	-0.927797	-0.390971	-1.11958	0.695257	-0.0576373	0.446996	-0.61904	0.32256	-1.38923	-0.771281	-1.22846	-1.26357
A_23_P147025	RAB33A	chrX	q26.1	0.668358	-0.87358	0.178811	-0.023548	0.0496865	0.30625	-0.0143899	0.0845639	0.1034	-0.358095	-0.0624301	-0.698885	-0.373554	0.368006	1.80865	1.30988	1.62164	0.668358	0.961274	1.22189	0.685757	0.576239	1.00167	0.960772	0.931479	0.700929	1.03591	1.19518	-1.23889	-0.876188	-1.16179	-1.57132	-0.870972	-0.877074	-1.93297	-2.13298	-0.750677	-1.66209	-1.17876	-0.416191	0.195999	-0.245099	-0.359133	-2.65007	-0.565594	-1.7231
A_23_P411723	PLAG1	chr8	q12.1	0.667981	-0.733815	0.67738	0.667981	0.472929	0.881898	0.31312	0.588951	0.791662	0.961669	0.899453	0.828447	0.400271	0.854458	0.355812	0.630578	0.170415	0.404063	0.434736	0.350535	0.77962	0.763985	0.950525	0.740293	1.2321	1.40715	0.853357	-0.00168122	-0.652333	-1.09014	-0.327443	-0.745015	-1.63972	-1.08597	-0.917926	-0.0145756	-0.97843	2.0043	-1.53533	-1.06251	0.995837	1.08618	-0.871079	-1.68856	-1.69371	0.969321
A_23_P502731	PRRX1	chr1	q24.2	0.664993	-0.389458	-0.177318	1.69744	1.32974	1.39529	2.07978	1.03828	1.04692	2.12827	1.02247	0.76659	0.538129	0.559505	0.607032	0.21019	0.144438	-0.384629	0.811807	0.664993	-0.13608	0.293284	0.477222	0.412203	-0.41946	0.222412	1.58345	1.39168	-0.378788	-0.400129	-1.11723	-1.88746	-1.14387	-1.90152	0.678073	-1.15479	-2.18183	-0.332669	-0.0949232	0.537641	-1.45229	-0.144	0.598089	-0.0152289	-0.863387	0.481733
A_23_P11806	COL11A1	chr1	p21.1	0.662786	-0.547338	0.199147	0.662786	0.372389	0.784642	0.164611	0.320784	0.0355808	0.531867	0.57529	-0.17343	0.135535	0.934849	1.60081	-0.0840701	1.11263	-0.0117365	1.34543	0.680479	0.0912608	0.420805	0.741397	0.738411	0.769294	0.950926	1.2296	1.15954	-1.48154	-1.68962	-0.899958	-0.796634	0.500521	0.877691	-0.518729	-1.61739	0.515722	0.122153	-1.94032	1.22357	-1.20967	-1.92464	-1.03785	0.151049	-2.34774	-1.44747
A_24_P397204	KCNIP4	chr4	p15.31	0.662108	-0.773612	0.149104	-0.214839	0.644651	1.03282	-0.173675	0.455327	0.257181	0.938642	0.75017	0.144409	0.838954	0.85421	0.810088	0.789172	0.945959	0.185034	0.398059	0.827096	0.529782	1.79212	0.662108	0.836702	0.663865	0.841529	-0.391406	-0.937299	-1.168	-1.09342	-1.68247	-0.415755	0.482458	0.0660267	-0.742388	-1.42085	-0.24753	-1.32413	-1.31752	-0.00556134	-1.44241	-0.606993	0.497287	-1.80178	-1.27648	-0.253173
A_24_P358554	BCAN	chr1	q23.1	0.6619	-0.365703	0.442992	1.12759	1.12051	0.517172	0.878558	0.6619	-0.487375	0.592333	0.357725	-1.05089	-0.0384751	0.637883	0.639629	0.383062	0.75127	0.484192	0.97042	0.810675	0.564255	1.08147	1.18597	0.873046	0.607508	0.785281	1.197	1.195	-0.371877	-0.553466	-1.15039	0.348149	-0.417145	-1.03775	0.0811513	-2.22553	-1.28257	-2.72575	-0.106981	0.910962	-1.79308	-1.09055	-2.55351	-2.78244	-1.4759	-0.80397
A_23_P27846	PLIN4	chr19	p13.3	0.66178	-0.557048	-0.535701	1.97232	0.046425	0.801023	0.67322	1.65551	-0.520148	-0.0103753	-0.842584	0.523243	-0.594252	-0.428975	0.474463	0.0602979	3.24653	0.490782	0.615914	-0.229429	2.8334	0.846299	1.29196	-0.517627	0.835208	1.86123	1.55729	0.66178	-1.26462	-0.505358	-0.608738	0.315997	-0.668737	-1.12226	-0.209931	-0.179392	-0.0950273	-1.11193	-0.22682	0.305931	-0.955288	-0.527121	-0.348969	-0.34047	-0.397409	-0.685027
A_23_P167182	LRAT	chr4	q32.1	0.660412	-0.288783	-0.449744	0.789984	0.838656	0.761261	0.143031	1.08678	0.371026	0.531183	0.458724	0.124313	0.0465881	0.0684835	0.397461	0.337015	0.43749	-0.469639	0.660412	0.141199	0.899141	1.17026	2.5343	0.473061	2.07662	2.45578	1.50526	2.67344	-1.18177	-1.24208	-1.30015	-1.00255	-1.00198	-0.218184	-1.27118	-1.29731	-0.449744	-1.1464	-1.3591	-0.88945	-0.545742	0.150208	0.0695178	1.6353	-0.301089	0.570569
A_24_P365506	FERMT1	chr20	p12.3	0.660211	-0.810944	-0.114706	-0.648796	0.0730634	0.660211	0.281818	-0.0688831	0.037281	0.487885	-0.293467	-0.437107	0.00504147	0.177912	1.53986	1.11568	1.0807	0.360851	0.9828	0.660782	0.108669	1.12464	1.59784	1.20757	1.41954	1.59339	1.5377	1.61612	-1.15077	-1.28547	-1.21833	-1.5323	-0.668226	-1.3257	-1.31805	-0.429651	-1.36354	-1.24526	0.293305	0.43896	-1.32414	-1.3873	-1.4575	-0.813554	-0.808334	-1.25282
A_23_P345808	FAM133A	chrX	q21.32	0.657909	-0.784506	0.290838	0.453381	0.734786	1.00927	0.0419965	1.00017	0.365456	0.530032	0.606756	0.585101	0.00268085	0.826703	0.677007	0.896103	1.11876	0.0473594	0.413974	0.211993	0.427977	1.42347	0.884654	0.290838	0.729387	0.95661	0.325613	0.657909	-1.25194	-1.73034	-1.59873	0.981367	-1.00414	-0.116231	-1.07257	-0.723292	-1.13181	-1.40028	-1.57422	-1.05387	-1.20042	-1.84258	-1.39277	-0.886887	-0.473122	-0.845719
A_23_P9293	TJP2	chr9	q21.11	0.65651	-0.790732	-0.0120941	0.65651	1.0272	0.794856	0.49625	0.636022	0.317605	0.034396	0.726683	0.728556	0.106562	0.35665	1.07723	1.93139	0.535342	0.88964	0.684092	-0.019676	1.5681	1.6655	1.01744	0.947815	0.366662	0.667402	0.417061	0.376058	-1.22376	-1.58666	-1.14077	1.45258	-1.07176	-0.48032	-2.01582	-0.391722	0.419356	-1.24326	-0.0120941	0.516311	-1.57458	-0.99134	-2.4963	-1.82929	-0.821151	-0.760314
A_23_P47077	BAG3	chr10	q26.11	0.655191	-0.589981	0.134905	1.2538	1.48195	1.76885	1.19256	1.74856	1.20964	1.35475	1.74782	1.58659	1.02718	0.655191	0.699917	1.49306	0.391595	0.180169	-0.252811	-0.548096	0.299338	-0.00755505	0.550537	0.525292	-0.319334	0.0866635	-1.23916	-1.16963	0.101595	-0.701803	-0.87019	-1.8684	-1.63666	-0.574472	-1.5165	-0.591765	-1.16299	-0.774594	-1.28249	-0.306229	-1.07936	0.757926	-0.031731	-1.2301	0.0665553	0.52732
A_32_P10083	KIF19	chr17	q25.1	0.655117	-0.781324	0.13389	0.39454	1.33014	0.972294	0.473424	0.604348	-0.365825	0.359559	0.534252	-0.861692	0.941134	-0.393388	0.740201	0.223862	0.215692	0.655117	0.82078	0.739466	1.32557	0.912188	0.258254	0.70236	1.29638	1.20519	2.77626	0.603919	-0.0728467	-1.22265	-0.859559	-0.0635315	-1.90633	-1.89814	-1.85825	-1.0537	-1.47117	-1.75659	-1.16556	-0.285835	-0.525271	-0.254067	-0.820648	-1.41387	-0.556221	-1.35434
A_23_P42168	MDFI	chr6	p21.1	0.653915	-0.667907	0.363924	0.777688	1.17636	0.470772	0.946387	0.812901	-0.453249	1.19376	0.711609	-0.80345	0.587572	1.12536	1.10509	0.558788	-0.0532831	-0.111723	0.758277	0.653915	-0.480827	0.117901	0.357671	1.16187	0.701512	0.150404	1.26317	1.60855	0.651225	0.00440189	-0.5658	-1.7236	-0.340607	-1.04267	-0.247847	-1.15534	-0.935693	0.768409	0.363924	1.16313	-0.519519	0.73186	-2.23787	-0.531171	-1.00084	-1.19158
A_24_P649282	LUZP2	chr11	p14.3	0.652716	-0.506109	0.549049	1.113	1.36201	0.652716	0.65122	0.710184	-0.0279181	0.525781	0.549049	-0.186021	0.174627	0.208433	0.571563	0.513603	0.513416	0.37493	0.868605	0.836205	0.530424	1.38359	1.29033	0.599198	0.764797	0.750928	1.17883	1.42688	-0.518608	-1.68683	-1.75307	-1.25715	-1.80999	-1.53777	-1.59804	-1.74084	-1.69851	-1.68467	-1.66057	-0.0673743	-1.54278	-1.40424	-1.68939	-1.85538	-1.33063	0.739694
A_23_P314145	UST	chr6	q25.1	0.652638	-0.735616	0.270731	1.10512	0.276846	0.35121	1.42906	0.64091	0.799351	0.801728	0.270731	0.357228	0.0990159	0.0795981	0.332375	0.315849	1.16677	-0.342352	-1.31716	-0.892266	0.652638	0.826412	0.965982	0.477378	0.717027	1.38343	1.4189	1.20592	-0.834369	-0.726911	0.266489	0.0119215	-1.30176	-1.38907	-1.03633	-1.26056	-2.33104	-1.75058	-1.18051	0.33526	0.743299	1.73793	0.171886	0.203496	-2.32823	-0.744321
A_23_P106042	CMTM5	chr14	q11.2	0.651857	-0.442479	0.162806	0.377274	0.297573	0.443085	0.0428833	0.651857	-0.649697	0.322785	0.182032	-0.515441	-0.0893834	0.558973	1.40165	0.458737	0.945307	0.830764	0.853976	0.809465	1.2162	0.849667	1.05343	1.64235	0.578365	0.787226	0.867093	1.51107	-1.00567	-1.5491	-0.594748	0.144749	-0.762829	-0.490102	-1.06384	-1.14195	-1.91505	-0.652634	-2.13363	-0.506147	-1.07223	-2.49971	-1.26869	-2.57103	-2.53499	-2.43205
A_24_P391811	DOCK10	chr2	q36.2	0.649986	-0.740535	0.472041	0.477421	0.161976	0.649986	0.428767	0.195817	0.468711	0.835273	0.342774	0.0262045	0.848761	1.32287	0.803525	0.656569	0.932081	0.824938	0.720111	0.865197	0.220357	1.11825	0.646949	0.641328	0.502428	0.850741	0.63261	0.642986	-1.8664	0.0944646	-1.27161	-1.39854	-2.15782	-1.44088	-3.10925	-1.97461	-2.35334	0.192015	-0.699533	-0.56006	-0.285895	-0.193178	-0.860686	-0.137551	0.70466	-1.75628
A_23_P169909	DGKI	chr7	q33	0.649777	-0.689584	0.255668	0.49224	0.430871	1.13536	0.466567	0.250148	0.561015	0.649777	0.44736	-0.967745	0.456495	-0.214161	1.22342	0.655178	0.366385	-0.31539	0.729453	1.0972	0.583606	1.18851	1.18874	0.010904	1.01284	1.42445	2.19147	0.986322	-1.55072	-1.24947	-0.789882	-1.16719	-1.26324	-1.62815	-0.0486751	-0.808925	0.444562	-0.47515	-1.45169	-1.52266	-1.80962	-2.72045	-1.68001	-2.57856	-1.05167	-0.589287
A_23_P312837	C9orf70	chr9	p24.2	0.649437	-0.624796	-0.525774	0.126333	0.00176927	2.33626	1.0355	0.924224	3.13984	0.675559	-0.86593	0.598669	0.18173	1.25773	0.0804262	1.03715	0.34456	0.649437	-0.770626	0.566867	1.65689	1.60952	0.792772	-0.525774	0.386658	1.89865	-0.20882	-0.198577	-0.610703	-0.978129	-0.893178	-0.633136	0.331283	-0.696527	0.168919	-0.679106	-1.23401	-0.329001	0.0689528	-0.22033	2.03424	0.965393	-0.616457	-0.422065	0.49826	-1.23133
A_24_P152911	ZNF311	chr6	p22.1	0.647683	-0.478089	-0.290579	0.621627	0.7437	0.610323	1.1336	0.192918	-0.0146053	0.589432	-0.290579	0.111552	0.274837	0.908029	0.672803	1.58104	0.183158	0.647683	0.905892	1.35181	0.00950152	1.13263	0.79487	-0.687671	0.212617	0.884184	1.14855	-0.0450404	-1.73092	-1.0117	-1.09564	-1.70307	0.867004	1.33435	0.342716	-1.71458	2.11296	0.788522	-1.30468	-0.827872	-2.29289	0.395334	-2.28522	0.203224	-0.0776728	0.453742
A_23_P143559	CLTCL1	chr22	q11.21	0.647058	-0.365951	-0.369973	2.65527	1.94815	1.12605	0.647058	0.789906	0.541851	-0.220653	-1.4923	0.892189	0.318961	2.60505	-0.169511	1.69879	0.139792	-0.766334	0.555361	-0.259043	1.2967	1.19289	0.907009	-0.530222	-0.287974	0.796401	0.380409	0.14174	-1.7504	-1.51712	-0.48253	0.844352	-1.38672	-1.59806	0.295186	-0.549815	-0.60621	-1.34283	-0.369973	1.03314	-1.65265	-0.185487	-1.38586	0.0727881	-0.214292	-0.334725
A_23_P135722	BTC	chr4	q13.3	0.645282	-0.975352	-0.168785	0.645282	1.0775	-0.235394	0.981427	0.125404	0.508415	0.6442	-0.344226	0.200455	-0.158035	0.909138	0.837179	0.624999	-0.196626	0.326045	0.626356	-0.309447	2.79992	1.8256	1.75473	1.48776	0.780494	1.42105	1.13361	0.692917	-1.05529	-1.5296	-1.15309	1.75345	-0.047738	-0.0662037	-0.47234	-0.95391	0.796981	-1.24583	-0.256717	-0.983193	-0.119581	-1.13949	2.35538	-1.33887	-0.967511	-1.4057
A_32_P219279	ELFN2	chr22	q13.1	0.644495	-0.471386	0.526411	0.0329553	-0.120387	0.489191	0.284163	0.100975	-0.258242	0.256778	0.0200272	-1.00051	0.295322	0.85609	1.20058	0.882488	0.644495	0.388756	0.738169	0.756836	0.704496	0.366687	1.10102	0.16919	0.956317	0.821364	0.961587	1.15777	-0.940289	-2.01601	-1.71143	-1.25375	-0.124411	0.720089	-1.68289	-1.64069	-0.149021	-2.00566	-0.585454	0.0126207	-1.50449	-0.984676	1.36418	-1.91134	-1.2725	-1.87842
A_23_P125680	FAM70A	chrX	q24	0.644203	-0.638984	0.262087	-0.00428666	0.1428	0.644203	0.978695	0.216846	0.91896	0.503089	1.51365	0.846491	1.42619	0.644299	-0.55079	0.820981	0.380173	0.547034	0.272884	0.705485	0.918564	0.890652	0.406446	0.0821803	0.890869	0.784941	-0.238078	-0.378056	-1.1124	-2.07657	-1.50412	0.630862	-0.921486	-0.618496	0.0247803	-0.659472	-0.95214	-2.25504	-0.836424	-0.415924	-1.06868	1.00711	-0.95165	-1.9448	-1.07891	-0.394898
A_24_P335620	SLC7A5	chr16	q24.2	0.640692	-0.951941	0.233269	0.537557	0.926431	0.873472	0.621788	0.882163	0.45024	-0.101678	1.20549	-0.107941	0.945938	0.711707	0.682953	1.41805	0.343228	0.797902	0.640692	0.037284	-0.618743	-0.295268	-0.366827	-0.542887	1.19288	1.23354	0.0513653	0.772118	-1.18983	-1.2634	-1.20634	-1.22754	0.653707	-0.446121	0.481175	0.612788	-1.36447	-2.61716	-1.53685	-1.25842	-0.984641	0.233269	-1.22774	-1.0089	1.06774	2.26961
A_23_P154605	SULF2	chr20	q13.12	0.640306	-0.53641	-0.0168186	0.94975	1.45782	0.750921	0.909429	1.3733	1.15788	1.13331	0.738447	0.22109	0.186542	0.52275	-0.00919045	0.128118	0.161968	-0.320479	0.640306	0.243659	0.381793	0.286421	1.38451	0.654078	0.651925	0.141474	1.29406	1.25892	-0.462321	-0.427964	-0.440926	-0.999447	0.227678	0.0207891	-3.81545	-0.578932	-1.16445	-1.53797	-0.605788	-1.02172	-0.434296	0.98253	-0.838484	0.911744	0.765622	-1.48818
A_23_P337262	APCDD1	chr18	p11.22	0.637648	-0.355036	0.127528	0.581048	0.914172	0.543673	0.853386	0.51016	-0.679571	0.395149	0.127528	-0.0650126	-0.309342	0.661306	1.26527	1.19718	0.637648	0.470827	0.741248	0.517583	1.79594	0.098118	0.00403322	0.946322	0.682019	1.04492	0.959852	0.974402	-1.86308	-1.64172	-1.27106	0.573408	0.95408	-0.172211	-1.1743	-0.795412	-0.173818	-2.39474	-0.244195	-0.72047	-2.9754	0.228256	0.750524	0.915185	-0.295441	0.555158
A_23_P129903	TRIM16L	chr17	p11.2	0.637106	-0.475556	-0.435646	0.480634	0.111301	2.51772	1.42295	1.97373	0.798478	0.165805	0.0903413	1.48092	1.18053	0.550566	2.24741	1.77281	1.65482	0.515462	1.49915	0.637106	0.257459	0.94379	0.568858	-0.235307	0.487829	-1.01962	-0.066754	-0.439248	-0.521497	-0.634741	-0.702741	-0.462256	1.84179	0.694336	0.757377	-0.488856	-2.02976	-1.85496	-0.570987	-1.64266	-1.16854	-1.60134	-1.79796	-0.259069	-1.02812	-0.824255
A_23_P16963	GPR17	chr2	q14.3	0.637063	-0.830738	-0.375617	-0.398105	0.0376446	0.615822	-0.0644928	0.0900035	-0.281679	0.420754	-0.375617	-1.19842	0.138256	0.949228	1.91154	1.34141	1.57611	0.872195	0.603279	1.27449	0.637063	0.577683	1.98803	2.04626	1.01967	1.34719	1.7312	2.15235	-0.34261	-1.14546	-1.08787	-1.04224	-1.16032	-1.26546	-1.17107	-1.27383	-1.29028	-0.755449	-1.06034	-0.545292	-1.00794	-1.2324	-0.312686	-1.05376	-0.906026	-0.973275
A_23_P122976	GNAI1	chr7	q21.11	0.635396	-0.569261	0.262898	-0.0638383	0.317646	0.502598	0.704409	0.597795	-0.131946	0.748005	0.470694	0.658399	0.00249748	0.389866	1.52139	0.635396	0.628891	1.09841	0.772534	0.660179	1.22783	0.720188	0.971241	0.378604	0.335006	0.0786354	0.393966	0.914163	-0.594991	-0.490591	-1.32084	-0.602264	-1.92954	0.405833	-0.86584	-2.00599	-0.748205	1.33732	-0.508402	-0.225134	-1.23752	0.775193	0.73186	-1.13186	-0.543532	-1.9794
A_23_P157527	LRRCC1	chr8	q21.2	0.634737	-0.192487	-0.570464	-0.459428	-0.291689	0.163501	0.285015	-0.360422	0.49579	-0.359043	0.0676721	1.63429	-0.0339466	1.32611	0.634737	1.4205	1.00726	0.091086	1.02364	1.22462	-0.0969672	1.66601	2.12905	-1.0941	0.976306	1.84139	1.49423	-0.215795	-0.594508	-1.259	-0.765182	1.41917	2.53357	0.684987	-1.40971	-0.943796	1.82864	-1.10968	-1.44302	0.658587	-1.25848	-1.6694	0.18316	-0.161576	0.39421	0.235786
A_23_P154037	AOX1	chr2	q33.1	0.634694	-0.596392	0.412287	-0.546963	2.05448	0.0191609	0.989645	0.352171	1.46007	1.20377	0.811062	1.34875	1.29725	0.653134	1.41328	-0.591478	-0.223008	-0.320954	0.535476	-0.531656	0.5319	0.634694	0.801886	0.50184	0.988579	1.15282	0.273326	0.365369	-1.38447	-1.46063	-1.40035	-0.329149	-0.830131	-0.508564	-0.569572	-0.0459148	1.5745	-1.05955	1.02833	-1.54408	-1.84043	-1.59004	0.164338	-1.05704	-0.526317	-1.32269
A_23_P88849	RRAD	chr16	q22.1	0.633805	-0.794367	0.17619	-0.683417	0.172728	2.29899	0.633805	1.40886	0.890617	0.00368379	-0.11333	1.16808	0.662185	0.248406	1.2086	1.19283	1.24726	0.136492	0.263889	0.0324996	0.212346	2.37651	1.96264	1.66003	-1.0711	-0.653641	-1.29668	0.87417	-0.99581	-1.22279	-1.44798	0.57436	-0.360733	0.058553	-1.11361	0.18748	0.955985	-1.11703	0.798004	0.659842	-1.04387	0.18736	-0.976945	-2.05082	-1.8371	-1.71007
A_23_P383118	ZSWIM5	chr1	p34.1	0.627814	-0.588135	0.370582	0.235999	0.779267	0.559666	0.729498	0.324114	-0.055349	0.323072	0.187269	-0.142332	0.214022	0.849015	0.542429	0.948744	0.869992	0.341946	0.93318	0.775656	0.704178	0.886319	1.08981	0.447248	0.667934	0.311587	0.0695709	0.627814	-1.0509	-0.575819	-0.812476	-0.60045	-1.95205	-1.34182	-0.221141	-1.42082	0.69983	-0.861486	-1.48801	-0.0712178	-2.24421	-1.21525	-0.637073	-1.05684	-0.906901	-0.560068
A_24_P623734	C2orf72	chr2	q37.1	0.626737	-0.329082	0.316315	1.60496	1.17076	1.15068	1.32583	1.5869	-0.764227	1.05803	0.331237	-0.109843	0.0631748	0.393669	0.626737	0.846417	0.122971	-0.389389	0.4947	0.516754	-0.318335	0.597637	0.766413	0.316315	0.406911	1.04659	0.845689	2.10695	-0.371279	-1.90892	-0.684512	-0.27107	0.0408347	-0.6415	-0.43601	-1.02996	-2.09557	-1.8356	-1.71887	1.07701	-1.853	-1.685	-1.09583	-2.69539	0.0277698	0.242284
A_23_P333029	C8orf47	chr8	q22.2	0.626623	-0.708814	-0.691559	1.31741	1.55042	0.0305815	1.38729	1.28313	0.419076	1.32548	0.103723	0.178029	2.36498	-0.137169	-0.273747	1.39287	-0.37694	0.221743	0.626623	0.673755	0.433557	-0.123676	0.495193	-0.368356	0.382232	1.16051	2.40993	1.34558	-1.07902	-0.669465	-0.448911	-0.438979	-0.72408	-1.19428	-0.695453	-1.00856	0.535454	-0.150706	-1.11798	-0.90381	-0.691559	-0.285672	-0.715623	-1.0504	-0.960618	-0.978975
A_24_P310009	USP43	chr17	p13.1	0.626466	-0.941141	0.00267272	0.626466	0.371853	0.466285	1.08312	0.123479	-0.585741	0.593234	0.160557	-0.522686	0.341008	0.707002	1.22385	0.695068	0.527091	-0.059394	1.14003	0.539947	0.292384	0.881906	1.79339	0.272492	0.898223	1.12859	1.92368	1.56702	-1.52142	-1.06978	-1.19815	-0.971319	-1.49328	-1.5232	-1.44594	-0.681502	-1.15356	-1.42346	-0.651853	-0.331154	-1.57876	0.228502	-1.23459	1.86202	0.789779	-1.60897
A_23_P368729	TFEB	chr6	p21.1	0.626055	-0.305454	-0.0986843	0.609425	-0.0863706	0.384931	-0.632945	-0.189156	-0.530478	0.52847	-0.0986843	0.161743	0.718808	1.34903	1.57459	1.09844	1.26925	0.68493	-0.0594584	-0.0244825	1.46908	0.916471	0.626055	1.63772	0.594102	1.14352	0.811632	1.11453	-0.98606	-2.01502	-1.17084	0.141758	-0.78129	0.393783	-2.34891	-1.36333	-1.25999	-2.03252	-0.308893	0.243313	-1.69958	0.566006	0.217988	-2.58258	-2.07145	0.446221
A_23_P154929	BID	chr22	q11.21	0.625942	-0.598401	0.0629041	1.39229	1.69266	0.438847	1.11815	0.982056	0.241406	0.625942	0.923245	0.277412	1.49364	0.241121	0.694131	1.38074	0.869013	0.219909	0.936147	0.199478	-0.918977	0.142054	0.388534	0.370905	-0.0467692	0.0920686	1.21462	1.06258	-0.734076	-0.940917	-0.8571	-1.07535	-0.491067	-1.06883	-0.572053	0.469982	-1.13294	-0.825255	0.416958	1.34202	1.26621	-1.31282	-2.44351	-0.687863	-0.624749	-1.39281
A_24_P912167	CADPS	chr3	p14.2	0.623415	-0.577144	0.0663996	1.09301	0.470931	1.2751	0.623415	0.961906	1.64524	1.31883	1.59951	0.64072	1.56618	1.18822	0.33012	0.208956	-0.104042	-0.0277158	0.107801	-0.155776	0.18054	0.492329	0.845991	0.58572	-0.34908	-0.0134907	1.35163	0.989608	-0.289992	-0.109478	1.2029	-1.78643	-1.08934	-1.06366	-0.959401	-1.31236	-1.91954	-1.59555	-1.7832	-0.566389	0.289061	-1.34529	-0.983742	-2.16522	0.238578	-1.79531
A_23_P45536	MCF2	chrX	q27.1	0.622648	-1.08266	0.581957	0.622648	0.869395	1.00696	-0.0369807	0.849559	-0.140421	0.0492861	0.479014	0.243858	0.231641	0.575916	0.888404	-0.127544	1.01937	0.415156	0.83871	0.900448	0.594678	1.30964	0.853312	0.427812	0.346319	0.420668	1.0205	1.03349	-1.64404	-1.66897	-1.40544	-1.33035	-1.25852	-1.51412	-0.677375	-0.506935	-1.00213	-1.36067	-1.24922	-1.21124	-1.48575	-1.48327	-0.522919	-1.61934	-0.559915	-1.56507
A_23_P18518	TRAM1L1	chr4	q26	0.621333	-0.386561	0.256168	1.2957	0.950712	0.419949	1.23006	0.835251	0.830303	1.28417	1.00969	1.03058	0.458019	0.304301	0.386771	0.172337	-0.407805	-0.524585	0.40041	0.321669	0.621333	0.674857	1.80736	0.97778	0.945808	0.309762	0.24814	1.24696	-1.64698	-1.83168	0.0308672	0.840918	-1.58232	-0.650984	-0.602582	-1.72251	-1.43158	-0.387424	-1.54919	-1.7314	-0.2913	-0.399147	-0.300122	-1.08188	1.33179	-0.213635
A_32_P108870	PMP2	chr8	q21.13	0.620849	-0.0397009	0.441538	0.620849	0.75705	0.900779	0.777079	0.514071	0.292149	0.705173	0.47425	1.00239	0.734517	0.764953	0.309191	0.723253	0.61189	0.348225	0.534846	0.439605	0.523735	0.759808	0.668857	0.641236	0.582665	0.805237	0.608496	0.551398	-1.12344	-2.7583	-1.3878	0.424407	0.493041	-0.128415	-0.119314	-0.650369	-1.65603	-2.25772	-2.17888	-0.123699	-1.357	-2.82564	-2.5425	-3.09011	-0.512171	0.472504
A_32_P193583	C4orf39	chr4	q32.3	0.620592	-0.431834	0.120331	-0.128534	0.524844	0.293733	0.171768	0.116587	0.618192	0.513589	0.492358	0.960376	0.0898471	0.993516	1.94932	0.855385	-1.55041	0.620592	1.22388	1.09238	0.251922	1.68019	1.76957	0.310255	0.766067	0.860683	0.645541	0.466189	-0.838152	-0.156142	0.301246	0.380316	-1.14357	-0.684914	0.913939	0.270445	-0.731694	-0.901167	-3.07454	-1.24702	0.680913	-1.92279	0.151597	-1.22436	-1.25082	-1.21119
A_24_P555473	MARCH3	chr5	q23.2	0.619504	-0.229233	-0.116374	0.663089	1.46586	0.657651	1.30288	0.619504	0.83722	0.706352	1.31213	0.700316	1.28416	0.763362	0.183043	1.29552	-0.0924803	-0.257342	0.191598	-0.0404274	0.578021	0.595743	0.483018	0.867911	0.197935	0.454745	1.40428	0.610367	-1.55966	-0.363215	-0.220902	0.031389	0.614001	0.113547	-2.05453	0.282506	-0.0516058	0.105936	-0.0367961	0.149627	0.0880365	0.603168	-2.56159	2.4848	-2.43634	-1.4627
A_24_P96961	SPSB1	chr1	p36.22	0.618777	-0.341082	0.224192	0.432645	1.48712	0.271646	1.13381	0.928094	1.82432	1.6592	2.12393	1.57773	0.939135	0.795349	0.721036	0.618777	0.946507	0.217207	-0.176003	-0.0568764	-0.401137	0.0351	0.471918	0.420252	0.532624	0.359162	0.481191	1.05691	-0.214386	-0.259042	-1.06138	-0.13696	-1.85928	-1.56566	-1.99105	-0.0855386	-2.2015	-0.884502	0.668744	0.228203	1.08924	-0.346687	-0.589591	0.465997	-3.07391	-1.22964
A_24_P409013	WDR78	chr1	p31.3	0.616995	-0.182379	-0.392548	1.00162	0.976648	-0.0423642	1.18882	-0.0223774	0.497098	0.116896	-0.908199	1.42065	-0.615408	0.764024	-0.239321	0.616995	0.335908	-0.200539	-0.67945	0.00744757	1.66359	2.22465	1.16617	0.0817909	1.43159	2.09942	1.073	0.201631	0.0182165	-1.15906	0.134916	0.556556	0.219298	-1.16642	-1.59478	0.38292	-0.321688	0.444621	2.05746	2.16119	-1.31207	0.393955	0.487433	1.08571	-1.08898	0.28173
A_32_P83845	HEY1	chr8	q21.13	0.614014	-0.373514	-0.0195121	1.40407	1.80722	0.680926	1.05502	1.09704	1.49015	0.489687	0.741726	-0.20613	0.160196	1.1356	0.478446	0.985549	0.257554	0.22897	0.614014	0.394605	-0.453051	0.465184	0.75666	-0.142883	0.520157	0.250532	1.99777	1.40782	-0.421952	-1.09574	-1.35776	-0.174954	0.309346	0.00805882	-3.15043	0.785686	-1.92753	-1.01001	-0.100301	0.537954	-1.17457	-0.648307	-1.15037	-1.96627	-0.927768	-0.0348672
A_23_P137931	ADORA3	chr1	p13.2	0.613537	-0.257777	-0.128373	-0.23642	0.606382	1.24623	0.3554	0.972509	0.489082	0.657781	0.293621	1.25682	2.0097	0.966774	1.11266	-0.346006	1.0112	1.14713	0.377381	0.613537	1.61773	0.744418	0.591054	1.00825	-0.492691	-0.179463	0.301152	-0.20203	0.715616	-0.204092	-0.0114312	0.534679	-1.26419	0.411357	-2.06609	-0.058942	-1.23758	0.730983	-1.64996	0.662864	-1.48291	-1.26108	-2.00739	-0.419845	-1.02226	0.0169139
A_24_P701776	ARHGEF5	chr7	q35	0.612658	-0.532349	0.234916	-0.931964	0.316266	0.21182	0.889072	-0.286742	2.16344	0.880581	0.644327	1.89316	1.58744	1.04657	0.612658	0.598492	0.267903	-0.235816	0.683483	-0.198612	0.731929	0.335407	1.12024	0.234916	1.27593	1.37693	-0.147586	-0.121823	-0.508782	-0.139832	-0.422083	0.0109747	-0.555917	-1.27276	-1.40386	0.498413	1.14283	1.08619	-1.47417	-1.61434	-0.580295	-1.33034	-1.5456	-0.4972	-1.58854	-0.782946
A_24_P299474	ODZ2	chr5	q34	0.612104	-0.96394	0.743197	0.31182	0.608585	0.875362	0.792113	0.420445	0.639915	0.612104	0.0328917	0.987811	1.0007	1.11826	0.202546	-0.301274	0.98277	1.20553	1.20784	0.987222	0.209182	0.455238	0.269093	-1.10375	0.701341	-0.0877834	-0.184238	0.0589134	-1.3829	-0.972513	-0.543297	-1.27064	-0.955367	-1.63496	-1.71297	-0.868349	-0.380618	-1.12676	-1.42315	-0.647533	-0.496558	0.447905	1.2153	-1.46856	-0.850014	-1.65964
A_23_P147647	SGCD	chr5	q33.3	0.612078	-0.649841	0.4254	1.39545	1.42351	0.125713	0.129298	0.818359	0.0308339	0.644853	0.0589183	0.204903	-0.43683	1.08336	1.04505	0.683283	1.37618	0.324782	0.207684	0.845041	0.34258	0.598412	0.612078	1.07643	0.297787	-0.043754	1.03775	1.73931	-1.68902	0.139767	-0.674305	0.184239	0.40067	-0.00635622	-0.842902	-2.48678	-1.22776	-1.42267	-0.539818	-1.1467	-0.894254	1.68469	0.627775	1.34622	-1.64697	-1.36518
A_23_P123672	TDRD7	chr9	q22.33	0.612069	-0.384997	0.0544093	0.872926	1.31348	0.904269	0.340687	0.120142	0.550873	0.0519397	-0.662864	0.639991	0.21078	0.591983	0.0998306	1.44149	1.53424	1.12981	-0.0879493	-0.272016	0.461246	1.60168	0.767476	1.1434	0.0552641	0.918597	1.37617	0.612069	-0.826476	-0.345748	-0.424246	0.582073	-1.08724	-0.452035	-2.86163	0.793779	-0.643353	-1.86577	0.071897	-1.12117	-2.42393	-2.66867	-1.3084	-1.09979	-1.39859	0.323574
A_23_P339818	ARRDC4	chr15	q26.2	0.611936	-0.52105	-0.250619	1.01244	0.673025	1.35789	1.59834	1.02073	0.482747	1.36584	-0.0435941	0.362018	2.45813	0.611936	-0.234187	1.64853	1.20856	0.638846	0.424872	0.220003	-0.00383959	0.0300466	0.492486	0.742912	0.538705	0.38139	0.483209	0.868132	0.149126	-1.06401	-0.878317	-0.551169	-1.36917	-1.59017	-1.13752	-0.308563	-2.48495	-1.19274	-1.0181	0.197554	-0.912002	-1.72703	-1.10906	-0.372515	0.20638	-1.53575
A_23_P54340	MEGF11	chr15	q22.31	0.61177	-0.65398	0.638676	0.388759	0.03944	0.183551	0.572445	-0.148751	0.62375	1.44046	0.662473	0.234104	1.08654	0.377904	0.77668	0.718314	-0.0927831	0.667785	0.507741	0.622045	0.840724	0.19809	0.833211	0.915071	0.96491	0.967854	0.515204	0.61177	-0.168286	0.0108659	-0.545423	-1.53527	-1.57861	-2.18167	-1.47488	-1.59573	-1.48931	-1.92934	-1.25642	-1.12034	-1.84833	1.10191	-0.492228	-2.34435	1.34648	-0.507274
A_23_P251043	TMEM90B	chr20	p11.21	0.61099	-0.357951	0.375515	0.187675	0.793599	0.402827	0.647185	0.883289	0.397804	0.644998	0.38982	0.117758	0.61099	0.502081	0.648199	0.827274	0.649291	0.91429	0.453046	0.240994	0.302361	0.946394	0.850446	0.789608	0.122658	0.333062	0.303783	0.835011	-0.564783	-1.32656	-0.73151	0.265506	-0.196035	-0.764448	-3.61837	-2.81857	-1.35829	-2.47027	-0.326729	0.446046	-1.86292	0.64733	-0.350964	0.750643	-1.61917	-0.84265
A_23_P327519	STARD4	chr5	q22.1	0.610409	-0.579133	0.415349	0.926562	1.20512	0.433838	0.808501	0.94176	-0.575728	-0.265652	0.762166	0.72725	0.491082	0.190388	0.0665295	0.199083	0.885469	0.629815	1.55359	1.92238	-1.16796	0.875312	0.610409	1.75792	-0.979132	-0.343336	0.801672	0.103995	-1.35275	0.521632	-0.619556	-1.74258	0.535941	-1.24435	-1.48615	-0.171661	-0.846019	-0.660352	-1.91046	-2.70921	0.515315	-0.0554398	-1.26367	-1.93754	-0.601333	0.327003
A_23_P32064	NELF	chr9	q34.3	0.609133	-0.415837	-0.118637	1.2515	0.584124	0.5392	1.11155	1.18317	-0.310589	0.109699	-0.535956	0.457255	0.609133	1.06963	0.635403	0.972412	-0.662406	0.154966	0.0731787	0.480753	0.887485	1.85548	0.90805	-0.0559762	0.0336404	1.11676	0.0806433	1.06989	-0.223896	-1.45607	-1.507	-0.358304	-0.565831	-0.220527	-1.77453	-1.19497	-1.20207	-2.10745	1.75715	0.52715	-2.51845	-0.333006	-0.142058	-0.193954	-0.338394	-1.30864
A_23_P392402	GLP1R	chr6	p21.2	0.607493	-0.629055	-0.613221	1.4631	2.05623	-0.67269	1.35221	0.33284	-0.636258	0.855869	0.820157	-0.740905	0.644804	-0.131147	2.29011	-0.653218	0.607493	0.0225488	2.35312	1.81746	0.310078	-0.261819	-0.366929	1.2316	1.31697	0.599201	2.17488	2.46672	-0.361042	-0.500239	0.404413	-0.751221	-1.14608	-0.787467	-0.855018	-0.049896	-0.973434	-0.623417	-0.396988	0.0277399	-0.637456	-0.210607	-0.966863	-0.929648	-0.268095	-0.38718
A_24_P810290	PPAPDC1A	chr10	q26.12	0.606351	-0.662272	0.363093	0.590013	0.606351	0.550979	0.64406	0.706953	0.340235	0.494328	0.613461	0.985635	1.23321	1.02508	0.855217	0.778763	1.0031	0.545918	0.49026	0.687879	0.747276	0.317506	0.59914	0.763542	0.518422	0.141746	0.641572	0.581173	-0.662696	-1.32948	-1.82877	-1.23064	-2.19908	-1.47899	-2.23091	-2.05236	-1.69693	-0.645609	-1.88838	-1.0174	-0.779253	0.188031	-1.93298	-0.628365	1.45928	-1.43307
A_24_P205604	PADI2	chr1	p36.13	0.605171	-0.601864	0.203366	0.0309932	0.564335	1.59683	0.418933	0.927249	-0.42359	0.405272	0.525441	0.742888	0.605171	0.531564	1.10967	0.0291344	1.10836	1.5926	0.762689	0.302171	1.38844	1.17	0.8023	1.95897	0.228137	0.912152	0.0879419	0.521433	-1.05545	-0.92438	-1.13851	0.664472	-1.83312	0.3623	-1.92379	-0.988151	-1.49472	-1.05799	-2.02474	-0.266811	-1.51439	-1.47755	-1.81779	-1.59529	-1.56188	-0.336351
A_24_P102293	SLITRK5	chr13	q31.2	0.605098	-0.743015	0.264635	0.615087	0.86764	0.76169	0.892258	0.604939	-0.413766	0.699798	0.80591	0.28817	-0.0977306	0.0165127	0.571218	0.756126	0.777976	0.279723	0.654879	0.481454	0.825305	0.690021	0.690585	0.0272182	0.517888	-0.117651	0.464939	0.605098	-1.76772	-1.81131	-1.89773	-0.577409	-1.84599	-1.58539	-1.68206	-1.87245	0.412969	-1.32548	-0.805514	-0.407364	-1.69851	1.86487	1.29952	-1.35573	-0.820658	0.121809
A_23_P45871	IFI44L	chr1	p31.1	0.604873	-0.305762	-0.384444	0.604873	0.698218	1.50157	-0.26034	0.116004	-0.359171	-0.209736	-0.0181925	0.330239	0.910396	1.12679	1.32088	2.19019	2.27714	1.78287	0.605238	0.415766	-0.143658	1.27905	0.349382	0.792766	0.319994	0.983032	0.498285	0.290963	0.331446	-0.358507	0.138602	-0.935548	-0.253016	-0.762861	-1.51121	1.77485	-1.02508	-1.03941	-0.186966	1.57616	-1.42742	-1.59487	-1.39754	-1.77508	-1.83738	0.261338
A_24_P115490	PTCH1	chr9	q22.32	0.603693	-0.578144	0.315218	1.16668	0.466645	-0.251789	1.17758	0.603693	-1.32116	0.820855	-0.440215	-1.00451	-0.152652	1.25441	1.26696	-0.0628069	0.44011	0.523571	0.863383	0.337936	1.11554	-0.0762671	1.50802	-0.360548	1.29997	-0.588916	0.857442	1.93609	-0.988539	-1.78639	-1.7048	0.676623	-0.453194	0.692698	-0.672085	-0.93695	0.514079	-2.45086	1.68649	-0.526773	-0.396268	2.8854	-0.568861	0.846313	1.25845	-1.16739
A_23_P91910	PLSCR4	chr3	q24	0.602326	-0.355961	0.216385	1.08313	1.36858	0.968787	0.866379	0.871357	0.011515	0.925959	0.62563	0.67508	0.00554104	0.296509	0.598919	0.450915	0.370336	-0.117085	0.0160578	-0.628636	1.06224	0.71153	0.534456	0.856975	0.296779	0.602326	0.613354	0.775748	-0.402139	-1.11722	-1.2088	1.05934	-2.01322	-1.23119	-3.14257	-0.642969	-0.656978	-1.99653	-0.654866	0.549011	-0.720914	1.43417	-0.480297	-0.309782	-2.19145	0.815941
A_23_P256033	EEF1A2	chr20	q13.33	0.602117	-0.725969	0.399735	-0.223133	0.226858	0.385637	0.421155	0.533799	0.119071	0.0792146	0.261865	0.30249	1.0542	0.796333	0.894439	0.973968	0.602117	0.995161	0.676743	0.932828	0.669992	0.97931	0.689504	0.984372	0.499344	0.888296	-0.153633	0.0495974	-0.177588	-1.62922	-1.31919	-1.795	-0.928957	-1.3121	-0.953699	0.00218907	-0.897443	-2.1911	-1.65587	0.426376	-2.07073	-0.354339	1.81288	-0.673067	0.712165	-2.72874
A_23_P91230	SLPI	chr20	q13.12	0.601518	-0.954758	-0.0808637	-0.644962	0.498528	0.206686	-0.323277	0.111191	0.323166	0.0501209	-0.323317	1.40644	0.525091	1.68135	0.601518	1.93604	0.974747	0.560392	0.490529	0.874667	0.819177	1.72756	0.357036	0.855149	1.31411	1.71945	1.31965	0.783584	-1.32717	-1.68939	-0.932679	-0.605843	-0.99038	-0.976837	-1.71846	0.805011	1.54023	-0.846061	1.61924	1.0489	-1.16255	-0.440233	-1.40789	-0.701917	-1.11299	-1.03594
A_23_P45999	FBXO2	chr1	p36.22	0.600952	-0.664202	0.348068	0.998048	0.347383	0.561561	0.554634	0.390783	0.0826799	0.181084	-0.595091	0.600952	1.22739	0.87269	1.25215	-0.530273	1.18442	0.890871	0.494952	0.549443	0.932828	1.47253	0.865249	0.657887	0.789707	1.15379	0.358348	0.0338843	-0.958833	-2.29044	-1.53904	-0.0260637	-1.33409	-0.672201	-2.60878	-1.64619	-0.526399	-0.6761	-1.77016	0.712466	-0.333585	0.348068	-0.608661	-2.13493	-1.37703	-0.0375115
A_23_P18282	DLEC1	chr3	p22.2	0.598992	-0.592099	-0.0760464	0.430656	0.148088	0.54284	2.18204	1.03528	-0.143312	0.210259	-0.0760464	0.988721	-0.587419	1.29492	1.26307	0.200312	0.544451	0.598992	0.586542	0.107503	2.58903	1.68634	1.73108	1.2028	1.24216	2.00158	1.37469	0.0300042	-1.11423	-1.50951	-0.882957	1.24833	-1.30581	-0.547349	-1.19692	-0.29251	0.767298	-1.33467	1.13826	0.456186	-0.747422	-1.04121	-1.48063	-0.269355	-0.63685	-1.51138
A_23_P256205	ABLIM3	chr5	q32	0.597952	-0.903218	0.120561	0.0161073	1.02895	0.473096	0.292251	1.14752	1.03265	0.26198	0.120561	0.810992	1.32401	1.15687	0.945785	0.990214	1.04843	0.489992	-0.00185056	0.102787	0.267195	-0.128021	0.706415	0.618253	-0.0329185	-0.0353133	0.597952	0.845968	-1.90037	-1.46043	-1.98557	-0.939029	-0.836628	-1.25818	-2.6899	-1.57227	-0.197311	-1.62464	-1.68903	-1.00792	0.0125127	-0.943576	0.429556	-2.71789	-1.56092	0.586109
A_23_P356004	KCNIP3	chr2	q11.1	0.595239	-0.64821	0.279979	0.498391	0.886029	0.280111	0.0399072	0.352468	-0.512835	0.0335899	-0.361696	-0.0821483	0.44556	0.91046	0.98995	1.37821	0.379538	0.210822	-0.11012	0.677619	0.745909	1.54173	1.30393	0.508001	0.699397	1.09461	0.595239	1.16089	-1.23355	-1.54737	-1.33422	-0.0889172	-1.22129	-1.61104	-1.74026	-0.777369	-1.45289	-0.676116	-0.431601	0.364896	-0.484826	-1.60814	1.00333	0.279835	-0.620303	-2.63767
A_23_P62999	EXTL1	chr1	p36.11	0.595195	-0.646665	-0.31386	1.08615	-0.0579907	1.06299	0.595195	0.427252	-0.0504259	0.561335	-0.637075	0.306701	-0.0405049	-0.172189	1.68965	0.601071	1.18373	0.217043	0.828791	1.16245	1.16808	0.0105774	0.924811	0.312499	0.245649	0.293268	1.10983	1.89023	-0.736838	-1.51544	-0.734019	-1.28017	-1.66749	-2.31267	-1.75834	-1.51472	-1.45306	-0.90964	-1.28146	-0.328282	-0.448046	-1.26539	0.666358	-0.338985	-1.13007	-0.702822
A_23_P143147	TCFL5	chr20	q13.33	0.594846	-0.561001	-0.380113	0.341994	0.623611	0.62752	0.589893	0.211277	2.12276	0.228916	-0.298424	0.71912	-0.166836	0.240794	0.0161591	0.208585	0.0393915	0.858331	0.104678	-0.182441	1.70086	1.59902	0.594846	0.400448	2.25906	2.89697	2.2974	0.729197	-1.51195	-1.14061	-0.78721	-0.904354	-0.446084	-0.495851	-0.194646	0.390502	-0.86903	0.0151739	-1.32192	-0.397473	-1.09713	1.53232	-1.72264	0.524812	-1.06422	-0.388172
A_24_P60887	ANGPT1	chr8	q23.1	0.594723	-0.678642	-0.210931	1.06249	1.65612	1.20088	1.15639	1.02379	0.55929	0.192245	1.18246	0.982487	0.594723	0.479505	0.457123	0.404313	0.657038	0.219572	0.623181	1.22433	0.614302	0.832028	0.319675	0.363817	0.371188	0.591107	0.573362	0.278119	-1.10116	-0.485351	-1.55618	-1.58962	-0.786005	-1.19354	-0.736626	0.0779112	-0.726046	2.39804	-1.95724	0.308497	-0.626158	0.194387	0.959948	-1.69284	-1.79272	-0.802105
A_23_P63980	LRFN4	chr11	q13.2	0.594681	-0.251716	-0.351354	1.58573	1.5019	-0.15257	0.57655	0.734159	0.290303	0.400903	0.729613	-0.949244	0.703639	0.54895	0.439623	0.594681	0.464291	-0.226748	0.886065	0.39393	0.659651	0.791214	1.72324	-0.486854	0.208599	1.46566	1.45703	1.0077	-0.308873	-0.194558	0.0524746	-2.15751	0.315177	0.257496	-0.565911	-1.03519	-0.210787	-0.17349	0.484957	0.543203	0.402374	-0.674203	1.66663	-0.790205	0.455218	-2.60567
A_24_P37264	RNF144A	chr2	p25.2	0.593443	-0.787767	0.0305724	0.799158	0.869757	-0.0261563	0.52191	0.562181	-0.0878516	1.11482	0.732059	-0.67557	-0.336621	0.327575	1.01057	0.792052	1.3199	0.494209	0.560925	1.11685	0.593443	0.014417	0.670247	0.864949	0.881408	0.58709	1.12206	1.27339	-1.57078	-2.18923	-2.42887	-0.783971	-0.414774	-0.505827	-1.18992	-1.46702	0.0305724	-0.45616	-0.86441	-0.791563	-0.853669	-0.623647	-0.888188	2.21757	-0.97988	-1.9587
A_24_P943894	SCUBE3	chr6	p21.31	0.592124	-0.815586	-0.108728	1.3454	1.85971	0.543093	0.592124	0.840673	0.0462117	0.477449	2.22023	0.103901	0.185055	0.717848	-0.426594	0.455263	1.56169	0.07239	0.98861	0.116518	1.63651	2.19556	-0.0755312	-0.0480808	0.188969	1.26486	1.3919	2.01971	-0.211142	0.454604	-0.587719	-0.447211	-0.841349	-0.577627	0.669323	-1.38696	-0.810752	0.882143	-0.844024	-0.860807	-0.233383	-0.455936	-0.789822	-0.599697	-1.25088	-1.24507
A_23_P216153	MMP16	chr8	q21.3	0.592013	-0.795173	0.391651	-0.459505	0.189763	0.536119	0.568291	-0.0749574	0.27255	-0.569525	0.312177	-0.983864	0.597077	0.988878	0.947221	0.932776	1.46794	0.887011	1.09109	1.38643	-0.0188085	1.2638	1.33606	0.391651	0.215054	0.368177	0.944801	0.592013	-0.606663	1.08551	1.14016	-1.51185	-0.950489	-1.61497	-1.31271	-1.83533	-0.00762167	-0.802503	-1.42503	-1.29643	1.34834	-1.91552	0.37441	-1.10432	-0.458933	-1.20872
A_24_P367776	ACSM5	chr16	p12.3	0.591392	-0.803086	-0.169425	-0.050704	1.64864	0.359163	0.591392	1.0249	0.0155064	-0.229348	-0.169425	1.93198	1.88961	0.609453	0.217161	1.1968	1.56359	0.650349	0.296501	0.182842	2.37511	1.25958	1.09851	1.00719	-0.229189	-0.240799	-0.472045	-0.266935	-0.871751	-0.513191	-0.928356	1.85889	-1.22783	-0.550223	-1.40035	-1.14148	-1.13595	-0.81092	-0.811753	-0.336793	-0.664611	2.19349	-1.58196	-0.968682	-1.50688	0.0632386
A_23_P115261	AGT	chr1	q42.2	0.591361	-0.327851	0.322122	0.991616	0.760494	0.631989	0.160934	0.454825	0.437574	-0.0816235	0.322122	0.26004	1.21897	0.278779	0.859584	0.425419	0.591361	0.488876	0.498076	0.0214718	1.37256	1.28491	1.19865	0.833597	0.685102	0.57289	0.779085	0.904032	-0.0424896	-1.0042	-0.887752	1.02447	-0.0898344	-0.499954	-2.57399	-0.748105	-1.56566	-2.04932	-1.14267	-0.0802336	-1.67806	-2.49314	-2.09198	-3.27624	1.29663	-0.45491
A_23_P170649	C8orf84	chr8	q21.11	0.590964	-0.727337	-0.718401	1.46606	1.62056	1.62736	-0.00877217	1.75799	0.82996	0.375754	1.4369	1.59011	2.34913	0.356904	0.839444	-0.635844	1.08441	0.590964	0.782044	-0.00678161	0.619326	0.442257	0.373382	-0.718401	-0.000868371	0.367772	-0.705966	0.150353	-1.04098	-0.892013	-0.947267	-0.668083	1.5264	2.5738	-0.68376	0.665519	-0.32167	-0.26056	1.26685	0.0717357	-1.05177	-0.764075	2.40952	-0.890796	0.688137	-1.04635
A_23_P342825	FBXW4	chr10	q24.32	0.590772	-0.282718	-0.214187	0.990402	0.802676	1.95048	0.409291	0.790945	-0.850605	0.214979	-0.370862	0.347573	0.674979	0.680302	1.04065	2.28257	1.94488	0.590772	0.0683265	-0.134281	0.333686	-0.0433925	0.733372	-0.371252	0.178178	0.544513	1.12804	0.505042	-0.496202	-1.01579	-0.667819	-0.211577	-0.989973	-0.485156	-4.50694	-1.27019	-2.42437	-1.27575	-1.11219	0.220261	-1.17865	0.305126	1.76625	-0.0776905	-0.76646	0.0572402
A_23_P96369	CXorf57	chrX	q22.3	0.588763	-0.590946	0.324815	0.129536	0.359716	0.624239	0.546127	0.304534	0.818814	0.468846	0.718042	0.50074	0.197322	0.223464	0.498427	0.588763	0.358104	0.24077	0.808521	1.00519	1.07887	0.883887	0.747713	0.324815	0.99162	1.14144	0.607214	0.591997	-0.21847	0.261477	-0.112732	0.10845	-1.87457	-0.665619	-0.325532	-2.26209	0.961335	-2.1776	-0.643489	-2.53117	-0.296511	-0.586671	-0.869342	-2.70168	-1.77915	-0.766584
A_23_P109322	PCP4	chr21	q22.2	0.587453	-0.478076	-0.569973	0.920829	0.834843	0.540602	1.17541	0.587453	0.202786	0.199371	1.18208	0.245525	0.357215	0.691571	0.349589	0.453904	0.198266	-0.490817	0.98072	-0.127122	1.06313	1.10633	0.211408	1.18811	0.976375	1.26783	1.51762	1.2849	0.62064	0.937878	0.527036	0.842922	0.515267	-0.742465	-1.59466	-0.519003	0.822462	0.26907	-0.563263	-0.258627	-1.97261	-1.98316	-2.16556	1.2661	1.83995	-1.6007
A_23_P13866	GLUD1	chr10	q23.2	0.587177	-0.823973	0.125125	1.74808	1.82745	0.587177	1.11343	-0.882989	-0.00656229	0.491515	0.124704	-0.0081269	0.610704	0.3175	0.316933	1.14685	0.0780364	0.430264	1.07166	0.410607	0.307884	1.10433	1.30614	0.353906	0.333848	0.691175	1.60953	1.00408	-1.13212	-1.37171	-0.966831	0.0617019	-1.73298	-0.968602	-1.66196	-0.823548	-1.52159	-1.48599	-2.1301	-0.355896	-1.90609	1.0554	-1.05736	-1.38197	-1.28348	0.0820741
A_32_P16339	APLF	chr2	p13.3	0.584393	-0.130964	-0.429486	0.363383	0.150235	0.593708	0.437902	1.23779	0.816241	0.553647	1.0109	1.0503	0.459883	0.273724	0.856885	1.49879	-0.220793	0.766107	1.13383	1.24269	0.482718	1.32295	0.584393	0.26209	0.146822	0.474973	0.680173	0.35685	-1.31945	-0.84388	-0.0322319	-0.441868	-1.18954	-2.14415	1.94721	0.326919	-1.5482	1.23709	1.52317	0.247682	-2.07815	-0.589207	0.978224	1.5241	1.69895	-0.370926
A_23_P141946	LTBP4	chr19	q13.2	0.583491	-0.691487	0.198097	0.292964	0.783212	-0.707547	-0.00923705	0.583491	-0.385824	0.69344	0.964266	0.277924	1.25443	1.98129	1.58435	1.28799	0.382633	1.23778	1.21384	0.490536	-0.241104	1.21917	-1.55037	-0.558648	0.777029	1.51312	-0.0381317	0.00206712	-1.37889	-0.829862	-1.59117	-0.68011	0.54361	-1.07765	-1.26539	-0.693456	0.440327	-1.03695	0.198097	1.0935	0.48018	-0.0317163	1.36772	-2.18109	0.451606	-1.02357
A_32_P78349	ODZ3	chr4	q35.1	0.583445	-0.425239	0.402513	0.5978	0.463153	0.574841	0.501027	0.583445	0.584981	0.653978	0.864179	0.378907	0.692311	0.673814	0.32884	0.531126	0.364803	0.560129	0.618503	0.673686	-0.0485694	0.48343	0.809999	0.366205	0.516804	0.748698	0.81294	0.727799	0.391969	0.785145	0.777447	0.414964	-2.01867	-1.77481	-1.23881	0.625944	-0.987298	0.709538	0.888664	0.481947	0.779755	0.9487	0.98874	-1.17715	-1.49682	-1.96372
A_23_P155301	NEK11	chr3	q22.1	0.583174	-0.20738	-0.168965	0.448018	0.874656	0.937468	1.66726	0.583174	0.0594563	0.48206	-0.724905	1.2261	-0.107345	0.326521	0.0300538	0.675065	-0.369212	-0.61407	0.235241	0.077328	0.841797	2.2246	1.38872	0.517819	1.18604	2.70996	2.21398	-0.00277176	-0.422711	-1.51985	0.0823639	-1.01571	-0.539585	-1.30146	-0.190288	-0.224473	-1.47606	-1.21346	-0.0915044	0.216873	-2.45744	-0.460168	0.300651	0.543386	0.332158	-0.0193947
A_23_P417383	ASPRV1	chr2	p13.3	0.58305	-0.383667	0.0186048	1.85183	0.966625	0.792214	0.649077	0.560895	-0.223082	1.78724	-0.0748797	-0.902477	-0.0220868	0.54261	0.32058	0.58305	0.636747	0.159412	-0.160659	0.188023	0.642794	0.236335	0.509923	0.311787	1.06001	1.43482	1.85812	1.76655	-0.963582	-0.27184	0.183104	-0.378191	-0.746733	-0.715829	-0.946752	-0.0185373	-2.00847	-1.90673	-0.399976	-0.785071	0.569217	-2.44088	-0.183098	1.27068	-2.91465	0.559922
A_23_P49865	YBX2	chr17	p13.1	0.583014	-0.388467	-0.18405	2.2214	1.80579	1.57452	0.828276	0.628194	-0.0985195	0.583014	0.637311	-0.967279	0.00672237	1.10454	0.288956	0.200086	0.477279	-0.279111	0.810998	0.100755	0.173199	0.692267	0.578192	-0.181775	0.507375	1.79872	1.70681	1.45753	-1.85046	-1.98413	-0.970218	-0.731535	0.512446	-0.273403	-0.052255	1.24168	0.177234	-1.31877	1.02668	0.0542722	-1.04267	-0.285566	-1.0016	1.16933	0.900729	-0.176081
A_24_P388190	KCNK3	chr2	p23.3	0.581409	-1.02564	-0.269128	1.39086	0.267779	-0.508424	0.612641	1.34498	0.259704	1.92264	1.22396	1.44812	0.606256	0.695874	0.0115641	0.581409	0.312155	0.295866	0.693851	0.307499	1.43067	0.0336623	0.200175	1.35519	0.539538	0.653868	0.482999	0.977716	-1.11416	-1.56122	-1.52421	-1.36929	-0.346182	-1.0189	-1.41518	-0.0845148	-1.06485	-1.49001	-0.322191	0.576241	-0.986083	-0.269128	1.67071	-1.64178	0.237786	-1.37928
A_23_P435636	DAND5	chr19	p13.2	0.579231	-0.365597	-0.662919	1.8587	1.11064	0.580302	0.678726	0.493341	0.437428	0.346306	-0.783727	-0.414768	-0.16075	1.31825	1.6175	-0.0552925	0.560999	-0.0614822	0.31628	-0.219774	0.968197	0.626982	0.188292	-0.552402	0.579231	1.15562	1.56348	1.20494	-1.59647	-1.2759	-1.31923	-0.684943	1.31293	0.00918484	-0.948286	0.742736	0.68462	-1.85034	1.93436	1.73573	0.252092	-1.75043	2.79898	0.474675	-0.333923	-0.959621
A_24_P912021	SOX6	chr11	p15.2	0.572954	-0.221964	0.0164632	-0.411109	0.203148	0.572954	0.356074	0.0917978	0.28962	0.403874	0.226108	-0.49821	-0.095654	0.468188	1.50785	0.731633	0.978372	0.282195	1.07364	1.09316	0.258476	1.2454	1.59823	0.213343	0.929343	1.56487	0.99743	1.31452	-0.911348	-0.351198	-0.235445	0.062571	0.149323	0.0862038	0.373564	0.186739	-1.19037	-1.86502	-2.19239	-0.649919	-1.73007	-0.689873	-1.55281	-2.98629	0.236744	-0.143958
A_23_P40192	CDH22	chr20	q13.12	0.56774	-0.80474	0.157132	1.45928	0.893211	0.401262	0.494766	0.56774	-1.06768	0.0832231	-0.226962	0.19887	0.995607	0.402606	0.473369	0.75872	0.220626	0.35443	0.790153	0.680259	0.619362	0.638316	0.529615	0.978227	0.822644	0.607144	0.553345	0.909981	-1.08869	-1.53032	-1.57253	-0.971131	-0.710094	-1.57143	-1.85866	-0.839405	1.27985	-0.338042	0.733668	0.862944	0.951819	0.823688	0.569713	-1.51908	-0.770075	-1.63818
A_23_P326020	CSMD3	chr8	q23.3	0.567218	-1.10896	0.383047	0.391818	0.390227	0.567218	0.456721	0.526553	0.102961	0.42824	0.125861	-0.521689	0.0816655	0.559658	0.743536	0.817711	0.696001	0.818765	0.507063	0.825662	0.256287	0.958808	1.48942	0.186488	0.78215	0.867718	0.642888	0.737087	-1.1034	-1.59169	-1.35674	-1.55281	-1.49232	-1.38219	-1.10393	-1.65646	-1.60511	0.24863	-1.29861	-1.16905	-1.19479	-1.27926	-1.14919	-1.64174	-0.496836	-0.948102
A_23_P116512	PRR5L	chr11	p13	0.566981	-0.445342	-0.544558	0.598903	2.27425	1.11044	1.43652	0.736078	0.518748	-0.119445	-0.112731	1.24397	0.4537	-0.268576	0.390098	0.279414	0.11937	0.0837319	0.343148	-0.522929	0.59111	1.59979	0.566981	0.81407	1.55259	2.36852	0.257092	1.00767	-0.787218	-0.700967	-1.11703	1.2713	0.109198	-0.370389	-1.11101	-1.23417	-1.66976	-0.403318	-0.0342398	-0.300293	-1.14974	-1.07581	1.79182	-0.355558	2.05166	0.229218
A_23_P253395	UNC13B	chr9	p13.3	0.566572	-0.243858	0.011942	0.883852	0.798094	0.816227	0.492002	1.1983	0.283625	1.10237	0.812153	0.0486596	1.1956	1.20842	0.851334	0.566572	0.320325	-0.364149	0.800426	-0.16745	0.559149	0.886864	0.504158	0.371511	-0.0836096	0.374067	0.473801	1.2668	0.867851	0.235023	0.371219	0.542218	-3.37964	-2.14835	-0.999811	-1.74433	-0.546167	-2.08422	0.953341	-1.45472	-1.45958	-3.28358	-0.392902	0.276113	-0.314166	-0.0167823
A_23_P318860	APLNR	chr11	q12.1	0.565814	-0.540933	-0.269554	2.08941	1.41164	2.16728	2.67885	2.22247	0.270108	1.95959	1.18462	1.51731	1.70405	0.812493	-0.991764	0.2037	-0.603246	0.738346	-0.171685	0.163129	-0.283122	0.950708	-0.245804	0.35609	-0.750582	-0.204058	-0.67954	0.565814	-0.552454	-0.529704	-1.01751	-0.218091	-0.123808	-0.468919	-1.2458	-1.44769	-0.893405	-0.368134	-1.42042	0.279323	-0.269554	-1.06774	-1.07967	-0.97467	-1.12788	0.0958158
A_32_P425998	IGFN1	chr1	q32.1	0.565449	-0.702504	-0.307213	1.05468	2.16019	1.93541	0.680508	0.336567	-0.971065	-0.149953	-0.247599	-1.03586	-0.738457	0.0670869	0.245727	-0.366757	0.96128	-0.212762	1.6476	0.415883	0.0460531	1.10498	0.635169	0.448206	0.565449	1.32066	3.33028	2.28272	-1.01056	-0.919131	-1.11187	-0.509733	1.07083	-0.445759	-0.622119	-0.195044	1.44242	-0.588854	2.05455	2.11676	0.499598	-0.81032	-0.714357	-0.837043	-0.901605	-0.933435
A_23_P41755	PURA	chr5	q31.2	0.565309	-0.615903	-0.186991	0.942469	0.565309	1.55365	-0.282109	0.585575	0.341197	0.436391	-0.198389	0.188631	0.889668	1.07544	0.429493	1.94585	1.67394	0.326255	-0.418523	-0.357616	0.756035	1.05351	-0.202042	1.38471	0.185858	0.974205	1.15183	0.529332	-1.85904	-1.38237	-0.998089	-0.752735	-2.01831	-1.14863	-1.53257	-1.71167	-1.24298	-1.05176	-0.778744	-0.586008	-0.386833	-1.07619	0.422538	-0.25636	-1.32961	0.168212
A_24_P202522	AQP4	chr18	q11.2	0.564056	-0.166038	0.280961	1.28141	1.38882	0.829232	1.15451	0.775151	-0.533584	0.41468	0.198913	0.183397	-0.0775477	0.289792	0.684428	0.896683	0.564056	0.325541	0.539782	-0.0995956	0.322834	1.23723	1.00828	0.745005	-0.0514175	0.315116	1.25461	1.07593	0.235549	-0.129366	-0.490516	0.436849	-0.0618537	-0.273538	-1.71261	-0.835082	-1.08657	-2.03114	-0.878117	0.335197	-1.44464	-0.503468	-2.423	-3.00628	-1.51383	0.288231
A_23_P252306	ID1	chr20	q11.21	0.563463	-0.392924	0.141521	1.30332	1.46811	0.329315	1.00034	1.09239	1.02291	0.294217	0.752976	0.0154007	0.655278	1.13833	-0.219952	1.1235	0.546827	-0.105564	-0.0460763	-0.200794	-0.318456	0.563463	0.942339	0.161176	0.287667	0.319967	0.753373	1.31961	-1.27246	-0.512836	-0.319936	-1.39709	-2.72035	-2.09562	-0.465911	-0.292747	-0.574506	-0.914487	-0.642582	0.498879	0.649115	-1.31681	-2.62537	-2.56	-2.79865	0.146901
A_23_P76136	TSPAN11	chr12	p11.21	0.56119	-0.470776	0.704654	0.438608	1.12546	0.305541	1.11816	0.44341	-0.46916	0.471721	0.584812	-1.39811	0.776623	0.463285	0.140211	0.621305	0.504408	0.798897	0.64522	0.845677	-0.715768	1.00674	-0.135936	0.157968	0.615652	0.582897	0.56119	0.886396	-0.480011	0.515647	0.171715	-0.18498	-0.668497	-1.22488	-0.744919	-2.14107	-3.57165	0.365346	0.463174	-0.461541	0.704654	-0.260092	-2.07805	-0.533115	0.606862	-2.30315
A_23_P110204	CXCL5	chr4	q13.3	0.5598	-0.197702	0.00700901	-0.121721	0.242274	0.374091	0.9977	0.177945	0.721418	0.5598	0.0455056	1.74467	2.95882	0.921657	0.894537	0.0230355	0.200316	-0.0760102	0.840901	-0.98537	0.336863	1.26141	2.28374	-1.92667	0.778106	0.578116	-0.184246	0.173172	0.0672169	-1.32474	-1.23676	-0.0266896	-1.29949	-0.824007	-1.20992	0.0345541	-1.40389	-1.888	-0.250393	-1.21786	-1.63929	0.254687	1.06849	1.34071	0.552638	0.286092
A_23_P166306	CBS	chr21	q22.3	0.558308	-0.320597	0.0489001	0.714994	0.652591	0.45233	0.638212	0.516301	-0.435643	-0.01884	-0.439544	-0.64776	0.558308	0.0796114	0.922324	-0.358677	0.72218	0.277422	0.437177	0.182378	1.01121	0.310735	2.84327	-0.0427379	1.02809	1.31235	1.48133	0.604213	-1.42776	-2.21843	-1.26425	-0.0235043	0.371349	0.337084	0.398743	0.295801	-0.382512	-1.85989	-1.4479	-0.542856	2.50544	0.653492	-1.10427	-1.5392	0.50487	-0.815569
A_23_P11843	LRRN2	chr1	q32.1	0.557955	-0.565758	0.255812	1.39917	1.25683	0.557955	1.05704	0.789823	0.0837972	1.19483	1.00413	0.631197	0.164339	0.303236	-0.83383	-0.596276	0.0617109	0.25204	0.0209158	0.580378	1.01777	0.323913	-0.654838	0.316261	0.642977	0.383145	0.794646	0.960614	-1.36499	-1.72531	-0.990902	-0.498293	-0.59117	-2.30385	-2.03474	-1.47201	-2.11218	-2.43355	0.00340379	0.463903	2.28284	0.847911	-2.53315	1.24862	0.189342	-1.69487
A_23_P169351	SH3GL2	chr9	p22.2	0.557454	-0.567442	0.208295	0.14497	0.740362	1.01993	0.502035	0.683153	0.0798685	0.325274	0.286571	1.1552	0.446956	0.557454	0.5543	0.855656	0.266091	0.0673766	0.71683	0.184418	1.09248	1.254	0.773718	1.18921	0.401526	0.689931	0.937632	0.379333	-0.541359	-1.50898	-0.956956	0.751105	0.15663	0.0352903	-1.64674	-1.43039	-0.666686	-1.85184	-0.121333	0.0990147	-1.53544	-1.39451	-1.21325	-1.30299	-2.04733	-1.03943
A_23_P72663	OPCML	chr11	q25	0.556561	-0.663372	0.497456	-0.799229	0.0167671	0.393414	0.746511	0.204205	0.585132	1.52484	0.578081	0.139569	1.34525	0.556561	1.42157	0.5442	0.039505	0.52686	0.779403	0.844669	0.0442724	0.70049	0.771013	0.727315	0.777868	0.603956	0.164954	0.510672	0.150853	-0.778694	-0.621364	-1.53957	-1.04568	-0.547746	-1.94536	-1.74791	-1.64817	-0.705381	-1.86502	-0.405674	-0.507377	-1.62574	-1.75756	1.88831	-1.46948	-1.81409
A_23_P215883	NCALD	chr8	q22.3	0.554933	-0.867909	0.227864	0.371651	0.750001	0.232794	0.861075	0.554933	0.270742	1.24316	1.0106	0.372534	0.260464	0.809223	-0.144853	0.157929	0.375326	0.50746	1.24558	1.06024	0.857546	0.613884	1.1706	0.227864	0.674763	0.937435	-0.0927661	0.455424	-1.14731	-1.01689	-2.02292	-0.539894	0.135342	-1.78896	-1.74952	-1.48127	-1.06167	-2.10754	-0.448888	0.206269	0.695294	-0.711025	-1.38716	-1.49605	-0.816199	-2.12393
A_24_P418408	FAM89A	chr1	q42.2	0.554911	-0.925706	0.656149	0.659738	0.365344	0.618972	0.6975	0.397565	0.906548	0.901391	1.44325	0.255355	0.674301	0.825363	0.126654	-0.144141	0.848137	0.902785	0.303258	1.46804	0.123673	-0.147837	-0.276614	0.286132	1.00417	-0.0369746	0.554911	0.101318	-1.52221	-1.70136	-1.94017	-1.15334	-1.87141	-1.11762	-2.54376	-1.62945	-1.32197	0.530985	-0.692152	-0.530967	0.664967	1.14873	0.299065	-0.998246	0.83627	-0.550901
A_23_P96285	REEP1	chr2	p11.2	0.552833	-0.784632	0.104707	0.762496	1.17815	0.303313	1.04879	0.78515	-0.282257	0.249862	-0.0899082	-0.0290088	0.503028	0.669256	0.233296	0.678226	0.245193	0.363892	0.523204	0.757494	0.646595	1.26125	0.552833	0.702342	0.220077	0.394408	0.915418	0.844679	-1.0037	-0.89026	-1.22013	-0.757998	-0.433498	0.671415	-1.44958	-1.19862	0.00542452	-1.22903	-0.651022	0.44291	-2.23451	-1.16376	-2.32015	-0.04742	-1.23766	-1.58094
A_24_P238131	SUSD5	chr3	p22.3	0.551632	-0.858571	0.663454	0.238146	0.268257	0.628955	0.689489	0.647577	0.246598	0.937666	0.826831	0.177886	0.22695	0.625175	0.844434	1.11301	0.358504	0.551632	0.414594	0.813922	0.660021	0.530181	-0.604367	0.884509	0.338442	0.244201	0.594039	1.1713	-0.709046	-0.815064	-0.332916	-1.65209	-1.67656	-1.73657	-1.19382	-1.46503	-1.17405	-1.39349	-1.37749	-1.67073	-1.41912	-0.895577	-1.44667	0.206137	-0.477565	-1.0439
A_24_P681011	HIPK2	chr7	q34	0.54949	-0.557008	-0.11046	0.54949	0.687013	0.855466	-0.860342	0.0330108	0.202534	-0.353356	-0.478842	-0.843806	0.24372	0.472097	0.575672	2.41883	0.715815	0.496229	-0.687607	-0.0840219	0.170913	0.740565	1.92817	0.563868	0.902033	2.16689	2.46732	1.79985	-0.631485	-0.389141	0.0880228	-0.20089	-0.536474	-0.0752927	0.408632	-1.24796	-0.674194	0.0190625	-0.671024	-0.638117	-2.28979	0.0447232	-1.37971	-2.31661	-0.716176	-0.0260244
A_23_P6150	FAM182B	chr20	p11.1	0.548012	-0.579918	-0.268436	1.51793	1.29839	-0.277085	-0.00283978	2.14126	0.245895	0.385654	-0.592903	-1.76889	-0.315423	1.44926	0.548012	1.4324	0.209595	0.0917733	-0.360005	-0.187755	-0.20171	2.5885	1.49715	0.452022	1.17006	1.87408	1.6278	1.48664	-1.45811	-1.49329	-0.986175	-0.620684	1.31271	1.54295	-0.633036	0.187383	-0.571322	-2.0333	0.255694	2.21031	-1.52826	-0.0896554	-1.24852	-0.402057	-1.54923	-1.3407
A_24_P342312	ODZ4	chr11	q14.1	0.54748	-0.74249	0.331246	1.33658	1.16661	0.481532	1.05375	0.54748	1.05921	1.23662	1.25078	0.618837	1.22241	0.606717	0.623092	0.662525	0.35032	0.343174	0.238019	-0.101722	-0.24269	0.0625147	0.570682	0.331246	0.281122	0.469215	0.113383	0.149207	-1.32888	-1.95465	-2.2562	-0.107244	-0.0181885	0.0917715	-0.982165	-1.6769	1.00581	-2.01471	-0.487182	-0.0276314	1.86297	1.64236	-1.42983	-3.11616	0.174617	-1.38928
A_23_P500421	EYA2	chr20	q13.12	0.542769	-0.728995	0.532858	1.00835	0.757022	0.65821	0.724074	0.802828	0.732026	0.978254	0.81438	1.08194	0.534301	0.361228	-0.416634	0.428242	0.394666	0.536111	0.538835	0.932715	-0.805527	0.542769	0.302491	0.511505	0.630866	0.389859	0.177945	0.552882	-1.51033	-1.24401	-0.864291	0.0701563	-1.84019	-1.20061	-1.85275	-1.11048	-0.341489	-1.07907	-1.88736	0.229964	1.46313	-1.79537	-1.25838	2.03318	-2.08118	0.317926
A_23_P257971	AKR1C2	chr10	p15.1	0.542525	-0.667632	0.241794	1.12259	1.25947	0.951138	-0.0389883	0.366053	1.04074	-0.628833	-0.129031	0.892972	2.08914	1.27087	0.542525	-0.287963	-0.055361	0.458408	0.690794	-0.46182	1.71796	1.68315	0.284653	1.67741	0.976779	-0.17348	0.428756	-0.136978	-1.11033	-0.176482	-1.07166	-0.226218	-1.79497	-1.45835	-1.77955	-1.74585	0.29887	-1.02157	-1.78029	-0.535659	-1.30865	-1.4169	-1.4101	-1.77412	-0.908647	-0.351003
A_23_P115726	SLC16A9	chr10	q21.2	0.542496	-0.112676	-0.055324	2.22835	2.2385	0.950813	0.679178	0.510547	-1.18014	0.46837	0.654822	-0.413906	-0.0285779	-0.00499493	0.612198	1.47449	0.648024	-0.149843	1.29169	-0.00242532	0.478446	1.48602	0.407611	-0.0237631	0.387872	0.542496	1.05816	1.2288	-0.576455	-0.501964	1.07151	0.0316364	1.0811	0.422942	-1.90577	-1.6916	-1.66325	-1.59162	-0.055324	0.97039	-2.82822	-0.950396	-0.113359	0.508173	0.649482	-0.864579
A_23_P212050	BCHE	chr3	q26.1	0.541842	-0.581249	0.665357	0.052521	0.832672	0.236282	0.174408	0.415186	0.266458	0.56183	0.508205	-0.124157	-0.267064	0.34671	-0.0548857	1.04197	0.373783	0.222157	0.735338	0.921679	0.786346	0.637472	0.647151	1.02146	0.659874	1.0033	0.541842	0.689674	-1.01747	-1.73004	0.0513486	0.0537752	-0.0704018	-0.521877	-0.628948	-0.833522	-1.69979	1.22583	-0.909956	0.0152772	0.710434	-0.336752	-2.56192	-2.76827	0.447782	-0.349915
A_24_P271149	IGLON5	chr19	q13.41	0.541411	-0.969334	0.32346	0.0495382	0.766816	-0.129071	1.05213	0.356733	-0.967489	-0.210596	0.542573	-0.047868	1.86801	1.8019	0.429579	0.193278	0.674919	1.11	0.875143	2.02537	0.957407	0.367503	1.41181	0.485097	0.820146	0.541411	0.522322	0.137128	-0.0413027	-1.57904	0.109189	-1.44072	-1.61791	-1.1716	-0.978574	-0.960094	-1.38245	-1.5857	-1.61354	0.115316	-1.40247	-1.0742	-1.13404	-1.08872	0.762659	-1.19203
A_23_P85015	MAOB	chrX	p11.3	0.540661	-0.59596	0.169077	-0.382573	0.371261	1.59584	1.76043	1.33477	0.564812	1.21651	1.01508	0.995974	1.15809	0.98388	0.316038	0.0362589	0.540661	-0.0368453	0.547519	-0.227719	0.736112	1.31326	-0.144952	0.755888	0.474524	0.497638	-0.392335	0.15962	-0.144092	-1.68972	-1.62933	1.16062	0.907293	0.615259	-1.49378	-0.666292	-0.0882637	-1.62645	0.338652	0.791309	-0.295223	-1.08033	-0.690103	-1.988	0.230579	-1.84902
A_24_P914638	PCDH7	chr4	p15.1	0.536643	-0.903696	0.378024	0.40805	0.28636	0.262488	0.40321	0.609014	-0.852867	0.655178	0.284614	0.368023	0.536643	0.451986	0.686007	0.208288	0.287268	0.470717	0.703779	0.676519	0.614209	0.257986	0.777896	0.939871	0.548091	0.799048	0.754422	0.852586	0.895677	1.02062	1.20579	-0.679012	-2.43903	-1.63455	-1.3389	-1.87908	-1.64177	1.16978	-1.88073	-1.22648	1.15164	1.2436	-2.15221	-2.56775	-1.47992	-1.37585
A_23_P168771	CCDC146	chr7	q11.23	0.534924	-0.514567	-0.199093	2.84593	0.534924	0.57475	1.65016	0.659203	-0.381767	0.234391	-1.03925	-0.019327	-0.656224	0.177922	1.03204	0.462339	0.27398	-0.432969	-0.818237	0.0180521	1.08636	2.14801	1.20838	-0.276845	0.72335	1.66793	1.08378	0.369024	-1.1053	-1.46292	-0.339794	-0.536127	-1.28216	-0.191234	-0.493007	-0.637312	0.294473	-0.0627726	0.920551	2.89038	0.0472786	-0.199093	0.274934	0.154746	-0.00508404	-1.3059
A_23_P350678	C10orf79	chr10	q25.1	0.53473	-0.580558	-0.582457	0.379314	0.0897062	0.788565	1.45848	0.104985	-0.43402	-0.137797	-0.582457	1.14645	-0.906511	0.53473	-0.616532	1.61069	0.940957	-0.178052	-0.665185	0.775139	2.18334	1.69407	0.312664	0.0458491	1.60533	2.37442	2.53947	-0.48178	-0.816733	-0.88928	0.050927	1.02841	-0.897393	-0.66871	-1.18478	-0.735919	1.56211	-0.669083	0.900372	0.444878	-1.29312	0.415826	1.85078	1.13249	0.844444	0.0255525
A_23_P340822	TMEM146	chr19	p13.3	0.534712	-0.576414	-0.218898	0.447571	0.234746	0.865255	1.13339	-0.534989	-0.148338	-0.558285	-0.712665	0.534712	0.197348	-0.153048	2.70206	0.685831	-0.585858	-0.0624799	2.06254	3.24072	-0.323333	2.80215	1.27135	-1.25202	1.1529	0.983235	0.855795	-0.476354	-1.01948	0.48105	-0.407504	-0.387917	-0.549942	-1.13136	-0.157238	-0.840773	0.984535	-0.694652	-0.101671	1.49514	-0.728312	0.403666	-0.909541	-0.396543	-0.702573	-0.602886
A_23_P211468	TIMP3	chr22	q12.3	0.531373	-0.431924	0.309195	0.866434	0.36746	0.415776	0.552276	0.08159	1.08071	0.574767	1.02904	0.839185	0.0305018	0.531373	0.234627	0.588139	0.357088	-0.186332	0.448623	-0.0647016	0.786705	-0.225312	0.478038	0.190696	1.50077	0.743296	1.37923	1.74677	-1.40092	-0.744943	-1.22868	-0.163741	-1.7603	-0.921403	-1.30301	0.417941	0.856106	-0.0730105	-1.81218	0.260567	0.148512	0.197415	-0.373517	-1.61979	0.0879754	-0.500509
A_23_P109286	GRIK1	chr21	q21.3	0.525064	-0.929399	0.808214	1.23302	1.34335	0.525064	1.08036	1.02661	-0.225684	0.86729	0.180212	-0.297772	0.0968861	0.710905	0.424564	-0.488417	0.0742945	-0.350817	0.596223	0.730662	-0.084645	-0.123494	0.525301	-0.242843	-0.450624	-0.23375	0.945142	1.10464	-1.21664	-1.77793	-1.65506	-1.22899	-1.64942	-1.20877	-1.24422	-1.29849	-1.42821	-1.44623	0.616483	0.940901	-1.58318	1.46746	-1.26292	-1.12546	-0.428544	-1.17012
A_24_P204386	MTMR9L	chr1	p35.1	0.524212	-0.58457	0.452272	-0.310458	0.352564	0.498193	0.602322	-0.555609	-0.246457	-0.370392	0.248876	0.0257877	0.89198	1.24454	0.650048	0.810684	0.755374	0.319002	0.485906	0.114262	-1.13345	0.524212	1.87923	0.219826	0.561222	1.32352	0.974438	1.11765	-1.13101	-0.2117	-1.13955	-1.82065	-1.15384	-1.74423	-2.44838	-1.53248	0.301773	-2.01111	-0.19125	-2.2772	0.1726	0.798685	-1.62038	-1.89354	-0.304044	-0.136819
A_23_P53697	KCNA6	chr12	p13.32	0.524184	-0.783829	0.189038	0.854962	1.84916	1.05446	1.55812	1.28038	-0.393726	0.607445	0.252553	-0.196304	0.444294	0.39778	1.53869	1.05631	0.0964443	0.636885	0.433264	0.524184	1.55375	1.41011	-0.000202091	0.522194	-0.0876427	0.06929	0.300786	-0.118492	-0.875386	-1.70269	-1.82415	-1.03964	-0.399882	-0.773927	-1.77536	-2.08252	-0.98231	-0.793731	-1.22783	-0.245281	-1.04903	0.283755	-1.24083	-1.68103	-1.24581	-2.13799
A_23_P103812	FAM5C	chr1	q31.1	0.520193	-0.351129	0.684922	0.351255	0.605114	0.520193	0.547693	0.458689	-0.0476293	0.627469	0.676318	0.04303	0.172896	0.564794	0.590748	0.211061	0.380512	0.471143	0.845277	1.0054	0.576842	0.499135	0.640249	0.21899	0.704876	-0.101538	0.386792	0.627874	-1.00546	-2.37614	-2.16459	-1.89187	-2.28669	1.03204	-2.15224	-2.1434	-0.662472	-0.947679	-2.13919	0.389404	-1.40549	-0.789307	-0.806965	-2.11698	0.97155	-0.340266
A_24_P297119	OLIG1	chr21	q22.11	0.519467	-0.222895	0.454831	0.311014	0.420218	0.383933	0.596899	0.338962	-0.188308	0.350939	0.172414	-1.14841	0.0933223	0.518359	0.878126	0.677797	0.704835	0.555516	0.797731	1.05299	0.473763	0.824897	1.06631	0.46191	0.666516	0.517468	0.519467	0.611848	-0.749786	-0.679801	-1.14691	-1.62227	-2.94935	-0.960852	-3.17595	-2.23051	-2.66256	-2.45671	-1.25014	-0.120491	-0.54751	-0.114632	-2.44388	0.301746	0.389247	0.0163547
A_23_P214222	MARCKS	chr6	q21	0.512087	-0.380057	-0.176284	-0.828124	1.11629	1.10088	0.681313	-0.102175	0.313405	0.326749	-0.176284	-0.0260329	-0.128189	0.473257	0.209343	2.22031	0.789335	0.320247	1.38612	-0.257856	0.285485	2.0656	1.73254	0.135246	0.512087	1.14121	2.05304	1.62171	-1.18857	-0.181648	-0.210134	-0.858424	-0.134463	-0.0937172	1.04513	-0.957005	-0.0998242	-0.312354	-1.5576	-1.28864	-0.649982	-0.91565	-0.460653	-0.665291	-1.07676	-1.28421
A_23_P72025	SLC25A20	chr3	p21.31	0.511087	-0.392656	0.126407	0.950422	0.865861	0.466941	0.290851	-0.177099	0.664006	0.0852799	-0.18583	0.822686	0.511087	0.0847391	0.803633	-0.599044	-0.284036	0.0353594	0.84466	0.411218	1.05633	0.898214	1.50108	1.18503	-0.0117556	0.11065	1.33691	0.735595	-0.594788	-0.338756	-0.446556	-0.482111	-2.80729	-0.476911	-1.91096	-0.574239	-0.606482	-1.62189	-0.512811	-0.895886	0.0836467	-0.957724	-1.8183	1.18027	0.437748	-0.185093
A_24_P83738	ASTN2	chr9	q33.1	0.510076	-0.602368	0.48289	0.740956	0.757611	0.809878	0.421436	0.676682	0.813815	-0.139035	-0.583977	0.428578	0.473634	0.478251	0.771898	0.335957	0.249814	0.510076	0.647408	0.367468	1.05298	0.507013	0.632607	0.609349	0.802397	0.340994	0.492565	1.05499	-1.85331	-2.00509	-1.61392	0.492608	-1.44476	-1.24811	-1.67621	-0.665212	-1.75188	-2.21015	-1.31437	-0.773728	-1.68536	0.48289	-2.55957	-2.43464	-1.93741	0.874988
A_23_P135576	PTPRT	chr20	q12	0.508875	-0.846825	0.674621	1.0918	1.45295	0.487704	0.374285	0.794758	-0.71082	0.752269	-0.52883	-0.284531	0.193363	0.770567	-0.0872686	0.357506	0.465566	0.664007	0.999192	1.08193	-0.243531	-0.776375	0.508875	0.0257086	0.759701	0.434215	0.944806	1.37814	-0.723874	-0.595045	0.108599	-1.73044	-0.794242	-1.16855	-1.46168	-0.899409	-1.79732	-1.76296	-1.24023	0.446628	-0.125934	1.04422	-1.66794	-1.12674	-1.0467	-1.43727
A_24_P201702	CLEC2B	chr12	p13.31	0.506226	-0.639485	0.319694	0.365331	0.255847	0.260062	1.15278	0.571736	1.88516	1.6057	1.83424	1.45302	0.939351	1.08602	-0.612661	0.951076	0.233466	0.631222	0.0298936	0.507505	0.864118	0.506226	-0.699999	1.77513	0.310604	-0.00521447	-0.857431	-0.963655	-0.81206	-0.292777	-0.314988	-0.83643	-1.0025	-0.505705	-1.78403	-0.433516	-0.0162159	-0.200244	-1.24911	-0.703916	-1.03167	-0.862212	-1.78233	-0.807976	-0.698207	0.39629
A_32_P75264	TMEM26	chr10	q21.2	0.50521	-0.553422	-0.615615	-0.326285	0.647101	0.394818	0.0827713	0.36632	0.50711	1.53726	0.534961	1.49239	0.966836	0.150014	1.87097	0.50521	2.08603	-0.662843	1.67551	-0.720397	-0.941933	0.46851	0.105835	2.21131	0.185711	0.563406	2.11865	1.67011	-0.282545	-0.701396	-0.692987	-0.690381	0.372094	-0.232949	-0.218657	0.37199	2.63367	-0.101961	-0.737248	-1.33275	-1.34959	-0.882082	1.11604	-0.885178	-0.961006	-0.575635
A_23_P101671	ATCAY	chr19	p13.3	0.502883	-0.364595	0.35776	-0.155186	-0.108599	0.184582	0.105632	-0.0242202	0.262192	0.0427829	0.221187	0.306785	0.502883	0.892557	1.10417	1.36698	0.602284	1.06523	0.599612	0.796168	0.70479	0.430109	1.4199	0.275762	0.733642	0.435956	0.232318	0.538405	-0.0118054	-0.907279	-0.919176	-1.70633	-0.316446	-0.706043	-2.10392	-1.19071	-0.264191	-1.60409	-1.24849	-0.412745	0.099305	-2.66685	-2.10778	-3.04991	0.563382	-2.6504
A_23_P32847	GRID2	chr4	q22.1	0.498286	-0.596908	0.345671	0.714302	0.69919	0.707035	0.360756	0.46172	0.134903	1.1572	0.23641	-1.05618	0.488267	0.689269	0.729113	0.498286	0.476282	0.0897795	0.542718	0.409876	-0.0344273	0.207019	0.570726	-0.0803197	0.484017	0.803543	1.73998	1.97268	-2.10156	-2.36167	-2.14313	-1.5141	-0.118105	0.167539	-0.605742	-1.09003	-0.442632	-0.309427	-0.454798	0.0575695	-0.203763	1.6557	1.16729	-2.19442	-0.588074	-0.850002
A_24_P158718	DTX4	chr11	q12.1	0.495696	-0.45592	-0.278846	0.53279	1.19926	0.106842	0.323872	0.351565	-1.21364	0.380861	-0.642536	-0.43277	0.0654099	0.185262	1.15854	2.12869	1.15862	0.495696	0.17707	0.174011	1.20878	1.37931	0.776578	0.685126	0.28997	0.949078	1.74513	1.35536	0.593961	-1.14021	-0.105632	0.0933042	0.308106	1.5145	-0.487481	-1.40086	-0.280817	-1.15882	-1.66862	-0.143089	-0.609646	1.16272	-2.40984	-1.3508	-1.51666	-0.988244
A_24_P106542	RSPO3	chr6	q22.33	0.495261	-0.717847	-0.558671	1.43082	3.05965	0.725688	1.57311	1.41107	0.306037	0.749807	-0.0826386	0.0714056	0.812267	0.197343	1.87859	-0.247871	0.60193	0.0642409	0.495261	0.241326	-0.49845	0.342801	0.100763	-0.289045	0.0392789	0.310242	4.00322	1.59349	-0.896791	-0.773787	-0.680999	-0.872574	-0.892992	-0.869859	-0.71416	-0.893391	-0.397087	2.83789	-0.682327	-0.559823	-0.782333	0.0166449	-0.265772	-0.761358	-0.950574	-0.874586
A_23_P149448	HES4	chr1	p36.33	0.493305	-0.665571	-0.0784539	0.784446	0.436246	0.312274	1.10139	1.01058	0.235695	0.067605	0.152455	-0.642723	0.493305	1.177	0.390372	1.30746	1.596	0.478141	1.27817	0.444824	0.0896771	0.81138	1.13061	0.138237	0.234489	1.09083	0.373923	0.943352	-0.887293	-0.672103	-0.629988	-1.03827	0.732811	0.142127	-1.40898	0.0229613	0.0696608	-2.49462	0.626384	0.714802	-1.38922	2.40387	3.88958	-1.56424	-0.740795	-0.52211
A_23_P120243	HOXD1	chr2	q31.1	0.492679	-0.783554	-0.829611	0.230402	0.131074	0.087696	-0.0475272	0.278529	-1.10542	0.492679	0.123092	-0.317903	0.377169	0.257455	0.820958	-1.00192	2.19917	1.20182	-0.197723	0.750405	1.25941	0.786544	1.41169	0.953497	1.79376	2.13989	2.79844	1.62766	-1.05211	-1.00079	-0.99792	0.0023888	-0.719931	-0.162223	-0.823944	-1.04196	-1.10843	1.35106	-0.352891	-0.469232	-0.829611	-0.972411	-0.799301	-0.932404	-0.927487	-0.821555
A_23_P39755	B3GNT7	chr2	q37.1	0.491001	-0.795842	0.732566	-0.738261	0.095705	-0.642803	-0.0389907	0.146084	-0.807408	0.430945	0.681398	-0.27223	0.215243	0.385159	1.23853	0.520808	0.775136	0.678824	0.796453	1.09853	0.491001	0.0538823	1.2356	1.16477	0.723635	0.649305	0.746544	1.51285	-0.662897	-1.39164	-0.708595	-1.12717	-1.30011	-1.21168	-0.899036	-0.906153	-1.61792	-0.855146	-1.34842	-1.38803	-1.65398	-1.95771	-1.67012	0.495022	-1.26438	-0.925934
A_23_P202484	ZNF503	chr10	q22.2	0.49004	-0.575082	0.244719	0.375979	0.844011	0.0490167	0.516984	0.273883	0.296797	1.63083	1.00878	1.37857	1.06095	0.731057	-0.374914	0.450954	0.705688	0.746494	0.141425	-0.185209	0.502635	-0.0296385	0.288696	0.0187616	1.27898	1.53087	0.137523	0.49004	-1.10716	-1.51356	-1.95839	0.46408	-0.215634	-0.666014	-1.22331	-0.534956	0.143624	-0.0584384	-0.0252919	0.143086	-1.09625	2.03787	-1.56449	-2.79822	-0.162938	0.0363637
A_23_P417918	PENK	chr8	q12.1	0.489865	-0.88772	0.155832	-0.0820998	0.288981	-0.740888	1.01102	0.489865	2.15006	-0.352205	0.697421	1.63797	0.97213	1.82281	-0.0548938	0.164724	0.24443	0.188244	1.42994	1.84838	-0.28742	0.853879	-0.421059	0.803787	0.600586	0.698864	0.960427	-0.329309	-1.08612	-1.16349	-0.840128	-0.935692	-1.01886	-0.252468	-1.07622	-0.864619	-0.715843	-0.944877	-1.14694	-0.313192	-0.88679	-0.914107	-0.857703	-0.202429	-1.29657	-1.08788
A_23_P205894	ACTC1	chr15	q14	0.489483	0.0726886	-0.968416	0.482402	1.16527	0.608662	0.489483	0.946836	0.319538	0.323981	0.404784	0.782509	0.219756	0.277846	1.58429	0.881795	-0.426663	0.350148	2.29127	0.466441	0.356361	0.295958	1.12042	0.346732	1.10457	1.2473	1.60609	0.460633	1.0006	0.300481	-1.3314	-1.17479	-1.45243	0.549761	0.78477	0.437908	-0.988581	0.433478	-1.12685	-0.868299	-1.27087	-1.50515	-1.51695	-1.52474	0.122315	-1.14236
A_23_P10980	LPHN3	chr4	q13.1	0.485899	-0.279521	0.414364	0.361668	0.532747	0.447966	0.474927	0.563299	0.31317	0.478013	0.456486	-0.17236	0.419522	1.06774	0.714235	0.57278	1.21972	0.447691	0.587744	0.703171	-0.00317361	0.366388	0.694501	0.0770901	0.750509	0.165964	0.485899	0.894956	-1.65163	-2.87973	-1.96299	-0.203915	-0.909565	-0.265354	-0.733673	-0.477359	-1.35197	-1.1303	-2.08544	-0.912138	-1.875	0.754212	-0.873475	-3.20583	-0.26215	-0.166025
A_23_P300847	DIO3OS	chr14	q32.31	0.483742	-0.589921	-0.237441	0.175536	2.23617	1.61365	2.68185	0.833516	0.921533	2.32675	1.65305	0.667759	0.938189	0.81883	-0.144897	0.562265	-0.864091	-0.44037	-0.064734	-0.283487	-0.77982	0.236952	-0.536967	0.368481	-0.475068	0.171026	0.483742	2.27547	-0.494122	-0.506338	-0.781909	-0.403191	-0.419357	-1.22403	-1.26701	0.035152	-0.168662	-0.66859	0.927	0.383845	2.24031	2.47257	-0.59431	1.87387	-0.474568	-1.10797
A_23_P53110	TUB	chr11	p15.4	0.481098	-0.876634	0.170655	0.569547	0.662833	0.374045	0.00334917	0.0844601	-0.0144364	-0.454467	-0.142393	-0.244453	0.254206	0.0483108	0.636268	0.166385	1.08073	0.0804596	0.498438	0.372931	0.481098	1.4899	0.586544	0.676329	1.20603	1.41292	0.655373	0.655732	-1.83976	-2.50032	-1.94767	-0.943636	-1.07139	-0.904489	-2.33501	-1.02588	-0.358463	-1.62245	-0.332053	-0.0729177	-1.2922	-0.536618	0.81055	-2.48377	-1.03119	-0.848778
A_23_P19816	RNF32	chr7	q36.3	0.478772	-0.435487	-0.549994	0.316901	1.87989	0.328342	0.57006	0.478772	-0.14277	-0.565734	0.400357	1.46249	-0.331766	0.881662	-0.167694	1.88412	1.32359	-0.0257082	0.0382644	-0.0220227	1.796	1.766	3.2244	0.340788	0.930118	1.39381	0.144271	-0.718412	-1.45659	-1.27791	-1.07563	0.0041004	-0.4535	-0.51716	-0.614666	0.0732682	-0.549994	1.14494	-0.469648	1.23137	-1.57103	0.191993	0.215735	-0.626582	0.766989	0.0681668
A_32_P67143	CCDC26	chr8	q24.21	0.473939	-0.672948	-0.427192	-0.921904	0.833482	0.606579	0.153822	0.439732	0.0877628	-0.251592	0.496246	0.243609	0.502659	0.468077	2.31765	2.71586	1.19855	0.363522	1.15043	0.429681	1.996	1.10665	2.48865	0.596361	0.473939	1.37116	0.39172	0.136508	-0.722062	-0.691516	-0.976493	-1.00544	-1.00873	-0.231153	-0.301391	-0.84761	-1.11481	-0.917147	-0.911105	0.119762	-0.12452	-0.887478	-1.077	-1.07907	-0.933026	-0.776482
A_23_P20316	CA3	chr8	q21.2	0.472654	-0.573115	-0.450112	2.70597	0.880754	1.38863	2.02009	-0.434966	1.10307	1.78978	2.10963	0.973281	1.05089	0.0210269	0.0926375	0.217445	-0.286231	-0.359924	2	-0.29945	-0.218001	0.00127737	-0.165779	-0.279581	0.470033	0.472654	1.3917	1.43278	-1.06237	-1.42626	-0.897272	-0.391922	-0.332203	1.31132	0.102264	-0.564805	2.48338	-1.22584	-0.873579	0.668096	-0.798955	-1.05601	1.16508	-1.23899	-0.479624	-1.11716
A_23_P208334	PDE4A	chr19	p13.2	0.467221	-0.587766	0.377702	0.35426	0.265585	0.642572	0.245922	0.453313	-0.393686	0.546166	0.402194	0.661895	0.188407	0.477643	0.5086	-0.265738	0.541604	0.338938	0.537661	0.467221	1.13572	0.736955	0.76807	0.674429	0.43359	0.597562	-0.226101	0.4	-1.10663	-1.63135	-1.17263	-0.618834	-2.07946	-1.78902	-1.73031	-0.415011	-1.75957	-1.1502	-2.0277	-0.726802	-1.30302	2.84461	-2.59292	-0.93309	0.465524	-0.556699
A_32_P82111	LRFN2	chr6	p21.2	0.464569	-0.894196	0.765924	0.5231	1.18087	0.611613	0.493632	0.6442	-0.332301	-0.0210204	0.765924	-0.509045	0.654398	0.636709	0.304245	0.709756	-0.082337	-0.0355323	0.693019	0.244064	-0.256412	0.723763	0.411431	0.545819	0.464569	-0.116141	0.265769	0.609751	-0.0197163	-0.680719	-0.0355664	-1.79045	0.879878	1.07269	-1.86903	-1.28011	0.459289	-1.64267	-0.966018	0.390136	1.42388	-1.18894	-1.65868	-2.021	-1.69062	-1.25306
A_23_P19142	KCNMB1	chr5	q35.1	0.461549	-0.458491	-0.0974462	1.67981	1.51669	1.89927	1.27563	1.83708	1.46396	0.579291	1.9728	0.251323	0.196948	-0.13565	0.425947	-0.538016	-0.263833	-0.0283731	1.17566	0.290116	-0.196082	0.497058	-0.680452	0.0168764	0.461549	0.229095	1.41616	1.41149	-0.592211	0.114888	-0.342237	-0.929109	-1.1071	1.04398	-0.73306	-0.629142	-0.843993	-0.381196	-0.0974462	-0.601701	2.46833	-1.93224	-2.39621	-0.196798	-1.25263	0.207764
A_23_P391844	CXorf22	chrX	p21.1	0.460908	-0.193357	-0.627873	0.460908	0.258991	0.0711888	1.374	1.36178	0.179644	-0.282576	0.0322235	0.885372	-0.166961	0.877005	0.402754	1.00846	0.230801	1.35028	-0.150395	1.63346	1.35726	0.564477	3.46692	-0.886312	0.566105	0.112993	-0.54119	-0.777209	0.519358	-1.08292	-1.13484	3.63695	-0.971405	1.2955	-1.58616	0.518172	-0.876217	-0.609044	-1.1776	0.0376752	-0.14494	0.244152	1.4937	-0.585646	0.852571	-0.98148
A_24_P282227	CA8	chr8	q12.1	0.460663	-1.1486	0.25151	0.411662	-0.0105076	0.084069	0.140265	0.703076	-0.00253665	0.460663	-0.149754	-0.145162	0.101169	-0.395853	0.189233	0.67861	0.605813	-0.335192	0.775846	0.314302	0.570828	0.748358	2.37267	0.728352	1.03935	1.68698	0.5524	2.03297	-1.53279	-1.49892	-1.36858	-1.61268	-1.42386	-1.17164	-1.81708	-0.76738	-0.326809	-1.36501	0.709049	0.675193	-1.54693	0.279975	-1.48592	-1.12557	-1.20812	-1.19394
A_23_P136504	SLC25A21	chr14	q13.3	0.460463	-0.814479	0.0794583	0.595436	1.57546	0.473597	0.460463	1.6957	-0.81236	0.056272	2.01338	-0.596543	0.729665	0.207933	1.56675	2.32013	0.380091	0.00421193	1.37427	0.152826	1.1469	0.214323	0.253875	1.1554	0.0265032	-0.423445	0.911814	1.08513	-1.10969	-1.05488	-1.05044	1.21186	-1.20977	-1.14646	-1.18099	-1.10283	-0.866038	-1.19919	-0.452785	-1.24016	2.84091	-0.940442	0.563575	0.308437	0.116491	-0.757244
A_24_P29401	PIK3R1	chr5	q13.1	0.45946	-0.651389	0.325859	0.62671	0.67565	0.280363	0.45946	0.09591	-0.382101	0.33503	-0.221653	-0.351395	-0.0863427	-0.459769	0.74963	0.306265	0.394686	-0.589189	0.904278	0.409575	1.73542	1.2355	1.09896	0.546858	1.42293	0.668162	0.477072	0.919378	-1.67573	-0.951391	-0.119188	-0.809492	0.609867	-0.546599	-1.78557	-2.06139	0.76844	-1.36895	-1.37843	-0.598649	-2.25124	-0.746559	-0.130632	-1.81854	0.952975	-0.83817
A_23_P217704	GYG2	chrX	p22.33	0.457783	-0.0813989	-0.101114	1.65237	0.96211	1.70171	1.85655	1.2223	-0.421517	0.617814	1.01626	1.38367	1.27999	-0.10414	0.00777813	1.31473	0.437229	-0.0778509	0.0562786	0.0591712	0.457783	0.998665	0.347366	0.397312	-0.152272	0.360176	1.17636	-0.227606	0.178954	0.174707	0.440101	1.0532	0.559713	-1.38756	-0.177506	-1.4886	-2.10253	0.427759	-0.900202	1.09455	0.172217	-0.556572	-2.80495	1.30529	1.11544	-0.112498
A_23_P360379	EGLN3	chr14	q13.1	0.453261	-0.570269	-0.0429422	1.87297	1.85984	2.03862	1.17455	1.81309	1.03317	1.2801	1.62518	1.43727	0.441919	-0.73387	0.498229	0.453261	-0.0802768	-0.522358	0.993363	-0.107195	-0.439213	0.153504	0.209124	1.011	0.430801	-0.829024	-0.00307	0.955048	-0.633302	-1.98993	-1.94685	1.00764	-0.41552	0.18521	-1.54166	0.86661	-0.168215	-0.8821	0.492343	0.116853	-0.129015	0.467061	-1.03772	-0.660907	-0.821348	-1.70437
A_24_P113725	SOX3	chrX	q27.1	0.449486	-1.14092	0.4829	0.475109	0.905158	0.435642	0.103502	0.688446	-0.023756	0.343791	0.878881	0.444142	0.087355	-0.882022	0.554814	0.618233	0.203287	0.408546	0.8227	1.09731	0.402898	0.647218	0.449486	0.0756517	1.03187	0.584006	0.266397	1.12614	-1.71095	-1.29741	-1.37892	-1.18164	-0.172983	1.14833	0.17217	-1.23221	-0.00866684	-1.8413	0.4829	1.56737	-1.40872	1.92837	1.56486	1.37721	-0.545031	-1.46876
A_23_P401606	EDIL3	chr5	q14.3	0.447559	-0.902257	0.565373	-0.28161	-0.0330536	0.702447	0.816966	0.620501	0.447559	0.920154	0.743741	0.589632	1.05827	0.57667	0.329158	-0.649291	0.936647	0.85904	0.150877	0.719669	1.37425	0.388415	-0.25147	0.0127909	0.0427144	-0.182082	-0.34933	0.166071	-1.52272	-0.301742	-1.53744	-0.362253	-1.66191	0.206054	-1.65742	-1.77476	-0.509903	-0.98045	-1.51916	-0.824064	-0.643358	0.565373	-2.07143	-1.32538	-1.93109	-1.74529
A_32_P42574	C1orf198	chr1	q42.2	0.446054	-0.66032	0.0244711	1.40759	2.21333	1.56359	0.794737	1.48782	0.0304015	0.900675	1.30631	-0.000770088	0.149735	-0.255252	0.284788	-0.0433263	0.446054	0.283635	0.257037	-0.149035	1.45826	1.24333	0.111126	0.349819	0.928329	0.245307	1.86723	1.61228	-0.835686	-1.04937	-0.163735	-0.472002	-0.494916	0.692384	-0.729544	-1.28924	-1.93568	-0.664397	-0.533355	0.179736	-1.85748	-0.870796	1.87326	-0.700624	0.312459	-1.89943
A_23_P207461	CA10	chr17	q21.33	0.445939	-1.03837	0.777395	-0.232302	0.360062	0.184949	0.2814	0.307644	0.49147	-0.00164433	0.499608	-0.17193	0.562548	0.968007	0.752083	0.10689	0.649742	0.459691	0.713493	1.01214	0.428151	0.595162	1.17641	0.655114	0.728697	0.054626	0.0384055	0.445939	-0.91131	-1.7686	-1.62726	-1.59997	-1.66204	-1.80678	-1.80648	-1.61393	-1.8183	-1.63582	-1.5725	-0.456509	-0.936897	1.07476	-0.352328	-1.7924	-1.22591	-0.93958
A_23_P42397	PRSS35	chr6	q14.2	0.444336	-0.68558	-0.506869	1.15538	2.41637	0.962107	1.95441	0.166941	-0.109119	0.0375534	0.0290114	0.0646476	-0.1223	0.0349199	0.954201	0.857392	-0.175064	-0.235821	1.52425	-0.0247242	0.703856	1.8861	1.364	1.15831	-0.0765763	0.374404	2.63503	0.444336	-1.24035	-1.05038	-1.15744	0.598816	1.02743	-1.28839	-1.168	-1.37292	-0.680291	0.285359	-1.5897	-0.646618	-0.584614	-0.506869	-0.116607	-1.0206	-1.18395	-0.724542
A_23_P28834	PHACTR3	chr20	q13.32	0.443039	-0.441935	0.60023	0.221402	0.532219	0.42756	0.293007	0.348405	0.0436009	0.312336	0.568724	-0.0765199	0.305242	0.294971	0.579308	0.443039	0.371421	0.510477	0.441756	0.672063	1.08364	0.461695	0.873223	0.64565	0.840457	0.721914	0.761801	0.716027	-1.30857	-1.87659	-1.84534	0.406866	-0.531465	-0.524777	-2.63966	-2.1714	0.0399618	-1.78749	-0.736062	-0.0311639	-1.63577	-2.13679	-2.18198	-1.83635	-0.0383993	-1.42577
A_24_P131646	MYL3	chr3	p21.31	0.442308	-0.888807	0.00809916	0.549307	1.31261	2.25051	1.36895	1.64796	0.283626	-0.0222252	0.0541685	1.89306	0.924972	0.0629802	0.442308	1.36078	0.100527	0.526984	0.0973761	0.146943	0.219139	0.37708	-0.685928	1.01327	0.951238	1.99943	-0.343507	0.402977	-1.3025	-0.78935	-1.03505	0.109433	-1.14195	-1.07944	-1.31078	-1.69672	-0.683583	1.03777	-1.49205	-0.0101283	-1.42655	2.05094	0.196685	-1.37996	-1.53488	-0.883566
A_23_P210100	CYP26B1	chr2	p13.2	0.440282	-0.88464	0.136254	0.440282	0.0513552	0.0955305	0.244359	1.04515	0.552503	0.414893	0.98676	0.418481	1.05249	0.803356	0.274625	0.727954	0.69863	0.880443	0.157172	0.171236	0.887152	-0.100068	0.694201	0.431376	0.347703	0.410524	0.631709	0.767797	-1.20943	-1.58704	-1.47656	-1.02297	-1.66269	-1.09847	-1.3909	-0.844038	0.0548396	-0.154657	0.0238791	-0.0726666	-0.306096	2.34818	-0.661841	1.77213	-1.27389	-1.95671
A_24_P153643	DOCK3	chr3	p21.2	0.437919	-0.630541	0.309855	0.587971	0.129709	0.32923	0.116552	0.197143	0.39195	0.279995	-0.00477308	-0.350983	0.542089	0.732119	0.343782	0.199689	0.87601	0.597603	0.192911	0.650109	0.231135	0.536544	0.714013	0.151645	0.819332	0.655463	0.437919	0.835597	-1.69903	-1.6888	-1.2207	-0.836494	-1.4691	-1.05366	-1.73486	-1.8024	-1.4498	-1.89439	-2.29296	-0.489407	-0.737031	1.45847	0.0592196	-2.85015	-1.07122	-1.65552
A_24_P174641	PDLIM5	chr4	q22.3	0.433602	-0.271217	0.431659	0.867547	0.84706	0.433602	0.218682	0.582983	0.802202	0.393908	0.46385	0.278607	-0.0495869	0.914992	0.340951	0.520383	-0.135501	-0.694668	0.127866	0.297388	0.198872	0.400071	0.471499	0.144609	0.932891	0.574951	0.733854	1.17786	0.342916	0.884034	0.386387	-2.94349	-3.04005	-0.992619	-0.707734	0.366451	-0.753001	-1.61088	0.509426	-1.90167	-0.508168	-1.52689	-0.318535	-2.5703	-0.219186	0.58853
A_23_P23292	RXRG	chr1	q23.3	0.421685	-0.682233	-0.476465	0.327217	-0.570815	0.941976	0.342931	0.321888	-0.508205	-0.776258	-0.729137	0.117436	0.421685	0.10535	1.42538	0.852235	1.66673	1.39438	0.525341	1.59335	2.97105	2.90768	0.355154	2.23859	0.193046	0.915431	1.42088	0.0853118	-1.02427	-1.0654	-1.04252	-0.673276	0.626404	-0.0586172	-0.314352	-1.21244	1.00707	-0.495913	-0.320662	-0.87517	-1.05817	-1.12452	-1.17912	-0.829044	-1.31324	-1.01732
A_23_P141555	TBX21	chr17	q21.32	0.413643	-0.773536	0.213559	-0.24269	0.130937	-0.858609	0.148544	0.485427	0.597765	-0.117824	0.575726	0.274463	1.72944	1.75009	0.224508	1.11508	1.48328	0.836085	0.581174	1.40933	0.176317	0.771556	-0.992987	1.02085	0.634013	-0.201624	0.396521	0.413643	-1.2991	-1.25752	-0.937414	-0.275689	-1.15678	-1.41932	1.22629	-0.542657	0.213015	-0.729073	-1.1742	-1.13397	-0.330144	2.44703	-1.30396	-1.29311	-0.970486	-0.422496
A_23_P18362	SLITRK3	chr3	q26.1	0.412001	-0.365377	0.634994	0.101241	0.283043	0.124493	0.11661	0.477782	-0.076974	0.207833	0.634994	-0.402013	0.342893	0.621446	0.293182	0.525435	0.457454	0.401351	0.793819	1.09398	0.412001	0.431211	1.29019	0.0282404	0.737474	0.447839	-0.614558	0.852368	-1.2064	-0.852942	-1.89513	-0.430255	-0.20508	0.215536	-1.89215	-1.9148	-0.67873	-1.85587	-1.78353	0.24491	-1.63008	-1.53208	-1.31674	-1.97261	0.0923507	0.283312
A_23_P79769	BIRC7	chr20	q13.33	0.40629	-0.452756	-0.501629	0.346245	-0.170441	1.51568	-0.488894	1.30704	-0.18246	-0.384982	1.11706	1.09198	-0.235504	1.70719	0.571427	-0.864718	4.00475	0.766502	0.338739	0.53441	1.28727	2.09586	-0.0337186	-0.442485	0.40629	1.7093	0.113257	-0.0983157	-0.63612	-0.520504	-0.314905	-0.703605	1.52807	-0.0501178	-0.741416	-1.10558	-0.398155	1.57638	-0.369997	-0.792243	-0.823456	-1.33718	2.42432	-0.621769	-0.383969	-0.425343
A_23_P168909	ZFPM2	chr8	q23.1	0.396621	-0.774532	0.363683	0.316859	0.626393	0.444321	0.231174	0.347379	0.231444	0.484922	0.537719	-0.259616	0.0683808	0.227958	-0.0558764	0.396621	0.58898	0.12322	-0.00246285	0.703367	0.531726	0.266602	0.467232	0.763688	0.415527	0.692766	2.27091	2.18683	-1.16713	-0.855442	-0.846146	-1.7179	-1.79634	-1.45881	-1.80873	-1.77815	-1.06244	-1.31855	-1.31493	-1.48725	-1.55789	1.95304	0.637757	-1.73758	-1.72707	0.159033
A_23_P317324	MECOM	chr3	q26.2	0.395088	-0.68671	0.412365	1.71955	0.395088	0.967459	1.18183	1.5882	1.04215	1.26418	1.15864	0.427577	1.40768	0.390558	-1.35115	-0.406057	-1.33994	-0.454399	-0.0829118	0.27255	0.140029	0.475793	0.79763	-1.09625	0.217166	-0.0963637	0.045631	0.714225	-0.570849	-0.436939	-0.651003	-0.544301	-0.295297	-0.199913	-1.15833	-1.25741	1.38776	1.02872	-0.218125	-1.06462	1.97099	-0.218034	-1.07911	-1.62278	-1.42718	0.509323
A_24_P326344	FAM135B	chr8	q24.23	0.392494	-0.512847	0.154073	0.0786291	1.39271	0.409739	1.70689	0.125808	0.21795	-0.125043	-0.145983	0.157519	0.379133	0.319864	1.11369	1.28168	0.307246	0.000477514	-0.196394	0.223458	0.57278	1.28266	0.88577	0.0511798	0.392494	0.581389	2.35693	0.99039	-0.339159	-0.989001	-0.990049	-0.265546	-1.32067	0.824164	-2.48361	-2.50956	-2.64561	-2.05766	0.0304839	1.06011	-0.853301	-1.38801	-0.73057	-0.652035	-1.93293	-2.07959
A_24_P161581	SHISA7	chr19	q13.42	0.388853	-0.921407	0.217774	0.431201	0.292035	0.491856	0.282708	1.69793	-0.28999	0.00552773	0.217774	-0.109123	0.837805	1.22746	0.0736311	0.363277	0.179882	0.570356	0.388853	0.797182	-0.14895	0.808798	0.735996	0.438416	0.923663	0.231468	-0.104757	0.574428	-0.605525	-1.53045	-1.2579	-1.00029	-1.25065	-1.23833	-1.03581	-1.43827	-1.68637	-1.28226	-1.29621	-0.455849	-1.06329	0.537108	-1.1075	-0.654861	-0.869596	-0.973217
A_23_P427278	RUNX1T1	chr8	q21.3	0.388196	-0.444738	0.461571	0.515496	-0.959987	0.226672	0.168153	0.14179	-0.138357	0.42679	0.183859	-0.365051	0.388196	1.03304	0.860342	0.319648	0.987771	-0.154223	0.497342	-0.123749	0.330052	0.397908	0.710549	0.660091	1.39372	1.81739	1.9566	0.256491	-0.460354	-0.477217	-1.83794	-2.51877	-2.2989	-1.81451	-2.28561	-0.831045	0.757834	0.152219	-1.19179	-0.251035	-1.30657	0.999876	-0.634351	-2.44514	0.532857	-0.191275
A_23_P24211	MMP21	chr10	q26.13	0.386066	-0.230103	-0.556782	-0.39462	1.72307	2.45634	2.03081	1.9535	0.386066	-0.988166	0.213758	-0.445881	-0.812247	1.12981	2.62142	2.05779	1.60288	1.22437	-0.819183	-0.666646	-0.600819	-0.433611	2.17803	-0.935198	-0.135146	1.29973	-0.53448	-0.892949	-0.231688	0.857744	-0.647562	-0.794014	0.482613	0.589257	0.389705	-0.590016	-0.48972	-0.531503	-0.556782	-0.300911	-1.13372	-1.41653	0.135157	-0.217878	0.998326	-0.299558
A_23_P501933	CACNG6	chr19	q13.42	0.384599	-0.781737	0.168308	-0.565741	1.06259	-0.716899	0.428026	-0.432854	0.0712128	-0.186086	-0.523782	0.177903	1.04127	0.277909	0.384599	0.566496	-0.228251	0.121928	0.108397	0.614361	2.44909	2.04363	1.1285	0.633627	1.98149	2.01531	0.87896	-0.381014	-0.105583	0.795311	0.492289	2.40539	-1.54729	-1.40337	-0.962709	-0.642645	1.19009	-1.26414	-1.50031	-0.738803	1.27897	-1.61947	-1.40769	-1.10834	1.09657	-0.934868
A_23_P94840	DYNLRB2	chr16	q23.2	0.384485	-0.847559	-0.240944	-0.0600166	0.508034	0.31532	-0.202842	0.468949	0.384485	-0.867834	-0.611911	1.21432	-0.522901	0.97628	0.248226	-0.220354	0.641074	-0.0571769	-0.43754	0.378546	1.69422	2.63271	2.11859	0.223265	1.75938	2.23173	1.01128	0.253059	-1.22496	-1.37345	-0.950783	0.305381	-1.65503	-0.963608	-1.37358	-1.31005	0.497382	-0.596338	1.43808	0.59468	-1.40313	0.920472	1.40232	0.473106	1.25624	-0.506387
A_23_P362148	DNER	chr2	q36.3	0.381248	-0.185147	0.456376	0.689803	0.754095	0.675718	0.258158	0.939326	0.236182	0.414695	0.335281	0.157409	0.192031	0.130984	0.770179	0.434998	0.0378431	0.254608	0.3664	0.283369	0.5765	0.701472	0.74918	0.431631	0.381248	0.29398	0.140804	0.576608	-1.03385	-3.09346	-2.31127	-0.200279	-1.06866	-0.383267	-1.80094	-1.13556	-0.940567	-2.10418	-0.776114	0.295269	-1.14295	0.685797	0.242854	-3.057	-0.0226548	-2.47514
A_23_P144348	SLIT2	chr4	p15.31	0.381188	-0.883053	0.757725	0.475369	0.381188	0.0838943	0.456653	0.63399	0.731306	0.94904	0.511076	0.900136	1.02477	0.925599	-0.473282	-0.713391	0.424142	-0.162677	0.372047	0.220589	-0.183764	0.297587	0.566578	-0.703831	0.651183	0.0257752	-0.380043	0.361655	-1.81732	-1.00909	-1.62912	-1.688	-1.39751	-0.850193	-1.96688	-1.82321	0.247104	0.225284	-1.19722	-0.915912	1.45092	1.9236	2.06182	-1.77025	0.774974	-1.27014
A_23_P55586	CDH20	chr18	q21.33	0.379121	-0.656194	0.581393	1.06096	0.350038	-0.0279639	0.487267	0.514067	-1.71298	0.0347443	-0.579443	-1.40107	-0.758601	0.61944	1.07612	0.745202	0.480631	-0.0991895	-0.0892598	-0.006234	1.76373	-0.00625702	0.674537	0.291496	0.619725	-0.898457	0.379121	0.826099	-1.64727	-1.91552	-1.93132	-1.10649	-1.938	-1.53975	-1.13614	-1.49666	-1.36715	-1.7725	0.0786316	-0.556835	0.6689	0.416203	-0.292842	-1.03926	-1.35973	1.42305
A_23_P38244	APOH	chr17	q24.2	0.368455	-0.477323	-0.392882	0.00579326	0.489743	0.942141	0.529372	1.53421	-0.138952	0.179039	-0.040152	1.21867	-0.352994	-0.118021	-0.48871	0.262405	0.378892	0.0868418	0.368455	0.0145733	6.56895	2.495	1.48853	0.677502	0.53412	1.26296	-0.0891977	-0.0204369	-0.28269	-0.527285	-0.336612	-0.312424	-0.673707	-0.407155	-0.14683	-0.600249	-0.323963	-0.685552	-0.554297	-0.336615	-0.611129	-0.190377	-0.521981	-0.448907	-0.440931	-0.667303
A_24_P261734	SLC38A1	chr12	q13.11	0.365771	-0.519143	0.13968	0.299485	0.34948	0.0976659	0.365771	0.0832714	0.189692	0.085696	0.878111	-0.288755	0.0643659	-0.121785	0.868485	1.2935	0.826022	0.876428	0.860186	0.827523	0.435585	0.139526	1.02583	-0.755936	0.546541	0.772415	0.109757	0.477829	-1.94651	-2.26045	-1.65518	-1.82679	-0.956216	-1.09083	-0.541088	0.370546	0.421762	-1.30288	0.6772	-0.161493	1.09278	-0.384913	0.244702	-1.42227	1.39453	-0.142201
A_23_P346900	CACNA2D2	chr3	p21.31	0.363115	-0.799933	0.62628	0.61944	0.803884	-0.214503	0.0681313	0.374324	-0.463365	0.380427	0.127212	-0.591319	0.779897	0.31022	0.514668	0.0846562	-0.0542015	0.211083	0.529084	0.148357	0.678029	0.367709	-0.404339	0.503514	0.207213	0.363115	1.13778	0.719752	-1.15376	-2.1781	-1.62895	-0.712741	-1.91081	-2.00607	-1.39115	-1.57878	-0.724352	0.917578	1.41555	-0.589116	0.686994	1.6802	1.62371	0.0189512	0.802221	-1.99036
A_23_P166207	ABCC13	chr21	q11.2	0.359051	-0.276264	-0.647797	-0.928813	0.585439	1.12565	-0.684555	1.34557	0.911227	-0.74079	-0.921737	0.972986	2.95881	0.359051	2.2383	0.335564	2.6543	2.95516	2.17862	0.389084	0.138493	0.204402	0.0913582	-0.685181	-0.566931	-0.262098	-0.571888	-0.680352	1.03515	-0.00878838	-0.573049	1.95077	-0.530903	0.191043	-0.812325	-0.25315	-0.647797	-0.635834	-0.862265	-1.14955	-0.202914	-1.09507	0.0102459	-0.590455	-0.690395	-0.190546
A_23_P147255	PCBP3	chr21	q22.3	0.358694	-0.30352	-0.37518	0.217729	0.304901	1.87123	1.18218	1.61633	0.712748	2.1565	0.900191	2.47062	1.52863	0.694747	-0.314775	-0.0647117	0.176085	0.23387	-0.0475882	0.358694	0.929982	1.32453	1.13875	0.283162	0.267086	0.0919273	-0.76604	-0.804713	-0.775562	-0.862542	-1.37373	0.0476731	-1.10281	-0.420734	-1.3027	-0.602185	-0.758805	-1.13768	-1.46281	0.234556	0.801828	0.396937	1.47915	-0.372994	-0.7172	-1.55073
A_23_P74668	C1orf158	chr1	p36.21	0.357102	-0.387877	-0.382056	-0.409178	-0.432872	0.759061	2.26879	1.75379	-0.757267	-1.12557	-0.852827	1.58711	-0.197546	0.744148	0.357102	0.0585818	0.582621	-0.481654	0.335128	0.765334	3.22824	3.86094	0.234722	-0.514248	0.972803	1.06297	-0.380168	-0.0269204	-0.518335	-0.765523	-1.13622	0.594673	-1.22391	-0.793363	-1.19813	-0.295562	-0.949224	-0.95729	0.236274	-0.110207	-0.524799	-0.373286	-0.558336	0.0801777	0.159626	0.291838
A_24_P923854	C3	chr19	p13.3	0.322293	-0.751217	-0.105919	-0.0641964	0.154125	0.726508	0.882541	1.24099	-0.318749	1.14947	0.543712	2.40262	2.48093	1.12498	-0.186044	-0.0815892	2.07682	0.30904	0.780412	0.322293	-0.609426	1.79977	-0.0860234	0.570014	-0.0110098	0.18353	0.057203	1.22547	-0.91071	0.555361	0.0985264	-0.113317	-1.06301	-0.414361	-1.33368	-0.899467	-0.932364	-0.846069	-1.19808	-0.0094286	-0.939772	-1.25136	-0.966239	-0.231914	-0.992656	-0.211426
A_23_P407583	PEG3	chr19	q13.43	0.306811	-0.70535	0.488998	0.534858	0.730634	0.543262	0.306811	0.335555	0.0405144	0.265545	0.387287	-0.0661884	0.256414	1.03159	0.122858	0.298129	0.15976	-0.101166	0.391152	1.03391	-0.800736	0.560646	0.386706	-1.49901	0.571357	0.0380669	0.796014	0.231141	-0.319475	0.347688	0.72822	-2.11308	-0.928516	-0.960313	-0.902473	-2.20759	-0.480921	-1.4232	0.862269	-1.35068	-0.654914	-0.0301921	-2.31136	1.26634	-1.36529	-0.724355
A_32_P78101	IGSF21	chr1	p36.13	0.30127	-0.753005	0.600981	0.0445741	0.584432	0.318045	0.48885	0.200052	-0.0861651	0.30127	0.544092	0.0931671	0.387692	0.324616	-0.340926	0.351506	0.720832	0.65268	0.080205	0.617053	0.320774	0.0994203	1.06194	0.600981	0.159829	-0.313114	-0.298395	0.296544	-1.08663	-1.88927	-2.01873	-0.695719	-0.803778	-0.506726	-2.82637	-1.5887	-1.58276	-0.758247	-1.29208	0.50979	0.44628	1.28195	-2.151	-1.71004	-2.30775	-0.840225
A_24_P13001	SORCS3	chr10	q25.1	0.257958	-0.533	0.628582	-0.178632	0.805494	0.520464	0.0688394	0.300458	0.0485542	1.01464	0.628582	0.612456	-0.501569	-0.371957	0.257958	-0.258367	0.314756	0.150967	0.457422	0.36124	0.726454	-0.291573	0.109295	-0.54137	0.66868	0.378328	0.240155	-0.0863573	-0.688	-1.0852	0.244865	-0.711768	-0.512224	1.14921	0.076343	-1.33871	1.83238	-1.55273	-1.48545	-0.553776	1.11105	1.19944	-3.24251	-3.6305	0.541782	-2.12529
A_23_P120281	EDAR	chr2	q12.3	0.249456	-0.52844	-0.558536	0.373828	4.27986	2.47342	0.123755	2.50541	0.208403	0.202115	0.515806	-0.127399	0.569531	-0.338543	0.249456	0.40236	0.453599	-0.431471	0.518806	-0.317035	-0.609121	1.26628	3.7448	1.68597	-0.382619	-0.232834	-0.297999	1.76181	-0.321724	-0.669319	-0.574262	0.213137	-0.387904	0.103565	0.0976366	-0.66403	-0.675105	-0.55659	-0.208643	-0.201525	-0.0437453	-0.00315617	-0.070429	-0.783794	-0.707213	-0.595678
A_23_P72096	IL1A	chr2	q13	0.24266	-0.55173	-0.337737	-0.519153	0.375732	1.35749	-0.0360587	1.25354	0.826065	-0.10344	0.8338	2.95478	0.24266	0.0250308	-0.339572	-0.484144	0.106016	0.985411	1.16909	0.190545	2.30279	3.00455	1.29353	3.17008	-0.576808	0.0194651	-0.432024	0.832724	-0.228424	-0.73213	-0.717543	-0.257459	-0.0829644	-0.329933	-0.96606	0.070675	-0.915774	-0.970588	-0.839731	-0.188215	-0.71062	-0.857418	-1.22679	-1.09699	-1.05369	-0.594511
A_32_P485915	SLC9A11	chr1	q25.1	0.23699	-0.47311	-0.263229	0.784252	0.107373	1.64428	0.768806	-0.0271911	-0.525594	-0.678546	-0.660461	-0.391712	0.14531	-0.3901	1.1861	-0.192407	0.23699	0.0361616	-0.103714	1.5976	2.46547	1.45937	0.416288	0.237347	1.80915	3.85667	4.25187	-0.293835	0.329358	-0.411965	-0.417423	-0.633573	-0.0403244	-0.6957	-0.165063	-0.774533	-0.689558	-0.827118	-0.081778	-1.00447	-1.14053	-0.799766	-0.109488	-0.801534	-0.708935	0.0771258
A_23_P155755	CXCL6	chr4	q13.3	0.236556	-0.603044	-0.398834	-0.391615	-0.245635	0.125974	2.07756	0.649341	2.10275	1.85015	0.591187	3.38635	2.61199	0.306303	0.736179	0.495336	-0.626738	0.0483015	0.139148	-0.102436	0.236556	0.0153215	2.44358	-0.384365	-0.18046	-0.318644	0.280945	-0.571127	-0.704297	-0.610923	-0.668666	-0.705114	-0.602839	-0.721899	-0.814431	0.526699	-0.552317	-0.0363621	0.878164	-0.714822	1.30283	-0.265517	-0.309189	-0.543803	-0.570873	-0.365211
A_24_P163845	CWF19L1	chr10	q24.31	0.195193	0.533817	-0.646428	-0.67496	-0.458751	0.860949	0.675156	0.523391	-0.873181	0.224248	-0.364969	0.704486	0.547868	0.787944	0.195193	1.64737	1.35548	-0.269238	0.186417	0.0680102	0.100963	-0.848769	-0.411534	0.142483	-0.672963	0.364235	0.734076	-0.908642	0.847257	0.663187	0.566608	1.91105	-0.679078	0.862389	0.501026	-0.425694	1.64991	-0.286231	-0.781243	1.61527	-0.826971	-0.0627869	0.67989	2.18796	1.23823	0.354723
A_32_P8971	PTPRD	chr9	p24.1	0.161732	-0.603816	0.57064	0.161732	1.1501	0.133419	0.0667325	0.219635	-0.443686	0.275191	0.275239	-0.415598	-0.156005	0.120365	0.0184836	0.338747	1.49837	1.25744	0.347776	1.03897	0.098534	0.176228	0.405381	0.0843274	-0.368865	-0.589883	0.0990658	1.1769	-2.00404	-0.745044	-0.798531	-0.474917	-0.685576	-0.566399	-1.58625	-1.74653	-1.09475	-1.10658	-1.86498	-0.641234	-1.4543	1.16323	-0.793117	-0.258656	0.00960492	-2.37793
A_23_P349321	XYLT1	chr16	p12.3	0.152397	-0.758236	0.532531	-0.58721	-0.0804068	-0.0933117	-0.149286	0.0528619	0.677364	-0.0636867	0.568849	-0.690121	0.693368	-0.0887773	-0.144969	0.0170732	0.606625	0.931548	0.0346624	1.28289	0.221736	0.152397	0.538498	0.193147	0.989074	0.256554	0.455861	0.884147	-0.833696	-1.80693	-1.74217	-0.467244	-1.39424	-1.13987	-1.43822	-1.56534	0.465101	-1.54032	-1.75639	-0.931001	0.0581106	0.398215	-2.881	-0.117177	-0.0986567	-1.37559
A_23_P8640	GPER	chr7	p22.3	0.135814	-0.560571	0.511604	1.03362	2.00378	0.610803	1.07052	0.903406	0.798961	-0.188109	1.70314	1.00602	1.10371	-0.11733	-0.969244	0.0200126	-0.00871176	0.936712	1.3634	-0.841739	0.135814	-0.221898	-1.23709	0.14463	-0.540718	-0.382327	0.493101	-0.430156	-0.0734981	0.57049	-0.660069	-0.0619501	0.00325927	0.498101	-0.888657	-0.526233	0.420966	-2.06521	-1.12033	-1.10425	-1.31397	0.331731	-2.46866	-1.65236	-1.47719	0.232653
A_24_P680704	SATB1	chr3	p24.3	0.116618	-0.457658	0.644153	0.128671	0.546057	-0.26867	-0.172348	-0.19183	-0.179289	0.769809	-0.00632905	-0.72806	-0.0792305	-0.0420853	-0.0398081	0.26044	0.116618	-0.177562	-0.204026	0.375953	-0.488865	0.12346	0.976344	0.644153	0.826733	0.721883	1.09753	0.789169	-0.508456	-0.766595	-0.406861	-0.308727	-1.23508	0.186043	-0.839928	-2.38105	1.15668	-0.268836	-0.486372	-0.736628	1.91484	0.631621	-3.18413	-2.69442	-2.18916	-0.82139
A_24_P59111	DPP6	chr7	q36.2	0.0917131	-0.48075	0.211023	-0.0261572	0.36784	0.0917131	-0.251926	-0.0553289	1.49526	0.0455102	-0.0818479	-0.782783	0.117472	0.125374	1.42943	0.147001	0.289144	-0.0278952	-0.20534	-0.10088	0.371565	-0.230703	1.54896	0.137388	1.61436	1.62628	-0.317532	0.0144845	-0.717844	-1.45199	-0.632147	-0.829108	-0.682937	-1.3823	-2.57977	-1.90402	-2.20748	-2.67479	-1.29287	0.324336	2.07252	1.987	-1.1994	1.54071	-0.185424	0.0757125
A_24_P938101	MYOM1	chr18	p11.31	0.0517658	-0.8827	0.416288	1.21068	1.24976	0.33287	-0.315403	0.331538	-0.824754	-0.254956	-0.856274	-0.501943	-0.0317251	0.0517658	0.0916568	-0.336655	1.67087	-0.11581	-0.0404767	-0.17847	2.26771	-0.104812	-0.536674	0.416288	0.212141	0.791059	1.09358	0.903343	-1.347	-0.0163549	-0.794442	-1.05378	-2.03411	-1.17138	-1.6331	-1.5789	-0.12597	-1.06124	-1.66663	-1.07641	-0.637219	-0.269137	-0.645596	-1.44545	-1.48032	-0.366681
A_32_P17145	RORA	chr15	q22.2	0.0165395	-0.660642	0.158107	0.14407	0.40695	0.61748	0.0165395	-0.210804	1.68713	0.475562	0.293277	-1.3487	-0.215719	-0.920479	-0.410667	-0.207907	-0.118618	0.278012	-0.391652	0.102816	0.16515	-0.666715	0.301898	0.0422693	0.350535	0.0738846	-0.0572089	-0.48103	-0.59939	-0.759549	-0.156735	-1.1862	-1.58963	-0.84698	-0.949781	-0.0171808	-0.413433	-1.73278	-1.24625	-0.911174	2.82306	2.17995	-1.50216	-1.28679	-0.425247	-0.0258773
A_23_P355517	SYNPO2L	chr10	q22.2	-0.0058372	-0.338754	-0.311555	-0.0058372	-0.448089	0.766117	-0.533779	0.105891	-0.651115	-0.366876	-0.308856	-0.513117	-0.873789	-0.557983	2.14935	-0.0428896	4.03018	-0.309052	1.61373	0.749899	3.12785	-0.277955	-0.284903	0.00558927	2.18014	1.10942	4.07174	0.0243369	-0.773498	-0.22982	0.131949	-0.805036	-0.162626	-0.442696	-0.121465	-0.645713	-0.311555	-0.634059	-0.71359	-0.85878	-0.581838	-0.777337	-0.21888	-0.761215	-0.323083	-0.531209
A_24_P383649	AMZ1	chr7	p22.3	-0.0135872	-0.863908	0.788197	-0.0819394	-0.195635	-0.00287202	-0.19111	0.409041	-0.129346	0.181264	0.675066	-0.0129932	0.928821	-0.124322	-0.0752776	0.268565	-1.59276	-0.0598342	-0.141657	-0.0135872	-0.280436	-0.372483	1.10766	0.644023	0.950207	0.986394	0.935041	0.293932	-1.0927	-1.44351	-1.25875	-1.31517	-1.2844	-1.2907	-0.801617	-1.39985	-1.5795	-1.34062	-1.36338	-0.714266	-1.36731	0.998938	-1.20147	-1.0174	0.33558	-0.715619
A_23_P106204	GSTZ1	chr14	q24.3	-0.0295453	0.715947	-0.324791	0.0886179	-1.23272	0.369311	-0.490757	0.72351	-1.39377	-0.885552	-2.07514	-0.709891	1.38588	-1.39261	0.911345	0.480726	-0.527194	0.0193661	-0.0295453	-0.00611952	-0.648176	0.407428	0.0297907	1.03123	-2.01856	-1.28218	-0.548018	0.0495239	0.483819	1.35321	1.06661	2.74227	0.309467	-1.45724	1.09925	1.88818	-0.780602	0.261792	-1.57572	1.4528	-0.561136	-0.166666	-0.273395	0.948075	-0.328155	1.29307
A_23_P206424	CHD9	chr16	q12.2	-0.0709776	0.362459	0.233864	0.11005	0.0876843	0.302723	-2.59887	-1.44817	0.044289	-1.6009	0.160324	-1.98348	-0.167983	-1.37019	-1.89886	-0.0709776	-1.69051	0.0432084	0.554117	0.84438	-2.05823	-1.36727	-2.62598	0.233864	0.14575	0.312546	0.363474	-0.0289622	0.31497	1.05297	0.92832	-0.871711	0.969994	0.356069	1.44952	0.970437	0.833643	1.37043	1.02212	0.219136	1.27885	0.77977	0.243034	1.45124	0.583768	-0.225606
A_23_P144622	GNPDA1	chr5	q31.3	-0.0906548	0.733142	-0.508606	-0.692331	-0.0672683	0.531319	0.465604	0.0870732	-1.70775	0.131676	-0.508606	0.526049	-0.615478	-0.40324	0.0777088	-0.286472	-0.00692159	-0.340496	0.540353	0.207041	0.383344	-0.0906548	-0.602448	0.667768	-1.01241	-1.19215	-0.400711	-1.67198	1.66519	1.80031	0.561119	0.673968	0.854586	1.50896	0.659869	-0.314612	0.308007	1.58417	-0.543812	1.4438	-0.136953	-1.08317	0.664689	2.94933	-1.03059	1.68464
A_23_P49041	TMEM62	chr15	q15.2	-0.217274	0.705304	-0.550041	-1.0867	-1.44185	0.272028	0.0151553	-0.498191	-0.103984	-0.522075	-1.41143	-0.424321	-0.175713	-1.42819	0.261635	1.20048	0.322259	0.883385	-0.221557	0.565789	0.198151	-1.13027	-0.217274	-0.30116	-0.601081	-0.215648	-0.37678	-0.709917	1.00722	1.07563	0.27347	-0.439455	0.758954	1.03803	-0.647186	-1.44485	1.31477	1.32883	-0.894131	-0.0291087	-3.2213	-1.73291	2.85638	2.63643	-0.769492	-0.390771
A_24_P124662	MAPKAPK5	chr12	q24.12	-0.219413	0.661922	-0.592118	-0.846107	-0.914691	-0.909911	-0.827565	-0.73131	0.385943	-1.92706	-0.111791	-0.6094	-0.524775	-0.162189	-0.566884	1.02396	0.647507	-0.00406456	-0.157509	-0.0658372	-1.68591	-0.219413	0.143161	0.831141	-0.0315221	-0.0601386	-0.265213	0.0628519	-0.0356892	1.49031	0.677215	0.646629	0.254561	0.686103	1.67099	1.86937	-0.0290485	1.20211	0.615354	0.380077	0.930107	-0.007119	0.727231	0.884045	2.5174	-0.202204
A_23_P101516	KCNC3	chr19	q13.33	-0.236031	-0.376385	0.677884	-0.0880932	-0.236031	-1.29778	-1.27907	0.141866	-0.472341	0.470734	-0.210346	-0.779169	0.264409	-0.143197	-0.681265	-1.71023	-0.707842	-0.866045	-1.18472	-0.768223	0.242775	-0.667387	-0.197262	1.01146	0.268957	-0.00151945	0.075984	0.679729	-1.1008	-1.26846	-1.50632	-0.319474	-0.473176	-0.877531	-1.19344	-0.812571	-0.254196	-1.40369	-1.01801	0.0850607	1.17007	0.186103	-0.426881	-0.877072	0.495896	-0.32589
A_23_P327910	ZIC3	chrX	q26.3	-0.238948	-0.554449	0.672317	-0.326406	0.425991	-0.22923	-0.10457	-0.654747	-0.750133	-0.84645	-0.0111218	0.226841	-0.0206162	-0.690366	-0.238948	0.553701	0.124146	0.175666	-0.486049	-0.692502	-0.0341643	-0.322367	-0.346143	0.672317	-0.424609	-0.153421	0.509158	-0.272915	-0.171372	-0.842396	-0.690902	0.906867	-0.367512	0.292356	-1.01471	-1.21995	-0.242641	-1.37287	-1.51418	-0.60878	-1.03238	2.39108	-0.41124	-1.57643	-0.427144	1.90977
A_23_P26759	CANT1	chr17	q25.3	-0.254251	0.570227	-0.262046	-0.906893	-0.239386	-0.593276	0.345442	0.174892	-0.0641373	0.208407	-0.0703945	0.714678	-0.0809585	-0.475824	-0.2371	-0.254251	-0.858679	-0.801402	-0.0721759	0.0353559	-0.25934	0.460576	-0.427768	-0.113956	-1.58116	-0.591658	-1.49674	-2.18887	2.19701	0.901309	0.758763	0.818876	0.709868	1.30736	2.90514	-0.478131	1.00492	1.6597	-0.586259	-1.4631	-0.557565	-1.64575	-0.476177	2.56342	0.0466728	0.593995
A_23_P413815	VKORC1L1	chr7	q11.21	-0.296154	0.427272	-0.374261	-0.127957	0.586865	-1.79119	-0.531326	-0.135866	0.225101	-0.543118	0.0236781	0.385827	-0.327398	-2.5357	-1.42926	-0.290032	-1.00244	-0.174389	-0.296154	-0.131716	-1.69049	0.621345	0.192134	0.0280744	-0.868182	-0.231069	-0.767807	-0.951417	-0.0521339	0.655483	-0.0662223	0.342075	0.0849634	-0.743284	1.68558	1.19441	0.513521	2.84268	1.54874	2.40376	0.53676	-1.68663	0.00967196	0.428174	0.946051	-1.47351
A_23_P216779	NTRK2	chr9	q21.33	-0.318928	-0.634422	-0.0608339	1.66226	1.54746	1.09621	-0.344118	-0.435112	-0.318928	-0.452538	-0.40552	-0.707677	-0.5871	1.44461	1.15376	-0.609512	-0.696366	-0.602857	-0.371245	-0.431572	-0.467284	1.68168	1.14254	1.26608	1.4334	1.60909	1.86453	1.48811	-1.44475	-1.65608	-1.01067	-1.13109	-1.43876	-0.697844	-2.22677	-0.738922	-0.992459	-1.53023	-0.39892	-0.555039	-0.923547	1.89134	-0.641024	-0.303811	-0.380754	-0.618815
A_23_P23759	CFHR5	chr1	q31.3	-0.343481	-0.32183	-0.224532	-0.518799	-0.589707	-0.318058	-0.349615	-0.4996	-0.0511977	-0.326991	-0.224532	-0.307807	-0.34226	-0.324999	-0.177692	-0.488264	-0.30913	-0.501012	-0.299525	1.02621	-0.318649	-0.489353	-0.355261	-0.0688077	-0.343481	-0.530572	-0.495209	-0.511879	-0.317764	-0.515082	-0.563286	-0.288534	-0.59199	-0.209475	-0.507779	-0.316127	-0.590514	-0.414108	-0.572485	-0.297243	-0.363511	-0.25455	-0.42764	-0.524227	-0.220903	-0.279055
A_23_P372994	H1FOO	chr3	q22.1	-0.347189	0.465415	0.0414214	-0.270512	0.356984	-2.63381	-0.347189	0.245467	0.106509	-0.168241	-0.599451	-0.938356	-0.710779	-1.20903	-2.64979	-1.43397	-2.32066	-0.965296	-2.3173	0.870894	-0.183542	-1.18528	-1.83704	0.455073	-0.145522	0.757412	-0.126722	0.388353	1.7093	1.05402	0.466288	-0.0687699	1.08314	1.30764	-0.389883	1.59328	1.25719	0.609464	2.06355	-0.119786	-0.846902	-0.694084	0.332206	0.838911	0.0549485	0.658757
A_23_P19192	LYPLA1	chr8	q11.23	-0.359785	0.569533	-0.362977	-0.320206	-0.359785	-0.687426	-0.243911	-0.897597	0.0705265	-0.504991	0.360908	-0.224388	-1.29344	-1.73744	-0.273654	-0.566349	-0.879542	-0.585561	0.353299	0.332457	-1.07945	-0.78387	-0.110328	0.468535	0.175762	-0.304434	-0.288017	-0.776313	0.549658	0.678741	0.403619	-0.466225	0.300816	1.08345	0.175571	1.67727	-0.185208	4.13188	-0.848566	1.12618	1.75353	-0.496341	0.802444	1.04856	1.23529	-0.340792
A_24_P417281	TMX3	chr18	q22.1	-0.368566	0.773782	0.0489437	-1.38804	-0.519434	-0.338898	-0.313438	-0.117321	-0.255387	-0.213345	0.422896	-0.507969	-0.430873	-1.87659	-0.070737	-0.0427508	-2.23134	0.102654	0.650695	-0.976929	-0.244765	0.283799	-0.488455	-0.0204551	-1.42473	-1.68396	-0.368566	-1.70088	1.34579	1.89038	1.30352	-0.656203	0.727832	0.744021	1.02926	-0.220895	-0.242237	-0.114845	0.916524	-1.99254	0.459953	0.563691	1.1784	1.0686	1.30653	1.11279
A_32_P430359	DDX54	chr12	q24.13	-0.383331	0.56312	-0.708587	-0.685503	-0.996317	-0.868599	-0.880957	-0.612443	-0.383331	-1.43171	-1.00639	-2.15059	-0.0165995	-1.38365	-0.472351	-0.332876	1.55716	-0.346679	-0.254924	-0.658455	-0.241677	-0.380632	-1.04198	-1.2048	-0.00982589	0.365124	0.453031	-0.0855688	0.808469	0.24734	0.264743	1.47204	1.34443	0.955488	1.4181	2.9971	0.0608288	0.134391	1.08671	-0.404765	1.09016	-0.775246	0.117103	0.955714	1.79781	0.586753
A_23_P39154	ZNF345	chr19	q13.12	-0.399969	0.32166	0.186511	0.054166	-0.0396938	-0.894516	-1.07061	-1.89675	-0.0420828	0.354929	0.151506	-0.267062	-1.82839	0.166263	-0.366562	-1.33821	-1.92577	-1.58998	-1.03142	-1.36025	-1.93891	-1.46033	-0.399969	-0.68964	0.117259	-0.390528	0.922242	0.605971	-0.157269	0.326164	1.06839	-0.118766	1.45459	1.67122	1.79631	1.13932	1.69991	0.225715	1.58249	-0.294605	0.186511	-0.565871	1.40712	0.960724	1.59481	-0.132815
A_23_P423480	TYSND1	chr10	q22.1	-0.40907	0.619119	-0.0615823	0.536611	-1.25413	-0.470414	0.413486	0.519575	-1.96988	0.00122656	-1.31086	0.377219	0.336071	-1.48947	-0.40907	-1.29668	-0.890395	-0.100728	-0.0875562	-0.735916	-0.36589	-1.7025	-1.12492	-0.745771	-1.05666	-0.380086	0.0821554	-1.55398	0.538853	-0.11205	0.707038	1.49618	0.0298508	1.79774	1.5836	0.325925	-0.658588	-0.0566077	-0.839809	1.01209	-1.28333	0.943772	2.15202	2.74836	0.948247	0.655251
A_24_P372672	DLAT	chr11	q23.1	-0.409755	0.732797	-0.451328	-0.718341	-0.507094	-0.0883145	-0.354651	0.0386855	0.930262	-1.38779	-0.64866	-0.211126	-0.756715	-1.69607	-1.02768	-0.282256	-1.08199	-1.11095	-0.539465	-0.515092	-1.62462	-0.0342472	-0.409755	-0.046908	-0.272632	-0.290802	-0.332039	-0.390261	0.0381948	0.269282	-0.536384	0.939297	-0.987185	-0.147897	1.41616	1.00223	-1.84461	0.739569	-1.3116	0.0526696	2.21073	-1.03528	0.828001	-0.792904	0.783988	1.25999
A_24_P336510	CFHR1	chr1	q31.3	-0.412856	-0.390018	-0.100753	-0.542202	-0.312868	-0.503769	-0.649156	-0.292679	-0.537401	-0.58357	-0.452572	-0.211292	-0.219984	-0.159495	-0.4551	0.0818366	-0.534096	-0.412856	-0.29404	0.93991	-0.505609	-0.561399	-0.0342594	-0.293357	-0.523039	-0.0441996	-0.495066	-0.207099	-0.334686	-0.587592	-0.352343	-0.497109	-0.498088	-0.472799	-0.297889	-0.27229	0.226214	-0.400493	4.83453	-0.396114	-0.292938	-0.626961	-0.359811	-0.711667	-0.401841	-0.383922
A_23_P348894	SEC23A	chr14	q21.1	-0.4238	0.594752	-0.147521	-0.486432	-0.407683	0.121053	0.479119	-0.267322	-0.4238	0.341562	0.953332	-0.219771	-0.380586	-1.16187	-0.843026	-0.348602	-0.86088	-0.582247	0.0846942	0.320265	-0.102262	-1.29827	-0.719994	-0.595977	-1.45753	-2.49505	-1.82234	-1.47624	1.28794	1.3542	0.618046	-1.05023	0.571458	1.05526	1.91647	0.128001	1.6938	1.42749	-1.51508	0.0309528	2.82667	-0.0269783	1.66179	-0.0560406	1.27469	0.294936
A_23_P306223	ARX	chrX	p21.3	-0.425214	0.878721	-0.769057	-0.955512	-0.913573	-0.612301	-0.182957	-0.425214	-1.09257	-1.06371	-1.16339	-0.362469	-0.222371	-0.290896	0.221497	-0.221315	-0.141317	-0.432552	-0.158139	-0.292534	-0.645557	-0.332495	-0.203524	-0.922601	-0.923386	-0.864625	-0.855002	-0.597155	2.38599	1.60332	1.4293	1.49323	1.67055	1.6122	0.455552	-0.0120731	0.0824255	0.227293	-0.126713	-0.215742	-1.08272	-0.945138	-0.71427	-0.824188	-0.842683	0.906337
A_23_P210091	SUPT7L	chr2	p23.3	-0.432519	0.38897	-0.286209	-0.119876	-0.0637275	-0.76707	-1.55694	-0.0941538	-0.304314	0.234825	-0.397144	-0.300814	-1.71135	-0.658839	-1.51036	-0.402454	-1.10538	-0.790428	-0.977461	-1.61344	-0.100997	-0.465655	-0.0744803	0.490881	-0.432519	-0.526536	0.0810424	-0.0270423	-0.838263	0.368443	-0.184064	1.25778	0.0719552	-0.693299	0.292454	1.90793	-0.407187	0.382874	-0.355437	0.062823	0.487376	0.451912	1.51635	-0.374281	0.429475	2.02604
A_23_P26107	RFX7	chr15	q21.3	-0.445786	0.412363	-0.0222147	-1.00375	0.353262	-0.761262	-0.706272	-0.16236	-1.44073	-0.445786	-0.595067	-2.78811	-1.56791	-1.88694	-0.166431	0.42578	-1.21156	-0.457696	-0.0186761	-0.397185	-0.393155	-1.5334	-0.0155651	-0.437607	-0.88348	0.131163	0.471303	-0.350463	-0.347589	1.27763	0.3991	-0.272031	1.27516	0.780068	2.05594	-0.550536	2.62056	0.425625	-0.141143	-1.47202	2.33234	0.968439	1.47867	0.896407	2.0855	-0.0772089
A_23_P143006	PRLH	chr2	q37.3	-0.457007	0.417314	-0.184927	-0.226264	-0.318337	-0.314826	-0.281561	-0.598242	1.07527	0.079847	-0.00599696	-0.916389	-0.344638	-1.54441	-0.396811	-1.10476	-0.397042	-2.47963	-0.662139	-2.21312	-0.457007	-1.07137	-1.07531	-1.5245	0.821068	-1.14262	-0.660811	0.513856	0.79508	-0.377003	-0.27543	1.27408	-0.958779	-0.113961	0.434229	0.755461	-1.36297	0.200363	1.34246	0.508959	-0.526161	0.68551	0.400399	0.388393	1.33899	1.23838
A_32_P42925	MYL12B	chr18	p11.31	-0.460147	0.371933	0.248527	-0.258179	-0.970208	-1.3152	-0.226299	-0.00913917	-0.460147	-0.418035	0.436844	-0.277027	0.199452	0.0115354	-0.506156	-2.46653	-0.941887	0.241994	-0.17273	0.967661	-0.197201	-1.73949	-2.86384	0.313089	-0.924505	-1.08424	-0.870241	-1.2636	0.387965	1.07555	1.47589	-0.290439	1.53311	0.320571	-0.307844	-1.35279	0.669812	1.64375	-0.115161	-0.464312	-0.476278	-0.736764	0.356403	-0.0578948	0.387463	1.2594
A_24_P222365	LARP4	chr12	q13.12	-0.460618	0.373522	-0.396513	-0.207049	-0.641405	-0.595271	-0.660043	-0.943847	1.19208	-0.0795184	-0.431092	0.334693	-0.706434	-1.24692	-0.72176	0.671929	-1.18325	0.0869488	0.137462	0.0503038	-0.161996	-0.460618	0.168102	0.259925	-0.655631	-0.740814	-0.206717	-0.887184	0.377401	-0.518188	-0.0246709	-0.587949	1.40194	1.46473	3.01599	0.167152	0.0414165	0.8573	1.05724	-1.02894	0.652954	-0.00698388	2.03007	2.45458	2.33762	0.211552
A_23_P26173	TMED3	chr15	q25.1	-0.471119	0.542786	-0.0725962	-0.835332	-1.51715	-1.07332	-0.981037	-0.242439	0.750857	-0.0967132	-1.1432	-0.836795	0.242114	-0.110684	0.282453	-1.4204	-2.33449	-0.471119	-0.443772	-0.412122	-0.436166	-1.86869	-1.35169	-0.349298	-0.126055	-0.0225243	-0.634646	-0.604514	0.553521	0.102041	-0.294224	0.589479	0.72654	0.240115	0.422898	0.532052	-0.0725962	2.05988	0.53918	-0.716746	0.30032	0.387233	0.0534	1.82316	0.632094	-0.466485
A_24_P307974	TAF8	chr6	p21.1	-0.472607	-0.0116783	0.307463	-0.353286	-0.286906	-0.098745	-0.680153	-0.177629	-0.0720281	-0.505461	0.307463	-0.396623	0.248066	-0.404784	-0.622724	-2.34307	-2.65226	-1.50934	0.601784	0.890195	-1.21079	-1.53971	-2.21153	0.609663	-1.34068	-1.18244	0.853636	-0.472607	-0.283055	2.40051	1.06255	-0.0937404	-0.0124966	-0.069224	1.94874	0.826589	1.53439	0.267887	0.497251	-2.13077	-0.764407	-0.0697686	0.337966	0.669701	-0.501783	1.02698
A_24_P924251	ARSE	chrX	p22.33	-0.472981	0.11149	-0.449797	-0.115878	0.0078194	-0.571546	-0.469864	-0.378729	0.00381742	-0.861787	-0.116173	-0.561524	-0.636776	-0.669136	-0.234316	-0.726817	-0.833817	-0.291562	-0.296557	-0.307875	-0.307201	-0.878251	-0.535912	-0.761342	-0.239109	-0.472981	-0.628833	-0.719706	0.467433	1.13171	0.71841	3.66278	2.36147	-0.65873	1.3065	0.117797	-0.95206	2.73288	-0.733582	-0.104536	-0.678191	2.06133	-0.863052	2.64449	0.0466109	0.744915
A_23_P369666	ZMYND8	chr20	q13.12	-0.476072	0.279281	-0.0636198	0.366352	-0.561519	0.328509	-1.15121	-1.19292	0.257263	-0.476072	-0.684365	-1.87174	-0.377081	0.196173	-0.00649376	-1.46556	-0.787185	0.206191	-1.46501	-0.041387	-1.09219	-1.2436	-1.61511	-1.37653	-0.506112	-0.0652091	0.927933	0.600176	1.01139	1.33007	1.9437	-1.22502	1.21868	0.0805017	1.24596	1.63544	0.0247081	0.279917	0.812779	0.249593	-0.638662	1.14103	1.75751	2.3221	0.0281315	0.316942
A_23_P108564	B3GALT1	chr2	q24.3	-0.480047	0.241377	-0.263611	-0.665704	-0.0869712	-0.966604	-0.390151	-0.182295	-1.09379	0.0303469	-0.0657728	-0.562921	-0.480047	-0.813645	-0.313803	-0.765581	-1.01193	-0.668517	-0.0931371	-0.414587	0.143678	-0.374146	-0.0627167	-0.343157	-0.664222	-0.554392	-1.03094	-0.378876	3.20568	1.73195	3.17952	-1.14645	0.191459	-0.978048	3.2152	0.307571	-1.14218	0.339599	-1.04309	0.12625	0.231615	1.97569	1.12369	-0.505469	-1.17791	1.29718
A_23_P164451	TBX2	chr17	q23.2	-0.484053	0.478163	0.137645	0.432341	-0.329329	-0.791196	0.258009	-0.484053	-0.230569	-0.0763235	0.288212	-0.0196475	-0.0577144	-0.432706	-1.36717	-1.30973	-0.758941	-0.394086	0.357512	-0.647544	-1.7135	-1.90644	-2.09722	-1.46793	-1.19102	-1.05735	-0.913514	-0.300245	2.5699	2.41816	2.43163	0.513947	0.343021	0.430978	1.39708	0.982804	0.363612	1.86458	-0.704405	-1.53861	-0.217737	0.917819	-0.833884	-0.716078	0.0982011	0.351182
A_23_P1117	ST7L	chr1	p13.2	-0.486966	0.564814	-0.0370887	-1.63638	-0.506137	-0.486966	-2.1741	-1.10286	-0.931085	-0.766355	-0.280734	0.450436	-2.30126	-0.837509	0.185986	0.475348	-0.277996	-0.151036	-0.1417	0.104788	0.276995	-0.148269	-0.418217	0.0574399	-0.55243	-0.193023	-1.17371	-0.568976	0.481667	1.0115	-0.0686207	1.15586	0.275549	0.750655	0.877873	0.753746	-0.426298	3.19288	1.21131	1.56411	2.42732	-0.55595	0.954599	1.38919	0.595256	0.578918
A_23_P381368	HOXD10	chr2	q31.1	-0.491427	-0.0408289	-0.396558	-0.430922	-0.552433	-0.091114	-0.491427	-0.484903	-0.424791	-0.310014	-0.264827	-0.525523	-0.665452	-0.567606	-0.443325	-0.536627	-0.548857	0.134117	-0.426038	-0.673619	-0.52966	-0.61455	-0.657011	-0.130684	-0.356378	-0.616515	-0.428507	-0.443752	-0.131063	-0.39502	-0.381592	0.524019	0.950182	-0.201735	0.771106	0.0494053	-0.426085	2.69733	1.49833	0.28207	-0.203836	0.138492	-0.515814	-0.317266	0.421996	-0.406455
A_23_P46781	ITGA8	chr10	p13	-0.491626	-0.388305	-0.0670973	0.0564848	-0.82469	-0.552866	-0.36368	-0.491626	-0.383827	-0.380315	-0.366138	0.68783	0.158296	-0.553352	-0.925538	-0.414525	-0.212427	0.222251	0.712238	0.092146	-0.850097	-0.820634	-0.728814	-0.520338	-0.814905	-0.907148	-0.877887	-0.737222	-0.669275	1.08045	-0.815665	-0.709956	-0.855172	-0.500863	-0.107814	-0.895849	1.48725	1.49208	-0.39264	-0.980398	-0.195365	-0.600401	-0.931618	-0.133857	-0.659088	-0.235769
A_23_P162165	KCTD14	chr11	q14.1	-0.496479	0.200275	-0.452071	-0.632977	-0.378323	-0.545884	-0.168122	-0.475399	-0.711339	-0.855041	-0.931655	-0.668836	-0.630194	-0.489617	-0.495232	0.876306	-0.281314	-0.590438	-0.77242	-0.496479	-0.276013	0.348231	0.190012	0.203581	-0.677104	-0.48764	-0.795938	-0.498017	3.23064	1.04893	1.49793	0.477128	-0.378115	-0.553482	-0.17314	-0.818751	-0.473196	-0.109418	-0.683161	-0.752716	-0.725135	-0.225348	1.85489	-0.256776	4.28949	0.268395
A_23_P38618	PIGL	chr17	p11.2	-0.499371	0.305573	-0.444452	-0.95673	-0.872099	0.0229935	-0.678715	-0.614792	1.62692	-1.28136	-0.0749672	0.573305	-0.132739	-0.479342	-0.858188	-0.673501	-0.0587852	-0.313786	-0.529975	-0.454324	-1.58064	-0.415678	-0.499371	-0.691143	-1.41811	-1.46544	0.031484	-0.363513	0.334259	0.385049	1.11353	0.755303	1.61382	-0.414048	1.83555	3.59525	-1.18389	-0.786007	-0.0746563	0.120992	1.69214	1.34376	0.269325	2.61091	1.36431	0.260634
A_23_P171223	CXorf56	chrX	q24	-0.507143	0.463061	0.00151882	-2.81243	-1.6428	-0.153123	0.658894	-1.20068	-0.908041	-0.105325	-0.920579	0.163785	-0.507143	-1.59512	-0.785919	-0.80048	-0.0302011	-1.14197	-0.388218	0.390716	-1.18651	-0.0502082	0.127979	0.0260357	-0.995461	-0.265209	0.289467	-0.892189	1.12927	1.36805	1.37534	0.384877	0.726708	-0.472356	0.34904	0.125325	-1.32856	1.14324	0.183468	1.68874	0.689048	-0.873812	0.745905	1.23584	-0.128204	0.563017
A_23_P4443	TBX4	chr17	q23.2	-0.512919	-0.000960844	-0.435371	-0.316082	-0.273321	-0.676161	-0.712368	-0.137127	-0.34325	0.0043827	0.0278469	-0.540027	-0.634985	-0.488374	-0.496044	-0.677036	-0.765147	-0.512919	-0.568907	-0.64404	-0.54013	-0.660578	-0.549081	-0.572003	-0.466472	-0.477053	-0.470436	-0.392554	0.149087	0.295001	0.0948284	3.45437	-0.132159	0.338016	0.159849	3.59951	0.0932336	1.83085	-0.605661	1.75858	-0.0619233	1.49077	0.219754	-0.48903	-0.123436	-0.435375
A_23_P319572	NR1I3	chr1	q23.3	-0.515237	0.296852	0.207092	0.309428	-0.0147491	-0.35971	-2.03707	-0.463479	-0.594562	-0.0285698	0.0531488	-0.941616	-1.5026	-0.291687	-1.03028	-1.48781	-1.78084	-0.926356	-1.27036	-0.471776	-0.515237	-0.781171	-1.16837	-0.629491	-0.390602	-0.0115626	0.0841932	0.340534	0.369836	-0.223245	1.00664	5.26299	-0.0500034	0.2079	0.138533	0.303465	-0.482319	0.29024	0.35455	1.20472	1.11273	0.220085	2.2436	0.352487	0.467276	0.648361
A_23_P66328	ACSM2B	chr16	p12.3	-0.515813	0.516534	0.331405	-0.114879	0.38351	-0.0668395	-0.468654	-0.502969	-0.641949	-0.623464	-0.0790333	-0.823584	-0.101086	-2.72318	-0.594865	-2.27886	-0.225923	-1.05476	-2.00943	-1.83046	-0.515813	-2.13376	-2.16526	-0.640025	0.65049	-0.290951	-0.0458043	1.18668	0.528917	0.107096	0.597004	-0.735008	0.529852	-0.444611	0.0737532	-0.422783	0.331405	1.09682	0.648888	-1.4619	2.3218	0.0157916	0.13152	0.504151	1.00887	1.24963
A_23_P347029	TAS2R50	chr12	p13.2	-0.518006	0.230035	0.250662	-0.518006	0.162155	-1.20231	-1.49669	0.967225	-0.371507	-0.423461	-0.707126	-1.15767	-1.47724	-0.756662	-1.02868	-0.612859	-1.56166	-0.514478	-1.47292	-0.420528	-1.3753	-0.179847	-0.790785	0.254919	-0.152895	0.340667	-0.428153	-0.279032	-0.290165	0.20944	-0.141129	-0.639818	0.588624	0.204565	0.404026	-0.542984	0.710828	0.606668	0.157138	-0.379012	0.314321	0.965654	1.14824	0.947349	0.164709	-0.12429
A_23_P92520	ANP32C	chr4	q32.3	-0.51999	0.412904	-0.256949	-0.34745	0.291726	1.0463	-0.185115	0.727427	-0.0076531	-0.261875	0.765149	-1.8601	-0.572748	-1.71735	-0.900909	-0.639284	-0.977786	-0.639767	-0.51999	-0.201364	-1.42696	-1.26295	-1.42935	-0.29332	-0.327165	-0.0718271	0.562653	-0.624523	1.14787	3.18177	0.204713	-0.36346	0.687779	1.10081	1.87265	0.272775	1.6477	2.12463	-1.02697	-0.274981	1.74929	0.530074	-0.283749	0.875426	1.45655	1.42053
A_23_P114095	MBTPS2	chrX	p22.12	-0.523803	0.5411	-0.0241998	-0.758021	-0.521516	-0.604124	-0.198294	-0.264643	-0.60097	-0.692936	0.0309516	0.15032	-1.49856	-2.53154	-0.430893	0.632566	-1.70087	-0.492983	-0.145571	0.465635	0.116572	-0.523803	0.559278	-0.652067	-1.0387	-1.08415	-1.51263	-1.81684	1.23624	1.214	0.4158	0.511109	0.23337	-0.130681	2.63162	-0.0726521	-0.537935	-0.857478	-0.236776	-0.595228	0.592355	0.226098	0.57109	1.44836	0.882225	1.02035
A_23_P118266	ZFHX3	chr16	q22.2	-0.526523	0.547311	0.103428	-0.284643	-0.289294	-0.486887	-1.50247	-0.97279	-0.637392	-0.388634	-0.343167	-0.593786	-0.526523	-0.344932	-0.480928	-0.745858	0.376891	0.312498	-1.28299	-1.83027	-0.667912	-0.257536	-0.766115	0.0836515	-1.32221	-0.779473	-0.488837	-0.18637	0.426187	1.4433	1.20627	0.440548	1.58254	-0.388374	0.16183	0.369565	0.304678	1.73945	0.634277	0.346058	0.103428	1.69127	2.51571	0.883295	0.26735	1.33641
A_23_P43810	LTBP1	chr2	p22.3	-0.533368	0.702068	-0.471972	-0.64768	-0.215801	-0.40014	-0.0431113	0.659822	0.781362	0.388125	-0.280409	-0.000708485	-0.533368	-0.773586	-0.889459	-0.159406	-0.896635	-0.979948	-0.943007	-1.36711	-0.14307	-0.856624	-0.248179	-0.29893	-0.796589	-0.298459	-0.619799	-0.750584	1.22172	2.72557	2.57488	1.51712	0.425593	0.469009	1.66001	1.19484	0.10426	0.827089	1.16513	0.937688	-0.642948	1.73106	1.56338	1.61798	-0.450921	2.07704
A_32_P107876	FRAS1	chr4	q21.21	-0.534776	-0.356676	0.0774287	0.049442	-0.0924444	-0.624971	-0.58533	-0.900087	-0.534776	-0.428622	-0.536484	-1.05121	-0.201071	-0.262958	-0.587895	-0.980873	-0.230991	-0.494069	-0.550368	-0.736752	-0.408838	-0.942984	-0.593672	-0.434424	-0.519223	-0.715382	-0.492549	-0.520124	-0.0266073	-0.625818	-0.446189	-0.72001	-1.00413	0.151923	-0.510108	-0.25382	-0.167712	0.107735	0.0774287	-0.0881698	1.71251	2.61991	0.203261	-1.14419	0.280558	-0.576892
A_23_P139864	GSG1	chr12	p13.1	-0.53579	-0.03426	-0.252246	-0.194594	-0.40028	-0.720823	-0.885674	-1.02578	-0.521	-0.46822	-0.5018	-0.92917	-0.680922	-0.319385	-0.68599	-1.01377	-0.624197	0.0738498	-0.76548	0.622862	-0.53579	-1.03025	-1.05384	-0.416116	-0.40181	-0.420679	-0.343067	-0.371819	2.48182	2.95327	3.43828	-0.335363	3.27902	0.325567	2.75408	-0.267057	-0.415117	-0.168393	-0.252246	-0.317573	-0.329653	-0.59967	-0.402046	-0.308768	-0.269231	0.0241866
A_23_P76435	GATC	chr12	q24.31	-0.536009	0.536787	-0.18021	-0.82968	-0.790915	-1.341	-0.161663	-0.929428	-0.775385	-1.1077	-0.745842	0.839157	-0.0745557	0.275666	-0.536009	-0.731528	-0.382088	-1.30722	0.508905	-0.240838	-1.16308	-0.0411053	-0.498182	0.196835	-1.31131	-0.290183	0.362539	-1.89631	0.962904	1.16564	-0.0760961	-0.380128	0.383484	-0.375172	1.97412	1.30432	-0.18021	2.66624	1.58197	1.04637	0.338577	-0.701008	0.0169573	1.00802	0.819861	0.45698
A_23_P3204	MAPK6	chr15	q21.2	-0.538285	0.466114	0.0538154	-1.35709	-0.126314	-0.628381	-0.655325	-0.479927	-0.538285	-0.350596	0.811421	-1.4687	-0.936865	-2.61657	-0.750384	0.119166	-0.370079	-0.278972	-0.0590624	0.298857	0.123553	-2.05571	-0.189117	-0.942173	-0.743224	-0.508054	-0.734902	-0.996295	2.18624	1.57843	1.08362	1.09869	0.909533	2.36713	1.09682	-0.541152	0.0159706	0.978205	-1.08216	-1.06493	1.48672	-0.495201	-0.514094	-0.0848975	0.105128	0.651275
A_23_P38732	CDH2	chr18	q12.1	-0.540139	0.681035	-0.176706	-0.435576	-0.21367	-0.893869	-0.419008	-0.540139	-1.36967	-0.947957	-0.250093	-2.07967	-0.968563	-0.321974	-0.797478	-0.868696	-0.798184	-0.223918	0.10706	-0.593692	0.303006	-0.514412	-0.481102	-1.05092	-0.926026	-0.996841	-0.031803	-0.16226	2.51727	2.40427	2.5391	0.889665	1.34574	0.717474	3.46113	1.49311	0.720873	1.08677	0.659675	-0.408917	-0.23508	1.04895	-0.61233	-0.540055	1.04183	0.644596
A_32_P130309	TEKT5	chr16	p13.13	-0.541621	0.392969	0.026559	-0.137015	-0.49013	-1.11106	-0.705106	-0.538619	-0.231468	-0.120102	0.026559	-0.865488	-0.297795	-1.3494	-0.660365	-0.541621	-1.8241	-1.61459	-1.44929	-0.37552	-0.737673	-0.927825	-0.84135	-0.396134	0.0194765	0.0040826	-0.513628	0.51524	1.79563	0.571104	1.68408	-0.389088	-0.584244	-0.42754	0.0286089	4.77324	-0.831413	-0.788981	0.191162	0.279508	0.493851	-0.861161	1.33913	0.623065	0.650668	0.169829
A_23_P124892	KISS1	chr1	q32.1	-0.544563	0.179248	-0.0153083	-0.449082	-0.314176	-1.11668	-1.60942	-0.271756	-0.476698	-0.587375	-0.728793	-0.544563	-1.22995	-0.214659	-1.36915	-1.17903	-1.27622	-0.545745	-1.34153	-0.220952	-0.5829	-0.539233	0.00274074	-0.0153083	0.00508003	-0.264173	-0.804131	0.308033	-0.436761	-0.444047	-0.540189	0.208412	1.43491	5.35487	0.0606767	-0.152427	0.064132	-0.0454605	-0.350419	0.671587	-0.263029	0.198318	0.0361722	1.35661	0.423763	0.311732
A_23_P142096	GPR32	chr19	q13.33	-0.545125	0.318442	-0.311184	-0.666123	-0.503876	-0.88434	-0.960063	-0.466682	-0.430167	-0.749388	0.144036	-0.268864	-0.821219	-0.109474	-0.557572	-0.170624	-0.8645	-0.545125	-0.80057	-0.416958	-0.915788	-0.445151	-0.195971	-0.656459	-0.24353	-0.564448	-0.676192	-0.151472	4.34917	3.62065	0.843809	-0.232586	-0.2755	-0.0943752	0.168016	0.249426	-0.469652	2.2419	-0.0198401	-0.659269	-0.729147	-0.291671	0.672402	1.72339	1.24052	0.933212
A_23_P25003	CLIP1	chr12	q24.31	-0.54658	0.629233	-0.0205437	-0.143043	-1.00409	-0.373816	-0.383821	-0.649459	-0.54658	-0.235546	-0.806428	-0.203429	-0.519413	-0.406813	-0.729219	0.228817	-0.581959	-0.501107	-1.35599	-1.44264	-0.967454	-0.732381	-0.923932	-0.265687	-1.34587	-1.315	-0.165649	-0.063185	0.361209	0.245381	1.10753	-1.3129	1.30192	1.07409	0.587642	-0.390089	0.54989	0.684462	0.192482	-0.737849	0.228273	-1.29299	0.67603	-0.947278	2.6505	1.2063
A_23_P335277	PART1	chr5	q12.1	-0.546707	0.0979762	-0.22319	-0.165803	-0.306146	-0.730639	-0.300784	-1.16477	-0.762409	-0.38441	-0.446295	-1.39001	-0.361718	-1.10464	-1.23926	-0.329668	-0.0930247	0.00740543	-0.797818	0.262008	-1.09	-1.88516	-1.74108	-0.22319	-0.44862	-0.546707	-0.295428	-0.900079	-0.423836	0.277492	-0.121653	-0.616272	1.47006	-0.239224	-0.448242	-0.667119	-0.704702	2.03773	-0.922426	0.0913297	-0.938986	0.291965	1.99994	0.163157	-0.30211	3.56196
A_23_P13711	MLL2	chr12	q13.12	-0.547105	0.833715	-0.273896	-0.895812	-1.34997	-0.261725	-0.409001	-0.389056	-1.44287	-1.301	-1.25336	-0.822255	-0.547105	-0.662663	-0.405145	-0.210638	-0.196936	-0.441108	0.13153	-0.269475	0.257227	-0.593619	-0.527688	-1.46164	-0.560066	-0.941144	-1.23951	-0.655318	0.587867	1.33661	0.779153	-1.16812	1.74439	1.40237	1.27274	0.75936	1.23216	1.27432	1.4027	-0.887389	0.511477	0.7335	1.09133	1.23194	1.19624	0.888276
A_23_P74809	CLCC1	chr1	p13.3	-0.552179	0.580423	0.0383422	0.0412229	0.785548	-1.05432	-0.789822	-0.838363	-0.225078	-0.524612	0.676686	-0.525188	-0.738495	-0.381917	-0.893218	-3.81724	0.128609	-0.94561	-0.886631	-0.886321	-0.902351	-0.475312	-0.422228	-0.993893	-0.405362	-0.457495	-1.12471	-0.552179	1.35506	1.15898	0.614739	-0.122008	0.634217	0.199969	0.444652	-0.658301	-0.13285	1.48093	1.3034	-0.118351	1.24374	1.50654	1.69631	1.82367	2.00793	1.24963
A_23_P100056	RBPMS2	chr15	q22.31	-0.555936	0.611037	0.0324241	-0.0188853	0.590478	-0.974203	0.386197	0.0403527	-0.657838	-0.739451	0.706235	-0.483462	-0.112762	-1.29242	-1.07803	-0.555936	-1.42981	-0.784044	0.452442	-0.505166	-0.739556	-0.861504	-1.94272	-1.33059	-0.44235	-0.902102	-0.531176	-0.221738	1.45342	0.940962	1.42444	2.34751	-0.639763	0.235356	1.42365	0.632583	0.167862	2.68752	-1.25878	-1.24176	0.0899565	0.0324241	0.933469	0.589491	2.0648	0.0125086
A_23_P65466	RAB2B	chr14	q11.2	-0.557276	0.439613	-0.125886	-0.943971	0.205992	-0.467344	-0.11738	-0.301791	-1.45153	-0.0919073	0.555119	-0.557276	-1.74101	-1.28576	-0.696555	0.643879	-0.691898	-0.203477	-0.371128	1.76867	0.711622	-0.612875	-0.215392	-0.831015	-1.49576	-1.48264	-1.32901	-1.17887	1.9657	0.59694	0.214836	1.10339	1.63041	1.29187	1.9118	1.86535	-0.0975625	-0.646791	-0.971206	0.315811	0.274161	1.92536	1.28867	0.293393	0.250505	0.4536
A_24_P323941	C20orf106	chr20	q13.31	-0.557351	0.426657	-0.008406	-0.557351	-0.973421	-1.40481	-2.24936	-0.955226	1.93918	0.0617417	0.192356	0.0149515	-1.22219	0.145538	-1.90849	1.72974	-1.32369	-0.226821	-1.36715	-1.38559	-0.736344	-1.2365	-0.431433	-0.008406	-0.408068	-0.195323	-0.0286385	-0.515675	0.178221	0.999456	0.836979	-0.118168	0.633081	1.00304	2.03565	3.42452	0.990711	1.50863	-0.077732	-0.0855677	0.866925	1.08306	0.66028	1.89715	-0.834023	0.206743
A_23_P19176	C5orf46	chr5	q32	-0.560975	0.409707	-0.180416	-0.290947	-0.670458	-0.560975	-0.300198	-1.21326	0.692225	-0.52915	-0.466299	0.574074	-0.251992	-1.84861	-0.396852	-1.49052	-0.601872	-1.88284	0.276254	-2.03134	-0.715686	-1.30795	-1.71301	-1.10113	0.44405	-1.00677	-0.453973	-0.321458	1.0981	0.219834	0.282672	0.300103	-0.484872	0.51931	0.957206	1.36768	-0.941191	-0.618172	1.77335	0.0250922	-0.0128499	-0.583286	-0.449468	1.57542	0.864301	1.6719
A_24_P911960	DNM1L	chr12	p11.21	-0.563052	-0.0313873	0.0674079	-0.563052	-0.555875	-0.639487	-1.11647	-1.2772	-0.491616	-0.499499	-0.571367	-0.840446	-1.08399	-1.05868	-0.335391	-0.451195	-1.09228	-0.0256463	-0.580979	-0.0747644	-1.13019	-0.150916	-2.02801	0.311843	-0.449591	-0.550613	-0.325971	-0.58751	-0.300856	-0.835072	0.0099021	-0.798041	0.2239	0.795342	-0.328756	-0.65287	1.55172	0.292076	1.47268	-0.376042	2.21007	2.12441	2.89042	-0.191818	-0.215888	-0.548526
A_23_P137957	RSBN1	chr1	p13.2	-0.564962	0.53956	-0.101191	-1.08346	0.199146	-0.455502	-0.933658	-0.346666	-0.485702	-0.425876	-0.408925	-0.640151	-2.01619	-1.46059	-0.564962	-0.96283	-1.04571	-0.83628	-0.861275	-0.187476	0.184528	-0.41954	0.702508	0.878103	0.112852	-0.0889814	-1.52629	-0.880778	1.03949	0.0101359	0.27831	0.390513	1.20884	1.03089	1.11331	-0.863695	0.932915	1.68099	0.638605	0.938	0.768339	-0.790258	4.43921	1.39396	0.510305	-0.279857
A_23_P250910	UBQLN1	chr9	q21.32	-0.5676	0.263353	0.220898	-0.95644	-1.34885	-1.38238	-0.693694	-0.123363	-0.00325565	-0.882135	-0.481591	-1.15801	-1.46921	-0.364877	-0.5676	-0.0420351	-1.44409	-0.314516	-1.44156	-1.1623	-0.0929558	-0.464985	-0.529087	0.377566	-0.466369	-0.219742	-0.720235	-0.268914	0.233241	0.654582	0.149002	-0.0507801	0.709667	0.623641	2.90441	0.728727	1.2174	0.798933	3.4366	-0.293267	-0.896108	-0.23599	-0.415878	-0.238614	0.173543	0.368178
A_23_P128094	ABCB9	chr12	q24.31	-0.568707	0.395697	-0.560795	-0.967664	-1.49771	-0.19092	-0.568707	0.0456779	-0.775005	-1.27006	-1.39527	0.574416	-0.851101	-0.237101	-0.187746	-0.310255	-0.581555	-0.264321	-0.203085	-0.936106	1.21835	-0.309685	-0.579313	0.875111	-1.22936	-0.204237	-0.841897	-1.37036	2.07451	2.362	0.494345	1.86141	0.28968	0.155854	0.571853	0.362932	-0.586413	-0.793028	-1.27404	-0.281371	0.58777	-0.56161	-0.0869809	2.09558	0.0636615	1.97652
A_23_P386420	GTF2H3	chr12	q24.31	-0.569236	0.530404	-0.35051	-0.934714	-0.474544	-0.819672	-0.639542	0.218728	-0.0709807	-1.64802	-0.449631	-0.0802605	-0.738645	-0.719915	-0.145525	0.369721	-0.466483	-1.77313	0.125436	-0.156401	-1.23449	-0.126353	0.0431694	0.331926	-0.741104	-0.752448	-0.569236	-1.26653	0.907518	2.18915	0.0148622	-0.32677	-0.0813091	-0.194652	1.0174	0.87027	-0.539051	0.0996841	-1.1561	-0.798988	0.43645	-0.275524	0.714175	0.806161	1.67415	1.59497
A_32_P190151	FAM86B1	chr3	p12.3	-0.569868	0.426074	-0.222493	-1.17632	-0.533464	-0.966578	-0.59984	0.13685	-0.219575	-0.247544	-0.491209	0.467861	-0.596586	-1.15359	-0.126557	0.183449	-0.77652	-0.213671	-0.795597	-0.472005	-1.06393	-0.684859	-0.341693	0.310072	-0.569868	-0.99454	-1.28419	-0.267499	0.511043	-0.645902	-0.632999	-0.277287	-0.616368	-0.754713	2.93661	0.337415	-1.72899	0.282267	0.254418	1.2816	-0.542006	0.842168	-0.154133	0.35708	1.26896	1.43042
A_24_P381803	UBE3A	chr15	q11.2	-0.571199	0.707474	0.113952	-0.928886	-0.571199	-1.31933	-1.32428	-0.833361	0.591039	-0.866572	-0.115448	-2.2476	-1.31157	-2.16131	-0.601935	-0.350988	-0.779607	-0.318776	-0.433659	-0.15842	-0.471608	-0.216373	-0.507752	-1.73048	0.692485	0.868031	-0.577049	0.458161	1.41303	1.48375	1.54872	0.371301	1.58257	0.880216	1.3469	0.382968	0.987836	0.895924	-1.8625	-1.40873	0.730358	0.668909	1.46754	1.03254	0.732099	0.189327
A_24_P305345	CLEC4M	chr19	p13.2	-0.572476	0.160231	-0.17243	-0.456953	-0.740939	-1.04812	-0.723994	-0.281514	-0.467655	-0.94526	-0.769996	-0.470994	-0.845191	-0.310362	-1.07595	-0.335065	-1.00881	-0.572476	-0.861049	-0.109732	-0.175291	-0.620981	-0.429086	-0.910056	-0.0216231	-0.969812	-0.973289	0.455954	1.47735	-0.313589	-0.841984	0.551842	3.02289	-0.388379	-0.751551	-0.0457528	-0.986573	2.62833	0.39984	-0.137302	-0.500859	-0.125551	-0.211901	0.12733	0.513952	2.81693
A_23_P55468	TIMM22	chr17	p13.3	-0.574879	0.718542	0.216194	-0.502728	-1.01944	-0.693529	-0.375009	-0.053595	0.52615	-0.397492	-0.127216	0.321612	0.0124639	-1.19797	-1.06746	-0.747762	-1.52708	-0.215935	-0.574879	0.679608	-0.158416	-0.202646	-2.04234	0.122674	-2.0858	-2.54699	-1.17987	-0.676293	1.63991	1.08428	1.31885	1.25839	1.28353	0.919601	3.60188	-1.01328	-0.38145	1.58847	-0.455221	0.114517	0.614718	0.416765	0.804629	1.0569	0.103938	0.916293
A_23_P250607	PLS3	chrX	q23	-0.57617	0.660387	0.0966978	-0.342162	-0.429757	-0.57617	0.117662	-0.239907	0.0458671	-0.00843452	0.428779	0.671135	-0.16936	-0.893714	-0.896606	-0.874152	-0.738472	-0.0313258	-0.394302	-1.30304	-0.149543	-0.680975	-0.969584	-1.42601	-1.33867	-1.32488	-1.716	-1.38597	1.59493	1.41148	2.2097	-0.365043	0.438705	1.14763	0.948715	0.743251	1.59157	0.991178	0.227767	0.115208	-0.244621	-0.55985	-1.05172	-1.45978	0.926309	1.44273
A_23_P50008	TTC19	chr17	p12	-0.583691	0.622034	-0.0331522	-0.217468	-0.583691	-0.72217	-2.07189	-1.09545	-0.254778	-0.360548	-0.396412	-1.6229	-0.94266	-0.869382	-0.429121	-2.9673	-0.33647	-1.5058	-0.344055	-0.274981	-0.615853	-0.628021	-0.425894	-0.569061	-0.57986	-0.895424	0.893425	0.211229	-0.132755	-0.122724	0.439616	0.466594	1.06151	1.0342	1.59625	0.760054	0.681069	-2.31549	-0.38965	0.406805	0.973936	0.997507	3.79413	1.03874	0.448578	-0.00658189
A_23_P301476	C3orf33	chr3	q25.31	-0.584714	0.699545	-0.290636	-0.810563	-0.196382	-0.589302	-0.736458	-0.762705	-0.260946	-1.04902	-0.696812	-0.584714	-1.34588	-1.42037	-0.366256	-0.80727	-1.59997	-0.929266	0.455964	-0.283324	0.548251	-0.462267	0.00272611	-0.290636	0.0576462	0.639552	-0.0961196	-1.87636	0.438359	1.40217	0.62767	-0.507216	-1.53659	-0.194332	1.39759	1.4613	0.0308298	-0.055467	-1.00638	-0.71206	1.01857	-1.63572	0.743317	1.17851	1.75074	-0.773709
A_23_P51996	STXBP3	chr1	p13.3	-0.587596	0.908842	-0.304415	-0.165262	-0.796999	-0.333439	-1.27077	-1.42065	-0.144363	-0.516957	-1.06597	-0.893533	-0.858007	-0.393999	-0.434841	-1.00026	-0.637165	-0.555176	-0.891965	-0.587596	-0.134512	-0.639043	-0.811579	-0.304415	-0.13946	0.546048	-1.62388	-0.287288	2.52294	0.568204	1.06549	1.84191	2.135	1.51455	1.06637	1.39453	-0.367795	-0.0682424	1.89124	1.13843	0.515269	1.20838	1.00654	-0.331478	1.67015	1.42367
A_24_P20954	TFAP2B	chr6	p12.3	-0.588455	0.174565	-0.483886	-0.438776	-0.513707	-0.653672	-0.644507	-0.769086	-0.526764	-0.495713	-0.506101	-0.737557	-0.58634	-0.77095	-0.583836	-0.761188	-0.606432	-0.730614	-0.588455	-0.741586	-0.336115	-0.712249	-0.709609	0.431968	-0.519698	-0.544782	-0.493536	-0.510574	2.65545	2.54648	2.76696	1.49055	2.61332	1.74168	0.886267	-0.417095	-0.455848	2.64947	0.555575	-0.257636	0.148932	-0.403194	1.63588	-0.0661565	-0.48768	-0.218002
A_24_P308506	NAT8B	chr2	p13.1	-0.590341	0.555484	0.341587	0.186674	0.124645	-0.513025	-2.36123	3.57676	0.577702	-0.590341	0.0158321	-0.775071	-1.955	-1.09601	-0.362145	-2.03187	-1.70325	-1.74661	-2.0812	-1.28479	-0.588463	-1.12293	-2.078	-0.47933	0.142042	-0.118839	0.173499	0.266023	0.620162	-0.00332228	-0.577634	1.63678	0.783455	-1.05467	0.165775	-0.469459	0.194078	0.70027	0.377988	0.8247	0.36039	0.341587	0.597765	0.972292	0.782586	0.714032
A_32_P49199	PGR	chr11	q22.1	-0.590946	-0.114397	0.189729	-0.785076	-0.570183	-1.51465	-0.345804	-2.23034	-0.590946	-0.569974	-0.673937	-0.915619	0.948395	-0.987873	-1.14101	-0.734273	-0.832094	0.132688	-1.42923	-0.730973	-0.634563	-0.571713	-0.491037	-0.057378	-0.17648	-0.210697	-0.489225	-0.373908	-0.582956	0.513965	-0.637061	0.163177	-0.4795	-0.339627	-0.427841	-0.526598	1.66678	0.358086	-0.613881	-0.561169	-0.29793	1.39514	-0.218113	3.43001	-0.194625	0.177632
A_32_P389770	PRR10	chr11	q24.2	-0.592159	0.18646	-0.0594228	-0.492589	-0.101696	-1.69757	-1.67132	0.369101	-0.652198	-0.033251	1.44817	-0.592159	-1.50403	-0.719305	-1.71636	-0.0501046	-1.92928	-0.535239	-1.99454	-0.318245	-0.925195	-0.0896368	0.37106	-0.171522	-0.883795	-0.608299	-0.493285	0.725574	0.269945	0.102954	-1.18279	1.79368	1.17247	-0.277043	2.17445	0.574449	-0.365712	0.0629812	-0.448832	2.03567	0.0316487	0.487517	1.72649	0.20829	-0.0364889	-0.134657
A_23_P9018	DEFB104A	chr8	p23.1	-0.592678	0.443028	0.524697	0.392503	-0.638345	0.0311046	-2.28834	-1.06897	0.00392737	0.799919	0.998565	-0.592678	-2.44553	-1.70039	0.0495249	-2.28321	-0.56317	-1.57475	-1.49784	-1.66885	-0.263647	-1.88685	-2.1032	-0.200332	0.259701	0.256404	0.234231	0.871459	0.570472	-0.0510763	0.73888	-0.228557	0.514059	0.553409	-0.0033955	0.14328	0.136083	0.371998	0.573465	-0.929905	1.38438	0.524697	0.653416	0.261274	0.795193	1.30659
A_23_P25313	BRI3BP	chr12	q24.31	-0.592715	0.422793	0.187022	0.348329	-0.788374	-0.892048	-1.46776	-0.974513	-0.396605	-0.464465	-1.10225	-0.497707	0.0444998	-0.65884	-1.04352	-0.592715	0.257476	-0.485392	-1.07804	-0.165978	-1.40375	-0.694798	-1.60775	0.502354	-1.11598	-0.547911	0.218043	-0.502256	-1.10505	1.2386	0.810104	-1.23688	0.791558	-0.661784	1.37139	2.58138	1.12819	0.435808	0.296917	-1.28695	0.598028	0.68613	2.08352	1.74843	1.62356	-0.256121
A_24_P99639	NEK8	chr17	q11.2	-0.593235	0.338539	0.0549269	-0.41132	-0.519656	-0.0136637	-0.171309	-0.593235	-0.929745	-0.0524298	-1.10654	0.578965	-0.617553	-0.731253	-0.998787	-0.395273	-0.837876	-0.263467	-0.752093	-0.305172	-1.42446	-0.473704	-0.209126	-0.671301	-1.56152	-1.204	-0.676988	-0.640701	1.25344	2.06471	1.32244	0.262519	1.00378	-0.147679	1.87937	0.401303	-0.0653547	1.00745	-0.785819	-1.24989	0.428841	1.36424	1.26437	1.63855	0.771631	1.35504
A_23_P68970	ARFGAP3	chr22	q13.2	-0.593984	0.551682	-0.0394457	-0.132012	-0.27026	-0.766067	-1.34373	-0.82995	1.83597	-0.247525	0.83766	0.405076	-0.603866	-0.411467	-1.06068	-1.39794	-1.33328	-0.98202	-1.32743	-0.544242	-0.260925	-1.93437	-1.77327	-1.01174	-0.277376	-0.51369	-0.557433	-0.593984	0.396541	1.02905	0.731707	1.37877	1.96072	0.747407	-0.69348	0.275747	-1.04266	0.114202	-1.35247	1.74277	1.83927	-0.415939	0.448636	2.77285	2.0332	1.36622
A_24_P137582	GFM2	chr5	q13.3	-0.594236	0.625653	-0.468716	-0.639466	-0.508312	-0.498928	-1.00234	-0.909584	-0.0855431	-0.972181	-1.18561	-0.594236	-1.62606	-1.45182	0.327496	-0.218719	-0.67972	-0.919983	-0.280395	-0.289668	-0.796048	-0.190948	-0.947928	0.790986	-0.412766	-0.581032	-0.311794	-1.07251	1.32342	0.896268	1.21624	0.135844	1.58157	-0.416127	-0.916045	0.690172	1.83669	1.73489	-0.32474	-0.334278	1.48404	1.73001	1.58611	2.19285	0.348335	0.656898
A_32_P6015	MNX1	chr7	q36.3	-0.595328	0.0338263	-0.50855	-0.546279	-0.634112	-0.627621	-0.535661	-0.629347	-0.612936	-0.619462	-0.604589	-0.60433	-0.584101	-0.554736	-0.636218	-0.434365	-0.55174	0.257726	-0.54749	-0.550552	-0.637707	-0.627315	-0.595328	-0.398218	-0.624316	-0.57733	-0.568128	-0.627356	2.6229	2.92483	3.06915	1.63245	2.42149	0.386572	-0.16083	0.540342	0.783597	0.292475	-0.221895	-0.433227	1.52593	3.01172	-0.129839	0.0241634	-0.013297	-0.551746
A_24_P252497	TRIB1	chr8	q24.13	-0.595761	-0.200275	0.686029	-0.902355	-0.595761	-1.13879	-0.885668	-0.611904	-0.500175	-0.323231	0.492944	-0.348329	-0.578821	-0.234774	-1.37504	-1.37416	-0.307894	0.249192	-1.29542	0.682784	-1.03269	-0.613883	-1.34618	0.18946	-0.0682149	-0.687402	0.257348	-0.505817	-0.357651	-1.14264	-0.630455	-0.250716	-0.620896	-0.662772	-0.616242	-0.149834	-0.0805185	-0.331273	-0.640384	0.191154	0.340059	0.915355	-0.801987	-1.48802	-1.83867	0.151975
A_23_P69617	UNC5C	chr4	q22.3	-0.598726	-0.287003	0.573945	-0.629357	-0.723938	-1.37048	-1.21384	-0.374748	0.27219	-1.10211	-0.78753	-0.699356	-0.64899	-0.298641	-0.183004	-0.823099	0.0134695	0.0683463	-0.646192	0.562158	-0.647636	-0.409479	-0.447126	-0.346263	-0.131225	-0.534635	-0.685374	-0.598726	-0.900955	0.36293	-0.900023	-0.862534	-0.712009	-0.722521	0.299673	0.983894	-0.61744	3.2411	-0.623662	-0.357516	3.74274	2.16585	0.156984	-0.921413	-1.0397	-0.369863
A_23_P92650	SLC25A2	chr5	q31.3	-0.599306	0.554735	0.0655059	-0.989843	-0.249431	-0.111854	-2.86366	-0.599306	2.05468	0.290558	0.826291	-0.812449	-1.70978	-1.70543	0.0820456	-1.02693	-1.69125	-0.498478	-1.30154	-0.681694	-0.481889	-0.688956	-1.46577	-0.451893	-0.446867	-0.502294	0.23644	-0.475108	1.08983	0.599959	1.05462	0.491541	0.889391	0.50951	0.349481	1.1305	0.0198838	1.1509	0.492411	-0.115949	1.70997	1.19681	1.36805	0.870701	1.6629	0.277586
A_23_P373521	HAND2	chr4	q34.1	-0.5996	-0.165058	-0.471663	-0.675972	-0.429654	-0.758884	-0.664957	-0.572581	-0.565388	-0.505804	-0.412636	-0.52493	-0.603384	-0.660825	-0.552669	-0.579931	-0.623708	-0.676259	-0.681849	-0.5996	-0.685812	-0.607668	-0.62505	-0.430955	-0.585663	-0.535277	-0.581653	-0.496057	-0.474325	-0.490106	-0.622395	0.21704	1.07022	-0.502239	1.1587	-0.259146	-0.104059	3.02288	1.15369	1.67462	-0.162302	1.42399	2.16785	0.889397	1.34465	-0.473142
A_23_P99076	PRH2	chr12	p13.2	-0.600796	0.260399	0.109045	-1.09318	-0.425768	-0.487184	-1.84029	0.199548	-0.164312	-0.219138	-0.973453	-0.661379	-1.71689	-1.36355	-0.893449	1.95382	0.217409	-0.237434	-1.3364	-0.429991	-1.69978	-0.435006	-1.84181	0.967546	-0.950205	-0.129421	-1.62124	-0.600796	-0.469646	0.0818278	0.0794485	0.693769	0.268832	0.283252	0.823545	-0.609886	0.306119	1.65404	2.53817	0.616099	1.35659	0.7422	1.3268	0.139695	-1.02381	-0.371362
A_23_P24535	TTC12	chr11	q23.2	-0.601001	0.638911	-0.201035	-0.909281	-1.39751	-0.772983	-0.589222	-0.327136	-0.911737	-0.782791	-1.09448	-0.0710979	-0.071274	-0.371486	0.757169	-1.36923	-0.332731	-0.156522	-0.477234	-1.00116	-0.218344	-0.87235	-0.601001	-0.569635	-1.2829	-0.932603	-1.06406	0.411156	0.668565	0.962662	1.83937	-1.29054	-0.754072	0.609256	0.37589	-0.199985	0.282817	1.27252	2.15827	1.87934	-1.2788	-1.4704	1.93175	1.59186	1.41775	1.35022
A_23_P144476	SPRY1	chr4	q28.1	-0.605081	0.509467	0.327101	-0.459965	-0.875498	-0.711773	-0.384294	-0.285167	-0.0936763	-0.529733	0.92156	-0.605081	-0.416083	-0.0888666	-1.71914	-0.760202	-0.677668	-0.318399	-0.564175	0.473076	-1.62755	-1.6714	-1.29394	-0.753595	-0.391268	-1.80797	-1.60014	-0.849712	1.68846	1.42916	1.35131	0.356875	-1.27453	0.00219016	1.87437	0.75485	-0.737608	1.35237	-1.13031	-0.767828	0.0492656	-0.0940082	0.105899	0.518609	1.71309	1.69728
A_32_P494620	LHFPL5	chr6	p21.31	-0.605425	0.258582	0.0993509	-0.162042	-0.422486	-0.251171	-1.47346	-0.46715	-0.437298	-0.605425	-0.260443	-0.433515	-1.57394	-1.49482	-0.375583	-1.85382	-0.201616	-1.64127	-0.930517	-1.01355	-0.474364	-1.65724	-1.14524	-1.16864	0.510651	-1.5631	-0.636088	0.261604	0.591363	-0.177044	0.241201	-0.148201	-0.174708	-0.62538	0.471818	0.275962	-0.320358	0.0540122	0.302515	3.1468	1.28767	0.828436	0.21323	1.26182	0.651202	1.25586
A_23_P70733	TAAR2	chr6	q23.2	-0.605961	0.611117	0.0687735	0.114315	0.48894	-2.12022	-2.14412	0.935493	-0.605961	-1.29373	-0.248185	-0.267069	-1.79185	-0.128067	-1.69978	-1.53821	-2.18959	-1.2025	-1.77231	-0.431463	-2.05189	-0.34683	-1.59078	0.175719	0.365566	-0.00414525	0.012423	0.636563	0.695069	0.494406	-0.263166	1.2799	0.605119	0.0385087	0.782289	-0.167738	0.0580838	1.18874	1.51718	0.504923	-0.304328	0.0687735	0.617115	0.983056	0.844639	0.843426
A_23_P32177	LHX6	chr9	q33.2	-0.608025	-0.0267243	0.194898	-1.0187	-1.10009	-1.34983	-0.0186117	-0.0730114	0.248693	-0.299877	1.39022	-0.433139	-0.550612	-0.559516	-1.15695	-0.969344	-0.0648073	-0.10211	-0.997131	-1.11913	-0.80875	-0.608025	-0.938682	-1.19839	-0.800874	-0.603315	-0.387438	-1.40343	-0.200488	-0.0339743	-0.253673	-0.558254	-0.627745	0.0196497	-1.14902	0.423365	0.570241	-0.0892283	0.0882908	0.484218	-0.27082	0.134177	-0.854336	-0.290157	-0.770319	0.836587
A_32_P204676	FABP5	chr8	q21.13	-0.608715	0.28813	0.217219	-1.36783	-1.26246	-0.223432	-1.25356	-0.471242	-0.279578	0.158374	0.344222	0.125917	-0.270914	-0.556271	-0.602594	-1.44617	-0.745654	0.0282989	-0.974161	-1.23321	-0.608715	-0.857094	-1.06116	-0.050164	-1.37385	-0.995674	0.153502	-0.300214	1.90455	1.30256	1.4275	-0.691921	-1.69143	0.194743	-1.20797	1.07749	0.63579	0.139177	-1.2484	1.8007	0.563924	-0.567732	0.284141	-0.40343	2.4443	1.18862
A_23_P251974	ZFYVE9	chr1	p32.3	-0.609695	0.631172	0.168816	-0.713632	0.100673	-1.46167	-0.125584	-0.401521	-0.802122	-0.433119	0.412324	-0.881725	-1.6708	-2.14853	0.0595258	0.479699	-1.31216	-0.917071	0.183312	-0.526725	-0.244092	-0.813997	-0.28446	0.339132	-0.609695	-0.582497	-0.890789	-1.0102	0.669483	1.27595	0.592862	-1.26606	0.374171	0.518807	2.8815	-1.04333	1.74007	0.803705	0.763008	-1.30767	0.340764	-0.766765	2.00949	0.901043	-1.57525	0.299769
A_23_P71570	OSR2	chr8	q22.2	-0.611185	0.0528071	-0.134827	-0.251407	-0.785437	-0.542651	-0.310008	-0.708111	-0.611185	-0.443657	-0.342122	-0.317448	-0.602562	-0.519226	-1.0606	-0.583063	-0.511635	-0.721408	-0.466422	-0.978755	-0.559275	-0.671136	-0.967646	-1.03165	-0.673144	-0.753508	-0.924532	-0.72057	-0.297058	0.1106	-0.617422	3.27607	0.305589	0.444853	0.439162	1.53597	0.55803	2.26652	1.76447	2.03164	0.795849	2.35743	3.51769	-0.347255	-0.0792624	0.432418
A_23_P252362	MRPS30	chr5	p12	-0.613457	0.357856	0.0389709	-0.862648	-0.451939	-1.00291	-1.12744	-0.820696	1.03016	-0.613457	0.698883	0.342488	-1.25486	-2.33237	0.608077	-0.055362	-0.495218	-0.628964	0.0310244	0.0743641	-1.32745	-0.517165	-0.671384	0.953089	-0.586258	-1.20114	-0.789166	-0.424586	-0.0971835	-0.533596	-0.106289	0.0921373	0.914642	-0.00371011	1.25604	3.0427	0.788428	1.05073	0.900258	0.212671	1.79922	1.36481	0.269468	1.34304	0.613891	0.935631
A_23_P130398	CTAGE1	chr18	q11.2	-0.619399	0.474128	0.243787	-0.496762	-0.0752032	-0.36567	-0.619399	-0.563627	-1.09599	0.265596	0.659753	0.164887	-1.28065	-1.82163	-0.404623	0.00289371	0.101024	-0.727814	-0.663355	-0.844461	0.0434737	-0.420306	-0.773371	0.600585	-1.24659	-1.94531	-1.80885	-0.728441	0.626609	-1.43151	-1.09275	0.978228	0.685692	0.168977	0.525616	0.134543	0.676016	0.196488	-0.484936	0.279622	0.855863	0.888938	3.58683	-0.365533	0.87636	0.181458
A_23_P330999	MED23	chr6	q23.2	-0.620715	0.236917	-0.119483	-0.583623	-0.620191	-1.11574	-1.27062	0.365236	-0.0714238	-0.101442	0.348698	-0.302819	-1.22477	-1.15054	-0.897382	-0.844129	-1.294	-0.620715	-0.454489	-1.69779	0.347065	-1.2685	-0.424175	0.285201	-0.725404	-1.33832	0.105795	-0.248877	0.558269	1.50184	1.96533	0.24514	0.489139	0.519095	2.69829	1.91373	1.09907	2.16711	2.38943	-0.101062	1.21881	1.49201	1.92663	2.08526	-1.3123	-0.0196427
A_23_P214529	ZNF192	chr6	p22.1	-0.623598	0.108865	0.0279795	-0.153843	-0.0687393	-0.825942	-0.623598	-0.93217	-0.701704	1.04177	0.221441	-0.908117	-1.68928	-1.90937	-1.11694	0.204442	-1.53827	-0.840449	-0.515206	-0.895371	-0.570697	-0.774158	-0.402093	-0.598484	-0.130019	-0.0770575	-0.357076	-0.296879	0.582869	-0.0662813	0.0263914	-0.00258278	0.504441	2.77672	3.54195	-0.855611	0.738722	0.829919	-0.062609	-0.303261	0.551135	0.91192	2.29459	0.906441	-0.513851	0.297759
A_23_P324754	KIAA1199	chr15	q25.1	-0.624451	0.169004	0.430006	-0.0952572	-0.496634	-1.49731	-0.261045	-0.497572	-0.759818	0.219352	-0.515496	-0.552047	-0.635977	0.435662	-1.12152	-0.463564	-0.839838	-0.568769	0.292278	-1.00054	-1.15405	-1.22089	-0.624451	-0.750528	-1.4344	-1.36961	-0.655445	-0.576851	0.189608	0.0479769	0.856694	-0.255535	-0.654054	-1.57728	-0.0200415	0.141344	2.53368	1.41538	-1.04636	-0.0659944	-0.368352	0.337708	0.1484	0.545412	1.28757	1.15611
A_23_P29769	WWTR1	chr3	q25.1	-0.625568	0.774491	-0.135291	-0.6934	-0.912349	-0.523292	-0.721732	-0.784623	-0.343391	-1.19474	-0.297878	-0.59244	-0.75624	-0.33736	-0.303673	-0.471788	-0.61871	-0.271905	-0.719664	-0.625568	-1.62912	-0.304182	0.00269164	-0.830528	-1.23775	-0.558799	-1.58613	-1.65649	1.91239	1.25838	1.42823	-0.547925	0.672977	-0.171971	2.35948	1.92052	0.918194	1.10266	0.856722	-0.0144541	1.4772	0.45773	-1.15102	0.747596	0.801385	1.41887
A_23_P35330	HIVEP3	chr1	p34.2	-0.625656	0.479483	-0.484371	-0.808723	-0.69695	-1.00762	-0.693467	0.614686	-0.191934	-0.751813	0.649444	0.16277	-0.0760664	-0.349117	-1.01713	-0.687563	-0.161934	0.33313	-0.868219	-0.607971	-0.406624	-0.621429	-0.625656	0.543251	-0.997009	-0.590177	-1.25551	-0.692615	1.76297	1.69169	2.31392	0.858185	0.301978	-0.451611	1.89562	1.1383	-0.503471	2.22082	-0.345107	-0.335557	2.56093	-0.826861	0.612787	-0.562128	-0.664529	1.74568
A_32_P34920	FOXD1	chr5	q13.2	-0.625916	0.643148	0.151289	-0.392424	-0.482867	-0.385009	-0.242085	-0.541494	-0.581747	-0.931999	0.151289	-0.564534	-0.110129	-0.625916	-1.1124	-0.85339	-0.561161	-0.880281	-0.145454	-1.01996	-1.31021	-1.81101	-1.67806	-1.56228	-0.513973	-1.24098	-0.883942	-0.977046	-0.620089	0.337247	-0.469325	1.07521	0.836506	0.424927	0.809406	0.813209	1.81987	0.733495	1.08338	0.79591	1.31929	2.38947	-1.63528	2.6937	0.613254	0.761412
A_23_P33444	SNTB2	chr16	q22.1	-0.631774	0.487705	-0.0316776	-0.564824	-0.620536	-0.40009	-1.61742	-1.41131	0.60047	-0.983538	-0.0259651	-0.984068	-0.428412	0.422291	-0.647933	-0.843628	-0.314509	-0.631774	-1.56252	-1.22401	-1.5276	-1.12452	-0.869923	-1.55249	-0.313721	-0.472969	-0.248998	0.739093	2.41851	0.885031	2.12685	-0.228149	0.430351	-0.31914	-0.313294	1.54414	0.802272	0.310108	1.02807	-0.643317	-0.0675779	2.14933	0.947986	-0.896767	0.917007	1.08972
A_23_P3193	GOLGA5	chr14	q32.12	-0.632315	0.579612	0.299438	0.366531	0.325236	-0.548453	-0.933033	-0.205505	0.406581	-0.632315	0.357878	-0.446201	-0.939843	-1.72171	-1.04767	0.298104	-1.76523	-0.990283	-0.406607	-0.167193	-2.18824	-1.27033	-1.0565	-0.687621	-1.19019	-1.71974	-0.22556	0.150602	-0.119234	0.593895	0.868739	-0.541261	-1.90091	-1.74717	1.6987	0.993577	0.858527	1.7301	-0.216152	-0.120828	1.01899	0.299438	2.33196	-0.312672	1.90751	1.66172
A_23_P76969	SIPA1L1	chr14	q24.2	-0.632652	0.934766	-0.110827	-0.116544	-0.430063	-0.197078	-0.910699	-0.852737	-0.111693	1.46253	-0.110827	-1.26088	0.882101	0.0858113	-0.836077	-0.926015	-0.632652	-0.396221	-1.52698	-0.372768	-0.515892	-1.24212	-1.58613	-0.340372	-1.2808	-0.587201	-1.38048	-0.704694	1.50198	1.21999	2.35783	-0.897165	-0.150933	-0.305409	1.65253	1.50277	-0.0319225	1.42097	-0.362999	-0.155981	1.48371	0.0107606	1.65723	0.0436261	2.40687	1.00383
A_23_P33093	ST6GALNAC5	chr1	p31.1	-0.635528	0.494517	-0.0743107	-0.751858	-0.0198362	-1.12061	-0.912335	-0.529691	-0.635528	-0.740623	-0.215311	-0.283028	-0.1469	-0.652941	-1.00651	-1.16013	-0.520275	-0.667654	-0.417576	-0.517441	-0.468388	-0.662444	-0.0362163	-0.740977	-0.757107	-0.433867	-0.745511	-0.487724	1.55845	2.17671	2.90556	-1.16905	0.617745	0.0450067	2.19203	0.344697	1.00676	1.35487	0.0586276	0.794009	-0.0743107	1.96497	1.74401	0.26417	-0.698827	1.52986
A_24_P212531	B3GALNT2	chr1	q42.3	-0.636274	0.556321	-0.158609	0.102139	-0.510602	-0.690816	-0.308315	-0.973256	-0.629394	0.389944	0.42889	-0.811316	-1.60587	-1.60442	-1.45303	-1.89783	-0.605501	-0.328223	-0.263438	-0.0225753	-0.636274	-0.869858	-2.10058	-0.354401	-0.671407	-0.924318	0.895687	-0.326153	-0.0162108	0.369647	0.657832	0.739871	0.722911	1.1619	1.74275	0.960801	0.609086	1.16444	1.41372	0.454811	0.625587	1.91792	1.40838	1.32157	0.304924	-0.0704337
A_23_P85164	DNASE1L1	chrX	q28	-0.6391	0.0963103	-0.02552	0.0200968	-1.94716	-0.6391	-0.715434	-0.529624	-1.02978	-0.466457	-0.761765	0.618285	0.190377	-0.778789	0.113374	-0.817631	-0.464232	0.285683	0.191439	-1.45677	-0.375885	-0.672853	-0.689278	-0.02552	-1.62782	-1.65978	-1.49863	-0.55751	-0.359554	-0.310667	0.100003	-0.251077	-0.247187	-0.0395057	-0.75065	1.23244	1.47145	-0.177275	1.55187	-0.294073	1.16705	-1.787	2.22418	1.91625	0.0135502	1.71972
A_23_P164258	PIPOX	chr17	q11.2	-0.640227	0.368586	0.362447	-0.275088	-0.379085	-0.0730254	-0.779639	-0.179231	-1.24617	-1.42968	-1.3204	-0.803941	-0.903726	-0.884219	-0.702107	-0.252572	-0.335705	-0.922052	-0.762618	-0.574624	-0.710292	-0.45876	-1.04707	-0.643342	-0.640227	-0.452383	-0.510559	-0.285496	0.222921	0.0315337	-0.300862	1.74832	0.868627	-0.168173	0.958987	1.11977	-0.00568295	-0.473883	-0.201691	1.40241	-0.328799	-0.44289	-1.18657	-0.832113	0.791472	2.17178
A_24_P673063	FABP5L3	chr7	q36.1	-0.640242	0.241439	0.229984	-1.37967	-1.28798	-0.265118	-1.32422	-0.438519	-0.301158	0.0507629	0.298942	0.0309603	-0.222135	-0.528732	-0.593414	-1.49814	-0.728417	-0.009041	-0.976912	-1.25229	-0.640242	-0.89628	-1.05133	-0.116874	-1.27264	-1.03113	0.265982	-0.206338	1.77631	1.34989	1.41	-0.64609	-1.70465	0.102677	-1.25357	1.04413	0.6498	0.175749	-1.20238	1.77187	0.551875	-0.683874	0.190223	-0.383883	2.45338	1.22122
A_23_P77731	CRYM	chr16	p12.2	-0.640418	0.236794	0.0116584	-0.65857	-0.700573	-0.803972	-0.660907	-1.0256	-1.01286	-0.902145	-0.952964	-0.908108	-0.0268713	-0.469746	-0.467728	-1.09526	-0.281097	-0.640418	-0.680917	-0.590366	-0.193094	-0.594143	-0.533507	0.875924	-0.600479	-0.862206	-0.153712	-0.624045	1.45336	1.31958	0.625066	1.7068	0.808116	1.57256	2.37066	0.552386	0.585628	0.267756	0.189982	1.33108	0.279056	0.487399	-0.208081	2.42154	-0.640466	-0.669326
A_24_P411863	MLL5	chr7	q22.3	-0.641075	0.352231	-0.155212	-0.333252	0.288246	-0.583112	-0.564423	-0.65072	-0.76308	0.13526	0.334167	-1.17405	-0.881735	-0.641075	-1.71726	-0.404103	-0.750777	-1.26659	-1.38601	-0.941497	-0.802542	-1.44782	-0.310978	-0.568299	-0.504377	-0.297733	-0.579609	-0.0382086	0.360081	-0.0279965	1.21739	-1.1005	1.36604	1.06554	1.71592	-0.415639	0.25138	2.40543	1.74591	0.0966031	-0.702124	0.621496	2.55535	-0.185581	0.97598	-1.79581
A_23_P56404	EN1	chr2	q14.2	-0.642223	0.513822	-0.655871	-0.772454	-0.14931	0.619952	-0.711657	-0.580484	-0.608371	-0.728311	-0.646991	1.09004	-0.621999	-0.640989	-0.741343	-0.651428	-0.642223	1.25836	-0.671273	-0.675555	-0.634667	-0.594532	-0.591776	-0.624307	-0.721594	-0.671736	-0.749702	-0.809158	0.359265	1.02427	0.532117	1.46586	-0.609811	-0.174787	-0.86513	-0.78196	-0.824377	1.52347	0.266674	2.48171	-0.387097	-0.616779	-0.481352	1.30988	2.57611	0.495527
A_24_P47988	ELL3	chr15	q15.3	-0.645011	0.164136	-0.144375	-0.683081	-0.569615	-0.237401	0.216808	-0.644874	-0.645011	-0.789264	-1.24149	-0.621875	-0.575356	-1.05907	-0.654191	-1.10446	-0.578256	-0.742952	-0.5376	-0.650769	-0.152111	-0.7051	-0.970846	-0.273758	-0.544155	-0.55263	-0.841363	-0.808663	0.234329	0.115923	0.316413	1.90585	1.38701	1.64736	-0.260621	0.23122	2.21597	-0.093918	0.243058	-0.244539	1.98055	-0.233487	5.32344	1.63401	0.599068	0.163957
A_32_P14187	TFAP2A	chr6	p24.3	-0.648403	0.342887	-0.393401	-0.825315	-0.670111	-0.648403	-0.704472	-0.700104	0.227379	-0.665672	-0.776133	-0.636715	-0.583108	-0.748188	-0.523029	-0.586325	-0.260287	-0.587012	-0.755445	-0.507736	-0.67126	-0.699355	-0.64967	0.125983	-0.699116	-0.53802	-0.64644	-0.627791	-0.107422	-0.734667	-0.694771	0.664068	2.7344	0.630041	1.84288	-0.354116	1.53267	1.66593	-0.330105	0.149744	-0.338945	3.77337	-0.663006	2.26581	0.547541	-0.770613
A_24_P162145	ARHGAP29	chr1	p22.1	-0.652878	-0.192834	0.264004	-0.396742	-0.323133	-0.938292	-0.0778022	-0.418709	-0.652878	-0.476422	2.02327	-0.420023	-0.116508	-0.933133	-1.14506	-0.992622	-1.40096	-0.112802	-0.172081	-0.751345	-1.25181	-1.35662	-1.64094	-0.161385	-0.900114	-1.32555	-0.41875	-0.422383	-0.242591	1.04699	1.24232	-0.784849	0.18116	-0.8047	1.50293	1.64225	-0.436467	-0.556541	1.39523	-0.927217	1.36833	1.5624	-1.36449	-0.122621	-0.408243	1.7096
A_23_P251412	SCGN	chr6	p22.2	-0.654844	0.244361	-0.399495	-0.509496	0.460707	-0.645831	-0.730253	-0.623583	-0.525432	-0.551225	-0.473329	-0.726341	-0.679289	-0.598536	-0.699632	-0.721895	-0.654844	-0.896754	-0.699391	-0.801168	-0.374383	-0.873084	-0.817653	1.12849	-0.417029	-0.669554	-0.540501	-0.416701	2.09185	3.18874	2.10312	0.32374	2.82543	2.77135	1.0881	1.34504	0.0933018	-0.408974	0.169204	0.164982	0.345325	-0.458944	-0.554098	-0.430731	-0.297097	-0.38698
A_23_P81581	BHMT	chr5	q14.1	-0.657418	-0.182033	0.0637011	-0.236941	-0.129738	-0.823123	-1.40546	-1.3732	0.130256	-0.532954	-0.723211	-0.982169	-1.35698	-0.840141	-0.63656	1.09696	-1.18878	-0.941223	-1.0573	-0.657418	-0.752856	-0.921618	-0.519674	-0.254156	-0.417061	-0.420854	-0.430704	-0.268039	-0.305106	-0.296706	-0.036286	0.574238	0.06191	-0.183833	-0.335988	-0.464431	1.5451	0.176349	0.379203	0.371439	-0.399622	0.968438	0.0716386	-0.205746	-0.34557	-0.218497
A_23_P250767	MTMR12	chr5	p13.3	-0.657651	0.555088	-0.208894	-0.526158	-0.326945	-0.971304	-0.657651	-1.32841	0.428813	-0.0497602	1.15966	-1.09014	-1.39124	-1.27172	-0.179862	-0.548412	-0.481105	-0.518101	-0.738561	-0.677958	-0.267303	-0.830599	-1.52799	1.23439	-0.733214	-0.299777	-0.225403	-0.735407	0.927958	0.921159	0.478119	-0.541617	1.14325	1.01215	1.72539	-0.372301	1.44994	2.12344	-0.631588	-1.26952	1.28325	1.1098	1.71727	2.31313	-0.115356	-0.528104
A_23_P318262	DLX5	chr7	q21.3	-0.65896	0.292232	-0.57055	-0.622614	-0.304753	-0.639332	-0.570089	0.496871	-0.668368	-0.701401	-0.655917	-0.635246	-0.650348	-0.697227	-0.676369	-0.65896	-0.697664	-0.685756	-0.619657	-0.732338	-0.664171	-0.683483	-0.629433	-0.782476	-0.767369	-0.736522	-0.626361	0.844689	2.0841	1.48784	1.52013	1.9197	2.12323	2.04889	-0.0686257	0.12138	2.09192	1.1878	0.956575	-0.63852	-0.613675	-0.262589	-0.620228	1.76782	-0.75625	-0.453878
A_24_P416346	ETV4	chr17	q21.31	-0.660242	0.0613682	0.539595	-0.340772	-0.660242	-0.838746	-0.396727	-0.414648	-0.391053	-0.714363	-0.399116	-0.429265	-0.297139	-0.461714	-1.38456	-0.818043	-0.294604	0.388191	-0.484525	0.558295	-1.1285	-1.27055	-1.24793	-0.813421	-1.11353	-1.26429	-1.32591	-0.933603	1.5102	1.81051	1.2712	0.0529011	-0.807178	-0.740472	1.48104	0.686333	-0.0389307	1.41001	0.293314	0.0698353	3.4989	0.738913	-1.15666	-0.406915	1.20399	0.0197565
A_23_P374695	TEK	chr9	p21.2	-0.662723	-0.199008	0.713106	-0.832852	-0.308758	-0.9149	-0.277944	-0.624251	-0.893334	-0.800583	-0.48693	-0.720156	-0.744085	-0.902176	-0.531988	-0.171893	0.121299	-0.192117	-0.253692	-0.662723	-0.792518	-0.91144	-0.984062	-0.368642	-0.488388	-0.407975	-0.0485522	-0.96665	-0.14034	0.443593	-0.257675	-0.0373454	-0.284932	-0.72711	-1.02533	-1.43634	0.737556	-1.03259	-1.38313	-0.762182	-0.0240008	-0.591805	-1.29258	-0.390919	-1.228	1.51114
A_24_P119391	NCOA6	chr20	q11.22	-0.665228	0.763361	-0.71634	-0.527755	0.429497	-0.906773	-0.402613	-0.977115	0.970701	-0.384936	-0.525868	-0.724092	-0.879642	0.494305	-0.732063	0.418623	-0.74501	-0.601682	-1.37825	0.789123	-1.17343	0.113583	-0.852738	-0.670108	-1.47674	-0.911944	0.482879	-0.665228	-0.418892	0.743166	1.08837	-0.759293	1.20152	1.25737	2.40995	1.21905	1.53331	0.783556	0.293397	0.827613	0.655024	-1.18479	1.6643	1.31089	2.45385	-0.475204
A_23_P75008	GAD2	chr10	p12.1	-0.6654	-0.0931695	-0.294669	-0.623104	-0.605641	-0.877226	-0.691723	-0.380077	-0.450968	-0.516673	-0.588896	-0.941876	-0.6654	-0.834498	-0.917874	-0.898694	-0.898351	-0.632476	-0.998811	-0.778885	-0.923782	-0.38495	-0.918136	0.456357	-0.66507	-0.600787	-0.610462	-0.634831	2.35568	2.28956	1.60853	2.15841	1.18568	1.2054	-0.302662	-0.413999	1.45061	-0.38106	-0.477669	0.776915	-0.508264	0.369396	0.0636411	-0.63607	-0.591796	-0.630289
A_23_P138957	SIK2	chr11	q23.1	-0.666967	0.717278	0.120195	-0.712928	-0.306808	-0.870668	-0.617835	-0.245815	-0.167423	-0.254237	1.96729	1.12978	-0.666967	-1.62905	-0.811937	-0.291908	-1.6895	-1.14937	-1.04547	-1.08292	-0.790511	-0.0517324	-0.456147	0.690287	-0.308405	0.118543	-1.34981	-1.47236	1.7701	0.84432	0.175164	-0.452846	-0.0881985	1.06008	0.540132	0.0349952	-0.257014	1.42878	0.432448	-0.730775	-0.0432323	2.93865	0.854357	-2.06397	0.757975	1.16199
A_24_P276531	SNIP1	chr1	p34.3	-0.670684	0.473695	-0.00847407	-0.666275	-0.111285	-1.12702	-0.344974	-0.893254	1.30064	0.40267	0.118115	-0.0406114	-2.17326	-1.9074	-0.411136	-0.0196975	-1.96821	-1.24062	-0.365676	-0.921849	-0.770197	-0.670684	0.181105	-0.352514	-0.31719	-0.836788	-1.61046	-0.788416	0.255371	-0.117456	0.625863	-0.249643	0.563319	0.981652	2.47379	0.894306	1.28902	1.56755	2.89568	-0.35369	1.03482	0.183956	1.46669	1.60113	-0.511326	0.420322
A_23_P68624	POFUT1	chr20	q11.21	-0.672353	0.512833	-0.0733351	-0.681751	-0.436853	-0.695623	-0.672353	-2.42201	-0.160954	-0.679472	-0.0733351	-0.125886	-0.868247	0.00527517	-0.677846	-0.700548	-1.07161	-0.500482	-0.652524	-0.828894	-0.890952	-1.9439	-0.50969	-0.495366	0.898237	-0.245954	0.51015	-0.588477	1.24958	1.47414	0.242173	1.23811	-0.290415	0.160072	2.09029	0.0984517	-0.0409739	0.96329	-0.00746548	0.00561943	-0.283895	-0.472093	0.19669	1.63171	0.112624	1.39998
A_23_P13102	CASP12	chr11	q22.3	-0.6741	0.0670467	0.17719	-0.162172	0.304093	-0.839408	-0.602943	0.142188	-0.769175	-0.337781	0.604437	-1.02929	-1.00435	-2.02388	-1.20578	-0.323974	-1.08304	-0.589407	-0.652885	-1.52117	-1.85677	-2.02426	-1.63156	0.17719	-0.346308	-0.6741	0.17531	0.745772	-0.633698	0.653822	0.270184	0.293715	-0.59452	0.190572	-0.170231	-0.349995	-0.479944	-0.560491	-0.30222	-0.496757	-0.122035	1.34337	-0.0713922	-0.577188	-0.643318	2.54135
A_23_P133284	RIOK2	chr5	q15	-0.675517	0.198126	0.0730283	-0.658223	-0.662791	-0.551612	-1.00211	-1.29049	-0.853655	-0.633797	-0.894833	-0.132257	-0.793033	-1.03502	-1.14284	-0.863945	-0.82819	-0.635597	-1.36553	-1.35784	0.907667	-0.174727	-0.501356	0.0730283	-0.393111	0.03902	-0.675517	-0.757808	-0.785911	-0.563361	-0.683257	2.82861	-0.757204	-0.65961	-0.381676	2.93209	-0.0750842	0.515278	0.72346	1.12336	-0.144937	-0.00738691	2.9193	-0.0864984	-0.736219	0.592569
A_23_P19030	ARSI	chr5	q32	-0.678326	0.126766	-0.0831378	-0.435683	-0.967094	-0.963417	-0.826289	-0.819723	-0.863668	-0.463792	-0.8783	-0.791702	-0.991501	-0.811328	-0.636338	-0.793208	-0.251264	-0.298584	-0.81772	-0.541101	-0.20929	-0.399081	-0.687333	-0.609824	-0.678326	-0.429208	-0.620428	-0.543672	2.82359	0.750871	1.85736	-0.73611	-0.123754	0.162653	0.0473774	-0.142986	-0.318909	0.0548151	0.0508861	0.248686	1.02628	0.431566	-0.517834	1.48608	3.2938	3.58582
A_23_P156355	TMEM161B	chr5	q14.3	-0.67888	0.128771	-0.0424363	-0.948163	-0.739291	-0.752686	-0.920278	-0.964749	-0.122992	-0.656148	-0.376169	-0.67888	-1.43957	-1.29469	-0.0858405	-0.61794	-0.438426	-1.36529	-0.319186	-0.274626	-0.725214	-0.606293	-1.16806	1.13012	-0.249385	-0.663937	-0.264441	-0.820522	-0.336185	0.333221	0.718086	1.16011	1.17085	0.670639	-0.125601	1.32085	2.17083	-0.821919	3.30429	-0.652651	1.73204	0.721183	2.38779	1.22446	0.546428	-0.464937
A_23_P207089	SHBG	chr17	p13.1	-0.680425	0.411497	-0.226304	-0.339328	-0.680425	-0.797597	-1.71686	-0.52733	-0.723415	-0.63285	-0.674945	-0.17627	-1.34455	-0.975067	-0.525604	0.113689	-1.37439	-1.13948	-1.29712	-1.09017	-0.0936821	0.850737	-0.97378	0.886522	-0.880336	-0.210931	-0.407851	-0.37909	0.0572059	0.370584	0.339936	4.30471	0.408453	-0.286701	1.80598	-0.184224	-0.190751	1.07448	-0.226304	-1.03904	0.602606	-0.577463	0.278498	-0.29079	0.971125	0.715681
A_23_P36140	B3GAT3	chr11	q12.3	-0.681213	0.532813	-0.129385	-0.362321	-1.75611	-0.692475	-1.44953	-0.000960903	0.000330717	-0.616764	-2.33255	0.539787	0.515188	-0.681213	0.538203	-1.87798	-1.70721	-0.838928	0.422793	-0.709141	-0.344644	-0.86336	-0.909014	1.22316	-0.529171	0.225811	-1.13326	-0.769305	1.74713	1.27181	1.04272	0.543255	-0.0270103	0.522371	-1.56148	-0.899976	-0.601033	0.480712	-0.473865	1.21332	-1.87342	0.982508	1.67344	1.08484	0.454571	0.654399
A_23_P111240	PHACTR2	chr6	q24.2	-0.68188	0.311881	0.202947	-0.68188	-0.28998	-0.976296	-0.392164	-0.221209	-0.697597	-1.11043	0.527744	-0.729739	-0.393929	-1.10628	-0.140029	-1.16857	-1.08784	-0.689411	-0.176284	-1.53925	-0.966781	-0.157936	0.070748	-1.70861	-0.658532	-0.19291	-1.10792	-0.637	-0.855806	1.99852	0.0722071	1.83226	-1.07923	-0.506601	-0.377482	0.618944	1.34902	1.32539	-0.504066	-0.642172	-0.304989	1.33749	1.668	2.12691	-0.777726	0.116962
A_23_P79217	LCT	chr2	q21.3	-0.681984	0.320422	-0.0511143	-0.167807	-0.21681	-1.05469	-2.17182	-0.681984	-1.47191	-0.0264634	1.58771	-1.47338	-0.677573	-0.445581	-1.79219	-0.766014	-1.64282	-1.33339	-0.529393	-0.921805	-0.516716	-1.06295	-0.0661398	1.23203	-1.26045	-0.127016	-0.00549281	0.153561	1.37971	-0.42063	-0.711325	0.761073	0.459497	1.05285	0.662677	4.2744	-0.730663	1.6546	0.558838	0.782002	-0.454726	0.707388	2.1436	0.265604	-0.160814	0.0233131
A_23_P331560	SLC26A4	chr7	q22.3	-0.682698	0.256018	-0.313454	-0.286635	-0.63747	-1.00597	-0.682698	-0.748216	-0.0671627	-0.259905	-0.184966	-0.616272	-0.738415	-0.672665	-0.522985	-0.597158	-0.4362	-0.9106	-0.925299	-1.05871	-0.692239	-0.561564	-0.667423	-0.722002	-0.765893	-0.736608	-0.774762	-0.817164	0.238158	2.34233	1.69335	0.055988	-0.444543	-0.219894	0.273879	0.53934	-0.638324	0.875451	-0.363582	0.577282	-0.167207	0.462055	-0.647949	-0.266458	-0.713575	0.580744
A_23_P104471	DUSP13	chr10	q22.2	-0.686888	0.547361	-0.430897	-0.578407	-1.07608	0.683293	-0.874388	-1.1459	-0.277697	-0.527235	-0.483309	0.0926004	-1.21042	-1.26723	-0.861837	-0.457247	-0.499713	-0.762958	-0.686888	0.127162	-0.944322	-0.801324	-0.864204	-0.990816	-0.260963	0.890315	-0.303153	-0.886791	-0.433117	-0.499024	-0.371543	2.49924	1.71965	1.1436	-0.56827	1.65837	-0.23651	0.527123	-0.563463	1.91928	-0.430897	-0.205259	-0.632242	1.23923	-0.313988	-0.373529
A_23_P209146	ZNF91	chr19	p12	-0.689513	0.363324	0.0368378	-0.75886	-0.689513	-0.978124	-0.789812	-1.90919	-0.93413	-1.258	-0.494223	-1.38712	-1.57089	0.38831	-0.746976	0.485163	-1.91592	-0.613941	-0.655118	-0.547559	-1.29146	-0.547958	0.172791	-0.369895	0.235434	-0.0772846	-0.253325	-0.239774	0.21594	0.843463	-0.015257	0.213112	0.461206	1.00384	1.19842	-0.271335	2.79675	0.026435	0.104309	-1.04184	1.5905	0.919423	-1.23295	-1.29639	1.78224	0.277551
A_23_P207221	SLC47A1	chr17	p11.2	-0.690359	0.487326	-0.256416	-0.701185	-0.484165	-1.35323	-0.227295	-0.840784	-1.07631	0.136704	-0.256416	-1.18155	-0.690359	-0.743838	-0.31316	0.177916	0.17382	0.457638	-0.402415	-1.02843	0.475193	-1.37426	-1.55106	-0.470285	-1.25404	-1.20473	-0.617307	-0.628743	1.12922	1.53911	0.810285	1.63748	1.98472	1.77973	0.415456	0.559196	2.16129	0.364382	1.24404	1.83841	1.77509	1.63691	2.65681	0.67316	-0.290857	-0.219671
A_23_P171150	KLHL4	chrX	q21.31	-0.690936	0.435537	0.194286	-0.389445	-1.14781	-1.39151	-0.529346	-1.0427	0.671789	-0.752131	-0.958314	0.0343026	-1.25782	-0.413857	0.0651939	-0.304399	-0.737015	-0.415849	-1.05444	-0.923214	-0.690936	-0.91334	-0.412595	0.182272	-0.881897	-0.529195	-0.57738	-0.954097	-0.220294	-0.483465	0.731735	0.238526	-1.0832	0.632114	-0.940789	0.181423	-1.01678	1.21929	-1.26201	-0.303546	-0.832818	-0.870212	-1.25441	-0.152536	1.04024	2.04928
A_24_P919279	ZNF790	chr19	q13.12	-0.690948	0.696743	-0.187577	-0.930426	-0.796984	-0.865118	-1.44469	-0.483101	0.155206	-1.08762	-0.270886	1.68605	-0.400906	0.0733733	-0.0511369	-0.690948	-1.69597	-0.820008	-0.595991	-0.45535	-2.57688	-0.586752	-0.48783	-1.31697	-0.759371	-1.34961	-0.0178272	-1.43261	0.326915	0.133778	0.547814	1.55592	1.20929	1.40424	0.95333	1.61724	-0.637015	-0.264973	-0.144441	-0.859625	-0.187577	-0.565998	0.845671	0.258415	0.270184	0.971293
A_23_P214969	CITED2	chr6	q24.1	-0.692705	0.379997	0.089212	-1.37918	-0.286794	-1.26399	-1.38309	0.007524	-0.592014	-0.0356934	0.459525	0.385278	-1.72514	-0.859255	-0.529775	-1.06312	-1.0581	-0.619213	-0.692705	-1.42777	0.296632	-0.843393	0.0154739	0.089212	-0.857572	-1.30554	-0.451261	-0.269936	0.372298	-0.152536	-0.145969	1.13707	2.35788	1.62527	0.899969	0.232513	0.63675	0.719057	-0.175168	-0.516467	-1.42992	1.14212	1.04023	0.594401	-1.21451	-1.09234
A_23_P250164	HGD	chr3	q13.33	-0.694775	0.0501787	-0.154638	0.0876925	-0.694775	-0.59734	-0.764093	-1.05642	0.366191	-0.306283	-0.251786	-0.80566	-1.04246	-0.702558	-1.2791	-0.46147	-0.383489	-0.324923	-1.01791	-0.805811	-1.12913	-1.03877	-1.00621	-0.344689	-0.412407	0.201985	-0.162925	-0.113171	-0.0976929	-0.391174	-0.219558	-0.202195	-0.0297933	0.72538	1.40724	1.15513	1.07998	0.182139	1.01731	-0.270399	0.112961	-0.481441	0.492336	1.13225	-0.33798	0.412544
A_23_P97394	BCAR3	chr1	p22.1	-0.695467	0.558273	-0.246638	-0.325656	-0.804358	-0.695467	-0.867259	-0.774217	-0.47501	-0.981321	-1.15599	-0.0251065	-0.887529	-0.545137	-0.753133	-0.63733	-0.375151	0.0513161	-1.0898	-1.18591	0.408037	-0.512229	-0.671139	-0.344826	-0.703531	-0.451759	-1.06296	-0.860813	2.30035	2.35831	2.26588	1.93979	0.961732	0.825379	2.4901	0.615685	0.0705703	1.87174	0.314417	0.598789	2.11515	1.51816	-0.770961	0.799567	0.157256	0.617424
A_23_P23834	LGR6	chr1	q32.1	-0.696331	-0.270757	0.372264	-0.214237	-0.400442	-0.935983	-0.696331	-1.03851	-0.241483	-0.127556	0.309352	-0.558758	-0.823563	-0.760508	-0.962519	-0.803987	-0.850881	-0.424478	-0.685433	-0.815376	0.87091	-0.762948	-0.861801	-0.47898	-0.657703	-0.676458	-0.337971	-0.696478	1.12071	-0.280912	0.349477	-0.475979	-0.699941	-0.0831231	-0.0166607	-0.422545	-0.387105	-0.259949	-0.45189	1.46294	-0.603466	-0.479477	-0.789979	-0.270072	-0.595618	-0.736183
A_23_P421493	HPR	chr16	q22.2	-0.701929	-0.48333	0.821641	-0.786831	-0.654392	-0.701929	-1.22794	-0.910855	-0.246787	0.0922393	1.82935	2.51678	1.2742	0.407394	-0.245177	-0.936506	-1.10091	-0.0935063	-1.01142	0.251646	-0.162332	-0.722427	-0.76898	0.80745	-0.818256	-0.560243	-0.848069	-0.838472	-0.841357	-1.0248	-1.0071	-0.508854	-0.739499	0.0408122	-0.387154	-0.332701	-0.506481	-0.466334	1.64497	0.75016	-1.02934	-0.378802	-0.732439	-0.946835	-1.10662	-0.692912
A_32_P111678	C14orf23	chr14	q12	-0.705122	0.338089	-0.329635	-0.732603	-0.532984	-0.705122	-0.483861	-0.478546	-0.495524	-0.517986	-0.375286	-0.947649	-0.788083	-0.778313	-0.595012	-0.740301	-0.92463	-0.792134	-0.928835	-0.886088	-0.778966	-0.710739	-0.689947	-0.473406	-0.522485	-0.409497	-0.591247	-0.466584	2.24856	3.42882	2.53562	0.454356	2.1804	0.75644	2.24952	1.21008	3.74903	0.440606	-0.198515	-0.0206143	-0.311445	-0.698729	-0.456818	-0.689265	-0.453014	0.754338
A_23_P80718	SYNPR	chr3	p14.2	-0.705943	0.213559	-0.341687	-0.818164	-0.802323	-0.605461	-0.882361	-0.694313	-0.689845	-0.698537	-0.691421	-0.67684	-0.569136	-0.787403	-0.758915	-0.956008	-0.633555	-0.721434	-0.705943	-0.839346	-0.538407	-0.556342	-0.638357	0.905248	-0.843828	-0.753659	-0.747277	-0.647309	2.30564	2.07735	1.93222	1.53469	0.907938	0.682629	1.39166	0.194704	-0.132634	-0.219952	-0.704313	0.971018	-0.352683	0.448744	0.114714	-0.860748	-0.173948	-0.784689
A_24_P126262	BAGE2	chr21	p11.1	-0.706468	0.341083	0.338191	0.339507	-0.449027	-0.892058	-1.16974	-0.706468	-0.33029	-0.634458	-0.924153	-1.28344	-1.21122	-1.14803	-0.933605	-0.0042308	-1.21018	-1.06425	-1.12799	-0.704512	-1.06028	-1.36781	-0.432747	-0.21601	-0.587548	0.0623804	0.825541	-0.044776	-0.630653	1.87553	1.12918	-0.489458	0.996136	0.576983	1.53786	-1.52547	2.4078	0.885946	0.586351	-1.26276	0.398609	-0.230791	1.49797	0.304767	-0.13696	1.18662
A_23_P32233	KLF4	chr9	q31.2	-0.707769	-0.182827	0.490879	-1.2241	-0.877343	-1.13967	-0.334535	-0.741309	-1.02428	0.310282	0.916631	0.642143	-1.15712	-0.954807	-0.2958	-0.0203077	0.0856078	-0.0704135	-0.707769	-0.874285	-0.07426	-0.425545	-0.964276	1.04123	-1.01096	-0.981307	-0.286914	-0.40156	-0.13672	-0.196882	-0.177583	-0.677742	-1.31307	-0.56047	-0.844229	2.28731	-0.712942	0.435447	0.349151	-0.443235	0.307126	3.84592	-1.25048	-0.309962	-0.430686	0.589264
A_23_P66739	SLC13A5	chr17	p13.1	-0.707922	0.0197329	0.0187791	-0.860505	-0.712846	-1.07187	-1.31289	-0.309542	-0.096984	-0.900598	-0.220059	-0.707922	-1.17744	-0.905258	-0.838507	-0.987494	-0.935645	-0.439253	-0.576487	0.464598	-0.608818	-0.570434	-0.522541	-0.319809	-0.705378	-0.724815	-0.218823	-0.289701	0.274099	-0.465231	0.317641	-0.624145	-0.763399	-0.819474	1.41794	0.897489	-0.810357	-0.699564	-0.769624	0.230641	-0.734466	0.274802	-0.533498	0.47603	3.44824	-0.619659
A_23_P319617	CHST7	chrX	p11.23	-0.709585	0.0186372	0.830661	-0.120866	-0.769458	-0.613093	-1.16286	-0.635842	0.123153	-0.922889	-0.433331	0.305443	-0.234077	0.0651161	-1.1674	0.187002	-0.682241	-0.719114	-0.646485	-0.248233	-1.03146	-0.748378	-1.69563	-0.549733	-0.709585	-0.968467	-1.42059	-0.735865	1.11159	1.60756	1.17498	1.10882	0.00371274	-0.784555	-0.534335	0.869059	-1.34705	0.0197633	-0.854124	-0.706524	1.39934	1.1333	-1.65459	-2.06499	-0.770041	1.47828
A_24_P124349	PDGFD	chr11	q22.3	-0.710312	0.510052	-0.0886323	0.174426	0.657432	-0.537293	-0.710312	-0.414561	-1.31952	-0.382182	-0.336823	-0.228234	-1.34233	-1.49386	-1.557	-1.64802	-0.975211	-0.99233	0.380735	-0.775585	-0.0921813	-0.859657	-0.0723721	0.48274	-0.838574	-0.82647	-0.292505	-0.15164	2.66032	2.81605	2.21314	1.40339	0.24932	1.65395	0.08287	0.32868	0.230828	1.52818	-1.20306	-0.353881	-0.0684063	-0.471893	0.825123	-0.977615	-1.19528	1.56715
A_23_P21002	ADCY1	chr7	p12.3	-0.712576	0.298497	0.225291	-0.33215	-0.202181	-1.21808	-0.361353	-1.84272	0.453832	0.428226	-0.226717	-1.40135	-0.615676	-1.22006	-1.22191	-1.31879	-0.48635	-1.29912	-0.817894	-0.467136	-0.581374	-1.47819	0.24252	-0.500763	-0.417201	-1.04089	-0.712576	-1.15853	0.205231	0.564169	1.11705	-0.433622	0.486289	1.12197	0.557258	-0.816427	-0.559825	0.270435	0.669766	0.0858075	0.991062	-0.602289	-0.158711	-0.248803	-0.254455	-0.178646
A_23_P61508	CHRNA9	chr4	p14	-0.714546	0.261536	-0.379563	-0.818392	-0.814098	-0.653844	-0.411771	1.06548	0.71677	-0.684098	-0.177689	0.290039	0.351604	0.164205	-0.751766	-0.542164	-0.718119	-0.3288	-0.714546	-0.71518	-0.64928	-0.726369	-0.734955	-0.729195	-0.765803	-0.733906	-0.877982	-0.72876	0.467339	-0.553114	-0.0201897	1.75888	1.73322	0.712391	3.06978	0.518922	0.458802	1.1802	-0.198858	-0.620281	-0.275232	-0.817321	-0.795008	0.910667	-0.137898	2.57705
A_23_P384405	EXTL3	chr8	p21.1	-0.719491	0.190781	0.0951978	-0.307172	-0.458515	-0.934841	-0.85794	-0.828775	0.454675	-0.57122	-0.478692	-1.15571	-0.801442	-0.813622	-0.859007	-0.749419	-0.753138	0.814815	-0.821401	-0.719491	-1.55308	-0.471583	-0.246434	-0.747222	-0.632828	-0.265684	-0.615308	-0.53134	3.91844	3.0388	2.88699	0.387524	1.15172	-0.267134	2.39037	0.163623	-0.555595	-0.435524	-0.79651	-0.421421	-0.10769	0.256839	-1.08627	-1.0406	1.08512	1.1277
A_23_P209360	KLHL29	chr2	p24.1	-0.719804	0.589845	0.326875	-0.198547	-1.30915	-1.55355	-0.837074	-1.27181	0.123969	-0.266568	-1.11619	-0.891342	0.733394	0.00602536	-0.339945	-0.619901	-0.719804	0.0318031	-0.76685	-1.10086	-0.388188	-1.94334	-1.03225	-0.629403	-0.38407	-0.975493	-0.452745	-0.89637	1.39362	1.10572	1.50214	-0.54223	0.102408	-0.966091	0.798898	0.331995	0.0587095	0.750058	-0.727909	-0.483545	-0.889588	1.91296	1.07815	0.227571	1.24356	-0.462211
A_23_P52323	COL17A1	chr10	q24.33	-0.721508	-0.174438	-0.0643325	-0.391298	-0.501918	-0.693666	-0.994201	-1.17985	-0.256095	0.266946	2.13341	-0.462847	-0.94847	-1.10537	-1.21804	-1.11399	-0.788665	-0.948995	-0.991375	-1.22243	-0.271599	-0.918595	-0.614508	-0.48952	-0.119808	0.140038	-0.607417	-0.721508	-0.436542	-0.3947	-0.357432	0.820809	-0.400821	-0.182586	1.09843	-0.380536	-0.196881	-0.280395	0.46066	1.59304	3.73796	0.595108	3.07246	-0.279086	2.37018	-0.16629
A_23_P167818	FAM184A	chr6	q22.31	-0.723981	0.308474	0.346848	-2.50208	-0.72182	-0.46484	-1.07166	-1.55223	-0.796362	-0.377259	-0.998069	-1.43889	-0.953881	-0.367943	-0.804473	0.507555	-0.160969	-0.723981	-0.907985	-1.36805	-0.893273	-0.385103	-0.647095	-0.20768	-0.211786	0.290644	0.557135	-0.889208	0.187312	-0.932208	0.852846	-0.729259	0.918379	-1.01294	2.10838	1.45833	1.73572	-0.670044	-0.382501	-1.19336	-0.890439	-0.308276	1.43168	0.709238	-1.61341	0.29892
A_24_P315535	SPRED2	chr2	p14	-0.724657	0.356	0.372836	-0.782822	-0.199912	-1.04914	-0.724657	0.438502	-0.0012523	0.466402	0.857728	-0.662803	-0.702221	-0.761541	-1.45313	0.0872673	-0.712096	0.0381831	-0.805887	0.333962	-1.07818	-0.992397	-0.648545	-0.150513	-1.40206	-1.544	-1.78212	-1.13598	1.94167	0.791096	0.94147	0.779943	-0.642292	-1.19832	1.91279	0.353874	-0.788103	1.32512	-0.659421	0.741312	1.94876	0.741396	-1.64632	-0.235657	0.470085	1.59994
A_23_P71073	TWIST1	chr7	p21.1	-0.725369	0.0708919	0.0112849	-0.540412	-0.452281	-1.1907	-0.503245	-0.683624	-0.50847	-0.416171	1.2806	-0.235291	-0.166216	-0.667095	-0.935061	-0.769637	-0.505283	-0.725723	-0.945452	-1.0871	-1.25033	-0.908973	-0.802732	-1.12896	-0.61384	-0.743376	-0.805148	-0.725369	0.0100676	-0.04713	-1.0117	1.41414	-0.666702	-0.487124	2.33663	0.408911	0.459813	2.33701	1.70051	1.2863	1.4618	1.75568	3.43991	3.00335	0.122895	0.715656
A_23_P17173	TRIM43	chr2	q11.1	-0.72781	0.105373	0.0930184	-0.276608	-0.276452	-1.09193	-0.308945	-2.62507	0.0135197	-0.0928869	-0.345928	-0.736522	0.238265	-0.865003	-1.17132	-0.454067	-0.858736	-1.64885	-1.13338	-1.33524	-0.805372	-0.72781	-1.26947	0.0930184	0.0583617	0.21063	-0.0959103	-0.372083	-0.107324	0.560065	0.343846	-0.415297	0.0177511	-0.172286	0.106852	0.00268765	-0.622084	1.22987	0.0323086	0.363834	5.9265	2.81297	-0.0795984	0.24902	-0.0481847	-0.12564
A_23_P387031	COL23A1	chr5	q35.3	-0.735867	0.536057	0.107987	-0.330539	-0.918838	-0.409201	-0.546955	0.398335	-0.532432	-0.706749	0.0262233	0.544726	-0.290792	-0.940043	-1.1672	-0.782958	-1.00988	-0.518842	-0.799379	-0.799398	0.101786	-1.16672	-0.735867	0.311922	-0.418241	-0.889358	-1.17521	-1.05013	1.75297	1.9418	1.76035	-0.516209	-1.12993	-0.489742	1.74156	1.63889	-0.596374	-0.251148	-0.0817205	-0.747172	-0.299267	0.515213	-1.11456	2.70898	0.641405	2.04499
A_23_P258093	AGPAT1	chr6	p21.32	-0.737125	0.519212	0.31437	0.0265946	-0.232196	-1.7519	-1.8251	-0.849375	-0.350418	-0.820169	-0.681443	-1.79773	-0.868208	0.680988	0.240394	-1.37574	-1.7571	-0.990666	-0.394042	0.19986	-0.999779	-0.737125	-1.54335	-0.639948	-0.0287405	-0.237083	-0.23741	-0.520272	1.07533	0.155496	0.571361	0.424358	2.1179	0.990782	1.19511	-0.338115	1.55158	0.75073	-1.67349	-1.49931	-0.80224	0.31437	1.18077	-0.611538	-1.06931	0.802081
A_23_P375922	COL19A1	chr6	q13	-0.737314	-0.231373	0.367109	-0.287004	-0.291755	-0.737314	-1.05351	-0.628656	2.06114	-0.440058	-0.157323	-1.02896	0.592063	-0.420543	-0.483107	-1.03919	-0.904648	-1.04342	-1.22144	-1.11126	-1.27844	-1.38339	-1.22342	0.524508	-0.164276	0.342665	-0.751015	-0.579577	-0.486285	-0.536148	-0.180693	-0.418072	-0.423216	-0.183668	0.434598	-0.279078	-0.59274	0.344223	-0.520707	-0.703146	-0.230374	-0.48737	-0.496987	-0.0493662	-0.359018	-0.286725
A_23_P60742	MYLPF	chr16	p11.2	-0.73982	0.404736	-0.164721	0.227435	-0.662054	-0.324329	-0.852424	-1.22592	-0.476237	-1.19309	-0.659071	-0.73982	-0.826989	-1.61407	-0.648327	-0.462595	-0.81417	-1.93165	1.1338	-1.09256	-0.182694	-0.880916	-1.04062	-0.125693	0.201046	-0.949601	0.00661775	-0.167127	-0.885005	0.346665	0.17827	-0.618306	-0.256408	-1.06228	0.602132	1.20793	-0.767219	0.968876	1.20365	1.30534	0.372367	-0.625371	-0.0980446	0.82754	1.23974	1.37324
A_23_P253911	CHRNA3	chr15	q25.1	-0.740281	0.102691	-0.17661	-0.388412	-0.118717	-1.14209	-0.79797	-0.820829	-0.695152	-0.162489	-0.460326	-0.112897	-0.788504	-0.533317	-0.681856	-0.969697	-0.907296	-0.924894	-0.740281	-0.829235	-0.787011	-1.19619	-1.18282	1.1664	-0.504642	-0.712576	-0.283301	-0.390458	0.441989	1.65102	0.679435	-0.533335	1.48439	-0.667016	-0.533344	-0.134009	-0.406534	3.17948	-0.0683811	-0.35851	-0.524221	3.78333	-0.389474	-0.085105	-0.225548	-0.5285
A_23_P313278	MUC3B	chr7	q22.1	-0.740583	0.652715	0.0892751	0.381628	-1.09284	-0.572489	-0.369566	-1.58553	0.0878801	-0.348396	0.00443084	-1.55742	-0.942936	-1.53407	-0.356791	-2.51026	-0.501046	-2.58152	-0.740583	-1.32705	-0.461816	-1.54047	-0.743188	-1.20068	0.879895	-0.94577	0.808987	-0.336471	2.66101	0.295352	0.995475	0.363014	0.0341066	-0.0383242	0.915589	1.1409	0.603552	0.703065	0.665039	0.065132	0.00695496	1.20194	0.461285	1.64009	1.79887	1.62652
A_24_P23445	RNU12	chrX	p11.23	-0.742588	0.546712	-0.303314	-0.261098	-0.508566	-1.19089	-1.38771	-1.18857	-1.04945	-1.0487	-1.41029	-0.802723	-0.742588	-0.456504	-0.501835	-0.836119	-0.948664	-0.988701	-0.804508	-0.386427	-0.301139	-0.567157	-0.654626	0.89868	-0.0187806	0.948494	0.479214	-0.852798	1.21642	0.469503	0.0827181	0.798582	0.131424	-0.997999	0.623921	-0.150194	-0.517626	0.811887	1.26825	3.50384	-1.41206	0.585021	1.01346	2.05566	0.70154	1.21648
A_23_P201636	LAMC2	chr1	q25.3	-0.742761	0.459676	0.128188	-0.10219	-1.00803	-0.526604	-0.174048	0.5746	0.708772	0.32551	-0.402786	-1.16593	-0.742761	-0.874263	-1.0918	-2.06137	-1.34121	-1.90218	0.728301	-1.4161	-1.15546	-2.06863	-2.22931	0.133401	0.0288431	-0.729238	-0.46882	-0.684906	-0.619026	-0.831098	-0.236376	-0.00695178	0.646579	-0.356167	1.63911	2.53526	1.09964	-0.212351	1.04601	-0.831059	1.91228	-1.07748	1.25544	1.40306	1.23281	0.890303
A_23_P127484	CCDC87	chr11	q13.2	-0.746664	0.404922	-0.0260251	-0.769119	-0.860473	-0.947287	-0.29015	-0.521334	-1.0977	-0.746664	-1.40849	-0.444739	-1.47865	-2.0115	-0.632414	-0.291695	-1.69944	-0.96802	-0.238348	-1.02821	-0.455044	1.29909	-0.236389	0.161496	-0.81547	-1.03142	-0.0182795	-0.704861	-0.236439	0.145008	0.195189	1.79381	0.597792	1.15124	0.453106	-0.227492	-0.0159037	2.83965	2.42257	-0.0195019	-0.564421	-1.49359	-0.107413	-0.640211	-0.0432367	0.947357
A_23_P403466	DLX1	chr2	q31.1	-0.746811	0.580438	-0.574177	-0.412407	-0.686794	-0.786604	-0.742195	-0.580739	-0.485289	-0.559407	-0.804107	-0.890828	-0.83064	-0.614312	-0.719024	-0.746811	-0.548605	-0.968206	-0.794594	-0.929501	-0.836595	-0.907367	-0.774621	-0.853033	-0.899909	-0.771211	-0.597134	-0.390257	1.82004	1.76306	1.76179	1.64675	2.04476	1.92574	1.73322	1.00806	1.91127	1.45596	1.28653	0.43501	0.823563	1.23986	-0.778625	-0.455633	-0.818845	-0.331078
A_24_P224526	C17orf75	chr17	q11.2	-0.747949	0.276603	0.426765	-1.79778	-1.03086	-0.48938	-2.09555	-1.01389	0.20077	-0.964677	-0.869301	-0.412962	-1.12079	-1.19885	-0.564175	-0.897493	-0.965407	-0.644648	0.0905245	0.0531187	-1.42366	-0.131349	-2.17189	-0.308875	-0.147185	0.285158	1.23435	-0.747949	-0.507231	0.189802	1.05477	-0.440677	-0.288931	0.287334	2.71221	0.886249	2.84254	0.705553	1.14052	0.21844	1.50342	0.512888	1.74998	1.50204	1.6661	-0.447154
A_32_P223859	SMPDL3A	chr6	q22.31	-0.748185	0.376815	-0.0161758	-1.35875	-0.997722	-0.59142	-0.398747	-0.435245	0.384707	0.402019	-0.120203	1.05154	-0.950601	-0.980342	-1.03356	-0.16937	-0.603428	-0.0172334	-0.606908	-1.65205	0.295779	-1.44091	-1.35088	0.0619663	-1.29549	-1.43225	-0.748185	-1.47585	1.51674	0.569221	0.286451	2.95667	0.291719	-0.43521	1.05308	0.0832387	-0.690381	0.342015	-1.25373	-1.16455	-1.38568	-1.00707	0.983655	0.664147	-1.38662	1.81472
A_23_P92860	CCNO	chr5	q11.2	-0.749925	-0.0845631	-0.265827	-0.558409	-0.429292	-0.760993	-0.77806	-0.819939	-0.614385	-0.541629	-0.606727	-0.803992	-0.749925	-0.756451	-0.695064	-0.740156	-0.621599	-0.882973	-0.924216	-0.848226	-0.767528	-0.853456	-0.751358	-0.0214531	-0.726594	-0.55086	-0.476642	-0.526839	-0.485358	-0.432241	-0.501246	2.32076	0.459485	-0.0362374	1.02753	1.23974	1.8577	0.951829	1.70526	-0.32756	0.442455	3.98427	-0.0519897	-0.220733	0.258498	0.713486
A_23_P212522	ATP11B	chr3	q26.33	-0.749943	0.722904	-0.339468	-1.10633	0.362628	-0.732523	0.344853	-0.773965	0.737655	0.817059	1.65813	-1.99023	-1.23964	-0.749602	-0.8706	0.770024	-1.13452	-1.58651	-1.66232	-2.45916	0.61363	-0.281781	0.270543	-0.72438	-1.02328	0.395756	-0.749943	-0.752346	0.558796	0.710905	0.387951	-0.689942	0.734902	0.803994	1.88061	1.04552	0.753996	1.57365	0.660762	-0.739738	0.990016	1.4924	0.241033	0.94199	0.477485	0.442139
A_24_P359799	OTX1	chr2	p15	-0.754451	0.681762	-0.464748	-0.402113	-0.681879	-0.754451	-0.767525	-1.02118	-0.811805	-0.791457	-0.832586	-0.812299	-0.78202	-0.42827	-0.74149	-0.207471	-0.747468	-0.453577	-0.797805	-0.211145	-0.82234	-0.741555	-0.788109	-0.841125	-0.793555	-0.86892	-0.466071	-0.753223	0.495413	1.63076	1.94687	0.531656	1.86299	0.843209	2.35677	2.38176	-0.394116	-0.0701001	0.739937	-0.433904	0.208464	1.02122	-0.548743	-0.736677	-0.688653	1.80824
A_24_P125273	ARL4D	chr17	q21.31	-0.755334	0.268257	-0.0676417	-1.28853	-0.154887	-0.365846	-0.853277	0.236015	-0.259364	-0.379538	0.230103	1.02982	-0.491337	-0.496079	-1.15357	-0.780742	-0.565433	-1.25388	-0.950373	-0.329581	-0.755334	-0.83212	-0.663833	-0.198583	-1.28343	-0.833815	-1.08834	-1.60835	2.43649	2.56608	1.76335	1.62868	2.21939	1.86407	2.36816	-0.773483	0.999	0.243864	-0.925897	-0.131223	-0.484673	-0.203762	-0.944514	-0.652849	-0.880577	0.141091
A_24_P156295	ACSS2	chr20	q11.22	-0.75567	0.474729	-0.317682	-0.445157	-0.311617	-0.987781	-1.42674	0.115035	0.995958	-0.426059	0.827552	0.830447	1.13025	-0.505635	-1.02837	-0.75567	-0.831059	-0.0133465	-0.807694	-0.468278	-0.814893	-0.758353	-0.953413	0.106056	-0.94688	-1.11162	-0.699228	-1.62428	2.20477	2.47903	0.759792	1.08924	0.438102	0.260087	2.32803	0.483204	-0.474803	1.70452	-0.960127	-0.864819	1.57072	1.66106	-0.571027	0.836475	0.246268	1.11104
A_24_P206848	HNRNPUL2	chr11	q12.3	-0.756325	0.329712	0.247785	0.0534967	-0.756325	-2.23605	-0.90023	0.5425	-0.0363267	-0.200811	-0.900185	-1.9546	-0.48182	-1.56652	0.127909	-0.429044	-0.952969	-1.19143	-1.66805	-1.55139	-0.320196	-1.52326	-0.956314	-0.00220827	-0.0374792	-0.843221	0.476748	0.527015	0.714215	1.59077	0.418759	-1.72798	0.0681434	0.480004	0.280772	-0.938219	1.82217	1.11801	-0.0363953	-1.03535	0.887746	-0.328832	1.49862	-0.310764	0.65924	1.06856
A_23_P111194	SPDEF	chr6	p21.31	-0.758279	0.150202	0.364819	-0.819275	-0.730446	-0.763607	-1.10391	-0.189698	-0.192872	-0.383633	-0.312427	-0.607539	-0.789344	-0.585705	-1.29262	-0.45691	-1.06028	-0.560348	-0.613622	-0.0740506	-1.12012	-0.780001	-0.758279	-0.704194	-0.865767	-0.919534	-1.43701	-0.423552	1.27629	1.60382	0.734261	-0.114522	-0.447188	-0.641052	2.01057	0.410726	-0.775479	1.07754	-0.628711	0.857812	5.17216	0.839544	-0.440059	-0.461155	0.899845	0.440749
A_24_P260361	BBS7	chr4	q27	-0.758554	0.131399	0.0286072	-0.403972	-0.806152	-0.577042	-0.641946	-0.814685	-0.0406034	-0.21378	-0.430143	0.716264	-1.92327	-1.30835	-0.313113	-0.685862	-1.26557	-1.17669	-1.16331	-0.952865	0.461759	-0.0735921	0.376658	-0.675251	-0.758554	-1.17845	-1.34864	-0.884203	-0.442351	-1.2439	-0.245424	1.44822	-0.773164	0.293137	0.143632	-0.536479	0.765201	1.14152	0.479679	-0.170635	1.49213	-0.112578	2.34034	0.0594905	0.673744	0.372651
A_24_P403928	PAPLN	chr14	q24.2	-0.759342	0.76312	0.0325056	0.113015	-0.617605	-0.762047	-0.457757	-1.2494	-0.326331	-0.242234	-1.18197	0.683708	-0.971898	-0.521612	-0.870118	-0.647652	-0.963916	-0.342377	-1.26766	-1.27511	0.736414	-1.05485	-0.828718	-0.69459	-0.779666	-0.484988	-0.759342	-1.082	2.64576	0.904935	1.33628	1.50978	-0.607515	2.0089	-0.334902	0.934291	1.20016	-0.438938	0.136539	-0.699973	0.0380689	-0.371604	-1.01709	-0.454528	-1.02172	1.93171
A_24_P382266	PIAS2	chr18	q21.1	-0.76231	0.388583	0.110768	-0.333235	-0.241072	-0.470043	-0.76231	-1.29684	-0.769933	-0.338161	0.397247	-1.63621	0.00441102	-1.03991	-0.913102	-0.974976	-1.3978	-0.130913	-0.364338	0.58619	-0.83503	-0.603266	-1.25209	0.0425272	-1.25657	-2.04286	1.01594	-0.60601	0.088394	0.681976	0.68121	-1.37631	1.03488	0.85422	1.04817	-0.504007	2.47309	-0.010972	2.01472	-1.53562	2.36449	0.466266	0.727274	0.656362	0.389141	-0.685542
A_23_P97402	CAMK1G	chr1	q32.2	-0.767114	0.0184599	0.0216445	-0.597219	-0.767114	-1.10286	-1.03716	-0.290309	-0.543767	-0.83799	-0.53007	-0.575291	-0.995733	-0.681267	-0.879043	-1.07708	-0.512739	-0.381681	-1.18304	-0.546053	-0.210677	-0.779512	-0.546511	-0.519455	0.199075	-0.926648	-0.941541	-0.869211	1.27906	1.71457	0.728205	0.25728	0.64767	-0.337544	-0.344134	-0.481684	0.00263499	-0.505193	-0.625031	0.661395	2.60126	-0.686603	-0.995061	-0.471385	-0.731744	-0.639499
A_23_P337800	IL29	chr19	q13.2	-0.769239	0.26545	0.137952	-0.769239	0.0880922	-0.874856	-1.47257	-0.155059	-1.21221	-1.22645	-1.1374	-0.48209	-1.03205	-0.225293	-1.44463	-0.414735	-1.98076	-1.09681	-1.43932	-1.08487	-1.14362	-0.700884	-0.238676	0.137952	-0.11817	0.0631469	-0.476403	0.416716	-0.980784	-0.562654	-0.889248	2.21755	0.382222	1.03043	1.20005	1.75706	0.484053	0.646251	0.396883	4.26607	-0.298479	-0.259145	0.756127	0.504893	0.874795	-0.139587
A_23_P86012	LAMB3	chr1	q32.2	-0.771403	0.526748	0.216373	-1.15624	-1.13418	-0.768934	-0.771403	-0.683596	0.473088	-0.0866283	-0.203226	-0.0146516	-0.598983	-0.707073	-1.32651	-1.91715	-0.885539	-0.767033	-1.34604	0.563485	-0.0947677	-0.582839	-1.67891	-1.18205	-0.846327	-1.37519	-1.7563	-1.18212	1.05122	1.81415	1.08929	0.392915	1.44475	-0.147447	0.669762	1.14578	-1.40598	-0.203035	0.216373	0.0421997	-0.511286	-1.87175	-1.91158	0.227379	-0.702762	0.418986
A_23_P143348	OVOL2	chr20	p11.23	-0.773192	-0.0546327	0.032543	-0.0548897	-0.356699	-0.746513	-0.91956	-0.601639	-0.477445	-0.370295	-0.391144	-0.997098	-0.773192	-1.09931	-0.887227	-1.18861	-0.808296	-1.23188	-0.56651	-1.03849	-0.788608	-0.993346	-1.18514	-0.424995	-0.205384	-0.39932	-0.184803	-0.169771	0.066	-0.120909	0.0942845	-0.0563601	-0.565975	1.04466	-0.0733925	0.0519395	1.94538	-0.154846	0.032543	0.330366	-0.16112	0.31598	-0.220007	0.0164236	0.0719548	-0.265648
A_23_P358009	DNAJC16	chr1	p36.21	-0.774562	0.875228	-0.299173	-0.873162	-0.774562	-0.870407	-1.50295	-1.7903	0.435139	-0.26368	-1.52638	0.330292	-1.38312	-0.592796	-1.15569	0.498095	-0.707354	-1.24082	-1.41339	-1.0205	0.0778518	0.33291	0.496258	-1.29255	-0.617206	0.150641	-1.69647	-1.11107	1.6201	1.07424	0.905894	0.412154	0.844563	0.745112	1.67214	0.969834	-0.299173	0.457955	0.649569	0.0153803	-0.468824	1.98885	1.64183	1.30742	-0.749319	1.40611
A_23_P435604	KIAA0090	chr1	p36.13	-0.777677	0.636486	0.216011	-0.130179	-0.152118	-0.634952	-0.934499	0.260767	0.316308	-1.43085	-1.54981	-1.10599	-1.64766	-0.852756	-0.777677	0.621611	-0.664629	-0.812619	-1.00922	-1.62998	-1.64546	0.00960661	-0.441436	-0.731385	-0.993212	-0.527031	-1.67932	0.263235	0.954079	2.71534	1.82848	0.0180533	0.742874	-0.645453	2.08168	1.55255	0.366961	0.413036	0.858713	-0.0959563	0.866734	0.737363	0.571387	1.47095	-2.03813	1.4754
A_24_P18965	FAM134C	chr17	q21.2	-0.778134	0.73356	0.479693	-1.46632	-0.982531	-1.33021	-1.01323	-0.778134	-0.329294	-0.743146	-1.257	0.823514	-0.576306	-0.531718	-1.18439	0.66506	-0.688887	-1.23354	-1.44917	-1.16792	-0.645114	-1.2981	0.616191	-1.48597	-0.76255	-1.10867	-0.538372	-1.45256	1.49275	1.01719	0.718456	0.894952	0.881601	0.477465	2.12121	-0.605453	0.757649	1.68514	-0.982824	-1.2859	0.219774	-1.09034	1.05406	1.50601	-0.733389	0.638393
A_23_P90523	OCEL1	chr19	p13.11	-0.779216	0.514336	0.435316	-0.456395	-0.972669	-0.180006	-1.44433	-0.107236	-1.54965	-0.686569	-0.395773	0.809256	-0.379991	0.190237	-0.801377	-2.28154	-1.41593	-1.05018	-1.07336	-1.39764	-0.779216	-0.347434	-0.20663	1.02726	-0.195572	-0.561462	-0.987711	-1.92073	0.380853	-0.12464	-0.38357	4.12278	-0.0736641	0.421146	-0.137035	0.684819	0.839535	-0.607087	-1.30533	-0.570324	0.435316	0.475616	-0.283133	0.592812	0.615333	0.855299
A_23_P59452	ABP1	chr7	q36.1	-0.779413	0.577997	-0.287731	-0.358619	-0.757703	-1.42758	-1.03922	-1.06678	-1.13194	-1.27844	-0.976729	-0.702782	-0.743274	-0.741226	-1.11846	-0.4678	-1.33012	-0.779413	-0.988304	-1.08076	-1.04907	-0.589132	-0.877112	-1.04299	0.137621	-0.573729	-0.732491	0.723374	1.13324	0.323595	-0.0480737	0.637132	0.178776	-0.262831	-0.0313339	-0.947103	-0.628945	-0.107832	0.0965667	2.47738	-0.893332	0.483498	0.694772	3.26972	1.36091	1.4319
A_23_P157593	CHRNA6	chr8	p11.21	-0.779671	0.282139	0.0131626	-0.513794	-0.0245157	-1.28693	-0.779671	-1.20687	-0.59186	-0.425656	-0.728155	-0.366682	-1.06386	-0.896779	-0.944654	-1.02983	-0.57482	-0.958628	-1.21409	-1.08046	-0.994199	-0.812813	-0.157773	0.394286	-0.652637	-0.309774	-0.740744	-0.333669	-0.554961	0.422437	0.0973518	-0.177573	3.79561	3.80228	-0.880863	-0.544384	0.0836399	1.12714	-0.523321	0.500356	-0.496514	-0.52602	-0.174847	0.150115	0.279523	0.430306
A_23_P256470	NPY	chr7	p15.3	-0.780472	0.74715	-0.574696	-0.91925	-0.852956	-1.0203	-0.935141	0.125035	-0.938512	-1.06102	-1.04267	-0.757856	-0.780472	-0.605489	-0.148069	-0.533417	-0.842676	-0.33693	0.139634	-0.705796	-0.993344	-0.911349	-0.801499	-0.870396	-0.659962	-0.744684	-0.884142	-0.617582	1.93813	1.7602	2.00375	1.98443	2.55064	2.11671	1.86655	0.918316	-0.399132	0.0105726	0.526419	0.817673	-0.327121	0.20501	0.0458711	-0.770021	-0.72771	-0.946102
A_23_P84995	MTMR8	chrX	q11.2	-0.781981	0.330488	0.0403862	-1.32923	-0.385999	-1.4858	-1.40361	0.136994	-1.0748	-0.781981	1.06668	-0.211813	-1.21241	-1.47658	-0.329621	-1.29247	-1.62333	-0.622828	0.408564	-0.522203	-0.818891	-0.984506	0.152018	-0.111044	-0.58927	0.18387	-0.868781	0.314831	-1.24645	0.364768	0.337112	-0.60854	-0.672252	0.569898	2.55112	1.64453	1.03307	1.24205	-0.207892	-1.39445	1.00442	-0.809598	2.76219	-0.580035	0.559462	0.123718
A_23_P5995	ARFGEF2	chr20	q13.13	-0.783568	0.661888	-0.306346	-0.533965	-0.739048	-0.854363	-0.797655	-1.74566	-0.626123	-0.140595	-0.0560846	-0.401751	-0.800558	-1.41095	-0.331007	-0.783568	-0.691048	-1.12101	-0.704105	-1.05442	-1.12596	-0.343852	-1.38185	-0.742617	-0.825548	-0.134841	0.373313	-0.811571	-0.421775	0.698517	1.68606	-0.75344	2.21999	0.625259	2.32972	-0.647675	-0.306346	1.09533	1.75062	-0.898856	-0.355516	0.885634	2.98434	1.33768	0.921093	-0.53767
A_23_P145485	ULBP2	chr6	q25.1	-0.784865	0.154647	-0.119799	0.0139455	-0.147003	-1.13511	-0.0499081	-0.784865	0.0739833	-0.426124	0.447289	-0.174182	-0.173358	-0.871043	-1.16605	-0.425813	-0.785818	-0.828204	0.0196657	-0.531659	-0.832829	-1.10055	-1.34892	-0.0360427	-0.748433	-1.26992	-0.793666	-0.838412	-0.514435	0.120289	-0.309284	1.57025	0.189004	-0.0687886	1.36099	-0.207837	-0.0366828	1.86807	-0.101158	-0.398532	-0.215693	0.579695	0.00822763	5.32636	-0.511043	0.439915
A_32_P206479	ZNF831	chr20	q13.32	-0.787419	-0.0368776	-0.0911151	-0.214862	-0.142489	-1.38214	-1.26758	-1.47456	-0.151768	-0.233708	0.0840772	-0.228506	-0.97424	-0.787419	-1.34417	-1.4202	-0.535609	-0.514819	-1.02447	-1.27486	-1.10315	-0.885894	-0.928348	-0.169303	-0.263286	-0.148101	-0.0435732	-0.10691	0.249045	0.0426895	0.293043	-0.15135	-0.225904	-0.151212	-0.209298	0.0702999	0.309333	1.37792	-0.404666	0.58315	1.11008	-0.257066	-0.0568591	-0.134361	-0.232366	0.281066
A_23_P171388	TMSB4Y	chrY	q11.221	-0.790681	0.405489	-0.0613967	-0.285687	-0.148077	-1.48413	-1.08585	-1.91175	-0.463594	-1.11178	-0.327549	-0.627577	-0.184774	-0.790681	-1.58449	-0.295473	-0.980624	-1.33417	-0.0157141	-0.123658	-1.622	-0.856987	-1.13357	-0.22001	-0.309708	-0.146421	-1.11291	0.963312	1.1422	1.75077	2.31367	0.201955	1.30451	-0.624013	0.409239	2.54961	0.666349	-0.673079	1.28242	-0.63013	-0.0613967	-0.740557	0.524636	1.00254	-0.0233771	1.40875
A_24_P232809	GSC	chr14	q32.13	-0.79616	0.341916	-0.28333	-0.857697	-0.84263	-0.948362	-0.552319	-0.769488	0.235478	-0.795894	-0.829214	-0.252977	-0.518706	-0.222413	-0.802288	0.572924	-0.703518	-0.418204	-1.01332	-0.816903	-0.805718	-0.854007	-0.732611	-0.813177	-0.906524	-0.79616	-0.82633	-0.924657	-0.169797	-0.668552	-0.598728	2.3031	0.230587	0.227908	-0.737153	0.967074	0.24306	2.51134	1.26518	2.34162	0.559971	2.04653	0.740301	2.28887	1.89954	0.453245
A_23_P94397	OMD	chr9	q22.31	-0.797192	0.0235246	0.0986922	-0.232428	-0.111946	-1.47016	-1.44475	-1.02273	-0.131731	-0.151945	-0.240046	-0.733747	-1.26125	-1.33026	-1.13978	-0.91538	-1.39857	-0.769214	-1.47302	-0.942943	-0.662343	-1.14688	-0.797192	-0.159931	-0.165843	0.131931	0.437323	0.0641383	0.0289953	-0.0668042	-0.101337	-0.228157	0.0143654	0.0180538	0.292063	-0.116239	4.96447	0.417086	0.234983	-0.245239	-0.188926	-0.228265	0.0583357	0.523645	-0.120629	0.535519
A_23_P209578	GAD1	chr2	q31.1	-0.798911	0.83898	0.571918	-0.463276	-1.48249	-0.817673	-0.687766	-1.20228	0.827348	-0.618611	-1.64774	-1.53478	-1.43793	-0.798911	-0.738188	-0.492506	0.720802	0.700933	-0.546208	0.826104	-1.50407	-1.13833	-1.5161	-0.772676	-0.4811	-1.70487	-0.867041	-1.57649	1.26618	1.15379	1.16039	0.917697	1.30453	-0.578865	1.86416	0.847671	0.62068	-1.22477	0.838737	1.0797	-0.81291	1.17755	-1.51407	0.65128	-0.56813	0.958956
A_23_P112554	COL15A1	chr9	q22.33	-0.800163	0.347534	0.394621	-1.2603	-0.893711	-0.737107	0.0942988	-0.617692	0.082959	0.571229	0.638717	0.248358	-0.380872	-0.990858	-0.905616	-0.800163	-0.726474	-0.487765	-0.487459	-0.848415	-1.35679	-1.18066	-0.965126	-0.797716	-0.81544	-1.0311	-1.31746	-0.786805	0.351182	1.86294	0.100339	-0.557698	-0.464252	-0.848628	-0.191012	0.343886	0.139198	1.02214	0.479956	-0.899226	0.761573	-1.20847	-0.766558	1.50582	0.061392	1.07704
A_23_P28595	DLX2	chr2	q31.1	-0.803331	0.397771	-0.537021	-0.570265	-0.641894	-0.817217	-0.859221	-0.634871	-0.597229	-0.634835	-0.606994	-0.846468	-0.803331	-0.84771	-0.872139	-0.736254	-0.825532	-0.882458	-0.775683	-0.863696	-0.847472	-0.861446	-0.822047	-0.60351	-0.616075	-0.638272	-0.65441	-0.612533	1.81788	1.69353	1.93117	1.75611	2.2853	1.98378	1.98806	1.08139	1.73649	1.60227	1.31888	0.159619	0.428198	0.682696	-0.544934	-0.379008	-0.563662	-0.521989
A_24_P687372	PTPN9	chr15	q24.2	-0.803372	0.523863	0.108294	-0.905324	-1.0332	-0.00189879	-0.907568	-0.690259	0.402043	0.37361	0.14708	-0.803372	-0.00483812	-0.0622997	-0.994943	-0.205587	-0.69345	-0.178758	-0.884894	0.414118	-0.751804	-1.54411	-1.06994	-1.20142	-1.64875	-1.53143	-2.23782	-1.41416	2.12782	0.38748	0.994123	-0.897539	0.575456	0.232231	0.634509	0.248641	0.108294	0.483987	-0.907505	-1.13967	4.12974	1.53988	0.274252	1.10475	2.19491	0.66783
A_23_P150379	MPZL2	chr11	q23.3	-0.805923	0.382702	-0.0893689	0.86589	-0.53671	-0.161571	-0.670509	0.977883	-0.64494	-0.27726	1.29335	0.8629	-0.911269	-1.08674	-1.47263	-0.969096	-0.646557	-1.44837	0.0165655	-1.05116	-1.47249	-1.68648	-1.59396	-0.0893689	-0.530737	-0.847767	-0.81335	-0.805923	-0.264128	0.709786	-0.451023	-1.1628	1.05268	-0.21157	-0.572574	-0.175858	1.62967	0.611464	-0.211886	-1.05146	0.297181	-0.763795	2.54501	0.421603	-0.144161	1.18128
A_23_P85664	UBXN10	chr1	p36.12	-0.806939	0.279176	-0.266959	-0.82456	-0.532269	-0.544386	-1.46787	-0.202697	-0.334134	-0.637258	0.641585	-0.465676	0.5915	-1.2442	-1.45745	-1.21235	-1.02011	-0.37535	0.334585	-1.3707	-1.04911	-1.24193	-0.788651	0.861717	-0.806939	-0.848864	-0.860572	-0.114175	1.45734	0.34555	0.773364	-0.348209	-0.632806	-0.0546054	-0.663852	-0.57068	0.833532	0.842522	3.30977	-0.0386284	-0.411827	-0.682282	0.317036	0.508492	2.26889	-0.358139
A_24_P230675	SOCS2	chr12	q22	-0.808305	0.428726	-0.195471	-0.878972	-0.955936	-0.923882	0.0786761	-0.3953	-0.552068	-0.149762	1.03858	-0.79674	-0.808305	-1.14317	-1.361	-0.744954	0.181946	-0.143107	-0.765501	0.993147	-1.54364	-1.71565	-1.5941	-1.14429	0.6493	-1.73594	-1.25211	-1.22729	1.42202	0.446608	1.25966	-0.0750208	2.73371	1.63999	1.58315	-0.652971	0.0750223	1.46405	1.96456	-0.0831641	1.05884	1.90722	0.692055	0.981015	-0.0744124	0.410844
A_23_P409502	NLRP9	chr19	q13.42	-0.810739	0.0675357	0.00673054	-0.986014	-0.147301	-1.07083	-0.980568	-1.1135	-0.0147277	-0.66285	3.79144	-1.11808	-1.32439	-0.774359	-0.934224	-0.810739	-1.9666	-0.365664	-1.91522	-0.787765	-0.746432	-1.05482	-0.896067	-0.181428	0.0912508	0.652463	0.0420533	0.463362	-0.167639	2.8804	0.675443	-0.938097	-0.166512	0.496746	-0.125804	2.52299	0.178029	-0.0522465	-0.626164	0.225955	0.00673054	-0.547313	-0.0193964	0.713271	-0.301642	0.341047
A_23_P114445	MAGEE1	chrX	q13.3	-0.812538	0.306431	0.46006	-0.884132	-0.56589	-1.00096	-1.09967	-0.232416	-0.150244	-0.847918	-1.00996	-0.869605	-1.02197	-0.337211	-1.87773	-1.05366	-1.55396	-0.812538	-2.05518	-1.89073	0.193885	-0.0552964	-0.529694	-0.97385	-0.621187	-0.0915842	-0.563289	0.493027	-0.710328	0.363998	0.138709	-0.366661	-0.177812	0.571922	0.973215	-0.273829	0.46006	-0.0750583	0.722535	-0.524787	-0.431871	-0.898224	1.21595	0.384594	1.38414	0.492117
A_23_P160869	LRIG2	chr1	p13.2	-0.815124	0.462669	-0.177224	-1.07115	-0.567124	-0.703287	-0.913408	-0.840157	0.372687	0.0178843	0.919889	-0.475254	-1.03794	-0.282684	-0.719232	-1.04283	-0.638942	-0.962078	-0.886078	-0.815124	-1.29	-1.05192	-0.252715	-0.289299	-0.970254	-0.620814	-1.11075	0.363077	-0.017971	1.38907	1.04162	-0.448728	1.07537	1.44331	2.32227	1.16185	1.73046	1.07275	2.61206	0.974759	2.05084	-0.189393	1.98291	0.692714	0.0920182	0.209286
A_24_P170234	RNF148	chr7	q31.32	-0.821397	0.0233212	0.519577	-0.685362	-0.728379	-1.63591	-1.59597	-1.86266	0.247279	0.690929	-0.045899	-0.799822	-1.5495	-1.0143	-0.847498	-1.58572	-2.43655	-1.0717	-0.214155	-0.821397	-1.19448	-1.01405	-0.0748079	0.111384	0.167317	-0.0232548	-0.177525	-0.359109	-0.348669	0.752887	-0.547316	1.03014	-0.738781	-0.32502	2.05611	0.771516	-0.833433	-0.42133	2.65032	-0.180474	2.66714	0.519577	-0.530054	0.221898	-0.396297	-0.134246
A_23_P334123	ITFG1	chr16	q12.1	-0.822862	0.399484	0.0304861	-2.12314	-0.934719	-0.182681	-1.08559	-0.0342594	-0.197755	-1.66422	-0.388039	0.251918	-0.822862	-1.44088	-0.523289	0.288356	-1.17649	-0.496246	-0.122256	-0.291855	-0.38201	-0.398782	-1.26901	-0.688952	-0.870874	-1.02661	-1.05549	-1.18765	1.57243	1.96557	1.69021	-0.291954	1.70194	0.544317	0.0559804	-0.311859	0.373829	0.382325	-1.81681	-0.590913	-0.448139	-0.21582	0.0893326	-1.26135	-0.115068	0.611238
A_23_P367618	ZIC1	chr3	q24	-0.823121	0.305416	0.706677	-0.6045	-0.434428	-0.643744	-0.540327	-0.823121	-1.02098	-1.05769	-0.752109	0.206433	-0.964639	-1.46701	-1.32394	-1.31117	-0.992414	-0.640136	-0.651524	-1.49686	0.328645	-1.61059	-1.59294	0.9541	-0.272661	0.0865257	-0.890497	-0.820355	1.01348	1.68294	1.41377	-0.243597	-0.8744	-0.799918	0.873594	1.76509	0.156476	0.585047	0.428447	0.0738004	1.02835	1.47041	1.66359	-1.74881	1.1895	1.14154
A_23_P123336	PDP1	chr8	q22.1	-0.823356	0.358271	-0.0482303	-1.01014	-0.953098	-1.38773	-1.02349	-1.0162	0.376092	0.247454	-0.201333	0.27202	-1.23251	-0.823356	-0.722157	-1.03369	-1.25381	-1.79224	-0.8156	-0.709932	1.22072	-1.0855	-0.342175	-0.644962	-0.0716379	0.274754	-0.491122	-1.41221	1.11805	0.827104	0.531566	-0.841426	0.137241	0.464518	-0.0468104	0.175106	0.250454	1.03287	-0.697982	-0.574729	0.229243	-0.0482303	1.18282	-0.15906	-2.09323	0.367843
A_24_P128442	TBX15	chr1	p12	-0.824093	0.841128	-0.156886	-0.287292	-0.301822	-0.824093	0.0947121	0.452257	-0.774982	-0.779618	0.0439633	-0.344007	-0.242701	-1.26607	-1.30877	-0.50416	-1.32549	-0.976221	-0.771394	-1.01016	-1.47757	-1.3034	-1.60755	-1.08944	-1.08971	-1.41883	-1.07138	-0.465623	-0.47514	1.1129	-0.0753099	1.52743	0.756404	-0.235014	-0.176921	-0.216754	0.191962	1.87586	-0.162447	-0.70551	2.61654	0.214925	1.71901	1.08519	0.925851	1.32464
A_24_P453901	SH2D3C	chr9	q34.11	-0.824758	0.377911	0.0353952	1.44491	0.287663	-1.09163	0.411037	-1.89736	0.628321	-0.0547054	-0.347152	-1.00135	-0.567502	-0.697257	-1.61893	-1.27568	-1.89658	-0.824758	-1.21315	-1.0587	-0.866263	-1.45538	-2.08969	-0.706517	-0.804699	-0.277858	0.314283	-0.0355887	0.735901	1.92669	1.90072	0.368646	0.268706	0.157686	0.748192	-0.430262	1.00342	-1.04515	-0.318113	0.91234	-0.153391	0.284522	-0.523112	0.099419	-0.169475	0.579839
A_23_P307382	SLC32A1	chr20	q11.23	-0.825681	0.434435	-0.374963	-0.772233	-0.825681	-0.8847	-0.919163	0.497356	-0.806106	-0.790076	-0.795521	-0.987158	-0.888325	-0.881812	-0.794211	-0.978168	-0.854456	-0.699785	-0.845193	-0.96018	-0.667908	-0.321759	-0.873732	0.530514	-0.135756	-0.875507	-0.819584	-0.337138	1.80159	1.48168	1.56672	0.849088	1.90002	1.16519	1.25224	0.308943	-0.599782	-0.389489	0.634995	0.624933	1.02419	0.7467	-0.348041	-0.513196	-0.722733	-0.763051
A_24_P911571	GNB5	chr15	q21.2	-0.826357	0.195158	0.278101	-0.826357	0.439023	-1.39303	-1.24985	0.374471	-0.332611	-0.152929	0.278101	-0.810094	-0.918531	-1.79791	-0.955797	-0.785648	-0.712021	-0.704179	-0.855525	-0.881407	-0.858394	-1.14968	-1.1495	0.443083	-0.41691	-0.155983	-0.0926541	-0.849747	-0.063778	-0.172368	-0.0988436	0.599732	0.627738	0.667294	0.618724	-0.0859648	1.32862	-0.193925	0.284801	-1.47758	1.02157	3.98035	0.681016	-0.0787594	-1.24773	0.283242
A_32_P170444	SUB1	chr5	p13.3	-0.826424	0.821872	-0.104683	-1.12137	-0.480168	-0.826424	-0.592394	-0.918924	-0.889238	-1.03903	-0.751922	-0.882265	-0.49899	-0.490884	0.666002	-0.306375	-0.803167	-0.892543	-0.33376	0.808642	-1.04782	0.691933	-0.565006	1.24967	-0.876441	-1.078	-1.08836	-1.00465	1.38482	2.0906	1.62881	1.44817	2.07366	1.23886	-0.692871	-1.39823	-0.500242	-1.05622	-1.52773	0.607155	1.21706	0.801861	-0.832609	1.2017	1.26539	0.914763
A_23_P257003	PCSK5	chr9	q21.13	-0.833232	0.350464	0.390836	-0.833232	-0.709102	-0.771191	-1.29933	-0.346264	-0.0259263	0.712478	-0.536911	0.553793	-0.423485	-0.88856	-1.40693	-1.37763	-0.939767	-0.705158	-1.03269	-1.40052	0.199398	-0.889918	-0.868693	-0.161298	-0.597573	-0.767333	-1.11313	-1.36636	-0.119279	-0.0148021	0.500612	1.00169	0.661354	1.10442	-0.197136	0.483257	-0.0552136	-0.756847	-0.186393	-0.125669	1.50102	2.12932	-0.317222	-2.09369	1.42469	0.552154
A_23_P54006	HECTD1	chr14	q12	-0.836152	0.354346	0.348397	0.11262	-0.416628	-0.965945	-0.969359	-0.938631	-0.836152	0.495357	-0.166638	-1.67969	-1.6849	-2.21098	-0.211357	-0.535916	-1.16197	-0.888446	-0.344341	-0.771816	-0.425475	-1.09116	-1.84751	-0.886812	-0.805259	-1.45609	-0.598942	0.0274805	0.502924	0.376422	1.32281	-0.944088	1.68992	0.743014	1.31572	-0.155773	1.18258	0.605252	0.214698	-0.194639	1.88821	2.19203	2.88813	-0.0218237	-0.69763	0.286435
A_24_P64653	METTL7B	chr12	q13.2	-0.836562	0.626844	-0.135811	0.127917	-0.773615	-0.377782	-1.08599	0.489205	0.884179	-0.0801459	-0.212986	0.105148	-0.183532	-0.389217	-1.51407	-1.12269	-1.09964	-0.945578	-1.12955	-0.660093	-0.904434	-1.24545	-1.17806	0.799726	-0.836562	-0.611494	-1.33383	-0.966888	1.21184	0.354174	0.653345	1.04776	0.335686	-0.433505	0.818154	0.775237	-0.95238	-0.288628	-0.135811	1.15419	-0.405417	-0.745549	0.228398	-0.949092	0.887927	2.32973
A_23_P145507	EYA4	chr6	q23.2	-0.83833	0.841412	-0.594406	-0.83833	-0.457079	-1.01743	-1.12262	-0.989115	-0.991303	-1.06588	-0.989159	-1.06347	-1.11525	-0.142341	1.15266	-1.02635	-0.753645	-0.453742	-0.921112	-0.71003	-0.750567	-0.657296	-0.95378	-1.03361	-0.112575	-0.864442	-0.214105	-0.582553	1.59679	2.22734	1.81155	1.52341	0.0808717	0.608842	0.860258	1.64913	0.279783	-0.00723441	0.32051	0.822565	-0.884341	1.30537	0.522072	-1.02394	1.36017	1.81983
A_23_P692	KCND3	chr1	p13.2	-0.838847	0.243826	0.386476	0.188213	-0.294689	-1.80518	-1.05017	-0.289246	0.383267	0.818678	1.26077	-1.47738	-0.87522	-0.306209	-2.2637	-1.50426	-1.32992	-0.919695	-0.853607	0.0362032	-2.16748	-1.20993	-0.838847	0.206803	-0.139563	-0.00116866	-0.262287	-0.357651	1.56592	2.91248	0.416815	-0.299146	1.81126	0.933376	1.02165	-0.608565	1.49023	-1.01961	-1.1136	1.72093	-1.20082	0.936965	0.61976	-0.895215	1.29361	-0.314555
A_23_P24234	OPN4	chr10	q23.2	-0.838949	0.184449	0.16218	0.116156	-0.320603	0.225519	-2.13793	-0.854686	-0.156626	-0.372307	0.16218	-0.410325	-1.72347	-1.44047	0.119946	-1.43948	-1.19701	-1.67831	-1.41995	-0.838949	0.156962	-1.44828	-1.17447	-1.29537	0.556938	-0.999338	-0.230609	0.613832	0.610595	0.116597	0.154714	-0.121686	-0.0885154	-0.405252	1.55239	-0.0864194	-0.250088	-0.0313155	1.32083	-0.14338	0.345289	0.786468	0.478815	0.55968	1.39732	0.851934
A_23_P430442	NUFIP2	chr17	q11.2	-0.840468	0.697221	0.328695	-0.793045	-1.28217	-0.911439	-1.48308	-0.929635	0.785746	0.586095	0.672927	-0.410229	-1.58828	-0.483523	-1.21977	0.614065	-0.588539	-1.44133	-1.82001	-1.51709	-0.840468	-0.842092	-2.55564	-0.866646	0.423136	-0.509643	-0.616683	-0.328864	0.751078	0.884574	0.897914	0.643365	0.118823	0.345935	2.41332	1.69906	-0.155291	0.527266	-0.922964	-1.25304	0.988812	1.07853	1.96176	0.929859	1.92719	0.804259
A_23_P214144	COL10A1	chr6	q22.1	-0.841375	0.00776431	0.162444	-0.597907	-0.328759	-1.13513	-1.41972	-0.841375	-0.290283	-0.667944	-0.92454	-0.539088	-1.06668	-0.617758	-1.40826	-0.908265	-1.11062	-0.808972	-1.25813	-1.22441	-1.2571	-0.850031	-1.07711	-0.172303	-0.23639	-0.201672	-0.358389	-0.233636	1.89257	1.72667	-0.319386	-0.113018	0.109201	-0.656463	-0.647462	-0.781605	1.08691	1.2409	-0.252621	-0.329302	0.602383	-0.839619	0.139158	-0.196257	-0.154313	1.51305
A_23_P14543	ALKBH1	chr14	q24.3	-0.84623	0.576713	0.078543	0.381483	0.178093	-0.539317	-0.928877	-1.03702	-0.428699	-0.410253	-0.623989	-0.963436	-0.84623	-0.959143	-0.0889394	1.34688	-0.868472	-0.5575	0.0862936	0.164042	-2.43734	-1.11927	-1.00181	0.920974	-1.59464	-1.41976	-1.0934	0.609781	0.626528	-0.180294	1.18729	0.526899	-0.263345	-0.139706	3.28062	1.37882	1.23603	0.724195	-0.833961	1.18444	0.186727	0.108306	1.87225	0.256907	0.651556	1.13406
A_23_P134764	LY6D	chr8	q24.3	-0.846324	0.324705	0.0404309	-0.391559	0.404967	-1.40218	-1.36956	-0.326977	-1.08571	-1.10899	-0.99403	-0.717989	-1.37876	-0.801429	-1.65084	-0.711616	-0.987643	-1.47562	-1.41019	-1.26113	-1.13442	-0.846324	-0.689774	0.818206	-0.13553	0.193927	-0.366086	0.321346	-0.0689974	0.757833	0.0565382	1.24228	0.329439	-1.18884	-0.125832	-0.928192	-0.0221512	1.03888	0.628423	1.51837	-0.391249	-0.426383	1.21539	1.25056	0.191874	0.248067
A_23_P407654	C7orf51	chr7	q22.1	-0.848113	0.312875	0.232601	0.386713	1.07673	-0.63375	-2.46788	-0.191665	0.785829	0.211072	-0.0661784	-1.81683	-2.33703	-2.18796	-1.94503	-2.20099	-1.77826	-0.848113	-2.19081	-2.19496	-1.42427	-0.486614	-1.51143	0.375875	0.302997	2.09755	0.655906	0.52335	-0.0141686	0.404449	0.369998	0.315372	0.310378	0.250885	0.0964498	0.0645143	0.0963923	0.909728	0.405883	0.41948	0.681977	-0.184971	1.01636	0.00503065	2.49124	0.0853176
A_23_P1286	C10orf82	chr10	q25.3	-0.852599	0.190607	0.200365	0.656912	-0.368436	-1.84264	-1.9116	-1.94319	0.157092	0.0186012	0.200623	-1.91308	-1.50632	-1.77502	-1.60056	-1.7901	-0.567376	-0.852599	-1.13338	-1.6672	0.696503	-1.11149	-0.776428	0.0653629	0.371668	-0.310419	0.332178	0.0676968	1.21609	0.243474	0.889004	-0.0686263	1.86513	-0.172452	-0.510978	-0.226265	0.512249	0.574281	0.00254635	0.0104864	0.0547037	1.20952	-0.278733	0.0789257	0.400736	0.137739
A_23_P392470	NR3C2	chr4	q31.23	-0.853448	0.160665	0.434058	-1.06744	-1.09048	0.008166	-0.232372	-0.294579	-1.50359	-0.903918	-1.37888	-0.841658	-1.40353	-0.998819	-0.853448	-0.397772	0.0112894	-0.216736	-1.15088	-1.01804	-0.307713	0.446095	1.03178	-0.36279	-1.27437	-1.10019	-0.802508	-0.953876	-0.366395	-0.143695	-0.328352	1.58283	-0.0549784	0.417961	-0.797912	-0.683347	0.541441	-0.972695	0.0403984	0.364387	0.360171	0.890481	1.21524	0.132948	-0.952772	1.82517
A_23_P430728	ATP4A	chr19	q13.12	-0.853806	-0.0891084	0.118407	-0.255316	0.0828628	-1.29568	-1.56325	-1.43852	-0.395491	-0.0953406	-0.541148	-1.08827	-0.144596	-0.853806	-0.977765	-1.18427	-1.67671	-1.36959	0.904985	-1.35392	-1.80515	-1.26862	-0.150123	2.36647	-0.216707	0.0415515	-0.0650787	-0.0380504	-0.430718	-0.310596	-0.0889673	0.470716	-0.0847444	-0.350712	0.732954	0.315692	0.7391	-0.250836	0.66105	1.43172	2.88854	0.0722125	0.0545226	-0.199649	-0.332965	-0.571399
A_23_P216118	UNC5D	chr8	p12	-0.855703	0.0922707	0.271857	-0.909187	-0.507183	-1.16465	-0.749655	-0.878487	-0.898778	-0.420944	-0.603084	-0.752462	0.88943	-0.29189	-0.983213	-0.994214	-0.934778	-0.182936	-0.964089	-0.762433	-1.19883	-1.0436	0.189611	-0.512247	-0.855703	-0.91696	-0.847354	-0.828157	-0.475452	-0.577723	0.146019	-0.344309	-0.780282	0.714912	0.0385222	1.2559	0.271857	-0.791143	-0.859357	-0.678701	1.5878	1.46146	0.370259	-0.230298	-0.707944	2.59449
A_23_P147046	EPHA3	chr3	p11.1	-0.860804	0.620446	-0.109918	-0.856498	-0.946268	-0.98987	-1.00633	-1.08591	-0.972532	-0.885634	-0.912401	-0.41107	-1.25241	-0.641823	-0.485157	-0.200204	-0.688604	-0.262382	-1.28908	-0.348127	-0.451996	-0.880267	-0.860804	-1.01368	0.135059	-0.952644	1.30981	-0.874128	2.16059	1.96061	1.83648	0.786064	0.707083	0.594977	1.79066	0.388331	2.80373	1.81443	0.694145	-0.802708	-0.214719	-1.22131	1.30036	-0.922825	0.0620651	1.01311
A_23_P142070	TSPAN16	chr19	p13.2	-0.866653	0.245268	0.0689016	0.0885238	0.403378	-0.789894	-1.25878	-1.10939	0.0034348	-0.284062	-0.015977	-0.310465	-1.27765	-1.68565	-1.22119	-1.41256	-1.4854	-0.967102	-0.866653	-0.778923	-1.2501	-1.84117	-1.84171	0.0689016	0.132412	-0.221539	0.122904	0.304726	-0.155776	-0.29819	0.77593	0.124217	0.922327	-0.210808	0.83075	0.0722134	-0.900963	0.282635	-0.388161	5.275	0.167117	-0.179177	1.02697	1.35021	0.683365	0.205827
A_23_P34366	HTR1D	chr1	p36.12	-0.866705	0.40742	-0.0785024	-0.858902	-0.398996	-0.874514	-0.994431	-0.866705	0.47637	-0.928079	0.00604579	-0.2315	-1.20391	-0.929419	-1.62272	-0.460985	-1.40297	-0.788869	-1.2803	-0.786449	-1.19103	-0.919725	-0.831676	-0.0785024	-0.993456	-0.254662	-0.775476	-0.321132	2.64448	0.622158	0.705564	1.34035	0.517792	2.29168	1.36017	0.749222	-0.448087	0.125893	1.56427	-0.596112	1.28729	1.0292	0.16318	-0.6374	0.964172	0.394704
A_32_P126375	NHS	chrX	p22.13	-0.866815	0.626356	-0.350424	-0.451095	-1.3298	-1.04435	-0.540229	-0.977201	0.461522	-0.188485	-0.755358	0.019816	0.0344423	-0.555073	-0.866815	-1.26001	-1.39167	-0.982076	-1.03341	-1.63188	-0.392913	-1.30618	-1.77759	-1.15964	-0.235932	0.299586	-0.603082	-1.2579	0.0905585	1.01061	1.18135	0.347721	0.360134	1.25163	0.762834	1.0324	2.9493	0.83358	-0.394145	-1.63287	3.05475	1.1165	0.633549	0.707905	-0.119274	0.199476
A_23_P302060	IFNE	chr9	p21.3	-0.86927	0.379856	0.35754	0.317181	0.171259	-2.48706	-2.36203	-2.2232	-0.198299	-0.165396	1.70971	-0.768336	-2.02857	-1.20377	-1.22124	-2.09287	-1.20971	-0.683055	-1.62157	-1.16874	-1.68841	-0.21606	-0.86927	0.187354	-0.114416	0.478691	-0.0186654	0.167367	-0.136043	0.723385	-0.332075	-0.688054	0.517178	0.407204	-0.669106	1.33492	0.27697	0.38039	1.3972	-0.40812	1.64769	-0.742696	0.626942	-0.127254	0.848007	0.254343
A_32_P195515	IQSEC3	chr12	p13.33	-0.870632	0.176911	0.222658	-0.292857	-0.796866	-1.3428	-1.78239	-0.879313	0.773763	0.537773	0.93781	-1.20675	-1.6881	-0.889124	-1.50334	-0.483956	-1.76175	-1.0534	-0.870632	-1.15734	-0.972236	-0.623721	-0.724182	0.440301	-0.72309	0.110923	-0.176529	-0.2868	0.317319	-0.445414	-0.0970547	1.04116	-0.00990153	0.1927	2.29227	-0.347671	-0.469203	0.904086	-0.357043	0.264093	0.620835	1.13163	-0.131647	0.245132	-0.147277	-0.708517
A_23_P34376	TCEA3	chr1	p36.12	-0.872312	0.63107	-0.279486	-0.976303	-0.872312	-0.394853	-0.996607	-0.846598	-1.024	-1.09913	-0.799087	0.160229	-0.5165	-0.577397	-0.812813	-1.08709	-0.461077	-0.919677	-1.22336	-1.04745	-0.556629	-0.157119	-1.00082	-0.556646	-0.127132	0.392991	-1.16496	-1.00269	0.40956	0.656492	1.04966	-0.801212	-0.333508	1.02231	-1.12788	0.867044	1.85283	0.422917	2.75093	1.53497	-1.06898	-1.20458	2.05097	0.245261	-0.989207	1.11576
A_23_P152876	RAB34	chr17	q11.2	-0.872599	0.787664	0.0816425	-0.900671	-0.976083	-0.821242	-0.66251	-0.872599	-0.924061	0.0548659	-0.278002	-0.0464805	-0.652141	-0.938401	-1.01725	-1.77366	-1.04874	-0.728754	-0.818579	-1.29025	-0.723947	-0.489352	-1.39983	-0.945716	-0.472973	-0.119429	-1.20787	-1.26255	1.05836	0.995517	1.32315	0.440034	-0.227995	0.338035	1.35296	1.11624	0.636709	1.8226	0.0885479	-0.238961	0.444213	1.12783	1.46341	0.786047	1.61506	1.38512
A_24_P17031	PTHLH	chr12	p11.22	-0.873049	0.525895	-0.191474	-0.567244	-0.823441	-0.951648	-1.07576	-1.00508	-0.445594	-0.87675	-0.770615	-1.08153	-0.837383	-0.760832	-0.556651	-0.773585	-0.873049	-0.947726	-0.927994	-1.19475	-0.936645	-1.01924	-1.27597	-0.586931	-0.522072	-0.837354	-0.771822	-0.733924	-0.169873	-0.48582	-0.0489819	0.990246	1.741	1.03679	0.180781	0.746007	0.318674	-0.190711	1.14097	0.97389	0.747796	2.10234	3.04675	-0.381251	-5.99706797388005e-05	0.236678
A_24_P286079	AFF4	chr5	q31.1	-0.873918	0.848325	0.296715	-0.623212	-1.13068	-1.03125	-1.01912	-1.57484	0.802396	0.614441	1.31779	-1.07526	-0.873918	0.0987971	-0.724618	0.563975	-0.818368	-1.19701	-1.51601	-0.819179	-1.10375	-1.33704	-1.67237	0.985192	-0.499946	-1.12593	0.285133	0.175462	1.03323	1.17906	1.15446	-1.09348	1.05977	0.898623	1.01669	0.964815	0.516892	0.7386	0.484515	-2.00641	1.07283	1.32718	1.37621	1.30537	1.06805	0.610308
A_23_P164958	CCDC8	chr19	q13.32	-0.876196	0.671712	-0.1457	-0.751546	-0.876196	-0.940458	-0.61751	-0.901119	-1.02892	-1.01897	-0.277253	-0.584814	-0.738584	-0.763121	1.4353	-1.27581	-0.797227	-0.575898	-0.722654	-1.01108	-0.870094	0.391626	-1.05998	-0.931341	-1.13683	-1.14058	-1.01783	-1.13052	1.16865	1.21488	1.4924	-0.669388	0.548524	0.325695	-0.0358906	0.992755	0.296467	1.1877	1.19057	1.73475	1.42745	-0.15298	-1.34715	1.43466	0.624444	0.328844
A_23_P109133	AVP	chr20	p13	-0.876222	0.426043	0.0844294	-0.0314628	-0.876222	-1.91962	-0.0112612	0.997719	0.221196	0.142737	1.29272	-1.08753	0.678559	0.0454609	-0.789022	-1.00282	-2.21145	-2.58478	-0.232547	-1.5002	-1.16522	-1.2229	-0.980534	-0.419646	-0.212034	-0.975908	-1.04461	-0.336635	1.5903	0.0231314	0.162501	2.46415	-0.432715	-0.12422	0.531808	1.20277	-1.41668	-0.624174	1.87924	1.32068	-0.464379	0.0844294	0.494768	0.853726	-0.12389	1.36996
A_23_P134887	PREX2	chr8	q13.2	-0.877318	0.530205	0.18834	0.195844	-0.429234	-2.39384	-1.5226	-0.12771	-1.59749	0.835519	1.02101	-0.934796	-1.5207	-0.877318	-1.7162	-0.653065	-1.73642	-1.02138	-1.63503	-0.286336	-1.59227	-0.669527	0.455821	0.973751	-0.372469	-0.895386	0.182886	-0.150932	1.16165	0.0419525	-0.912934	1.66474	-0.0826047	0.00214434	1.62675	-0.862253	-0.599163	1.15283	-0.0103748	1.63522	-0.178964	0.602837	0.89354	-0.338575	0.422972	0.52152
A_23_P338542	SLC5A8	chr12	q23.1	-0.883053	-0.00825221	0.241597	-0.279508	-0.00318735	-1.77387	-0.643496	-1.18599	-0.0242691	-0.212279	-0.145522	-0.819882	-1.32759	-1.10144	-1.20797	-0.844023	-1.36267	-1.48009	-1.12683	-0.968072	-1.28577	-1.07132	-0.883053	-0.269829	-0.170344	0.511924	-0.197619	-0.348952	-0.343711	-0.263115	-0.216311	-0.251746	0.569464	-0.213614	1.0815	-0.315916	0.527447	-0.0517898	-0.047494	0.0352854	0.0161539	-0.00293908	0.269443	-0.0779726	0.479692	-0.545252
A_24_P942798	TANC2	chr17	q23.2	-0.883336	0.814799	0.361187	-1.02843	-0.941946	-0.887824	-0.995862	-0.871793	-0.883336	-0.837613	0.742008	-1.01702	-0.984739	-0.952365	-0.865447	-0.764814	-0.955152	-0.998652	-1.09947	-0.960429	-0.873625	-0.790128	-0.880317	-1.03173	0.677425	0.778806	1.33236	0.9707	0.899208	1.54	1.8209	0.726192	1.18391	-0.77419	0.997114	1.36859	-0.656983	-0.90297	-1.82276	1.10712	0.779685	-0.964739	0.815357	-0.869846	-0.746831	0.677965
A_32_P210572	C1orf53	chr1	q31.3	-0.88363	0.579511	-0.492855	-0.718011	-0.571782	-1.25515	-0.718187	-0.31992	-0.258496	-0.101293	-0.492855	-0.88363	-1.23323	-1.04281	1.61368	-1.11828	-0.656017	-0.972389	-1.40255	-1.25139	-0.987116	-1.34735	-0.429929	-0.774021	-1.5194	-1.53426	-0.86849	0.429691	0.573565	0.0685848	0.575881	0.905042	0.571878	0.319231	0.319858	1.20405	0.59771	1.53549	2.14697	2.38484	0.0746862	0.0338262	0.526126	1.09996	0.813418	0.903499
A_23_P115091	RAB25	chr1	q22	-0.887699	0.147528	0.181349	-0.616127	0.00887443	-0.594549	-1.59161	-0.559088	-0.678879	-0.965563	-0.294447	-1.11905	-1.02599	-1.17804	-0.887699	-0.212183	-1.03503	-1.57291	-0.779195	-0.978985	-1.12482	-1.38849	-1.11484	1.45552	-0.0339678	-0.120773	1.18916	-0.544542	-0.261192	-0.143849	1.64311	-0.677719	0.503976	0.565087	0.248413	-0.635867	2.32303	0.725353	0.181349	-0.473236	2.57015	0.144177	0.518264	-0.388968	-0.670576	-0.262383
A_24_P933372	GOLPH3	chr5	p13.3	-0.88813	0.157777	0.151062	0.587981	-1.06484	0.223676	-1.15938	-1.85014	0.643272	0.780179	0.0834249	-1.15595	-1.08218	-1.31026	-0.524907	-0.746488	-1.24216	-0.779768	-1.21169	-0.395792	-1.20626	-1.40987	-1.35113	-0.133945	-0.88813	-0.636999	-0.641258	0.730585	0.397599	0.0659917	1.02071	0.527438	1.91762	1.32401	0.40306	0.828059	0.871156	0.249563	0.670973	-1.24861	1.82675	2.19768	2.14852	2.22594	1.29114	-0.841676
A_23_P85188	ARMCX5	chrX	q22.1	-0.889042	0.647296	-0.0707461	-1.62077	-0.889042	-1.42392	-1.61043	-0.49544	-1.40426	-0.494548	0.721053	-1.73217	-0.931843	-1.45917	-0.782896	-1.59786	-1.06457	-0.338956	0.0830801	1.12911	-0.837349	-0.640901	-0.98998	-0.607222	-0.456119	-1.54138	-0.61324	0.185379	-0.0205952	0.962729	1.22148	-0.207556	0.878181	0.509247	1.84888	0.0788988	-0.631831	0.64816	1.33173	0.662026	0.486191	-0.396289	1.30624	0.772819	0.403769	-0.250607
A_24_P192933	UBASH3B	chr11	q24.1	-0.890367	0.424958	0.392333	-0.396673	-0.165488	-1.23319	-1.06186	-0.890367	0.972473	0.393937	1.07407	0.286771	-0.255742	-1.38038	-1.2551	-1.19144	-1.31443	-0.13185	-0.752209	-0.423829	-0.759575	-1.66693	-1.10566	1.19004	-1.23787	-0.878301	-1.24865	-1.14198	1.40182	1.00916	1.20133	-0.027759	0.227899	0.327797	1.08187	-0.567814	-0.683934	0.421924	-1.5035	-1.01015	3.9431	0.920098	-0.960949	-0.118304	0.467295	1.0118
A_23_P89101	SEPT12	chr16	p13.3	-0.891493	0.184451	0.133758	0.506111	-0.365482	-1.24228	-1.65981	-2.06276	-0.471317	-0.447049	-0.592776	-1.72189	-1.64907	-1.92452	-1.25939	1.96098	-1.24365	-1.2844	-1.91806	-1.60651	-0.891493	-0.696157	-0.769025	0.308456	0.646711	0.429424	1.09148	1.07368	-0.486572	0.13843	0.65927	-0.86341	0.540863	0.807965	0.375619	1.60321	-0.257641	-0.316185	0.910331	-0.0609738	-0.129606	-0.193526	0.230472	2.41433	0.109901	-0.0763688
A_23_P429601	GALNTL5	chr7	q36.1	-0.892368	0.0399174	-0.149404	-0.178037	-0.273992	-0.985887	-1.04738	-1.22906	0.209623	0.0412159	-0.0471087	-0.790062	-0.908813	-0.908298	-0.892368	-0.923023	-0.965907	-0.95738	-1.07756	-0.979332	-0.955983	-0.628006	-0.841184	-0.149404	-0.275348	-0.248211	-0.440989	-0.332728	-0.0349473	-0.295127	-0.2718	0.263149	0.0672194	-0.011014	0.344074	0.325137	-0.379835	-0.057666	-0.216312	1.09928	0.0134636	0.101909	0.223784	-0.0661914	-0.165406	-0.209035
A_23_P428139	EFNB2	chr13	q33.3	-0.894596	0.692476	0.268593	-0.929169	-1.29143	-1.3619	-0.756288	-1.29715	-0.27969	-0.884339	-0.388233	0.133404	-0.286617	-0.0952035	-0.421511	-0.894596	-1.30014	-0.18776	-0.783805	-0.610319	-1.40245	-1.52614	-0.962947	-1.09571	-1.0117	-0.705395	-1.33029	-0.933712	1.14834	1.39485	2.00897	-0.572301	0.430187	0.87373	1.82144	1.61371	0.926089	0.658205	-0.243718	-1.26946	-0.138838	2.00709	0.849368	1.86223	2.33	0.49741
A_23_P253597	LRRC3	chr21	q22.3	-0.902386	0.119401	0.128314	0.31168	1.09688	-0.902386	-1.70655	0.812142	0.488105	1.03064	0.84401	-0.560907	-2.16031	-1.59308	-1.57444	-1.27763	-1.44852	-2.29656	-2.06096	-2.22188	-0.886845	-1.14378	-1.13989	0.212263	0.351608	0.481869	0.847942	-0.357731	0.654528	-0.273357	0.20911	0.842544	-0.506475	0.102294	1.02073	1.5351	-0.556399	0.0679047	0.862724	-0.687206	1.32537	0.946966	0.101819	2.224	1.57465	0.300242
A_24_P120827	HGSNAT	chr8	p11.21	-0.903334	0.692675	-0.384698	-0.774388	0.387573	-1.09491	-0.794407	0.0336894	0.545361	0.463469	0.639256	1.00944	-0.98518	0.560572	-1.07396	-1.17508	-1.39113	-0.510718	-1.17083	-1.06928	-1.43915	0.218308	0.375225	-0.384698	-1.30037	-0.917184	-1.55025	-0.903334	0.763874	-1.83575	-1.61232	-0.32083	0.867209	0.744815	0.802555	-0.851237	-0.923682	0.9914	-0.962738	0.0733873	0.509884	2.96598	1.09449	1.43118	0.540624	-0.778391
A_23_P134237	RARRES2	chr7	q36.1	-0.904315	0.492814	0.437431	-1.28308	-0.827185	-1.13061	-1.29945	-0.845166	-1.14297	-0.807055	-0.282435	-0.971694	-0.280203	-0.378866	-0.904315	-1.57693	-0.762096	0.00259176	-0.931123	-1.38565	0.946499	-1.12483	0.0260042	-0.706249	1.14515	1.10886	-1.19401	-1.30675	1.27299	0.979429	0.794651	0.445694	0.384614	-0.757866	-1.77449	0.425312	1.91442	1.30106	1.70738	2.08243	-0.957706	-1.00939	0.750018	0.366644	0.976282	-0.0559016
A_23_P103971	CYP4Z1	chr1	p33	-0.905421	-0.0473072	-0.0671109	0.110642	-0.321904	-1.11017	-0.214251	-1.34491	-0.528093	-0.239267	-0.470396	-1.40994	-1.47401	-0.733271	-1.50915	-1.01707	-1.22332	-1.23252	-1.2457	-1.17	-0.905421	-1.23286	-0.623787	-0.178543	0.116387	0.2378	-0.382489	-0.555235	-0.306126	-0.10572	-0.227011	-0.356382	0.0562866	-0.413251	-0.228912	-0.43686	1.2575	-0.119569	-0.447675	1.12413	-0.0671109	-0.241443	-0.247433	-0.0356133	-0.0741126	0.0977948
A_24_P85478	ARIH1	chr15	q24.1	-0.908527	0.694163	-0.321629	-1.00267	-0.452555	-0.777749	-1.07278	0.869614	-0.634855	-0.504814	0.782862	-0.908527	-1.74061	-0.916988	-1.16888	0.523204	-0.955593	-0.912635	-1.08672	-1.09268	-0.41994	-1.62804	-0.77862	-1.17627	-0.86039	-0.649888	-0.957702	-0.658887	1.1546	1.11761	1.64823	0.216154	1.09821	1.3704	1.56805	0.835634	1.24021	1.28422	-1.19423	-1.06102	1.57214	1.4552	1.65972	1.62932	0.752217	0.568977
A_23_P205428	FOXG1	chr14	q12	-0.911911	1.19133	-0.74119	-1.02413	-0.996558	-0.894083	-0.927354	-1.1177	-0.949948	-1.04587	-0.9498	-0.914346	-0.789092	-0.859752	-0.899741	-0.870704	-0.855642	-0.911911	-0.0567485	-0.633077	-0.85998	-0.885473	-0.88151	-1.00864	-1.00934	-1.04398	-0.996144	-0.948214	1.55371	1.34392	1.39922	1.41715	1.60722	1.67109	1.6761	1.23962	1.70397	0.389875	0.150966	0.793793	-0.252725	-0.622553	-0.503945	0.0175295	-0.42981	1.19938
A_23_P253896	NPNT	chr4	q24	-0.92069	0.834921	0.0840532	-0.68538	-1.11635	-0.92069	-0.0301367	0.215778	-0.933493	0.00948433	-1.07037	-0.512373	0.0209124	-0.99759	-0.955913	-0.39792	-0.939277	-1.05072	-0.84898	-0.962936	-0.888838	-1.11105	-0.731154	-1.20555	-1.41425	-1.24097	-0.630363	-1.08002	1.63247	1.94723	1.90086	0.548012	1.28933	0.704254	1.65612	1.42615	0.483438	-0.850355	-0.730258	-0.530577	-0.0699301	0.212785	1.01715	-0.845391	-0.776156	1.15143
A_23_P99515	C13orf33	chr13	q12.3	-0.922651	0.320148	0.301436	-0.864204	-1.03501	-0.592298	-1.10824	-0.165394	2.67114	1.13503	1.17761	-0.536743	-0.737996	-1.20063	-1.49577	-1.49253	-1.15984	-1.02035	-1.37354	-1.24983	-1.28052	-0.922651	-1.18612	-0.639717	-0.750454	-0.636987	-0.696653	-0.795235	1.07055	0.761189	0.515571	-0.554587	-0.354213	-0.670213	-0.448688	-0.174613	-0.00394944	2.4001	1.15934	-0.247926	0.0486383	-0.807991	-0.843946	0.338502	-0.484604	0.895792
A_24_P521409	RPS6KB1	chr17	q23.1	-0.928829	0.579617	0.377084	-1.61218	-1.66642	-0.677224	-1.39489	-1.24375	0.3168	-1.21753	0.123085	-1.45824	-1.08027	-0.928829	-1.08562	0.609262	-0.617736	-1.63016	-1.04934	-0.900841	-1.41171	-0.741932	0.0713104	-0.834011	0.27379	0.0705688	0.432244	-0.602091	0.272549	1.21222	0.470625	1.03732	0.553442	0.384165	2.7065	1.25641	0.724517	1.61101	-1.2031	-1.88063	0.669695	-0.949187	0.994318	1.08051	0.605792	0.699949
A_23_P150979	MUCL1	chr12	q13.2	-0.932067	0.213262	0.0253507	-0.0642485	-0.470666	-1.02529	-1.62952	-1.62305	1.55551	0.561419	-0.0704367	-0.323338	-0.75573	-1.31601	-0.945652	-0.932067	-1.82425	-1.34137	-0.916962	-1.14073	-1.53471	-1.13374	-1.9874	-0.648822	-0.147718	0.517177	1.2351	0.265546	0.546706	0.199649	1.1561	0.298751	2.30169	-0.0154016	2.07682	0.618248	0.955045	-0.716495	1.11923	1.12207	1.60965	-0.932798	0.500817	0.808514	-0.190857	-0.575114
A_23_P78061	LHX1	chr17	q12	-0.938393	0.486879	0.231963	-0.0702373	-0.275796	-1.4513	-1.55699	-0.231596	0.227541	-0.331138	0.127632	-0.930554	-1.41266	-0.292522	-1.63164	-1.34115	-1.4645	-1.4816	-1.71079	-1.0802	-1.53826	-1.14404	-0.874758	0.636318	0.584342	-0.414313	-0.938393	1.34593	0.271063	-0.52006	-1.09987	1.68003	-0.320054	0.0485804	-0.406555	0.956681	-0.674437	0.227363	0.931492	1.27346	-0.356992	4.16284	0.213833	0.0508762	0.532572	1.00508
A_23_P312752	KCNJ13	chr2	q37.1	-0.939718	0.0874877	0.126414	0.153919	0.0861474	-1.30536	-0.950263	-1.28024	0.225399	-0.353048	0.058643	-1.0411	-1.30488	-0.889272	-1.31312	-1.09194	-1.08178	-1.06733	-1.01628	-0.938224	-0.994889	-0.743042	-0.939718	0.283297	-0.163634	0.20183	0.183887	0.367667	0.0980504	0.35804	0.201279	3.28398	0.0846738	-0.143296	-0.528955	0.210825	5.95758	1.35385	-0.087274	-0.295843	0.663481	-0.314621	0.535334	0.229116	-0.0576005	0.750059
A_23_P418556	ELOVL2	chr6	p24.2	-0.941363	0.912794	-0.312157	-0.56972	-0.99696	-0.970802	-0.734541	-0.646429	-0.941363	-1.06932	-0.414525	-0.70615	-0.808196	-1.04173	-0.902867	-1.02921	-0.986552	-0.763791	-0.623555	-0.969272	-0.954058	-0.782384	-0.864341	-0.625532	-1.01882	-0.917732	-1.08438	-0.955222	2.37618	1.50444	1.39863	0.974692	1.50152	0.477812	1.2102	1.2977	1.14435	0.515276	-0.60778	0.342226	1.14453	1.2705	-0.950009	0.693271	0.076262	1.68566
A_23_P115407	GSTM1	chr1	p13.3	-0.941372	-0.228867	0.0595197	0.0106927	-1.0491	-1.01914	-0.740271	-0.514044	-0.941372	-0.956004	-0.505677	-1.049	-0.663047	0.46642	-1.09128	-1.32139	0.358365	0.737846	-0.850675	-1.28195	0.683169	-1.08292	-1.44442	0.263905	-0.409274	-1.06324	-0.947726	-0.226529	-0.519747	-0.242056	0.421128	1.19975	-0.789882	0.655895	-1.00468	-0.215678	0.854053	1.22128	-0.695249	1.31862	0.66289	-0.626974	-0.689998	-0.494695	-0.283209	-0.162198
A_24_P359838	TTL	chr2	q13	-0.942901	0.356473	0.353503	-0.778949	0.152615	-1.84859	-1.34012	-0.593224	-0.138629	0.438315	0.470885	-0.732301	-0.942901	-0.792172	-1.65173	0.539	-1.00704	1.16909	-1.16603	0.239248	-1.29403	-1.29621	-1.1572	0.454623	-1.57605	-0.938465	-1.31562	-1.00166	0.108334	-0.59224	1.17991	-0.120584	1.2184	0.959302	1.78668	1.70634	0.593306	1.72007	2.10721	1.29068	0.144553	2.46755	-1.13197	0.0612986	0.375219	-1.09027
A_23_P89267	CYB5D1	chr17	p13.1	-0.946342	0.426668	-0.0274349	-0.413031	0.202003	-0.771148	-0.673502	-0.959374	0.566303	0.814268	0.654845	0.147888	-1.0032	-1.93368	-1.06183	-1.09262	-1.36626	-1.29081	-1.04694	-0.946342	-0.785255	0.28573	-1.30457	-0.0010531	-1.18301	-0.993504	-0.148945	-0.427305	0.408692	-0.148771	-0.0491689	0.657253	-0.334212	0.745253	3.79895	-0.549883	-0.836255	1.04365	1.29357	0.906005	0.610192	0.613423	2.1085	2.81594	1.37381	-0.17101
A_23_P31064	MOXD1	chr6	q23.2	-0.949093	0.589549	0.00942425	-1.2766	-1.17873	-1.09779	-0.923584	-1.33109	-0.173942	-0.89256	-1.13232	0.152846	-0.0346072	-0.570042	-1.06827	-1.07063	-0.949093	-1.23358	-0.548589	-1.18373	0.576137	0.0117154	-1.01562	0.243588	-0.390129	-0.128836	-1.03614	-1.29025	2.32536	2.11634	2.17128	2.19447	1.92803	1.17784	1.98117	0.491824	0.195378	2.06829	-0.383593	-0.204703	0.0238038	0.00942425	-1.0145	-0.700324	0.1191	0.694406
A_24_P217234	SLC3A1	chr2	p21	-0.953392	0.557618	0.0747891	0.183978	0.7125	-1.659	-2.57173	-1.8709	0.272991	0.377556	0.0747891	-1.56691	-0.615019	-1.46012	-1.89173	-0.438165	-1.34747	-1.33782	-1.82148	-1.51166	-0.415919	-1.38913	-0.953392	1.00994	-0.190974	0.797066	-0.343519	0.286728	-0.676693	0.376412	1.25095	0.94439	0.0831757	0.278135	2.16776	1.06524	-0.550701	-0.158473	0.427355	0.953543	0.0190043	0.700899	1.25508	0.0743485	1.17778	0.150928
A_23_P116587	OMP	chr11	q13.5	-0.954094	0.481774	0.196782	0.144283	-0.311747	-0.954094	-1.58788	-0.865787	-0.339278	-0.124183	-0.0259113	-1.49668	-1.11026	-1.32641	-0.304035	-1.55305	-0.380755	-1.65154	-1.20929	-1.03759	-1.22774	-1.78227	-1.16316	-0.913952	1.61226	-0.27828	-0.30743	1.32034	0.516822	0.76187	0.279197	1.04233	-0.195064	-0.558399	0.809616	1.02011	-0.955825	-0.147175	2.50499	2.23542	0.187218	2.02976	0.194981	1.32499	1.12605	0.894853
A_24_P410737	SLAIN2	chr4	p11	-0.955861	0.362879	0.252747	-0.959369	-0.045555	-0.127468	-0.921594	-1.37806	0.599325	0.661374	0.233404	0.0660666	-1.36627	-1.04526	-1.28016	0.305575	-0.992771	-0.0630676	-0.955861	-0.891015	-1.1783	-0.787567	-1.13767	-0.759738	0.463087	-1.41569	-1.76223	-1.30383	0.935033	1.30312	2.60161	0.174403	1.396	0.285509	1.76328	0.370337	1.31664	1.25344	-1.41638	-1.44136	1.61367	0.868362	1.6602	-1.35451	0.905134	0.350901
A_23_P311585	KRTAP9-9	chr17	q21.2	-0.958467	0.0372875	-0.12384	-0.957842	0.543382	-0.824587	-1.54354	-0.685565	-0.627098	0.6439	1.54744	-1.20297	-1.72394	-1.0962	-1.33016	1.64774	-1.58138	-0.968324	-1.30394	-1.18695	-0.958467	-1.12684	-1.08456	-0.316426	-0.483867	-0.102955	-0.618082	-0.0425644	1.12306	-0.0461094	-0.764805	0.687781	-0.402536	1.06132	2.25041	3.7527	-0.221599	-0.515112	0.0108071	0.920591	0.926304	1.52482	-0.137634	-0.289888	-0.317867	-0.494141
A_23_P46429	CYR61	chr1	p22.3	-0.959078	0.319429	0.60002	-0.291074	-1.16188	-0.959078	0.525913	0.511721	0.291957	0.87674	1.45533	0.57121	-0.925869	-0.963906	-1.7685	-1.49142	-1.24807	-0.98619	-0.194112	-1.09581	-1.14313	-1.06958	-0.877707	0.60002	0.0522931	-1.43853	-1.895	-0.851091	0.123939	0.154329	0.640077	0.0413578	0.311446	0.0849697	1.35546	1.68366	-0.937318	0.602469	0.881993	0.769721	1.15823	-0.0492996	-0.704357	0.571904	-1.2649	-0.536773
A_24_P254965	HDAC8	chrX	q13.1	-0.960859	0.406761	0.18187	-0.0621646	-1.10127	-0.638366	-0.960859	0.180667	-0.379474	-1.09612	-0.442052	-1.38635	0.547124	-1.33456	-0.629197	-1.46544	-1.46556	-0.121695	-0.37326	0.474802	-0.890939	-1.25619	-1.53772	-0.39942	-1.04284	-1.17416	-1.10912	-0.86811	0.0523985	1.55028	0.0692271	-1.09843	0.630293	0.733164	1.56724	0.0754625	0.740312	1.17048	1.8187	-0.227496	0.884201	-1.38409	-0.443293	0.39989	0.320038	1.05915
A_32_P124708	ONECUT2	chr18	q21.31	-0.962518	0.851926	-0.396544	-0.674294	-0.463843	-1.07366	-0.962518	-1.1008	-0.570598	-0.668264	-0.673954	-1.1467	-1.05441	-0.857216	-1.0815	0.0376788	-0.917566	-1.07542	-0.96805	-1.06285	-1.08481	-1.06799	-1.02854	-0.160015	-0.575414	-0.529769	-0.58464	-0.613284	1.25021	1.78588	1.25134	0.681604	2.31868	1.06045	1.86958	1.31027	0.0335335	1.07594	1.51523	0.176943	1.2184	2.4685	3.01307	-0.488497	1.58046	-0.503897
A_24_P417460	SFMBT2	chr10	p14	-0.962679	0.402699	0.375621	0.144678	0.233806	-0.962679	-1.50017	-1.86769	-0.973587	-0.659168	0.0672881	-1.90866	-1.29454	-0.313049	-0.194971	-1.34751	-0.27963	0.0400701	-1.79635	-1.5269	-0.927184	-1.18321	-1.90397	-0.537852	-0.98157	-0.175578	0.402304	0.43047	-0.426003	0.548566	1.11905	-0.525695	1.03462	1.53889	0.480443	1.0572	0.749611	-0.493044	0.301667	-0.62625	-0.240645	2.53795	1.79084	0.899943	2.43763	0.173835
A_23_P86774	NDUFS8	chr11	q13.2	-0.963956	0.472727	0.364108	-0.282943	-1.14236	-1.4215	-1.74478	-1.25832	-0.2198	-1.57939	-1.5426	-0.396833	-0.425821	-1.45845	-1.16831	-0.827266	-0.549965	-1.29371	-1.6461	0.420029	-1.07583	0.362196	-0.963956	1.27152	-0.980226	0.093993	-0.0407287	-0.317698	0.380597	-0.577989	-0.459183	1.94833	0.488265	0.587313	0.457189	-1.03719	0.931629	1.99829	0.0487006	0.344442	0.385667	-1.51494	1.46833	-0.77898	0.859095	0.650919
A_23_P59772	CLCN1	chr7	q34	-0.968377	0.377403	0.328209	-0.408558	-1.05165	0.493925	-1.92772	0.209136	-0.041772	-0.968377	0.331423	-0.0525193	-1.32131	-1.38191	0.259484	-1.65254	-1.44527	-1.61107	-1.35392	-0.44176	-0.0470212	-1.06304	-1.48527	-1.21732	0.571359	-1.53669	-0.960343	0.752754	0.695354	0.427861	0.281648	2.31581	0.272001	-0.134139	-0.0766401	0.917431	-0.653589	-0.225631	0.333424	0.258093	0.190403	0.778142	0.319559	0.154772	1.00772	1.52744
A_23_P74042	LPHN2	chr1	p31.1	-0.977126	0.427861	0.268266	-0.319785	-0.980988	-1.04028	0.0283682	-0.308146	0.652024	-0.977126	0.871001	-1.13955	0.0435516	-0.424559	-1.1995	-1.37748	-1.60125	-0.559602	0.418517	-0.347386	-0.316077	-1.2897	0.246222	-1.45132	-1.18169	-1.04316	-1.26922	-1.1026	1.1103	1.06956	0.812463	-1.23441	0.144616	0.939021	-0.0396661	0.969585	1.04077	2.04367	0.479823	-0.13917	2.79681	1.19678	1.64572	0.421838	-1.27764	0.354169
A_23_P209449	FZD7	chr2	q33.1	-0.98434	0.732956	-0.294704	0.301234	-1.07376	-1.30609	-1.0993	-1.13759	-1.24294	-1.22143	-0.82875	-0.268279	-0.98434	-0.427302	-1.06895	0.319738	-0.859086	-0.156602	-0.918917	-0.83608	-0.878765	-0.801061	-0.660465	0.810456	-1.19844	-1.21354	-1.32315	-1.35071	2.17542	1.36175	1.99595	1.64213	0.843481	1.27814	1.71516	1.48446	0.206793	1.46017	0.952369	0.247294	0.820085	1.8132	1.36462	1.63602	1.7708	-0.35198
A_23_P44768	TBK1	chr12	q14.2	-0.986074	0.533535	0.49179	-1.01936	-1.15314	-0.549279	-1.05694	-1.52012	1.03152	0.620619	0.49179	-0.377278	-0.996326	-1.11497	-1.32745	-0.986074	-0.777442	0.300337	-0.721683	-0.802905	-1.07225	0.0743184	-1.34436	-0.619511	-0.885329	-1.01313	0.584816	-1.41875	0.536164	1.22375	1.57229	-0.777639	1.00793	0.636378	0.530905	-1.57596	1.14816	0.667194	0.65096	-1.30843	-1.41878	0.925999	2.09284	1.47402	1.89791	0.280752
A_23_P38206	LSMD1	chr17	p13.1	-0.990085	0.480031	0.0712863	0.25098	-1.01137	-1.08293	-1.07912	-0.695134	-0.0742122	-0.0357984	-1.09482	-1.0714	0.161884	-1.121	-0.990085	-1.20012	-1.38865	-0.84441	-1.1562	0.221345	-1.19551	0.402535	-1.89272	-0.0996734	-0.949002	-1.48524	0.919737	0.670765	0.505305	0.572737	1.31317	0.28293	2.88064	0.915557	1.39672	-1.62232	1.24686	0.7989	0.848496	-1.17215	1.2517	1.07791	1.57536	2.43179	0.2379	0.162099
A_23_P406458	C11orf36	chr11	p15.4	-0.994667	0.135399	0.387854	-0.502635	0.405467	-1.57705	-1.47819	-0.532802	-0.0199626	-0.00851487	0.779798	-1.33186	-1.12203	-1.33766	-1.82326	-0.788887	-1.78847	-1.11598	-1.72982	1.57775	-1.79499	-0.994667	-0.99889	-0.0719603	-0.211446	-0.0196197	-0.706229	-0.118397	0.832735	0.0751523	-0.663074	0.0878352	-0.237409	-0.489451	2.70349	2.25876	-0.379325	0.928046	-0.452492	-0.113824	0.387854	0.986211	0.416758	0.64471	-0.323581	-0.132084
A_24_P323944	PHTF2	chr7	q11.23	-0.999623	0.592958	0.125165	-1.3825	-1.38809	-1.4171	-1.18163	-1.36814	0.159275	-0.443161	0.801479	-0.0870331	-2.0089	-2.06081	-1.07134	-0.232641	-1.57141	-0.04345	-0.0815199	0.684692	-1.41326	-0.999623	-0.124611	1.76451	-0.371497	-0.507278	0.0397217	-1.24898	0.701261	0.716736	0.484655	-0.870878	0.200385	0.758538	1.27928	-0.58543	1.15472	2.22994	0.535377	-0.16945	0.906216	1.98356	1.92386	0.761997	1.10037	-1.16529
A_23_P159865	UPRT	chrX	q13.3	-1.00351	0.503212	-0.328147	-1.09865	-1.2921	-1.05175	-0.572846	0.256378	0.036468	-1.34249	-0.0421916	0.0637284	-1.00351	-0.756954	-1.13866	0.3965	-1.31597	-1.00151	0.256938	-0.455079	0.099009	0.19728	-1.01932	-1.2256	-1.1038	-1.48417	-1.81382	-1.66671	0.278901	0.823192	0.286208	2.2529	1.26332	0.657004	2.05734	0.617752	0.180672	0.306932	-0.419922	0.293732	0.540063	-0.328147	0.582936	0.20696	0.208837	0.702873
A_23_P94762	ZNF354B	chr5	q35.3	-1.00701	0.589075	0.136462	0.446225	-0.296342	-0.725425	-1.16033	-1.00701	0.2316	0.524509	0.671704	-0.427983	-1.81602	-1.59795	-1.50911	0.426719	-1.84269	-1.30369	-0.582	-1.33193	-1.73462	-1.31205	-1.06048	0.880116	-0.824559	-1.04586	0.0566439	0.415476	1.40395	0.5059	0.623598	-0.221333	0.133227	1.67796	1.82242	1.19175	-1.60975	0.766891	-0.0770562	-0.806547	1.95182	0.511681	1.45641	1.72854	2.00189	0.555267
A_24_P383850	EIF4G3	chr1	p36.12	-1.01554	0.761935	0.435695	-0.160092	-1.33115	-1.38998	-1.29839	-1.40371	-0.504011	-1.08582	0.477043	-1.8773	-0.901339	-0.239276	-0.896991	-1.18493	-0.97476	-1.09388	-1.20602	0.152686	-0.926913	-1.12661	-1.01554	-1.38981	0.04233	0.285992	-1.52591	0.164099	0.400174	2.02319	1.25761	-1.66439	0.990694	0.458564	1.79587	0.866593	0.856788	0.968409	1.81249	1.5092	0.20885	-1.72134	1.5443	0.795958	0.262343	0.71267
A_23_P11144	CHM	chrX	q21.2	-1.01601	0.146743	-0.0430136	-1.01973	-1.33258	-0.901389	-0.0428757	-1.0352	-0.277572	-0.405784	0.196397	1.61824	-1.28471	-1.22216	-0.512679	-1.01601	-1.33598	0.0214472	-0.984514	-0.480376	1.24798	-1.17936	-0.664008	-0.882488	-1.12912	-1.18436	-2.16247	-1.23302	0.290499	-0.387442	-0.54184	-0.321743	-0.188867	-0.277852	1.99094	-0.230625	-0.0980497	1.98399	-0.0430136	0.0574752	0.325381	0.777045	0.284131	0.184897	0.0698335	1.51125
A_24_P928408	SATB2	chr2	q33.1	-1.01726	0.357333	0.304052	-1.14281	-1.31352	-0.101862	-1.0378	-1.11941	0.281734	-1.37301	-1.13713	-0.994746	-1.06517	-0.548705	-0.990617	0.320506	-0.477697	-0.792496	-1.15743	-1.01726	-0.904233	-0.948934	-0.136483	-1.25493	-1.34146	-1.20987	-1.41725	-1.25312	-0.349264	0.157285	0.0877414	0.980062	1.25417	-0.0920191	1.64372	1.14076	-0.589325	0.22549	1.35132	1.14731	0.304052	2.06905	-0.119391	2.46918	0.331735	0.456478
A_23_P393051	C1orf172	chr1	p36.11	-1.01889	0.475331	0.0344985	-0.245702	-0.329616	-1.12172	-1.22404	-2.91204	0.571675	0.44271	0.313928	-0.391156	-0.969995	-1.49811	-1.14356	-1.46053	-0.840004	-2.55651	-1.01889	-1.99435	-1.11684	-1.72521	-1.17469	2.33426	-0.338849	-0.59496	0.212522	-0.171221	-0.0062351	0.591303	0.359358	1.15607	0.147072	0.663686	0.763042	1.31931	0.554203	0.332435	1.42745	1.23172	0.862765	0.751592	0.833834	0.343426	0.0828572	0.105267
A_23_P396858	FZD8	chr10	p11.21	-1.02051	0.813696	-0.0996411	-1.25815	-0.410314	-1.52341	0.437612	-0.212331	-1.1892	0.781513	0.487736	-0.122508	0.0161886	-1.02051	-1.345	-0.778672	-0.719538	-0.794505	-1.13604	-1.2974	-1.25811	-0.797018	-0.066093	-1.18624	-1.29016	-1.23115	-1.36001	-1.22314	0.80545	0.996294	1.97334	1.70595	1.43914	0.866526	1.80168	1.7732	0.104452	1.62275	-1.16666	0.331684	0.420102	1.79097	-1.14987	0.269724	-0.520389	0.821942
A_24_P465847	VPS37B	chr12	q24.31	-1.0227	0.807861	0.148113	-1.07764	0.136067	0.180118	-1.08966	-1.19433	-0.827545	-1.57348	0.538713	-0.534669	-1.0227	-0.944537	-0.912937	-1.48231	-1.21536	-0.964409	0.185182	-1.00616	-1.53271	-1.50372	-1.61208	-1.07194	-0.594456	-1.34603	-1.77209	0.942316	1.24716	1.31848	1.44745	1.11234	1.87513	1.05027	1.53633	1.08388	0.678498	0.588874	0.148113	0.193437	0.991689	0.412772	0.703138	1.47036	-0.584376	0.388222
A_23_P68700	DNAJC28	chr21	q22.11	-1.02281	0.540046	-0.196309	0.693364	-0.0104141	-1.02281	-1.5136	-1.69064	-0.573794	0.428545	-0.284798	0.470133	-1.16397	-1.26739	-0.960525	-1.61902	-1.81061	-1.87002	-1.17568	-1.16596	-1.80301	-0.106087	0.709733	0.725493	-1.11873	-0.228346	0.0316607	-0.173483	0.423844	0.835035	1.00405	1.62266	0.240793	0.663946	2.15406	-0.533142	-0.979566	0.921289	-0.955428	-0.761916	0.978905	-0.537026	0.716411	-0.385052	-0.351671	1.21072
A_23_P82088	NRN1	chr6	p25.1	-1.02711	0.614677	0.284347	-0.55882	-0.423061	-1.17107	-0.821941	-0.928986	-1.18031	-1.02711	-0.540309	-1.11689	-1.08787	-1.23858	-1.13218	-1.34601	-0.465811	-0.914498	-1.13467	0.342657	-0.440717	-1.23152	-0.980818	0.365673	-1.06089	-1.19338	-1.00035	-0.0657568	0.723634	0.42608	0.287643	1.24162	0.553549	-0.58184	1.1022	1.02953	0.163667	0.704907	0.30654	0.589347	1.63006	-1.0469	-0.927438	-0.282447	0.0756281	0.640007
A_23_P43095	ZFHX4	chr8	q21.11	-1.04918	0.914155	0.298719	-0.923	-1.05069	-1.32313	-1.26879	-1.04918	-1.07567	-1.10185	-1.15037	-1.20643	-1.13829	-0.949561	-1.03159	-1.20056	-0.464652	-0.852692	-1.04156	-0.821582	-0.902523	-0.955557	-0.877253	-0.968898	-1.16289	-0.959762	-1.07317	-1.0957	0.938914	1.26251	1.54065	1.2838	2.09854	1.45222	1.08361	1.70477	1.61332	0.768953	1.21287	0.385976	0.671623	-1.03001	1.1809	-1.00285	0.89957	1.07099
A_23_P338372	NR2E1	chr6	q21	-1.05418	0.947649	0.36409	-0.984886	-0.974171	-1.03685	-1.06488	-1.07707	-1.00361	-0.992678	-0.943056	-1.08385	-1.05584	-1.15279	-1.05418	-1.09499	-1.03537	-1.16256	-1.00251	-1.0834	-1.06931	-1.10225	-1.09899	-0.903941	-0.917991	-0.998919	-0.914924	-1.02834	1.00426	-0.100857	0.921985	2.1464	0.932467	1.30093	1.33317	0.302633	1.01398	0.273725	0.556159	1.84919	-0.603246	2.25402	1.38476	-0.827523	0.543233	1.11997
A_23_P310439	CRYGN	chr7	q36.1	-1.05741	0.118532	0.289334	-0.228114	-0.227397	-0.909728	-1.38169	-0.40258	-0.541705	-0.635785	-0.53239	-1.18927	0.166201	-1.25153	-1.05741	-1.43293	-1.65434	-1.59841	-1.66513	-1.31082	-1.17001	-1.11437	-1.07063	-0.272579	0.110174	-0.261952	0.13131	0.0236352	-0.17943	0.0180505	-0.4087	0.921852	-0.217263	-0.642958	-0.0594849	-0.36085	4.06377	2.6521	0.428281	0.523975	-0.222308	-0.516807	0.937753	-0.161448	0.287347	0.263623
A_23_P160367	THRAP3	chr1	p34.3	-1.0621	0.574854	-0.043037	-0.137544	-0.00650988	-1.30608	-1.54967	0.268803	1.00341	0.342297	0.0383643	-1.83867	-0.875655	-1.0621	-1.23065	-1.86993	-0.563337	-1.29002	-1.60629	-1.35477	-1.14074	-1.37163	-1.50366	-1.893	0.48627	0.572503	0.171377	0.254197	0.263395	1.67552	1.26905	0.324012	1.01166	0.747602	1.79802	1.6603	1.38499	0.923565	2.44221	0.153988	0.446128	0.87492	1.2057	1.41078	0.361376	0.458071
A_23_P71480	DEFB1	chr8	p23.1	-1.06536	0.0263896	0.153168	-0.202627	-0.383286	-1.09561	-1.50569	-1.34895	1.73099	1.01135	0.838451	-1.4608	-1.06536	-0.551248	-1.7964	-1.38884	-0.800638	-1.49871	-1.72033	-1.19296	-0.773827	-1.17342	-1.5885	-0.20708	0.454536	0.140691	-0.0450199	0.712515	-0.173127	0.0923392	-0.0554798	-0.70366	0.345144	1.18885	0.930345	2.60541	1.07406	-0.376821	0.65342	0.467436	2.41539	2.28431	0.556592	0.322475	0.955541	-0.239542
A_23_P4387	KRT24	chr17	q21.2	-1.07489	0.13486	0.452652	0.601003	0.362761	-1.51179	-1.34131	-3.05152	-0.129558	-0.604431	-0.464451	-1.79117	-0.496598	-1.69718	-1.72474	-1.2071	-1.382	-1.46741	-1.07489	-1.04321	-1.53697	-1.74899	1.13837	0.784515	-0.307874	-0.0495678	0.964872	1.20679	-0.42527	2.14476	2.07626	-0.218265	1.0307	-0.72931	0.553129	-0.907944	0.340003	0.472061	0.726848	0.132949	-0.527734	-0.60442	0.0247767	1.3521	0.299499	-0.414278
A_23_P71017	CLDN3	chr7	q11.23	-1.08089	0.137328	0.288579	-0.399544	0.150886	-1.58572	-1.77148	-0.500557	0.0743097	-0.308464	0.211128	-0.62965	-1.49384	-1.12908	-1.53175	-1.11131	-1.3196	-0.593026	-1.08089	-1.29106	-1.47162	-1.47041	-1.4058	0.532055	0.631925	-0.494217	-0.2724	0.0572918	-0.164706	-0.112578	-0.323692	0.373884	-0.371413	0.251865	0.483792	3.74043	0.418497	-0.166987	2.36132	0.614385	0.236018	0.489468	2.71752	-0.0381522	0.699983	0.332822
A_24_P387869	PKN2	chr1	p22.2	-1.0942	0.705419	0.553545	-0.812627	0.414335	-1.33422	0.333977	-0.115217	0.633565	-1.07872	-0.918785	-1.39811	-1.32713	-1.53653	-1.39236	-1.63986	-2.57549	-1.64928	0.299485	-1.28816	-1.06754	0.456283	-1.17473	-1.26079	0.343598	-1.18662	-1.0942	0.271283	0.636122	0.867778	1.18345	0.916449	0.632733	0.424224	1.47868	0.998757	1.60841	1.32331	1.66454	-1.41436	1.14386	0.908523	1.33782	0.788348	-0.748741	0.211632
A_24_P399500	PCP2	chr19	p13.2	-1.11275	0.376427	0.23694	0.178068	-0.220472	-1.3297	-1.42574	-1.22197	-0.0661495	-0.193219	-0.525787	-0.592737	-1.24587	-0.76319	-1.59648	-1.60777	-1.18029	-1.11275	-0.778625	-1.65489	-1.66385	-1.66587	-1.13188	4.72321	-0.0426452	-0.210763	-0.43331	0.537662	0.462724	0.174192	0.0519718	0.934131	-0.340648	0.246503	0.331487	0.758924	-0.247144	-0.020273	0.251646	0.324722	-0.464575	0.726777	1.37772	2.84867	0.717704	1.64837
A_23_P315122	EMX1	chr2	p13.2	-1.1183	0.245334	0.251767	0.0309123	-0.303332	-1.36726	-1.44023	-1.70419	0.37227	-0.366685	0.170353	-0.974012	-0.996471	-1.06938	-1.55937	-1.25762	-1.49281	-1.41907	-1.53762	-1.18484	-1.49037	-1.19049	-1.1183	-0.0892003	0.456088	-0.436344	-0.986331	0.605089	0.517747	-0.371967	-0.821951	0.960936	-0.266736	0.155157	-0.387223	0.292863	0.382973	-0.38789	0.0146899	0.388145	-0.234372	3.51406	0.0866649	-0.0459377	0.185377	1.00839
A_23_P131428	VAX2	chr2	p13.3	-1.13405	0.804093	0.268665	-1.17717	-1.13405	-1.2253	-0.912254	-0.389296	-1.50615	-1.43556	0.815027	-1.09953	-0.938797	-1.15304	0.456284	0.0155952	-1.14716	-1.13514	-0.986875	-1.11413	-1.24531	-1.18834	-1.07572	0.61602	-1.49689	-1.32485	0.910533	0.454236	0.4582	0.93769	0.826031	1.34641	1.28698	0.026922	1.23823	-0.332327	0.238449	0.99859	0.283709	0.782155	-0.298934	1.92987	1.00538	-0.306144	0.840204	-0.33575
A_23_P23029	BSND	chr1	p32.3	-1.1456	0.545974	0.62284	0.842838	-0.588675	-1.06807	-1.46968	-1.98894	-0.804097	-0.0619486	-0.614763	-1.25504	-1.23427	-2.04419	-0.882151	-2.30737	-1.1456	-1.52325	-1.26441	-2.20227	-1.33782	-1.43948	0.672753	0.377042	-0.0495785	0.0744254	0.0790813	0.378828	-0.401456	0.577481	0.723455	-0.60302	0.169337	-0.514369	-0.43136	0.506631	0.17622	0.787539	0.981975	0.580049	-0.176359	-0.54673	1.38092	0.788548	0.670909	0.514467
A_24_P165545	TTLL10	chr1	p36.33	-1.16905	0.141898	-0.0540703	0.361273	0.108698	-1.16905	-1.09564	-0.307628	0.594502	0.00487779	1.3717	-1.32156	-1.58408	1.04417	-1.67547	-1.61083	-1.451	-1.3328	-1.8999	-1.91829	-1.28975	-1.24574	-1.75439	-0.325409	0.089509	1.1549	-0.00270992	-0.307132	0.143273	-0.0601595	0.289825	0.825703	-0.0521746	0.689363	1.20293	0.0238041	2.4918	0.385795	0.0743651	1.16651	0.513471	0.591864	0.0317072	0.434331	0.74492	-0.240475
A_24_P203622	DOCK7	chr1	p31.3	-1.16996	0.645162	0.350368	0.031767	-1.59223	-1.29665	0.283724	-0.872604	0.371623	-1.49127	-1.75089	0.41252	0.28471	-1.39707	-1.2963	0.611555	-1.94175	0.109702	-1.80599	-2.16514	0.412238	0.583611	0.784924	-1.83639	-1.77093	-1.16996	-2.11731	-1.90815	1.31268	1.24674	1.41691	0.955735	1.36819	0.946475	0.531705	0.488544	1.02604	0.779328	0.680408	0.997716	0.462866	0.110536	0.212021	0.213916	-1.16074	1.0895
A_23_P32165	LHX2	chr9	q33.3	-1.17414	0.691478	0.245152	0.122531	-1.31513	-1.28552	-1.32379	-1.03824	-0.573213	-1.30332	-1.20405	-0.98658	-1.2199	-0.812682	-0.87698	0.858933	-0.829068	-0.0389194	-1.15351	-1.00934	-1.34873	-1.17414	-1.33593	-1.26038	-1.2232	-1.17994	-1.34311	-1.22976	0.369085	-0.963524	0.203011	0.660317	0.67766	0.445692	0.474272	1.02009	0.241605	1.20819	0.341435	0.692988	1.93279	1.79074	1.79181	0.640502	0.726053	1.11797
A_23_P144796	PDLIM4	chr5	q31.1	-1.18533	0.930011	-0.0651734	1.02823	0.421766	-1.38723	-1.37298	-1.18705	-1.25684	-1.18533	-0.484986	-1.02027	-1.16756	-0.598275	-0.774067	-1.76299	-0.75274	-0.392813	-1.4876	-1.4545	-0.764394	-1.24173	-1.25231	-0.755797	-1.04373	-1.57173	-1.68954	0.833297	1.65152	0.693305	1.58173	0.59133	1.19551	0.822989	0.954016	1.50863	-0.0651734	0.683638	0.48339	0.343478	0.515681	-0.475215	-0.209485	0.823958	1.28217	1.55979
A_23_P13455	OR51A7	chr11	p15.4	-1.19249	0.347998	0.485492	0.297892	0.114808	-1.09501	-1.19249	1.11132	0.263889	-0.0383457	0.0215186	-1.92074	-0.872709	-2.55611	-2.03304	-1.57462	-2.19257	-1.87506	-2.28981	-1.23882	-2.23102	-1.53201	-2.02415	0.534105	0.582335	0.352485	0.962643	0.633148	0.72868	-0.219477	0.500673	5.22363130754384e-05	0.0607399	0.0354781	0.460098	0.0550734	0.738237	0.356222	0.44026	0.0787696	0.622259	-0.121008	0.976536	0.190064	0.485069	0.485026
A_23_P92909	SPINK6	chr5	q32	-1.20935	0.329651	0.177634	0.467827	0.970229	-0.73957	-1.44309	-2.06034	0.520124	0.200421	0.319371	1.20243	-0.74415	-1.57497	-1.7256	-1.85845	-1.48288	-2.54568	-1.20935	-2.13398	-1.49977	-1.96798	-1.74137	3.34456	0.420372	0.958169	-0.252853	-0.165826	0.0818121	-0.257838	0.11845	0.343858	0.320171	0.396739	0.465115	0.127201	-0.17424	0.787903	0.767041	1.35753	-0.0126596	0.177634	0.454161	0.525902	0.418275	0.309344
A_23_P16384	NLRP7	chr19	q13.42	-1.24284	0.0124507	0.294042	0.0472408	-0.0589454	-1.81005	0.0795094	0.675021	-0.11664	0.0555776	-0.0510965	-1.53526	-0.536348	-1.92471	-1.57649	-1.65808	-1.69152	-1.56681	-1.65636	-1.86428	-1.24284	-1.93584	-1.69131	-0.0581672	0.0341146	0.483981	-0.159796	0.18529	1.48931	-0.0749515	-0.558306	1.54704	-0.0371037	0.174237	1.07489	-0.0913561	-0.239757	0.482373	0.294042	1.77296	1.42317	1.31696	-0.0188027	3.0591	0.482643	-0.121812
A_24_P130691	TMPRSS6	chr22	q12.3	-1.24311	0.419014	0.429449	0.228817	-0.408294	-1.50705	-1.691	0.796514	-0.484654	0.673155	0.550288	-1.42011	-1.47431	-1.24311	-1.56758	-1.53523	-1.58563	-1.24159	-1.71011	-1.27471	-1.00808	-1.72512	-1.49641	0.429449	0.36346	-0.387342	0.203401	-0.439619	0.802988	-0.313492	0.434838	-0.570301	-0.397533	0.69462	0.173709	-0.115116	-0.404967	-0.515954	0.246828	0.973264	2.2137	0.657666	-0.561	0.823716	0.425855	0.430679
A_24_P198044	ZNF483	chr9	q31.3	-1.27474	0.55081	0.185866	-0.184039	-0.500532	-1.82267	-2.23618	-1.27474	0.112432	0.575859	0.379284	-1.71909	-1.78213	-0.70157	-1.87358	-1.48068	-2.01373	-1.73911	-1.66945	-2.04136	-0.685032	-0.660831	-1.56825	0.173454	0.0188232	0.473238	0.232014	-0.267421	1.43608	0.852548	2.02214	2.07453	0.619078	1.22085	2.06168	0.461009	0.248466	-0.0287661	0.697253	0.548989	0.305612	0.185866	0.786929	0.55263	-0.126653	-0.368866
A_24_P402090	C17orf71	chr17	q22	-1.34748	0.567283	0.239317	-0.594014	0.425468	-0.779194	-1.47771	-2.7184	0.394969	-0.443081	0.147197	-1.34748	-1.49546	-1.56591	-1.62007	-1.27308	-1.53451	-1.61384	-1.66399	-1.59479	-1.52278	-1.40947	0.545913	-0.625758	-0.49533	-0.0448262	0.569924	-0.68101	0.485321	0.500952	0.859108	1.49723	0.967354	0.55252	2.52171	1.61513	1.19119	-0.550142	-0.180594	-0.581802	0.950317	1.02583	0.824629	1.02659	0.535618	0.590721
A_24_P357916	ADAMTS20	chr12	q12	-1.35477	0.0957602	0.129155	-0.205255	0.653816	-1.62466	-2.10878	-0.477382	1.11113	0.502109	0.295015	-2.103	-2.054	-1.79466	-1.35477	-0.396404	-1.48911	-1.64289	-1.48305	-1.15415	-1.9448	-1.65137	-1.50438	0.866941	0.328676	0.809838	0.346201	-0.0642094	0.55268	-0.182326	0.0174901	0.581567	0.414598	0.339028	0.91277	0.754256	0.129155	-0.149592	-0.00451652	-0.112309	1.89913	0.557648	-0.049193	-0.0782915	0.0868803	-0.0575773
A_23_P369343	KLK8	chr19	q13.41	-1.37027	0.245351	0.3278	-0.284984	0.115195	-2.29804	-1.58269	-1.37027	0.541474	0.15254	0.31874	-1.07631	-0.135597	-1.39934	-1.84463	-1.50191	-1.86127	-1.3878	-1.59531	-1.65036	-1.80546	-1.25526	-1.51651	1.5037	-0.224367	0.265161	-0.461841	0.126471	0.277939	-0.233324	-0.456419	1.63729	0.0232522	0.90587	0.112118	0.842757	3.52272	0.0750145	-0.100943	0.834405	0.649	0.340995	0.0627955	0.151372	0.485531	0.0816803
[truncated: 29 more columns]
